# Supplementary material for: Melanoma-intrinsic β-catenin signalling prevents anti-tumour immunity
Source: Springer Nature journal article supplement (doi:10.1038/nature14404), 2015-05-11
Supplement: 41586_2015_BFnature14404_MOESM7_ESM.pdf [file 41586_2015_BFnature14404_MOESM7_ESM.pdf]

SI table 1a Expression of T cell genes per cluster

| patient cluster | T cell genes |           |           |           |           |           |           |           |           |           |           |           |
|-----------------|--------------|-----------|-----------|-----------|-----------|-----------|-----------|-----------|-----------|-----------|-----------|-----------|
|                 | CD8A         | CCL2      | CCL3      | CCL4      | CXCL9     | CXCL10    | ICOS      | GZMK      | IRF1      | HLA.DMB   | HLA.DOA   | HLA.DOB   |
| 1               | 3.6832892    | 6.7974173 | 4.9118746 | 3.6613659 | 5.732672  | 4.5320176 | 1.7417058 | 1.6812545 | 7.4759804 | 7.2386176 | 5.9046982 | 2.0607796 |
| 2               | 5.1084714    | 7.5883482 | 4.8880919 | 4.4454526 | 6.2238186 | 5.3956948 | 1.3435597 | 3.2719023 | 8.0765369 | 8.0911727 | 6.9252198 | 1.8994957 |
| 3               | 6.6411908    | 7.9663054 | 6.2838387 | 6.1201209 | 8.7025521 | 7.7625235 | 3.7485523 | 5.020754  | 9.1398091 | 8.8210711 | 7.8880852 | 3.528072  |
| 4               | 7.9235616    | 8.0912995 | 6.7430475 | 6.7544776 | 9.5272179 | 7.8309947 | 4.4497914 | 6.2910339 | 9.9084662 | 9.6180791 | 8.6923901 | 5.0735598 |
| 5               | 7.6240597    | 9.7935093 | 6.9192491 | 6.7733453 | 9.6442421 | 8.3030227 | 4.4099426 | 6.4579512 | 9.872659  | 10.668164 | 9.9402751 | 4.8154232 |
| 6               | 9.7118658    | 9.3139028 | 7.9077056 | 8.2940909 | 11.792568 | 10.133145 | 6.1419973 | 7.9934483 | 11.200976 | 10.96238  | 10.403972 | 6.3327112 |
| 7               | 9.7473151    | 10.102753 | 7.4481061 | 7.8474628 | 11.573752 | 9.2284892 | 7.1801463 | 8.9996547 | 11.237634 | 11.451084 | 11.036138 | 8.8900534 |
| 8               | 11.694389    | 10.308451 | 9.1280928 | 9.9910829 | 13.785616 | 11.805183 | 7.6875757 | 10.146852 | 12.255512 | 11.92455  | 11.494422 | 7.5359383 |

SI table 1b gene clusters after unsupervised clustering

| Gene ID  | cluster number |
|----------|----------------|
| ABCD2    | 1              |
| AKAP5    | 1              |
| BCL11B   | 1              |
| BLNK     | 1              |
| C3       | 1              |
| CCL22    | 1              |
| CCR2     | 1              |
| CCR4     | 1              |
| CCR5     | 1              |
| CCR8     | 1              |
| CD226    | 1              |
| CD69     | 1              |
| CD96     | 1              |
| CLECL1   | 1              |
| CYTIP    | 1              |
| DAPP1    | 1              |
| FOXP3    | 1              |
| FUT7     | 1              |
| GATA3    | 1              |
| GVIN1    | 1              |
| IL2RB    | 1              |
| IL7R     | 1              |
| IPCEF1   | 1              |
| ITGAD    | 1              |
| KCNA3    | 1              |
| KLRB1    | 1              |
| LRMP     | 1              |
| LY75     | 1              |
| MIAT     | 1              |
| NAPSB    | 1              |
| NCR3     | 1              |
| PLD4     | 1              |
| PTPN22   | 1              |
| PTPRC    | 1              |
| RASGRP1  | 1              |
| S1PR4    | 1              |
| 1-Sep    | 1              |
| SIGLEC8  | 1              |
| SLFN12L  | 1              |
| SPN      | 1              |
| SPNS3    | 1              |
| STAT4    | 1              |
| TAGAP    | 1              |
| TMEM156  | 1              |
| TNFRSF18 | 1              |
| ZNF80    | 1              |
| ZNF831   | 1              |

|          |   |
|----------|---|
| AOAH     | 1 |
| APBB1IP  | 1 |
| APOL1    | 1 |
| APOL3    | 1 |
| APOL4    | 1 |
| ARHGAP9  | 1 |
| BIN2     | 1 |
| C17orf87 | 1 |
| CCL8     | 1 |
| CD180    | 1 |
| CD274    | 1 |
| CD37     | 1 |
| CD53     | 1 |
| CD72     | 1 |
| CD74     | 1 |
| CD80     | 1 |
| CIITA    | 1 |
| CLEC12A  | 1 |
| CLEC4E   | 1 |
| CORO1A   | 1 |
| CR1      | 1 |
| CSF2RB   | 1 |
| DOCK2    | 1 |
| EBI3     | 1 |
| EMR1     | 1 |
| EPSTI1   | 1 |
| ETV7     | 1 |
| EVI2B    | 1 |
| FAM113B  | 1 |
| FGD2     | 1 |
| GIMAP7   | 1 |
| HCG26    | 1 |
| HCP5     | 1 |
| HLA-DMA  | 1 |
| HLA-DMB  | 1 |
| HLA-DOA  | 1 |
| HLA-DPA1 | 1 |
| HLA-DPB1 | 1 |
| HLA-DPB2 | 1 |
| HLA-DQA1 | 1 |
| HLA-DQA2 | 1 |
| HLA-DQB1 | 1 |
| HLA-DQB2 | 1 |
| HLA-DRA  | 1 |
| HLA-DRB1 | 1 |
| HLA-DRB5 | 1 |
| HLA-DRB6 | 1 |
| HSD11B1  | 1 |
| IKZF1    | 1 |

|           |   |
|-----------|---|
| IL10RA    | 1 |
| IL12RB1   | 1 |
| IL18      | 1 |
| IL21R     | 1 |
| IL2RA     | 1 |
| IL32      | 1 |
| IRF1      | 1 |
| IRF8      | 1 |
| KLHDC7B   | 1 |
| LILRB1    | 1 |
| LILRB2    | 1 |
| LOC606724 | 1 |
| MYO1G     | 1 |
| NCF1      | 1 |
| NCF1B     | 1 |
| NCF1C     | 1 |
| NCKAP1L   | 1 |
| NLRC3     | 1 |
| P2RY13    | 1 |
| PDCD1LG2  | 1 |
| PLEK      | 1 |
| PSTPIP1   | 1 |
| PTPN6     | 1 |
| PTPN7     | 1 |
| RARRES3   | 1 |
| RASAL3    | 1 |
| SASH3     | 1 |
| SIGLEC10  | 1 |
| SIGLEC14  | 1 |
| SIGLEC5   | 1 |
| SLA       | 1 |
| SNX20     | 1 |
| SPOCK2    | 1 |
| TLR8      | 1 |
| VAV1      | 1 |
| VNN2      | 1 |
| WAS       | 1 |
| WDFY4     | 1 |
| ZC3H12D   | 1 |
| ACAP1     | 1 |
| ADAM6     | 1 |
| ADAMDEC1  | 1 |
| ANKRD22   | 1 |
| BANK1     | 1 |
| BLK       | 1 |
| BTLA      | 1 |
| C16orf54  | 1 |
| C4orf7    | 1 |
| C5orf20   | 1 |

|          |   |
|----------|---|
| C8orf80  | 1 |
| CARD11   | 1 |
| CCL19    | 1 |
| CCL21    | 1 |
| CCL5     | 1 |
| CCR6     | 1 |
| CCR7     | 1 |
| CD19     | 1 |
| CD2      | 1 |
| CD247    | 1 |
| CD27     | 1 |
| CD38     | 1 |
| CD3D     | 1 |
| CD3E     | 1 |
| CD3G     | 1 |
| CD40LG   | 1 |
| CD48     | 1 |
| CD5      | 1 |
| CD52     | 1 |
| CD6      | 1 |
| CD7      | 1 |
| CD79A    | 1 |
| CD8A     | 1 |
| CD8B     | 1 |
| CLEC17A  | 1 |
| CRTAM    | 1 |
| CST7     | 1 |
| CTSW     | 1 |
| CXCL10   | 1 |
| CXCL11   | 1 |
| CXCL13   | 1 |
| CXCL9    | 1 |
| CXCR2P1  | 1 |
| CXCR3    | 1 |
| CXCR5    | 1 |
| CXCR6    | 1 |
| DNASE1L3 | 1 |
| DTHD1    | 1 |
| FAM129C  | 1 |
| FAM26F   | 1 |
| FASLG    | 1 |
| FCER2    | 1 |
| FCRL2    | 1 |
| FCRL3    | 1 |
| FCRL5    | 1 |
| FCRL6    | 1 |
| FLT3     | 1 |
| GBP1     | 1 |
| GBP4     | 1 |

|           |   |
|-----------|---|
| GBP5      | 1 |
| GNLY      | 1 |
| GPR114    | 1 |
| GPR171    | 1 |
| GPR174    | 1 |
| GPR18     | 1 |
| GZMA      | 1 |
| GZMB      | 1 |
| GZMH      | 1 |
| GZMK      | 1 |
| HLA-DOB   | 1 |
| HSH2D     | 1 |
| ICOS      | 1 |
| IDO1      | 1 |
| IFNG      | 1 |
| IGJ       | 1 |
| IKZF3     | 1 |
| IL2RG     | 1 |
| ITGAL     | 1 |
| ITK       | 1 |
| JAKMIP1   | 1 |
| KIAA0125  | 1 |
| KIAA0748  | 1 |
| KIR2DL4   | 1 |
| KLRC1     | 1 |
| KLRD1     | 1 |
| KLRK1     | 1 |
| LAG3      | 1 |
| LAX1      | 1 |
| LCK       | 1 |
| LGALS2    | 1 |
| LILRA4    | 1 |
| LOC100233 | 1 |
| LOC400759 | 1 |
| LOC96610  | 1 |
| LTA       | 1 |
| LTB       | 1 |
| LY9       | 1 |
| MGC29506  | 1 |
| MS4A1     | 1 |
| NKG7      | 1 |
| P2RY10    | 1 |
| PARP15    | 1 |
| PAX5      | 1 |
| PDCD1     | 1 |
| PLA2G2D   | 1 |
| PLAC8     | 1 |
| PNOC      | 1 |
| POU2AF1   | 1 |

|           |   |
|-----------|---|
| PRF1      | 1 |
| PRKCQ     | 1 |
| PTPRCAP   | 1 |
| PYHIN1    | 1 |
| RHOH      | 1 |
| RLTPR     | 1 |
| SAMD3     | 1 |
| SELL      | 1 |
| SH2D1A    | 1 |
| SIRPG     | 1 |
| SIT1      | 1 |
| SLA2      | 1 |
| SLAMF1    | 1 |
| SLAMF6    | 1 |
| SLC27A2   | 1 |
| SP140     | 1 |
| SPIB      | 1 |
| STAP1     | 1 |
| TARP      | 1 |
| TBC1D10C  | 1 |
| TBX21     | 1 |
| TCL1A     | 1 |
| THEMIS    | 1 |
| TIFAB     | 1 |
| TIGIT     | 1 |
| TIMD4     | 1 |
| TLR10     | 1 |
| TMEM155   | 1 |
| TNFRSF13B | 1 |
| TNFRSF17  | 1 |
| TNFRSF9   | 1 |
| TNIP3     | 1 |
| TOX       | 1 |
| TRAF3IP3  | 1 |
| TRAT1     | 1 |
| TREML2    | 1 |
| UBASH3A   | 1 |
| UBD       | 1 |
| VPREB3    | 1 |
| XCL1      | 1 |
| XCL2      | 1 |
| ZAP70     | 1 |
| ZBED2     | 1 |
| ZBP1      | 1 |
| ZNF683    | 1 |
| ANO9      | 1 |
| BCL2L14   | 1 |
| C14orf64  | 1 |
| C14orf73  | 1 |

|           |   |
|-----------|---|
| CD244     | 1 |
| CLEC9A    | 1 |
| DENND2D   | 1 |
| GCET2     | 1 |
| GP1BA     | 1 |
| IL18R1    | 1 |
| IL18RAP   | 1 |
| ITGB7     | 1 |
| PRKCB     | 1 |
| RAB37     | 1 |
| RASGRP2   | 1 |
| RBP5      | 1 |
| SLAMF7    | 1 |
| SLC12A3   | 1 |
| XCR1      | 1 |
| ABI3      | 2 |
| ADAM28    | 2 |
| ADAP2     | 2 |
| AIF1      | 2 |
| ARHGAP30  | 2 |
| ARL11     | 2 |
| ASCL2     | 2 |
| BATF      | 2 |
| BTK       | 2 |
| C10orf128 | 2 |
| C1orf162  | 2 |
| C1QA      | 2 |
| C1QB      | 2 |
| C1QC      | 2 |
| C3AR1     | 2 |
| CASP5     | 2 |
| CCL3      | 2 |
| CCL3L1    | 2 |
| CCL4      | 2 |
| CCL4L2    | 2 |
| CCRL2     | 2 |
| CD14      | 2 |
| CD163     | 2 |
| CD200R1   | 2 |
| CD28      | 2 |
| CD300A    | 2 |
| CD300C    | 2 |
| CD300LF   | 2 |
| CD33      | 2 |
| CD84      | 2 |
| CD86      | 2 |
| CLEC4A    | 2 |
| CLEC7A    | 2 |
| CMKLR1    | 2 |

|         |   |
|---------|---|
| CSF1R   | 2 |
| CXorf21 | 2 |
| CYBB    | 2 |
| CYSLTR1 | 2 |
| CYTH4   | 2 |
| DOCK8   | 2 |
| DOK2    | 2 |
| DPEP2   | 2 |
| FCER1G  | 2 |
| FCGR1A  | 2 |
| FCGR1B  | 2 |
| FCGR1C  | 2 |
| FCGR3A  | 2 |
| FMNL1   | 2 |
| FPR1    | 2 |
| FPR2    | 2 |
| FPR3    | 2 |
| GAPT    | 2 |
| GGTA1   | 2 |
| GIMAP1  | 2 |
| GIMAP4  | 2 |
| GIMAP5  | 2 |
| GIMAP6  | 2 |
| GIMAP8  | 2 |
| GNA15   | 2 |
| GNGT2   | 2 |
| GPBAR1  | 2 |
| GPR65   | 2 |
| GPR82   | 2 |
| HAVCR2  | 2 |
| HCK     | 2 |
| HCLS1   | 2 |
| HCST    | 2 |
| HK3     | 2 |
| IFI30   | 2 |
| IGSF6   | 2 |
| IL10    | 2 |
| IL15RA  | 2 |
| IL27    | 2 |
| IL411   | 2 |
| INPP5D  | 2 |
| ITGB2   | 2 |
| LAIR1   | 2 |
| LAPTM5  | 2 |
| LILRA1  | 2 |
| LILRA2  | 2 |
| LILRA3  | 2 |
| LILRA5  | 2 |
| LILRA6  | 2 |

|           |   |
|-----------|---|
| LILRB3    | 2 |
| LILRB4    | 2 |
| LRRC25    | 2 |
| LSP1      | 2 |
| LST1      | 2 |
| LY86      | 2 |
| MEFV      | 2 |
| MFNG      | 2 |
| MNDA      | 2 |
| MPEG1     | 2 |
| MS4A4A    | 2 |
| MS4A6A    | 2 |
| MSR1      | 2 |
| MYO1F     | 2 |
| NCF2      | 2 |
| NCF4      | 2 |
| NFAM1     | 2 |
| P2RY6     | 2 |
| P2RY8     | 2 |
| PARVG     | 2 |
| PIK3CG    | 2 |
| PIK3R5    | 2 |
| PILRA     | 2 |
| PTAFR     | 2 |
| RCSD1     | 2 |
| RGS18     | 2 |
| SAMSN1    | 2 |
| SECTM1    | 2 |
| SELPLG    | 2 |
| SIGLEC1   | 2 |
| SIGLEC11  | 2 |
| SIGLEC16  | 2 |
| SIGLEC7   | 2 |
| SIGLEC9   | 2 |
| SLAMF8    | 2 |
| SLCO2B1   | 2 |
| SPI1      | 2 |
| STAC3     | 2 |
| TFEC      | 2 |
| TLR7      | 2 |
| TMEM150B  | 2 |
| TNFAIP8L2 | 2 |
| TNFRSF1B  | 2 |
| TNFSF8    | 2 |
| TYROBP    | 2 |
| VSIG4     | 2 |
| ACSL5     | 2 |
| ADORA3    | 2 |
| ALOX5     | 2 |

|          |   |
|----------|---|
| ALOX5AP  | 2 |
| AMICA1   | 2 |
| APOB48R  | 2 |
| APOBEC3H | 2 |
| ARHGAP15 | 2 |
| ARHGAP25 | 2 |
| ARHGDIB  | 2 |
| ATP8B4   | 2 |
| BIRC3    | 2 |
| C2       | 2 |
| C4A      | 2 |
| C6orf97  | 2 |
| CARD9    | 2 |
| CASS4    | 2 |
| CCDC69   | 2 |
| CCND2    | 2 |
| CCR1     | 2 |
| CD1D     | 2 |
| CD4      | 2 |
| CEACAM21 | 2 |
| CECR1    | 2 |
| CFB      | 2 |
| CLIC2    | 2 |
| CMAH     | 2 |
| CRYBB1   | 2 |
| CSF1     | 2 |
| CSF3R    | 2 |
| CTSS     | 2 |
| DPYD     | 2 |
| EVI2A    | 2 |
| FAM105A  | 2 |
| FAM49A   | 2 |
| FBP1     | 2 |
| FGL2     | 2 |
| FGR      | 2 |
| FLI1     | 2 |
| FLVCR2   | 2 |
| FYB      | 2 |
| GAB3     | 2 |
| GBP2     | 2 |
| GCH1     | 2 |
| GFI1     | 2 |
| GLIPR1   | 2 |
| GPR141   | 2 |
| GPR183   | 2 |
| GPR34    | 2 |
| GPR84    | 2 |
| GRIN3A   | 2 |
| IL15     | 2 |

|           |   |
|-----------|---|
| IL18BP    | 2 |
| ITGAM     | 2 |
| ITM2A     | 2 |
| KCNK13    | 2 |
| KLHL6     | 2 |
| LCP1      | 2 |
| LGALS9    | 2 |
| LGALS9C   | 2 |
| LOC100272 | 2 |
| LPAR5     | 2 |
| MAN1A1    | 2 |
| 1-Mar     | 2 |
| MIR155HG  | 2 |
| MS4A14    | 2 |
| MS4A7     | 2 |
| NAIP      | 2 |
| NLRC4     | 2 |
| NLRP1     | 2 |
| NLRP3     | 2 |
| NOD2      | 2 |
| OSCAR     | 2 |
| P2RY14    | 2 |
| PIK3AP1   | 2 |
| PIK3R6    | 2 |
| PRAM1     | 2 |
| PRDM1     | 2 |
| PSTPIP2   | 2 |
| PTGDR     | 2 |
| PTGER2    | 2 |
| PTGER4    | 2 |
| PTPRO     | 2 |
| RASGEF1B  | 2 |
| RASSF4    | 2 |
| RASSF5    | 2 |
| RIPK3     | 2 |
| RNASE2    | 2 |
| RNASE6    | 2 |
| RSPO3     | 2 |
| RUFY4     | 2 |
| SERPINA1  | 2 |
| SIRPB2    | 2 |
| SLC15A3   | 2 |
| SLC2A5    | 2 |
| SLC7A7    | 2 |
| SLC8A1    | 2 |
| SOCS1     | 2 |
| SRGN      | 2 |
| ST8SIA4   | 2 |
| STX11     | 2 |

|          |   |
|----------|---|
| SUCNR1   | 2 |
| SYK      | 2 |
| TLR4     | 2 |
| TMEM176A | 2 |
| TMEM176B | 2 |
| TNF      | 2 |
| TNFAIP8  | 2 |
| TNFSF10  | 2 |
| TNFSF13B | 2 |
| TREM2    | 2 |
| VCAM1    | 2 |
| ANKRD58  | 2 |
| ATP2A3   | 2 |
| C1orf200 | 2 |
| C9orf139 | 2 |
| CBFA2T3  | 2 |
| CCDC141  | 2 |
| CCDC88B  | 2 |
| CCDC88C  | 2 |
| CCNI2    | 2 |
| CLIC3    | 2 |
| DBH      | 2 |
| DEF6     | 2 |
| DENND1C  | 2 |
| DOK3     | 2 |
| DUSP2    | 2 |
| EPHA1    | 2 |
| FAAH2    | 2 |
| FAM159A  | 2 |
| FAM179A  | 2 |
| FAM18A   | 2 |
| FCHO1    | 2 |
| FGD3     | 2 |
| FLT3LG   | 2 |
| GHRL     | 2 |
| GPA33    | 2 |
| GPR132   | 2 |
| GRAP     | 2 |
| GRAP2    | 2 |
| GZMM     | 2 |
| HVCN1    | 2 |
| IL34     | 2 |
| IL9R     | 2 |
| ILDR1    | 2 |
| INSL3    | 2 |
| JAK3     | 2 |
| KIAA1324 | 2 |
| KIF21B   | 2 |
| LAMP3    | 2 |

|          |   |
|----------|---|
| LAT      | 2 |
| LIME1    | 2 |
| MAP4K1   | 2 |
| MMP25    | 2 |
| NLRP6    | 2 |
| NUAK2    | 2 |
| PACSIN1  | 2 |
| PIM2     | 2 |
| PLCG2    | 2 |
| PLCH2    | 2 |
| POU2F2   | 2 |
| PPP1R16B | 2 |
| PSD4     | 2 |
| PVRIG    | 2 |
| RAC2     | 2 |
| REC8     | 2 |
| RHOF     | 2 |
| SEMA4A   | 2 |
| SERPINF2 | 2 |
| SGPP2    | 2 |
| SH2D2A   | 2 |
| SH2D3A   | 2 |
| SIDT1    | 2 |
| SPATC1   | 2 |
| SUSD3    | 2 |
| SYTL1    | 2 |
| TMC8     | 2 |
| TMIGD2   | 2 |
| TNFSF14  | 2 |
| TTC16    | 2 |
| TTC9     | 2 |
| TUBA4A   | 2 |
| UCP2     | 2 |
| UNC13D   | 2 |
| WNT1     | 2 |
| WNT10A   | 2 |
| ACOXL    | 3 |
| ACSL6    | 3 |
| ACTR3C   | 3 |
| ACY3     | 3 |
| ALDH2    | 3 |
| ALOX15B  | 3 |
| AMIGO2   | 3 |
| ANKRD55  | 3 |
| ASB2     | 3 |
| ATP1A3   | 3 |
| BCL11A   | 3 |
| BEX5     | 3 |
| BFSP2    | 3 |

|          |   |
|----------|---|
| BHLHA15  | 3 |
| BIK      | 3 |
| BSPRY    | 3 |
| BTN1A1   | 3 |
| BZRAP1   | 3 |
| C11orf92 | 3 |
| C11orf93 | 3 |
| C1orf228 | 3 |
| C7       | 3 |
| C7orf29  | 3 |
| CACNA1I  | 3 |
| CADM3    | 3 |
| CAMK4    | 3 |
| CAPG     | 3 |
| CCDC64   | 3 |
| CCL17    | 3 |
| CCL18    | 3 |
| CD1A     | 3 |
| CD1C     | 3 |
| CD1E     | 3 |
| CD22     | 3 |
| CD24     | 3 |
| CD5L     | 3 |
| CD79B    | 3 |
| CDH17    | 3 |
| CES8     | 3 |
| CETP     | 3 |
| CGNL1    | 3 |
| CHI3L1   | 3 |
| CHI3L2   | 3 |
| CHIT1    | 3 |
| CLU      | 3 |
| CNKSR1   | 3 |
| CNR1     | 3 |
| CNTNAP2  | 3 |
| COCH     | 3 |
| COL27A1  | 3 |
| COL4A3   | 3 |
| COL4A4   | 3 |
| CP       | 3 |
| CXorf65  | 3 |
| DACT2    | 3 |
| DERL3    | 3 |
| DPEP1    | 3 |
| DUSP26   | 3 |
| EPHX2    | 3 |
| FA2H     | 3 |
| FAIM3    | 3 |
| FAM46C   | 3 |

|           |   |
|-----------|---|
| FAM65B    | 3 |
| FCER1A    | 3 |
| FOXF1     | 3 |
| GFRA1     | 3 |
| GNA14     | 3 |
| GPAT2     | 3 |
| GPM6A     | 3 |
| HCG22     | 3 |
| HOOK1     | 3 |
| HS3ST2    | 3 |
| IL24      | 3 |
| ITIH3     | 3 |
| KCNJ10    | 3 |
| KCNN3     | 3 |
| KEL       | 3 |
| KIF19     | 3 |
| KLHL14    | 3 |
| KLRC2     | 3 |
| KLRC3     | 3 |
| KLRF1     | 3 |
| LAMC2     | 3 |
| LCN10     | 3 |
| LIPG      | 3 |
| LOC283663 | 3 |
| LOC284749 | 3 |
| LOC389634 | 3 |
| LRRC61    | 3 |
| LRRN2     | 3 |
| MAL       | 3 |
| MAP1LC3C  | 3 |
| MCTP2     | 3 |
| MEF2B     | 3 |
| MEI1      | 3 |
| MST4      | 3 |
| MYBPC2    | 3 |
| MYO7B     | 3 |
| NAP1L2    | 3 |
| NELL2     | 3 |
| NLRP2     | 3 |
| NLRP7     | 3 |
| NMNAT3    | 3 |
| NOG       | 3 |
| NPY1R     | 3 |
| ODZ1      | 3 |
| P2RX1     | 3 |
| P2RX5     | 3 |
| PADI2     | 3 |
| PDE6G     | 3 |
| PIP5K1B   | 3 |

|           |   |
|-----------|---|
| PKP2      | 3 |
| PLCXD3    | 3 |
| PRSS16    | 3 |
| PTGDS     | 3 |
| RAB39B    | 3 |
| RASGEF1A  | 3 |
| RGS9      | 3 |
| RIC3      | 3 |
| SAMD12    | 3 |
| SCNN1B    | 3 |
| SDR42E1   | 3 |
| SERPINB9  | 3 |
| SH2D1B    | 3 |
| SHISA3    | 3 |
| SLC1A2    | 3 |
| SLC22A3   | 3 |
| SLC24A4   | 3 |
| SLC38A1   | 3 |
| SLC38A5   | 3 |
| SLC6A12   | 3 |
| SLCO5A1   | 3 |
| SMOC1     | 3 |
| SMPDL3B   | 3 |
| SV2B      | 3 |
| TAS1R3    | 3 |
| TC2N      | 3 |
| TCEAL2    | 3 |
| TFF3      | 3 |
| TLR9      | 3 |
| TMPRSS13  | 3 |
| TMPRSS3   | 3 |
| TNFRSF11B | 3 |
| TNFRSF13C | 3 |
| TSHR      | 3 |
| TSTD1     | 3 |
| VSIG1     | 3 |
| VTN       | 3 |
| ABCC3     | 4 |
| ADAM8     | 4 |
| AMPD3     | 4 |
| ARHGAP27  | 4 |
| ASGR2     | 4 |
| B3GNT8    | 4 |
| BCAS4     | 4 |
| C10orf54  | 4 |
| C12orf59  | 4 |
| C19orf35  | 4 |
| C1orf54   | 4 |
| C5AR1     | 4 |

|           |   |
|-----------|---|
| CAMK1D    | 4 |
| CCL13     | 4 |
| CCL2      | 4 |
| CCL23     | 4 |
| CD163L1   | 4 |
| CD209     | 4 |
| CD300LB   | 4 |
| CD40      | 4 |
| CEACAM4   | 4 |
| CEBPA     | 4 |
| CEBPE     | 4 |
| CFD       | 4 |
| CFP       | 4 |
| CHST13    | 4 |
| CLEC10A   | 4 |
| CX3CR1    | 4 |
| CXCL16    | 4 |
| CXCR4     | 4 |
| CYP2S1    | 4 |
| DHRS9     | 4 |
| DNAJC5B   | 4 |
| EPHB2     | 4 |
| EYA2      | 4 |
| F13A1     | 4 |
| FCAR      | 4 |
| FCGR2B    | 4 |
| FCN1      | 4 |
| FOLR2     | 4 |
| GBGT1     | 4 |
| GMFG      | 4 |
| GPR120    | 4 |
| HAMP      | 4 |
| ICAM2     | 4 |
| IRF5      | 4 |
| ITGAX     | 4 |
| KCNK6     | 4 |
| KCNMB1    | 4 |
| LAT2      | 4 |
| LCP2      | 4 |
| LILRB5    | 4 |
| LMO2      | 4 |
| LOC283070 | 4 |
| LTC4S     | 4 |
| LYN       | 4 |
| LYZ       | 4 |
| MAPK13    | 4 |
| MLXIPL    | 4 |
| MRC1      | 4 |
| NLRP12    | 4 |

|            |   |
|------------|---|
| OLR1       | 4 |
| OSM        | 4 |
| PLA2G7     | 4 |
| PLXDC2     | 4 |
| PROC       | 4 |
| PTGS1      | 4 |
| PTPRN2     | 4 |
| SDS        | 4 |
| SLC9A9     | 4 |
| SPINT2     | 4 |
| ST14       | 4 |
| ST18       | 4 |
| STAC       | 4 |
| TMSL3      | 4 |
| TNFAIP2    | 4 |
| TNFSF12-TN | 4 |
| TNNI2      | 4 |
| VENTX      | 4 |
| VNN1       | 4 |
| VOPP1      | 4 |
| ZMYND15    | 4 |
| ABCB1      | 4 |
| ABCG1      | 4 |
| ABLIM1     | 4 |
| ACRBP      | 4 |
| ACSM5      | 4 |
| ADAMTS14   | 4 |
| ADAP1      | 4 |
| ADCY7      | 4 |
| AGMAT      | 4 |
| AIM1       | 4 |
| AIM1L      | 4 |
| ALDH1A1    | 4 |
| ALPK2      | 4 |
| ALPL       | 4 |
| AMZ1       | 4 |
| ANKRD29    | 4 |
| ANKRD35    | 4 |
| ANUBL1     | 4 |
| APOBEC3A   | 4 |
| APOBEC3B   | 4 |
| APOBEC3D   | 4 |
| APOBEC3F   | 4 |
| APOBEC3G   | 4 |
| AQP3       | 4 |
| AQP9       | 4 |
| ARAP2      | 4 |
| ARHGAP22   | 4 |
| ARHGAP4    | 4 |

|           |   |
|-----------|---|
| ARHGEF6   | 4 |
| ARL4C     | 4 |
| ASGR1     | 4 |
| ATG16L2   | 4 |
| ATHL1     | 4 |
| ATP8A1    | 4 |
| AURKC     | 4 |
| BACH2     | 4 |
| BATF3     | 4 |
| BIN1      | 4 |
| BTBD11    | 4 |
| BTG2      | 4 |
| C10orf105 | 4 |
| C11orf45  | 4 |
| C11orf75  | 4 |
| C12orf35  | 4 |
| C14orf72  | 4 |
| C15orf48  | 4 |
| C17orf28  | 4 |
| C17orf44  | 4 |
| C17orf60  | 4 |
| C18orf1   | 4 |
| C19orf59  | 4 |
| C1R       | 4 |
| C1RL      | 4 |
| C1S       | 4 |
| C20orf118 | 4 |
| C20orf197 | 4 |
| C22orf15  | 4 |
| C2orf48   | 4 |
| C2orf89   | 4 |
| C5orf39   | 4 |
| C6orf105  | 4 |
| C6orf27   | 4 |
| C9orf167  | 4 |
| CAPN11    | 4 |
| CARNS1    | 4 |
| CBLN3     | 4 |
| CBX7      | 4 |
| CCBP2     | 4 |
| CCDC109B  | 4 |
| CCDC65    | 4 |
| CCDC81    | 4 |
| CCL7      | 4 |
| CD101     | 4 |
| CD160     | 4 |
| CD207     | 4 |
| CD70      | 4 |
| CDA       | 4 |

|         |   |
|---------|---|
| CDH23   | 4 |
| CDHR1   | 4 |
| CDYL2   | 4 |
| CH25H   | 4 |
| CHRM4   | 4 |
| CITED4  | 4 |
| CLEC4F  | 4 |
| CLEC5A  | 4 |
| CLSTN3  | 4 |
| COLQ    | 4 |
| CPM     | 4 |
| CPT1A   | 4 |
| CRB3    | 4 |
| CRHBP   | 4 |
| CSF2RA  | 4 |
| CSTA    | 4 |
| CTLA4   | 4 |
| CTSC    | 4 |
| CXCL2   | 4 |
| CXCL3   | 4 |
| CXCL5   | 4 |
| CXCR1   | 4 |
| CXCR2   | 4 |
| CYFIP2  | 4 |
| CYP27B1 | 4 |
| CYP4F22 | 4 |
| DAPK2   | 4 |
| DDX26B  | 4 |
| DEGS2   | 4 |
| DGKE    | 4 |
| DHRS3   | 4 |
| DLEC1   | 4 |
| DLEU7   | 4 |
| DOCK11  | 4 |
| DRD4    | 4 |
| DSC2    | 4 |
| EAF2    | 4 |
| EFCAB4A | 4 |
| EIF4E3  | 4 |
| ELL3    | 4 |
| ELMO1   | 4 |
| EMB     | 4 |
| EMR4P   | 4 |
| EPPK1   | 4 |
| ERMN    | 4 |
| ESR1    | 4 |
| ETS2    | 4 |
| F2R     | 4 |
| FAIM2   | 4 |

|          |   |
|----------|---|
| FAM107B  | 4 |
| FAM115C  | 4 |
| FAM167A  | 4 |
| FAM20A   | 4 |
| FAS      | 4 |
| FCGR3B   | 4 |
| FCHSD2   | 4 |
| FCN3     | 4 |
| FFAR2    | 4 |
| FGD6     | 4 |
| FGF1     | 4 |
| FGF11    | 4 |
| FKBP5    | 4 |
| FLJ45445 | 4 |
| FMO2     | 4 |
| FOXP1    | 4 |
| FXYD2    | 4 |
| G0S2     | 4 |
| GADD45G  | 4 |
| GALM     | 4 |
| GALNT6   | 4 |
| GCNT1    | 4 |
| GGT1     | 4 |
| GGT3P    | 4 |
| GGTLC2   | 4 |
| GIPR     | 4 |
| GLRX     | 4 |
| GLT1D1   | 4 |
| GLUL     | 4 |
| GPCPD1   | 4 |
| GPR109A  | 4 |
| GPR109B  | 4 |
| GPR113   | 4 |
| GPR172B  | 4 |
| GPR21    | 4 |
| GPR55    | 4 |
| GPR97    | 4 |
| GRAMD1B  | 4 |
| GRAPL    | 4 |
| GRIK5    | 4 |
| GSDMA    | 4 |
| GSDMC    | 4 |
| HAAO     | 4 |
| HAPLN3   | 4 |
| HGF      | 4 |
| HNMT     | 4 |
| HOPX     | 4 |
| HPSE     | 4 |
| HS3ST3A1 | 4 |

|           |   |
|-----------|---|
| HS3ST3B1  | 4 |
| HTRA4     | 4 |
| ICOSLG    | 4 |
| IKZF2     | 4 |
| IL1B      | 4 |
| IL1R2     | 4 |
| IL1RN     | 4 |
| IL23A     | 4 |
| IL33      | 4 |
| IL6       | 4 |
| IQGAP2    | 4 |
| IQSEC3    | 4 |
| ISG20     | 4 |
| JAK2      | 4 |
| JAKMIP3   | 4 |
| KAL1      | 4 |
| KBTBD8    | 4 |
| KCNE3     | 4 |
| KCNJ5     | 4 |
| KCNMA1    | 4 |
| KCNQ3     | 4 |
| KIAA0040  | 4 |
| KIAA1274  | 4 |
| KIAA1683  | 4 |
| KLF1      | 4 |
| KLRG1     | 4 |
| KMO       | 4 |
| KSR1      | 4 |
| KYNU      | 4 |
| LAMA3     | 4 |
| LBH       | 4 |
| LOC100130 | 4 |
| LOC100132 | 4 |
| LOC100240 | 4 |
| LOC153684 | 4 |
| LOC154761 | 4 |
| LOC283314 | 4 |
| LOC389333 | 4 |
| LOC440461 | 4 |
| LOC643008 | 4 |
| LOC647121 | 4 |
| LOC653786 | 4 |
| LQK1      | 4 |
| LRIG1     | 4 |
| LRRK2     | 4 |
| LYPD3     | 4 |
| MACC1     | 4 |
| MADCAM1   | 4 |
| MAP3K5    | 4 |

|          |   |
|----------|---|
| MARCO    | 4 |
| MATK     | 4 |
| MDGA1    | 4 |
| METTL7A  | 4 |
| MFSD7    | 4 |
| MGAT4A   | 4 |
| MGC12916 | 4 |
| MICB     | 4 |
| MLKL     | 4 |
| MMP12    | 4 |
| MMP9     | 4 |
| MPO      | 4 |
| MSX2P1   | 4 |
| MTTP     | 4 |
| MYB      | 4 |
| MYCL1    | 4 |
| MYO1A    | 4 |
| MYO7A    | 4 |
| NAPSA    | 4 |
| NAT8B    | 4 |
| NEK8     | 4 |
| NEURL3   | 4 |
| NFKBID   | 4 |
| NFKBIZ   | 4 |
| NINJ2    | 4 |
| NMI      | 4 |
| NTRK1    | 4 |
| NUDT16P1 | 4 |
| OTOA     | 4 |
| OXER1    | 4 |
| P2RY12   | 4 |
| P2RY2    | 4 |
| P4HTM    | 4 |
| PARM1    | 4 |
| PARP8    | 4 |
| PDE6B    | 4 |
| PDE7A    | 4 |
| PHF11    | 4 |
| PIK3IP1  | 4 |
| PIPOX    | 4 |
| PKD2L1   | 4 |
| PLB1     | 4 |
| PLBD1    | 4 |
| PLCB2    | 4 |
| PLCXD2   | 4 |
| PLEKHA7  | 4 |
| PPP1R3G  | 4 |
| PRDM8    | 4 |
| PROCA1   | 4 |

|          |   |
|----------|---|
| PTGS2    | 4 |
| PTPLAD2  | 4 |
| PTPRE    | 4 |
| RAB39    | 4 |
| RARRES1  | 4 |
| RASGRP3  | 4 |
| RBM47    | 4 |
| RDH10    | 4 |
| RGL1     | 4 |
| RIMBP3   | 4 |
| RIMBP3C  | 4 |
| RNF112   | 4 |
| RPGRIP1  | 4 |
| RRN3P1   | 4 |
| RRN3P2   | 4 |
| RTN1     | 4 |
| RUNDC2C  | 4 |
| S100A8   | 4 |
| S100A9   | 4 |
| SAMHD1   | 4 |
| SARDH    | 4 |
| SEL1L3   | 4 |
| SEPP1    | 4 |
| 6-Sep    | 4 |
| SFMBT2   | 4 |
| SH3TC1   | 4 |
| SIGLEC12 | 4 |
| SIGLEC15 | 4 |
| SLC16A11 | 4 |
| SLC16A13 | 4 |
| SLC1A3   | 4 |
| SLC22A20 | 4 |
| SLC23A1  | 4 |
| SLC25A45 | 4 |
| SLC2A9   | 4 |
| SLC31A2  | 4 |
| SLC40A1  | 4 |
| SLC46A3  | 4 |
| SLC4A8   | 4 |
| SLC5A5   | 4 |
| SLFN13   | 4 |
| SMPD3    | 4 |
| SOX30    | 4 |
| SQRDL    | 4 |
| STK17B   | 4 |
| STX1B    | 4 |
| STYK1    | 4 |
| SYT15    | 4 |
| TBXAS1   | 4 |

|          |   |
|----------|---|
| TEC      | 4 |
| TGM2     | 4 |
| THEM5    | 4 |
| TIAM1    | 4 |
| TICAM2   | 4 |
| TLR1     | 4 |
| TLR2     | 4 |
| TLR5     | 4 |
| TLR6     | 4 |
| TM6SF1   | 4 |
| TMEM154  | 4 |
| TMPRSS6  | 4 |
| TNFRSF25 | 4 |
| TNFRSF4  | 4 |
| TNFRSF6B | 4 |
| TNFRSF8  | 4 |
| TNFSF11  | 4 |
| TNFSF15  | 4 |
| TNFSF4   | 4 |
| TNS4     | 4 |
| TOX2     | 4 |
| TP53INP1 | 4 |
| TP63     | 4 |
| TPK1     | 4 |
| TPRG1    | 4 |
| TRAF1    | 4 |
| TRAF5    | 4 |
| TREM1    | 4 |
| TREML1   | 4 |
| TRERF1   | 4 |
| TRPC2    | 4 |
| TRPM2    | 4 |
| TSC22D3  | 4 |
| TSPAN33  | 4 |
| TTBK1    | 4 |
| TTC39B   | 4 |
| TTC39C   | 4 |
| TXK      | 4 |
| TXNIP    | 4 |
| VAMP5    | 4 |
| VAMP8    | 4 |
| VAV3     | 4 |
| VIPR2    | 4 |
| VMO1     | 4 |
| WDR66    | 4 |
| WNT9A    | 4 |
| XKRX     | 4 |
| ZC3H12A  | 4 |
| ZNF804A  | 4 |

|         |   |
|---------|---|
| APOL6   | 5 |
| B2M     | 5 |
| BATF2   | 5 |
| BST2    | 5 |
| BTN3A1  | 5 |
| BTN3A2  | 5 |
| BTN3A3  | 5 |
| C5orf56 | 5 |
| CMPK2   | 5 |
| DDX58   | 5 |
| DDX60   | 5 |
| DDX60L  | 5 |
| DTX3L   | 5 |
| HERC5   | 5 |
| HERC6   | 5 |
| HLA-A   | 5 |
| HLA-B   | 5 |
| HLA-C   | 5 |
| HLA-E   | 5 |
| HLA-F   | 5 |
| HLA-H   | 5 |
| HLA-J   | 5 |
| HLA-L   | 5 |
| IFI27   | 5 |
| IFI44   | 5 |
| IFI44L  | 5 |
| IFI6    | 5 |
| IFIH1   | 5 |
| IFIT1   | 5 |
| IFIT2   | 5 |
| IFIT3   | 5 |
| IFITM1  | 5 |
| IFITM2  | 5 |
| IFITM3  | 5 |
| IRF7    | 5 |
| ISG15   | 5 |
| LAP3    | 5 |
| MX1     | 5 |
| NLRC5   | 5 |
| OAS1    | 5 |
| OAS2    | 5 |
| OAS3    | 5 |
| OASL    | 5 |
| PARP12  | 5 |
| PARP14  | 5 |
| PARP9   | 5 |
| PRIC285 | 5 |
| PSMB8   | 5 |
| PSMB9   | 5 |

|          |   |
|----------|---|
| RSAD2    | 5 |
| SAMD9    | 5 |
| SAMD9L   | 5 |
| SERPING1 | 5 |
| STAT1    | 5 |
| TAP1     | 5 |
| TAP2     | 5 |
| TAPBP    | 5 |
| TLR3     | 5 |
| TRIM22   | 5 |
| UBA7     | 5 |
| UBE2L6   | 5 |
| USP18    | 5 |
| WARS     | 5 |
| XAF1     | 5 |

SI table 1c Differentially regulated genes

| Gene      | p-value(cold vs. hot) | qvalue(p-value(cold vs. hot)) | Ratio(cold vs. hot) | Fold-Change(cold vs. hot) | Fold-Change(cold vs. hot) (Description) |
|-----------|-----------------------|-------------------------------|---------------------|---------------------------|-----------------------------------------|
| SYTL5     | 0.000353296           | 0.000716992                   | 3.9397              | <b>3.9397</b>             | cold up vs hot                          |
| NEFM      | 0.000190583           | 0.000413384                   | 3.78381             | <b>3.78381</b>            | cold up vs hot                          |
| FERMT1    | 1.07E-05              | 3.04E-05                      | 3.59365             | <b>3.59365</b>            | cold up vs hot                          |
| FAM184B   | 4.77E-06              | 1.43E-05                      | 3.49316             | <b>3.49316</b>            | cold up vs hot                          |
| DNAH2     | 0.00012082            | 0.000278639                   | 3.48188             | <b>3.48188</b>            | cold up vs hot                          |
| SOX11     | 0.000218221           | 0.000466205                   | 3.30592             | <b>3.30592</b>            | cold up vs hot                          |
| MIPOL1    | 4.84E-11              | 2.43E-10                      | 3.21524             | <b>3.21524</b>            | cold up vs hot                          |
| DLGAP1    | 4.76E-05              | 0.000119775                   | 3.21014             | <b>3.21014</b>            | cold up vs hot                          |
| PCSK2     | 0.00149569            | 0.00253978                    | 3.19959             | <b>3.19959</b>            | cold up vs hot                          |
| EFNB3     | 2.18E-07              | 7.85E-07                      | 3.12068             | <b>3.12068</b>            | cold up vs hot                          |
| SOX2      | 0.00123733            | 0.00215984                    | 3.05983             | <b>3.05983</b>            | cold up vs hot                          |
| ROBO2     | 0.000910857           | 0.00165733                    | 3.03742             | <b>3.03742</b>            | cold up vs hot                          |
| MEX3A     | 1.30E-10              | 6.29E-10                      | 2.95495             | <b>2.95495</b>            | cold up vs hot                          |
| ST8SIA5   | 0.00105409            | 0.0018833                     | 2.93468             | <b>2.93468</b>            | cold up vs hot                          |
| STAC2     | 0.000127856           | 0.00029249                    | 2.86226             | <b>2.86226</b>            | cold up vs hot                          |
| DGKI      | 1.62E-06              | 5.22E-06                      | 2.84233             | <b>2.84233</b>            | cold up vs hot                          |
| ST8SIA2   | 0.00338736            | 0.00512119                    | 2.82561             | <b>2.82561</b>            | cold up vs hot                          |
| CASKIN1   | 5.85E-05              | 0.000144481                   | 2.80787             | <b>2.80787</b>            | cold up vs hot                          |
| FLRT3     | 0.000884589           | 0.00161686                    | 2.80518             | <b>2.80518</b>            | cold up vs hot                          |
| CGREF1    | 1.05E-07              | 3.93E-07                      | 2.75898             | <b>2.75898</b>            | cold up vs hot                          |
| DNAH5     | 0.000116791           | 0.000270496                   | 2.75616             | <b>2.75616</b>            | cold up vs hot                          |
| WNT7B     | 0.00284112            | 0.00440243                    | 2.72518             | <b>2.72518</b>            | cold up vs hot                          |
| PITX2     | 0.000885463           | 0.00161789                    | 2.72289             | <b>2.72289</b>            | cold up vs hot                          |
| PRKAA2    | 0.00160696            | 0.00270312                    | 2.68972             | <b>2.68972</b>            | cold up vs hot                          |
| PRKG1     | 9.31E-08              | 3.49E-07                      | 2.67881             | <b>2.67881</b>            | cold up vs hot                          |
| LPPR5     | 0.00058094            | 0.00111583                    | 2.66343             | <b>2.66343</b>            | cold up vs hot                          |
| APC2      | 6.59E-07              | 2.25E-06                      | 2.6455              | <b>2.6455</b>             | cold up vs hot                          |
| HAPLN4    | 8.58E-05              | 0.000203812                   | 2.64211             | <b>2.64211</b>            | cold up vs hot                          |
| COL25A1   | 9.59E-05              | 0.000225771                   | 2.62426             | <b>2.62426</b>            | cold up vs hot                          |
| PAX9      | 0.000118422           | 0.000273788                   | 2.61921             | <b>2.61921</b>            | cold up vs hot                          |
| MSI1      | 0.00184155            | 0.00303745                    | 2.60369             | <b>2.60369</b>            | cold up vs hot                          |
| SPTBN2    | 6.19E-05              | 0.000151825                   | 2.60312             | <b>2.60312</b>            | cold up vs hot                          |
| TMEM59L   | 0.00122564            | 0.00214173                    | 2.60203             | <b>2.60203</b>            | cold up vs hot                          |
| NDST3     | 0.00207417            | 0.00336585                    | 2.55501             | <b>2.55501</b>            | cold up vs hot                          |
| FOXP2     | 0.000239004           | 0.000504823                   | 2.53931             | <b>2.53931</b>            | cold up vs hot                          |
| FOXF2     | 4.72E-05              | 0.000118802                   | 2.53642             | <b>2.53642</b>            | cold up vs hot                          |
| GRIK2     | 0.00746203            | 0.00990082                    | 2.53339             | <b>2.53339</b>            | cold up vs hot                          |
| NTSR1     | 0.00398609            | 0.00587133                    | 2.5218              | <b>2.5218</b>             | cold up vs hot                          |
| F12       | 6.50E-06              | 1.90E-05                      | 2.5151              | <b>2.5151</b>             | cold up vs hot                          |
| VAT1L     | 0.00056697            | 0.0078532                     | 2.51018             | <b>2.51018</b>            | cold up vs hot                          |
| VSNL1     | 0.000344902           | 0.00070214                    | 2.48492             | <b>2.48492</b>            | cold up vs hot                          |
| CA9       | 0.00386474            | 0.005721                      | 2.47875             | <b>2.47875</b>            | cold up vs hot                          |
| HOXD13    | 0.0052489             | 0.00736252                    | 2.47422             | <b>2.47422</b>            | cold up vs hot                          |
| GDF1      | 1.81E-05              | 4.92E-05                      | 2.46799             | <b>2.46799</b>            | cold up vs hot                          |
| SCUBE3    | 0.00172726            | 0.00287583                    | 2.44804             | <b>2.44804</b>            | cold up vs hot                          |
| GPR98     | 0.00155461            | 0.00262725                    | 2.43757             | <b>2.43757</b>            | cold up vs hot                          |
| FAM86B2   | 2.32E-06              | 7.32E-06                      | 2.42092             | <b>2.42092</b>            | cold up vs hot                          |
| HS6ST2    | 0.00497731            | 0.00705894                    | 2.41384             | <b>2.41384</b>            | cold up vs hot                          |
| B4GALNT4  | 0.00282425            | 0.0043794                     | 2.40389             | <b>2.40389</b>            | cold up vs hot                          |
| CECR2     | 0.000235669           | 0.000498459                   | 2.40218             | <b>2.40218</b>            | cold up vs hot                          |
| DLX2      | 0.00182811            | 0.00302062                    | 2.39194             | <b>2.39194</b>            | cold up vs hot                          |
| RGR       | 9.27E-05              | 0.000218869                   | 2.36127             | <b>2.36127</b>            | cold up vs hot                          |
| GRB14     | 0.00101305            | 0.00181894                    | 2.3423              | <b>2.3423</b>             | cold up vs hot                          |
| FOXL2     | 0.00598085            | 0.00821189                    | 2.34157             | <b>2.34157</b>            | cold up vs hot                          |
| CTXN1     | 1.76E-06              | 5.67E-06                      | 2.32255             | <b>2.32255</b>            | cold up vs hot                          |
| RCOR2     | 0.000223741           | 0.000475508                   | 2.32242             | <b>2.32242</b>            | cold up vs hot                          |
| MSX2      | 2.66E-05              | 7.02E-05                      | 2.31618             | <b>2.31618</b>            | cold up vs hot                          |
| CHRN2     | 0.00104769            | 0.00187289                    | 2.3104              | <b>2.3104</b>             | cold up vs hot                          |
| KCNK2     | 7.87E-05              | 0.000188845                   | 2.30221             | <b>2.30221</b>            | cold up vs hot                          |
| SOX2OT    | 0.00327201            | 0.00497793                    | 2.30048             | <b>2.30048</b>            | cold up vs hot                          |
| KIAA1549  | 0.000305187           | 0.000628345                   | 2.28787             | <b>2.28787</b>            | cold up vs hot                          |
| DKFZp686C | 5.59E-06              | 1.66E-05                      | 2.27941             | <b>2.27941</b>            | cold up vs hot                          |
| SLC6A15   | 0.000240089           | 0.000506622                   | 2.27842             | <b>2.27842</b>            | cold up vs hot                          |
| C5orf38   | 0.00596977            | 0.00820095                    | 2.27335             | <b>2.27335</b>            | cold up vs hot                          |
| GAS2      | 0.000523554           | 0.00102002                    | 2.2219              | <b>2.2219</b>             | cold up vs hot                          |
| JPH1      | 0.003819              | 0.00566485                    | 2.21425             | <b>2.21425</b>            | cold up vs hot                          |
| LOC286467 | 1.11E-06              | 3.66E-06                      | 2.21338             | <b>2.21338</b>            | cold up vs hot                          |
| SYN2      | 0.00150106            | 0.00254731                    | 2.21026             | <b>2.21026</b>            | cold up vs hot                          |
| GRM1      | 0.000860213           | 0.00157977                    | 2.20004             | <b>2.20004</b>            | cold up vs hot                          |
| ESYT3     | 0.000286248           | 0.000594605                   | 2.19993             | <b>2.19993</b>            | cold up vs hot                          |
| NEK5      | 5.02E-07              | 1.74E-06                      | 2.19605             | <b>2.19605</b>            | cold up vs hot                          |
| FOXD1     | 0.00191157            | 0.00313867                    | 2.18712             | <b>2.18712</b>            | cold up vs hot                          |
| CDH15     | 0.00307342            | 0.00471759                    | 2.17891             | <b>2.17891</b>            | cold up vs hot                          |
| FLG       | 0.000482903           | 0.000948293                   | 2.17458             | <b>2.17458</b>            | cold up vs hot                          |
| PALM2     | 0.000295949           | 0.000612027                   | 2.1701              | <b>2.1701</b>             | cold up vs hot                          |

|           |             |             |         |                |                |
|-----------|-------------|-------------|---------|----------------|----------------|
| DDN       | 4.23E-07    | 1.48E-06    | 2.16187 | <b>2.16187</b> | cold up vs hot |
| LOC150197 | 2.81E-05    | 7.36E-05    | 2.15196 | <b>2.15196</b> | cold up vs hot |
| IGSF9     | 0.00327583  | 0.00498108  | 2.15193 | <b>2.15193</b> | cold up vs hot |
| KLF5      | 2.22E-06    | 7.01E-06    | 2.14681 | <b>2.14681</b> | cold up vs hot |
| KCNQ1     | 0.00428561  | 0.00623234  | 2.144   | <b>2.144</b>   | cold up vs hot |
| TM6SF2    | 0.000577025 | 0.00110864  | 2.14338 | <b>2.14338</b> | cold up vs hot |
| RAB3B     | 0.00386663  | 0.0057225   | 2.12791 | <b>2.12791</b> | cold up vs hot |
| LINGO2    | 0.00384805  | 0.00570016  | 2.12333 | <b>2.12333</b> | cold up vs hot |
| ANKRD13B  | 6.66E-14    | 3.85E-13    | 2.12222 | <b>2.12222</b> | cold up vs hot |
| DLX3      | 0.00129301  | 0.00224382  | 2.11943 | <b>2.11943</b> | cold up vs hot |
| DPY19L2P4 | 0.000347832 | 0.000707222 | 2.11802 | <b>2.11802</b> | cold up vs hot |
| IGSF9B    | 0.000671667 | 0.00126808  | 2.11019 | <b>2.11019</b> | cold up vs hot |
| HOXA6     | 0.000105847 | 0.000247167 | 2.09942 | <b>2.09942</b> | cold up vs hot |
| C1orf114  | 0.00626655  | 0.00853678  | 2.09722 | <b>2.09722</b> | cold up vs hot |
| HOXA11AS  | 0.000404506 | 0.000810337 | 2.09188 | <b>2.09188</b> | cold up vs hot |
| PALM3     | 0.00493149  | 0.00701545  | 2.08507 | <b>2.08507</b> | cold up vs hot |
| CAMKV     | 0.00523728  | 0.0073478   | 2.08176 | <b>2.08176</b> | cold up vs hot |
| ICAM5     | 0.00116365  | 0.00205208  | 2.07457 | <b>2.07457</b> | cold up vs hot |
| GJA3      | 0.00341125  | 0.00515372  | 2.0722  | <b>2.0722</b>  | cold up vs hot |
| HOXA11    | 0.0006462   | 0.00122577  | 2.06609 | <b>2.06609</b> | cold up vs hot |
| HERC2P4   | 0.000219549 | 0.000468199 | 2.06333 | <b>2.06333</b> | cold up vs hot |
| ZNF488    | 0.000588098 | 0.00112825  | 2.06081 | <b>2.06081</b> | cold up vs hot |
| NKAIN1    | 0.00277751  | 0.00431616  | 2.05853 | <b>2.05853</b> | cold up vs hot |
| USH2A     | 3.29E-05    | 8.51E-05    | 2.04838 | <b>2.04838</b> | cold up vs hot |
| PPFIA4    | 7.24E-06    | 2.11E-05    | 2.04812 | <b>2.04812</b> | cold up vs hot |
| GDAP1L1   | 0.00146727  | 0.0024984   | 2.03503 | <b>2.03503</b> | cold up vs hot |
| B3GALT1   | 0.00122679  | 0.00214259  | 2.02647 | <b>2.02647</b> | cold up vs hot |
| FAM171A2  | 7.84E-05    | 0.000188238 | 2.02465 | <b>2.02465</b> | cold up vs hot |
| DPYSL4    | 0.00499183  | 0.00707338  | 2.02233 | <b>2.02233</b> | cold up vs hot |
| B4GALNT3  | 0.000864673 | 0.00158657  | 2.02204 | <b>2.02204</b> | cold up vs hot |
| DUSP9     | 0.0043736   | 0.00633771  | 2.02201 | <b>2.02201</b> | cold up vs hot |
| TPRXL     | 0.00164984  | 0.0027674   | 2.01086 | <b>2.01086</b> | cold up vs hot |
| C19orf26  | 8.45E-09    | 3.51E-08    | 2.00346 | <b>2.00346</b> | cold up vs hot |
| KCNA2     | 0.0061299   | 0.00838386  | 1.99706 | <b>1.99706</b> | cold up vs hot |
| MPP4      | 0.00232821  | 0.00371074  | 1.99469 | <b>1.99469</b> | cold up vs hot |
| GPC1      | 0.000166309 | 0.000367449 | 1.98392 | <b>1.98392</b> | cold up vs hot |
| C2orf72   | 0.0051532   | 0.00725479  | 1.98315 | <b>1.98315</b> | cold up vs hot |
| SNX32     | 0.000148808 | 0.000334326 | 1.97928 | <b>1.97928</b> | cold up vs hot |
| RASL10B   | 0.00616175  | 0.00841508  | 1.97885 | <b>1.97885</b> | cold up vs hot |
| ACTN2     | 0.00570062  | 0.0078793   | 1.97144 | <b>1.97144</b> | cold up vs hot |
| SPEG      | 0.00238016  | 0.00377785  | 1.96909 | <b>1.96909</b> | cold up vs hot |
| SMYD1     | 0.000584636 | 0.00112227  | 1.96319 | <b>1.96319</b> | cold up vs hot |
| FOXA1     | 0.00166666  | 0.00278917  | 1.96314 | <b>1.96314</b> | cold up vs hot |
| HOXC10    | 0.00365204  | 0.00546063  | 1.96187 | <b>1.96187</b> | cold up vs hot |
| HOMER1    | 1.70E-06    | 5.48E-06    | 1.9512  | <b>1.9512</b>  | cold up vs hot |
| ESM1      | 0.000314845 | 0.000646802 | 1.9489  | <b>1.9489</b>  | cold up vs hot |
| TTPA      | 0.00118879  | 0.00208627  | 1.94554 | <b>1.94554</b> | cold up vs hot |
| IRX3      | 9.58E-05    | 0.000225517 | 1.93215 | <b>1.93215</b> | cold up vs hot |
| RPL21     | 7.51E-05    | 0.000181143 | 1.92293 | <b>1.92293</b> | cold up vs hot |
| SLC10A4   | 0.00441741  | 0.00638984  | 1.92102 | <b>1.92102</b> | cold up vs hot |
| PDE4C     | 0.0038176   | 0.00566406  | 1.91684 | <b>1.91684</b> | cold up vs hot |
| PNMA6A    | 0.00483469  | 0.00689865  | 1.91227 | <b>1.91227</b> | cold up vs hot |
| PIP5KL1   | 1.49E-05    | 4.12E-05    | 1.90982 | <b>1.90982</b> | cold up vs hot |
| PNCK      | 0.00146322  | 0.00249345  | 1.89991 | <b>1.89991</b> | cold up vs hot |
| STK32B    | 0.000434945 | 0.000865411 | 1.89785 | <b>1.89785</b> | cold up vs hot |
| SHC2      | 0.00307432  | 0.00471786  | 1.891   | <b>1.891</b>   | cold up vs hot |
| NLGN1     | 0.00336057  | 0.00508657  | 1.88412 | <b>1.88412</b> | cold up vs hot |
| VTCN1     | 0.00110122  | 0.00195946  | 1.88358 | <b>1.88358</b> | cold up vs hot |
| ENKUR     | 0.000454096 | 0.000899191 | 1.87656 | <b>1.87656</b> | cold up vs hot |
| LASS1     | 0.000432293 | 0.00086098  | 1.87546 | <b>1.87546</b> | cold up vs hot |
| STEAP1    | 3.46E-06    | 1.06E-05    | 1.86711 | <b>1.86711</b> | cold up vs hot |
| SOX5      | 2.97E-06    | 9.21E-06    | 1.86704 | <b>1.86704</b> | cold up vs hot |
| COL24A1   | 0.00500672  | 0.00708679  | 1.8628  | <b>1.8628</b>  | cold up vs hot |
| RAC3      | 1.55E-05    | 4.26E-05    | 1.8624  | <b>1.8624</b>  | cold up vs hot |
| NXPH4     | 0.00329229  | 0.00500411  | 1.86097 | <b>1.86097</b> | cold up vs hot |
| B3GNT4    | 0.000165553 | 0.000366236 | 1.85754 | <b>1.85754</b> | cold up vs hot |
| RPSAP52   | 0.00715153  | 0.00956993  | 1.85526 | <b>1.85526</b> | cold up vs hot |
| MYH15     | 0.00349091  | 0.00525684  | 1.85389 | <b>1.85389</b> | cold up vs hot |
| CBX2      | 3.50E-05    | 8.99E-05    | 1.8535  | <b>1.8535</b>  | cold up vs hot |
| RGS17     | 0.00571618  | 0.00789579  | 1.85208 | <b>1.85208</b> | cold up vs hot |
| SLC4A3    | 0.00373595  | 0.00556272  | 1.84855 | <b>1.84855</b> | cold up vs hot |
| SAMD5     | 0.0028341   | 0.00439364  | 1.84708 | <b>1.84708</b> | cold up vs hot |
| TPTE2P1   | 0.00106491  | 0.00190055  | 1.84643 | <b>1.84643</b> | cold up vs hot |
| TACC2     | 0.000618646 | 0.001182    | 1.84463 | <b>1.84463</b> | cold up vs hot |
| HSD11B1L  | 5.41E-12    | 2.86E-11    | 1.83596 | <b>1.83596</b> | cold up vs hot |
| ACCN2     | 0.00028757  | 0.000596971 | 1.83311 | <b>1.83311</b> | cold up vs hot |
| PTPRS     | 5.14E-07    | 1.77E-06    | 1.83137 | <b>1.83137</b> | cold up vs hot |

|           |             |             |         |                |                |
|-----------|-------------|-------------|---------|----------------|----------------|
| IGLON5    | 0.00495739  | 0.00704366  | 1.83111 | <b>1.83111</b> | cold up vs hot |
| ZBTB8B    | 0.00609963  | 0.00834946  | 1.82856 | <b>1.82856</b> | cold up vs hot |
| C1orf229  | 0.000536846 | 0.00104265  | 1.81346 | <b>1.81346</b> | cold up vs hot |
| DIRAS1    | 9.96E-05    | 0.000233539 | 1.81175 | <b>1.81175</b> | cold up vs hot |
| GPSM1     | 9.12E-08    | 3.43E-07    | 1.81063 | <b>1.81063</b> | cold up vs hot |
| ACAN      | 0.00705917  | 0.00946249  | 1.80701 | <b>1.80701</b> | cold up vs hot |
| GCSH      | 2.57E-06    | 8.04E-06    | 1.80668 | <b>1.80668</b> | cold up vs hot |
| ZNF697    | 4.30E-07    | 1.50E-06    | 1.80058 | <b>1.80058</b> | cold up vs hot |
| GLT25D2   | 0.000536293 | 0.00104204  | 1.79797 | <b>1.79797</b> | cold up vs hot |
| HIST3H2A  | 2.01E-05    | 5.43E-05    | 1.79582 | <b>1.79582</b> | cold up vs hot |
| LOC100130 | 2.81E-05    | 7.36E-05    | 1.78799 | <b>1.78799</b> | cold up vs hot |
| MGC87042  | 0.00163093  | 0.00273973  | 1.77515 | <b>1.77515</b> | cold up vs hot |
| LOC100270 | 3.74E-05    | 9.58E-05    | 1.76816 | <b>1.76816</b> | cold up vs hot |
| SIM2      | 0.00215271  | 0.00347686  | 1.76665 | <b>1.76665</b> | cold up vs hot |
| SCML2     | 0.00251188  | 0.00395326  | 1.766   | <b>1.766</b>   | cold up vs hot |
| LINGO1    | 0.00316053  | 0.00483652  | 1.76515 | <b>1.76515</b> | cold up vs hot |
| RNF144A   | 3.42E-10    | 1.61E-09    | 1.76006 | <b>1.76006</b> | cold up vs hot |
| CCNB1P1   | 1.84E-11    | 9.48E-11    | 1.75934 | <b>1.75934</b> | cold up vs hot |
| C7orf41   | 2.47E-05    | 6.55E-05    | 1.75765 | <b>1.75765</b> | cold up vs hot |
| PTK7      | 0.00011129  | 0.000258305 | 1.75679 | <b>1.75679</b> | cold up vs hot |
| DYNC2H1   | 1.75E-07    | 6.39E-07    | 1.75298 | <b>1.75298</b> | cold up vs hot |
| C10orf47  | 0.000258366 | 0.000541685 | 1.7522  | <b>1.7522</b>  | cold up vs hot |
| TMEM233   | 0.00277299  | 0.0043112   | 1.7518  | <b>1.7518</b>  | cold up vs hot |
| C13orf38  | 0.0068784   | 0.00926202  | 1.74551 | <b>1.74551</b> | cold up vs hot |
| TET1      | 4.18E-06    | 1.27E-05    | 1.74525 | <b>1.74525</b> | cold up vs hot |
| C4orf47   | 0.000290384 | 0.000601855 | 1.74427 | <b>1.74427</b> | cold up vs hot |
| GPR125    | 2.98E-11    | 1.52E-10    | 1.7425  | <b>1.7425</b>  | cold up vs hot |
| EFNA3     | 3.27E-05    | 8.46E-05    | 1.73983 | <b>1.73983</b> | cold up vs hot |
| ADAM32    | 0.00640797  | 0.00871124  | 1.7359  | <b>1.7359</b>  | cold up vs hot |
| VEGFA     | 3.94E-05    | 0.000100552 | 1.73575 | <b>1.73575</b> | cold up vs hot |
| KDEL1     | 2.09E-06    | 6.65E-06    | 1.73389 | <b>1.73389</b> | cold up vs hot |
| NCRNA001  | 3.41E-10    | 1.61E-09    | 1.72921 | <b>1.72921</b> | cold up vs hot |
| FAM57B    | 0.00495973  | 0.00704366  | 1.7264  | <b>1.7264</b>  | cold up vs hot |
| LOC646851 | 6.59E-05    | 0.000161038 | 1.72337 | <b>1.72337</b> | cold up vs hot |
| GRM8      | 0.00262575  | 0.00410477  | 1.71945 | <b>1.71945</b> | cold up vs hot |
| FKBP7     | 2.18E-08    | 8.67E-08    | 1.71724 | <b>1.71724</b> | cold up vs hot |
| AADAT     | 0.000252429 | 0.00053043  | 1.71605 | <b>1.71605</b> | cold up vs hot |
| KLHL23    | 0.000393889 | 0.000790523 | 1.71144 | <b>1.71144</b> | cold up vs hot |
| VN1R1     | 0.000119461 | 0.000275799 | 1.7048  | <b>1.7048</b>  | cold up vs hot |
| FLJ22536  | 0.000656161 | 0.00124168  | 1.70186 | <b>1.70186</b> | cold up vs hot |
| MPP6      | 0.000340115 | 0.000693239 | 1.7003  | <b>1.7003</b>  | cold up vs hot |
| SLC29A4   | 0.00698915  | 0.00937826  | 1.69957 | <b>1.69957</b> | cold up vs hot |
| DACT3     | 0.00204136  | 0.00332334  | 1.69956 | <b>1.69956</b> | cold up vs hot |
| RPL9      | 0.00370206  | 0.00552025  | 1.69704 | <b>1.69704</b> | cold up vs hot |
| CCDC144B  | 0.00155978  | 0.00263461  | 1.69507 | <b>1.69507</b> | cold up vs hot |
| JAM3      | 0.00141808  | 0.0024254   | 1.69479 | <b>1.69479</b> | cold up vs hot |
| RNF39     | 0.000249668 | 0.000525307 | 1.69328 | <b>1.69328</b> | cold up vs hot |
| PGAP1     | 4.34E-05    | 0.000110107 | 1.69198 | <b>1.69198</b> | cold up vs hot |
| LRP3      | 0.00411219  | 0.0060231   | 1.6917  | <b>1.6917</b>  | cold up vs hot |
| SEPT5     | 0.000407676 | 0.000815936 | 1.69133 | <b>1.69133</b> | cold up vs hot |
| RTN4RL2   | 0.00030501  | 0.000628345 | 1.6905  | <b>1.6905</b>  | cold up vs hot |
| NT5DC2    | 7.75E-09    | 3.24E-08    | 1.68908 | <b>1.68908</b> | cold up vs hot |
| GPR156    | 0.00422187  | 0.00615198  | 1.68817 | <b>1.68817</b> | cold up vs hot |
| SLC6A10P  | 0.00314852  | 0.00482265  | 1.68741 | <b>1.68741</b> | cold up vs hot |
| CHRNA5    | 1.24E-05    | 3.47E-05    | 1.68693 | <b>1.68693</b> | cold up vs hot |
| ZNF214    | 0.00702107  | 0.00941722  | 1.68557 | <b>1.68557</b> | cold up vs hot |
| LOC374491 | 0.00205363  | 0.00333833  | 1.68378 | <b>1.68378</b> | cold up vs hot |
| HOXB5     | 0.007246    | 0.00966331  | 1.6837  | <b>1.6837</b>  | cold up vs hot |
| SLC19A1   | 2.83E-08    | 1.12E-07    | 1.68275 | <b>1.68275</b> | cold up vs hot |
| DPF1      | 0.00193037  | 0.00316476  | 1.67855 | <b>1.67855</b> | cold up vs hot |
| SOCS7     | 1.45E-08    | 5.92E-08    | 1.67534 | <b>1.67534</b> | cold up vs hot |
| FBXO17    | 0.00114023  | 0.00201669  | 1.6698  | <b>1.6698</b>  | cold up vs hot |
| AMOTL1    | 2.96E-06    | 9.19E-06    | 1.66848 | <b>1.66848</b> | cold up vs hot |
| C17orf104 | 2.52E-05    | 6.69E-05    | 1.66702 | <b>1.66702</b> | cold up vs hot |
| ASTN2     | 0.000502865 | 0.000982645 | 1.66561 | <b>1.66561</b> | cold up vs hot |
| DAGLA     | 0.000650728 | 0.00123247  | 1.663   | <b>1.663</b>   | cold up vs hot |
| ANKRD7    | 0.00281292  | 0.00436392  | 1.66175 | <b>1.66175</b> | cold up vs hot |
| SH2D5     | 0.00615315  | 0.00841039  | 1.66101 | <b>1.66101</b> | cold up vs hot |
| C8orf45   | 2.03E-05    | 5.47E-05    | 1.65748 | <b>1.65748</b> | cold up vs hot |
| MYC       | 1.08E-06    | 3.57E-06    | 1.65104 | <b>1.65104</b> | cold up vs hot |
| KIAA1715  | 5.20E-08    | 2.01E-07    | 1.65076 | <b>1.65076</b> | cold up vs hot |
| DNAH14    | 1.92E-06    | 6.14E-06    | 1.65035 | <b>1.65035</b> | cold up vs hot |
| PAR5      | 0.00390375  | 0.00577084  | 1.64276 | <b>1.64276</b> | cold up vs hot |
| STX1A     | 2.21E-05    | 5.93E-05    | 1.64234 | <b>1.64234</b> | cold up vs hot |
| CECR4     | 0.000139628 | 0.000316097 | 1.64106 | <b>1.64106</b> | cold up vs hot |
| AFARP1    | 2.75E-05    | 7.22E-05    | 1.64037 | <b>1.64037</b> | cold up vs hot |
| SLC39A10  | 6.77E-08    | 2.59E-07    | 1.63869 | <b>1.63869</b> | cold up vs hot |

|           |             |             |         |                |                |
|-----------|-------------|-------------|---------|----------------|----------------|
| IL17RD    | 0.00681958  | 0.009198    | 1.63808 | <b>1.63808</b> | cold up vs hot |
| GASS      | 5.54E-06    | 1.64E-05    | 1.63697 | <b>1.63697</b> | cold up vs hot |
| CHML      | 0.000142046 | 0.000321125 | 1.62986 | <b>1.62986</b> | cold up vs hot |
| PLEKHG4   | 5.90E-05    | 0.000145425 | 1.62606 | <b>1.62606</b> | cold up vs hot |
| C2orf77   | 2.78E-05    | 7.30E-05    | 1.62595 | <b>1.62595</b> | cold up vs hot |
| UCKL1AS   | 4.55E-05    | 0.00011501  | 1.62559 | <b>1.62559</b> | cold up vs hot |
| CHD5      | 0.00178503  | 0.00295503  | 1.62024 | <b>1.62024</b> | cold up vs hot |
| C14orf33  | 3.40E-11    | 1.72E-10    | 1.61978 | <b>1.61978</b> | cold up vs hot |
| SLC10A5   | 9.69E-05    | 0.000227783 | 1.61942 | <b>1.61942</b> | cold up vs hot |
| PRAME     | 0.00131634  | 0.00228067  | 1.61849 | <b>1.61849</b> | cold up vs hot |
| KIAA0802  | 0.00206604  | 0.00335636  | 1.61346 | <b>1.61346</b> | cold up vs hot |
| FAM78B    | 0.000435048 | 0.000865411 | 1.61271 | <b>1.61271</b> | cold up vs hot |
| IMPDH2    | 1.45E-10    | 7.04E-10    | 1.61213 | <b>1.61213</b> | cold up vs hot |
| CMTM4     | 3.51E-08    | 1.37E-07    | 1.61183 | <b>1.61183</b> | cold up vs hot |
| CC2D2A    | 2.04E-09    | 8.98E-09    | 1.61059 | <b>1.61059</b> | cold up vs hot |
| SOCS2     | 6.73E-05    | 0.000163884 | 1.60985 | <b>1.60985</b> | cold up vs hot |
| FNDC8     | 1.74E-06    | 5.58E-06    | 1.60979 | <b>1.60979</b> | cold up vs hot |
| WLS       | 0.000634317 | 0.00120699  | 1.60813 | <b>1.60813</b> | cold up vs hot |
| LOC642852 | 6.09E-08    | 2.33E-07    | 1.60625 | <b>1.60625</b> | cold up vs hot |
| RYS3      | 0.00270557  | 0.00421843  | 1.60509 | <b>1.60509</b> | cold up vs hot |
| MEX3D     | 3.53E-09    | 1.52E-08    | 1.60363 | <b>1.60363</b> | cold up vs hot |
| AGAP1     | 1.99E-10    | 9.53E-10    | 1.60324 | <b>1.60324</b> | cold up vs hot |
| VPS37D    | 0.00140623  | 0.00241019  | 1.60281 | <b>1.60281</b> | cold up vs hot |
| MYADML2   | 0.00219541  | 0.00353568  | 1.60119 | <b>1.60119</b> | cold up vs hot |
| BOP1      | 5.87E-06    | 1.73E-05    | 1.59605 | <b>1.59605</b> | cold up vs hot |
| MCM3APA5  | 1.53E-06    | 4.95E-06    | 1.59466 | <b>1.59466</b> | cold up vs hot |
| WASF1     | 8.68E-07    | 2.91E-06    | 1.59382 | <b>1.59382</b> | cold up vs hot |
| ARHGAP32  | 2.03E-07    | 7.36E-07    | 1.59379 | <b>1.59379</b> | cold up vs hot |
| ADORA2B   | 0.00517077  | 0.00726855  | 1.58772 | <b>1.58772</b> | cold up vs hot |
| C14orf128 | 5.11E-06    | 1.52E-05    | 1.58768 | <b>1.58768</b> | cold up vs hot |
| ZRANB3    | 9.93E-06    | 2.83E-05    | 1.5871  | <b>1.5871</b>  | cold up vs hot |
| ZNF749    | 0.000184151 | 0.000400498 | 1.58701 | <b>1.58701</b> | cold up vs hot |
| IRX5      | 0.00169518  | 0.00283037  | 1.5858  | <b>1.5858</b>  | cold up vs hot |
| MAPK8IP1  | 0.00143076  | 0.00244644  | 1.58576 | <b>1.58576</b> | cold up vs hot |
| C6orf124  | 0.00695776  | 0.00934383  | 1.58528 | <b>1.58528</b> | cold up vs hot |
| DOCK6     | 2.76E-09    | 1.20E-08    | 1.58104 | <b>1.58104</b> | cold up vs hot |
| CNIH2     | 0.00225578  | 0.00361471  | 1.58085 | <b>1.58085</b> | cold up vs hot |
| UBE2Q2P2  | 0.000166044 | 0.000366988 | 1.58058 | <b>1.58058</b> | cold up vs hot |
| SLC25A15  | 3.06E-11    | 1.55E-10    | 1.57915 | <b>1.57915</b> | cold up vs hot |
| GAS2L3    | 0.000574845 | 0.00110575  | 1.57865 | <b>1.57865</b> | cold up vs hot |
| RSPH10B2  | 0.00292505  | 0.00451879  | 1.57855 | <b>1.57855</b> | cold up vs hot |
| ZNF74     | 3.11E-12    | 1.67E-11    | 1.57824 | <b>1.57824</b> | cold up vs hot |
| ANO7      | 7.23E-05    | 0.000175127 | 1.57807 | <b>1.57807</b> | cold up vs hot |
| SOX15     | 0.00166385  | 0.00278518  | 1.57776 | <b>1.57776</b> | cold up vs hot |
| C5orf13   | 0.00598403  | 0.00821189  | 1.5765  | <b>1.5765</b>  | cold up vs hot |
| TLN2      | 4.89E-08    | 1.89E-07    | 1.57637 | <b>1.57637</b> | cold up vs hot |
| PRKD1     | 1.31E-06    | 4.28E-06    | 1.57572 | <b>1.57572</b> | cold up vs hot |
| SGK196    | 4.63E-05    | 0.00011675  | 1.57482 | <b>1.57482</b> | cold up vs hot |
| PVRL1     | 2.14E-07    | 7.70E-07    | 1.57382 | <b>1.57382</b> | cold up vs hot |
| SLC43A1   | 7.03E-05    | 0.000170723 | 1.57351 | <b>1.57351</b> | cold up vs hot |
| FAM86B1   | 0.000949394 | 0.00171883  | 1.57336 | <b>1.57336</b> | cold up vs hot |
| C12orf24  | 3.09E-06    | 9.57E-06    | 1.57226 | <b>1.57226</b> | cold up vs hot |
| CCDC78    | 0.00118559  | 0.00208156  | 1.57079 | <b>1.57079</b> | cold up vs hot |
| MEX3B     | 0.000290719 | 0.000602357 | 1.56947 | <b>1.56947</b> | cold up vs hot |
| WWTR1     | 0.000560458 | 0.00108223  | 1.56901 | <b>1.56901</b> | cold up vs hot |
| C22orf36  | 0.00195306  | 0.00319873  | 1.56722 | <b>1.56722</b> | cold up vs hot |
| BSG       | 8.34E-09    | 3.46E-08    | 1.56562 | <b>1.56562</b> | cold up vs hot |
| ARHGAP39  | 1.53E-05    | 4.21E-05    | 1.56534 | <b>1.56534</b> | cold up vs hot |
| UGGT2     | 8.58E-08    | 3.24E-07    | 1.56357 | <b>1.56357</b> | cold up vs hot |
| LRP5      | 0.00721538  | 0.00963035  | 1.56287 | <b>1.56287</b> | cold up vs hot |
| SNORD116  | 0.00291267  | 0.00450368  | 1.56259 | <b>1.56259</b> | cold up vs hot |
| RGAG1     | 0.00695399  | 0.0093422   | 1.5622  | <b>1.5622</b>  | cold up vs hot |
| LOC400931 | 0.00403848  | 0.00592709  | 1.56204 | <b>1.56204</b> | cold up vs hot |
| ZNF121    | 9.63E-07    | 3.22E-06    | 1.56159 | <b>1.56159</b> | cold up vs hot |
| ARL10     | 0.00470987  | 0.00675005  | 1.5615  | <b>1.5615</b>  | cold up vs hot |
| RAB3A     | 3.00E-05    | 7.81E-05    | 1.56128 | <b>1.56128</b> | cold up vs hot |
| NCRNA001  | 0.000109539 | 0.000254602 | 1.55887 | <b>1.55887</b> | cold up vs hot |
| HPDL      | 0.00708631  | 0.00949301  | 1.55494 | <b>1.55494</b> | cold up vs hot |
| HCG2P7    | 0.00184002  | 0.00303706  | 1.55407 | <b>1.55407</b> | cold up vs hot |
| ZBTB12    | 3.02E-06    | 9.34E-06    | 1.55326 | <b>1.55326</b> | cold up vs hot |
| EEF2      | 3.57E-10    | 1.68E-09    | 1.55316 | <b>1.55316</b> | cold up vs hot |
| RPGRIP1L  | 3.81E-07    | 1.34E-06    | 1.55167 | <b>1.55167</b> | cold up vs hot |
| RNF152    | 0.00268528  | 0.00419209  | 1.55115 | <b>1.55115</b> | cold up vs hot |
| CCDC148   | 0.00339132  | 0.00512598  | 1.55049 | <b>1.55049</b> | cold up vs hot |
| IPO4      | 1.08E-10    | 5.28E-10    | 1.54943 | <b>1.54943</b> | cold up vs hot |
| ATP7B     | 0.000165251 | 0.000365855 | 1.54777 | <b>1.54777</b> | cold up vs hot |
| HILS1     | 0.00372911  | 0.00555677  | 1.54558 | <b>1.54558</b> | cold up vs hot |

|           |             |             |         |                |                |
|-----------|-------------|-------------|---------|----------------|----------------|
| LOC645166 | 0.000640346 | 0.00121633  | 1.54538 | <b>1.54538</b> | cold up vs hot |
| AKR7L     | 7.29E-05    | 0.000176446 | 1.54518 | <b>1.54518</b> | cold up vs hot |
| MDH1B     | 0.00246782  | 0.00389425  | 1.54471 | <b>1.54471</b> | cold up vs hot |
| LRFN4     | 0.000528812 | 0.00102919  | 1.54316 | <b>1.54316</b> | cold up vs hot |
| HOXD3     | 0.00684594  | 0.00922593  | 1.54306 | <b>1.54306</b> | cold up vs hot |
| CHST5     | 0.00189837  | 0.00311855  | 1.54131 | <b>1.54131</b> | cold up vs hot |
| FARP1     | 1.38E-05    | 3.83E-05    | 1.54102 | <b>1.54102</b> | cold up vs hot |
| ATF3      | 0.00103542  | 0.000532625 | 1.64974 | <b>1.53908</b> | cold up vs hot |
| FBXW9     | 3.42E-08    | 1.34E-07    | 1.53898 | <b>1.53898</b> | cold up vs hot |
| SCARF2    | 0.00099855  | 0.00179687  | 1.53884 | <b>1.53884</b> | cold up vs hot |
| SLC16A1   | 8.49E-10    | 3.86E-09    | 1.53862 | <b>1.53862</b> | cold up vs hot |
| IQGAP3    | 2.78E-05    | 7.28E-05    | 1.5346  | <b>1.5346</b>  | cold up vs hot |
| KIAA0754  | 0.000839613 | 0.00154624  | 1.53346 | <b>1.53346</b> | cold up vs hot |
| LOC388152 | 1.32E-05    | 3.69E-05    | 1.53313 | <b>1.53313</b> | cold up vs hot |
| DLEU1     | 1.72E-08    | 6.96E-08    | 1.53308 | <b>1.53308</b> | cold up vs hot |
| RASSF8    | 0.000121571 | 0.000280075 | 1.53174 | <b>1.53174</b> | cold up vs hot |
| LOC100128 | 0.000627561 | 0.00119588  | 1.52953 | <b>1.52953</b> | cold up vs hot |
| OTUB2     | 5.45E-05    | 0.000135381 | 1.52949 | <b>1.52949</b> | cold up vs hot |
| SNAI2     | 0.00383842  | 0.00568978  | 1.52872 | <b>1.52872</b> | cold up vs hot |
| HYAL3     | 1.34E-05    | 3.73E-05    | 1.52806 | <b>1.52806</b> | cold up vs hot |
| CDON      | 0.000117103 | 0.000271025 | 1.52523 | <b>1.52523</b> | cold up vs hot |
| ADCY6     | 8.73E-06    | 2.52E-05    | 1.52468 | <b>1.52468</b> | cold up vs hot |
| TAS2R5    | 0.00572211  | 0.00790231  | 1.52329 | <b>1.52329</b> | cold up vs hot |
| HSF2BP    | 0.00015899  | 0.000354233 | 1.52207 | <b>1.52207</b> | cold up vs hot |
| ELOVL6    | 0.000550606 | 0.00106604  | 1.52179 | <b>1.52179</b> | cold up vs hot |
| C14orf176 | 0.000336392 | 0.000686958 | 1.52055 | <b>1.52055</b> | cold up vs hot |
| LRP12     | 7.29E-05    | 0.000176537 | 1.5195  | <b>1.5195</b>  | cold up vs hot |
| C11orf95  | 2.19E-07    | 7.89E-07    | 1.51918 | <b>1.51918</b> | cold up vs hot |
| BZW2      | 4.04E-08    | 1.57E-07    | 1.51748 | <b>1.51748</b> | cold up vs hot |
| PSIMCT-1  | 2.12E-06    | 6.73E-06    | 1.51544 | <b>1.51544</b> | cold up vs hot |
| HOXD8     | 2.72E-05    | 7.17E-05    | 1.51526 | <b>1.51526</b> | cold up vs hot |
| NCRNA002  | 7.50E-05    | 0.000180995 | 1.51467 | <b>1.51467</b> | cold up vs hot |
| FAM57A    | 5.79E-06    | 1.71E-05    | 1.51326 | <b>1.51326</b> | cold up vs hot |
| RAB40A    | 7.67E-05    | 0.000184468 | 1.5132  | <b>1.5132</b>  | cold up vs hot |
| TRIM45    | 3.99E-05    | 0.000101755 | 1.5089  | <b>1.5089</b>  | cold up vs hot |
| MPP3      | 0.00457474  | 0.00658385  | 1.50551 | <b>1.50551</b> | cold up vs hot |
| PTPN14    | 6.48E-06    | 1.90E-05    | 1.50549 | <b>1.50549</b> | cold up vs hot |
| HSPA12A   | 0.00376217  | 0.00559581  | 1.5051  | <b>1.5051</b>  | cold up vs hot |
| TMEM97    | 2.76E-06    | 8.62E-06    | 1.50408 | <b>1.50408</b> | cold up vs hot |
| SLC9A5    | 0.00543649  | 0.00758489  | 1.50348 | <b>1.50348</b> | cold up vs hot |
| LRP6      | 7.18E-07    | 2.44E-06    | 1.50267 | <b>1.50267</b> | cold up vs hot |
| WDR3      | 5.54E-08    | 2.13E-07    | 1.50228 | <b>1.50228</b> | cold up vs hot |
| EEF1DP3   | 0.00140812  | 0.00241216  | 1.50151 | <b>1.50151</b> | cold up vs hot |
| SOX4      | 0.000129001 | 0.000294696 | 1.50079 | <b>1.50079</b> | cold up vs hot |
| RAB40A    | 0.000294465 | 0.000609538 | 1.49897 | <b>1.49897</b> | cold up vs hot |
| FAT1      | 0.000598901 | 0.00114763  | 1.49891 | <b>1.49891</b> | cold up vs hot |
| IRS2      | 1.34E-05    | 3.72E-05    | 1.49863 | <b>1.49863</b> | cold up vs hot |
| TMEM231   | 3.02E-07    | 1.07E-06    | 1.49798 | <b>1.49798</b> | cold up vs hot |
| KCTD15    | 1.57E-10    | 7.59E-10    | 1.4961  | <b>1.4961</b>  | cold up vs hot |
| KCNJ14    | 1.78E-05    | 4.85E-05    | 1.49541 | <b>1.49541</b> | cold up vs hot |
| ETV3      | 6.44E-05    | 0.000157602 | 1.49489 | <b>1.49489</b> | cold up vs hot |
| POMT2     | 2.22E-10    | 1.06E-09    | 1.49356 | <b>1.49356</b> | cold up vs hot |
| MAP1D     | 3.37E-07    | 1.19E-06    | 1.49194 | <b>1.49194</b> | cold up vs hot |
| C14orf79  | 2.72E-10    | 1.29E-09    | 1.49093 | <b>1.49093</b> | cold up vs hot |
| CCDC138   | 0.000960442 | 0.00173787  | 1.48914 | <b>1.48914</b> | cold up vs hot |
| JAG1      | 0.00212203  | 0.00343496  | 1.48841 | <b>1.48841</b> | cold up vs hot |
| JRK       | 9.79E-06    | 2.79E-05    | 1.48801 | <b>1.48801</b> | cold up vs hot |
| LTBP4     | 0.000310927 | 0.000639558 | 1.48777 | <b>1.48777</b> | cold up vs hot |
| ZC3HAV1L  | 0.00366228  | 0.00547343  | 1.48582 | <b>1.48582</b> | cold up vs hot |
| FKBP14    | 5.60E-05    | 0.000138747 | 1.48482 | <b>1.48482</b> | cold up vs hot |
| C22orf23  | 3.60E-10    | 1.69E-09    | 1.48461 | <b>1.48461</b> | cold up vs hot |
| SERPINH1  | 4.93E-05    | 0.000123656 | 1.48413 | <b>1.48413</b> | cold up vs hot |
| LPHN1     | 0.000450245 | 0.00089292  | 1.48304 | <b>1.48304</b> | cold up vs hot |
| RBM9      | 9.17E-09    | 3.79E-08    | 1.48288 | <b>1.48288</b> | cold up vs hot |
| NR2F6     | 1.35E-08    | 5.52E-08    | 1.48151 | <b>1.48151</b> | cold up vs hot |
| TANC2     | 0.00135641  | 0.00233769  | 1.4809  | <b>1.4809</b>  | cold up vs hot |
| WDR35     | 8.34E-08    | 3.15E-07    | 1.48069 | <b>1.48069</b> | cold up vs hot |
| TIMM13    | 5.65E-09    | 2.40E-08    | 1.4805  | <b>1.4805</b>  | cold up vs hot |
| LOC643677 | 0.00520844  | 0.00731206  | 1.47988 | <b>1.47988</b> | cold up vs hot |
| TEAD1     | 1.67E-06    | 5.37E-06    | 1.47936 | <b>1.47936</b> | cold up vs hot |
| SAMD13    | 0.00454909  | 0.00655128  | 1.4783  | <b>1.4783</b>  | cold up vs hot |
| EXTL2     | 8.92E-07    | 2.98E-06    | 1.47801 | <b>1.47801</b> | cold up vs hot |
| TMTC4     | 3.64E-07    | 1.28E-06    | 1.4775  | <b>1.4775</b>  | cold up vs hot |
| SNHG7     | 0.000199246 | 0.000430172 | 1.47746 | <b>1.47746</b> | cold up vs hot |
| CFLP1     | 0.00215097  | 0.00347492  | 1.4774  | <b>1.4774</b>  | cold up vs hot |
| SNHG8     | 2.42E-06    | 7.60E-06    | 1.47715 | <b>1.47715</b> | cold up vs hot |
| KBTBD6    | 9.27E-08    | 3.48E-07    | 1.47427 | <b>1.47427</b> | cold up vs hot |

|           |             |             |         |                |                |
|-----------|-------------|-------------|---------|----------------|----------------|
| CHST10    | 9.73E-07    | 3.24E-06    | 1.47419 | <b>1.47419</b> | cold up vs hot |
| DPY19L3   | 6.81E-05    | 0.000165803 | 1.47364 | <b>1.47364</b> | cold up vs hot |
| SATB2     | 0.00125412  | 0.00218448  | 1.47338 | <b>1.47338</b> | cold up vs hot |
| PANK1     | 2.00E-05    | 5.41E-05    | 1.47247 | <b>1.47247</b> | cold up vs hot |
| FBXL2     | 0.000129418 | 0.000295545 | 1.47243 | <b>1.47243</b> | cold up vs hot |
| SOX12     | 5.06E-07    | 1.75E-06    | 1.47221 | <b>1.47221</b> | cold up vs hot |
| FRMD6     | 0.000616632 | 0.00117884  | 1.47205 | <b>1.47205</b> | cold up vs hot |
| SACS      | 5.91E-05    | 0.000145706 | 1.47122 | <b>1.47122</b> | cold up vs hot |
| CSDAP1    | 0.000736988 | 0.00137785  | 1.47001 | <b>1.47001</b> | cold up vs hot |
| ALKBH2    | 3.34E-10    | 1.57E-09    | 1.46988 | <b>1.46988</b> | cold up vs hot |
| FKBP4     | 2.20E-08    | 8.77E-08    | 1.46933 | <b>1.46933</b> | cold up vs hot |
| DBN1      | 4.47E-05    | 0.000113202 | 1.46907 | <b>1.46907</b> | cold up vs hot |
| GPM6B     | 0.00369766  | 0.00551494  | 1.46871 | <b>1.46871</b> | cold up vs hot |
| PIK3R2    | 1.03E-10    | 5.01E-10    | 1.46848 | <b>1.46848</b> | cold up vs hot |
| PUS7      | 1.64E-07    | 6.01E-07    | 1.46637 | <b>1.46637</b> | cold up vs hot |
| PTGFRN    | 0.00352948  | 0.0053041   | 1.46621 | <b>1.46621</b> | cold up vs hot |
| LOC100130 | 0.000859046 | 0.00157846  | 1.46607 | <b>1.46607</b> | cold up vs hot |
| LOC401127 | 0.000255874 | 0.000536979 | 1.46571 | <b>1.46571</b> | cold up vs hot |
| CCNT1     | 0.000760635 | 0.00141598  | 1.46571 | <b>1.46571</b> | cold up vs hot |
| KCTD3     | 2.19E-06    | 6.93E-06    | 1.46501 | <b>1.46501</b> | cold up vs hot |
| TOP1MT    | 1.99E-07    | 7.22E-07    | 1.46458 | <b>1.46458</b> | cold up vs hot |
| ZNF496    | 7.24E-07    | 2.46E-06    | 1.46396 | <b>1.46396</b> | cold up vs hot |
| C9orf43   | 0.00454406  | 0.00654548  | 1.46262 | <b>1.46262</b> | cold up vs hot |
| KDM5B     | 7.10E-07    | 2.42E-06    | 1.46244 | <b>1.46244</b> | cold up vs hot |
| PLD6      | 9.72E-05    | 0.000228338 | 1.46086 | <b>1.46086</b> | cold up vs hot |
| GTF2IRD1  | 5.46E-07    | 1.88E-06    | 1.46039 | <b>1.46039</b> | cold up vs hot |
| WDR90     | 1.66E-05    | 4.54E-05    | 1.45993 | <b>1.45993</b> | cold up vs hot |
| DLG5      | 2.53E-06    | 7.93E-06    | 1.45966 | <b>1.45966</b> | cold up vs hot |
| ZNF221    | 0.000124818 | 0.000286645 | 1.45939 | <b>1.45939</b> | cold up vs hot |
| FBXL18    | 6.32E-07    | 2.16E-06    | 1.4584  | <b>1.4584</b>  | cold up vs hot |
| C7orf10   | 0.00421933  | 0.00614966  | 1.45472 | <b>1.45472</b> | cold up vs hot |
| ZMAT3     | 0.00015687  | 0.00035027  | 1.45462 | <b>1.45462</b> | cold up vs hot |
| PHLDA1    | 1.93E-05    | 5.21E-05    | 1.45456 | <b>1.45456</b> | cold up vs hot |
| SLC2A1    | 0.00062469  | 0.00119145  | 1.45274 | <b>1.45274</b> | cold up vs hot |
| C10orf2   | 2.27E-07    | 8.15E-07    | 1.45148 | <b>1.45148</b> | cold up vs hot |
| ENAH      | 0.000817967 | 0.00151192  | 1.45141 | <b>1.45141</b> | cold up vs hot |
| OBSL1     | 0.00113037  | 0.0020018   | 1.45098 | <b>1.45098</b> | cold up vs hot |
| MSTO2P    | 1.59E-05    | 4.36E-05    | 1.45044 | <b>1.45044</b> | cold up vs hot |
| C4orf12   | 0.00257225  | 0.00403175  | 1.44958 | <b>1.44958</b> | cold up vs hot |
| C7orf68   | 8.06E-07    | 2.72E-06    | 1.44951 | <b>1.44951</b> | cold up vs hot |
| OTUD3     | 5.80E-06    | 1.71E-05    | 1.44914 | <b>1.44914</b> | cold up vs hot |
| FAM83H    | 0.00661653  | 0.00895932  | 1.44758 | <b>1.44758</b> | cold up vs hot |
| TOMM20    | 1.47E-07    | 5.42E-07    | 1.44752 | <b>1.44752</b> | cold up vs hot |
| PRR22     | 0.00207168  | 0.00336264  | 1.44749 | <b>1.44749</b> | cold up vs hot |
| IPO5      | 2.07E-09    | 9.10E-09    | 1.44737 | <b>1.44737</b> | cold up vs hot |
| LRRC49    | 0.00688319  | 0.00926656  | 1.447   | <b>1.447</b>   | cold up vs hot |
| ASPH      | 3.94E-05    | 0.000100461 | 1.44609 | <b>1.44609</b> | cold up vs hot |
| ACVR2B    | 0.000114706 | 0.000265855 | 1.44582 | <b>1.44582</b> | cold up vs hot |
| ZFP112    | 2.16E-05    | 5.80E-05    | 1.4453  | <b>1.4453</b>  | cold up vs hot |
| APP       | 0.00358425  | 0.00537033  | 1.44435 | <b>1.44435</b> | cold up vs hot |
| CCDC149   | 0.00484419  | 0.00690918  | 1.44427 | <b>1.44427</b> | cold up vs hot |
| RP55      | 6.98E-08    | 2.66E-07    | 1.44418 | <b>1.44418</b> | cold up vs hot |
| GNA11     | 1.54E-08    | 6.25E-08    | 1.44321 | <b>1.44321</b> | cold up vs hot |
| JUB       | 0.000422402 | 0.000843153 | 1.4428  | <b>1.4428</b>  | cold up vs hot |
| PTPN21    | 0.000219585 | 0.000468199 | 1.44196 | <b>1.44196</b> | cold up vs hot |
| CCDC122   | 0.0009282   | 0.0016856   | 1.44152 | <b>1.44152</b> | cold up vs hot |
| HK2       | 0.000190886 | 0.000413904 | 1.4405  | <b>1.4405</b>  | cold up vs hot |
| LRRC56    | 0.000771472 | 0.00143574  | 1.43943 | <b>1.43943</b> | cold up vs hot |
| UNC119B   | 1.85E-07    | 6.73E-07    | 1.43923 | <b>1.43923</b> | cold up vs hot |
| ARHGAP5   | 2.75E-05    | 7.22E-05    | 1.43921 | <b>1.43921</b> | cold up vs hot |
| C2orf63   | 0.0055477   | 0.0077091   | 1.43891 | <b>1.43891</b> | cold up vs hot |
| TNPO2     | 7.71E-15    | 4.64E-14    | 1.43856 | <b>1.43856</b> | cold up vs hot |
| NBPF9     | 3.37E-05    | 8.67E-05    | 1.43828 | <b>1.43828</b> | cold up vs hot |
| XPNPEP3   | 2.67E-07    | 9.51E-07    | 1.43423 | <b>1.43423</b> | cold up vs hot |
| PPFIA3    | 0.00137112  | 0.00235869  | 1.43376 | <b>1.43376</b> | cold up vs hot |
| CDR2L     | 0.00414888  | 0.00606594  | 1.43357 | <b>1.43357</b> | cold up vs hot |
| KHDRBS3   | 0.00676873  | 0.00914157  | 1.4324  | <b>1.4324</b>  | cold up vs hot |
| LOC646762 | 0.000359378 | 0.000727306 | 1.43185 | <b>1.43185</b> | cold up vs hot |
| BTBD3     | 0.000296082 | 0.00061211  | 1.43161 | <b>1.43161</b> | cold up vs hot |
| NAT14     | 4.58E-06    | 1.38E-05    | 1.43108 | <b>1.43108</b> | cold up vs hot |
| GPR153    | 0.00239193  | 0.00379376  | 1.43081 | <b>1.43081</b> | cold up vs hot |
| ZDHHC8    | 1.88E-06    | 6.02E-06    | 1.42936 | <b>1.42936</b> | cold up vs hot |
| TRIO      | 7.35E-05    | 0.00017768  | 1.42768 | <b>1.42768</b> | cold up vs hot |
| CSNK1E    | 2.64E-09    | 1.15E-08    | 1.4274  | <b>1.4274</b>  | cold up vs hot |
| LRIG3     | 0.00650126  | 0.00882153  | 1.42651 | <b>1.42651</b> | cold up vs hot |
| C19orf44  | 2.18E-12    | 1.18E-11    | 1.42634 | <b>1.42634</b> | cold up vs hot |
| LCA5      | 0.00133671  | 0.00231211  | 1.42599 | <b>1.42599</b> | cold up vs hot |

|           |             |             |         |                |                |
|-----------|-------------|-------------|---------|----------------|----------------|
| ZNF643    | 0.00221362  | 0.00356026  | 1.42445 | <b>1.42445</b> | cold up vs hot |
| KCNE2     | 0.00188197  | 0.00309317  | 1.42427 | <b>1.42427</b> | cold up vs hot |
| PACRGL    | 1.40E-06    | 4.54E-06    | 1.42426 | <b>1.42426</b> | cold up vs hot |
| TDRD3     | 0.00576372  | 0.00795162  | 1.42418 | <b>1.42418</b> | cold up vs hot |
| GEFT      | 0.00121706  | 0.00212902  | 1.42328 | <b>1.42328</b> | cold up vs hot |
| CBX6      | 0.000220816 | 0.000469903 | 1.42286 | <b>1.42286</b> | cold up vs hot |
| ISYNA1    | 0.00155605  | 0.002629    | 1.42261 | <b>1.42261</b> | cold up vs hot |
| PRMT5     | 3.80E-10    | 1.78E-09    | 1.42234 | <b>1.42234</b> | cold up vs hot |
| NUFIP1    | 1.04E-09    | 4.69E-09    | 1.42151 | <b>1.42151</b> | cold up vs hot |
| HDAC4     | 1.95E-06    | 6.23E-06    | 1.42126 | <b>1.42126</b> | cold up vs hot |
| HOOK2     | 1.09E-06    | 3.59E-06    | 1.42074 | <b>1.42074</b> | cold up vs hot |
| SCRIB     | 1.49E-05    | 4.12E-05    | 1.41946 | <b>1.41946</b> | cold up vs hot |
| LAPTM4B   | 8.48E-05    | 0.000201745 | 1.41914 | <b>1.41914</b> | cold up vs hot |
| ZNF470    | 0.00323099  | 0.00492324  | 1.41854 | <b>1.41854</b> | cold up vs hot |
| THSD1P1   | 1.34E-05    | 3.74E-05    | 1.41831 | <b>1.41831</b> | cold up vs hot |
| WIZ       | 7.49E-10    | 3.42E-09    | 1.41822 | <b>1.41822</b> | cold up vs hot |
| NLE1      | 2.03E-08    | 8.14E-08    | 1.41739 | <b>1.41739</b> | cold up vs hot |
| LAMC1     | 0.000219687 | 0.000468264 | 1.417   | <b>1.417</b>   | cold up vs hot |
| LYSMD1    | 1.78E-07    | 6.50E-07    | 1.41693 | <b>1.41693</b> | cold up vs hot |
| DOT1L     | 1.48E-06    | 4.80E-06    | 1.41664 | <b>1.41664</b> | cold up vs hot |
| MIB1      | 6.20E-05    | 0.000152088 | 1.41656 | <b>1.41656</b> | cold up vs hot |
| LAMA4     | 0.0059237   | 0.00814451  | 1.41608 | <b>1.41608</b> | cold up vs hot |
| LAMB1     | 0.00275316  | 0.00428444  | 1.41581 | <b>1.41581</b> | cold up vs hot |
| DPH3B     | 0.000239482 | 0.000505668 | 1.41548 | <b>1.41548</b> | cold up vs hot |
| FZD3      | 0.000112355 | 0.000260591 | 1.41541 | <b>1.41541</b> | cold up vs hot |
| NMB       | 0.000190552 | 0.000413384 | 1.41533 | <b>1.41533</b> | cold up vs hot |
| SHMT2     | 2.13E-07    | 7.68E-07    | 1.41423 | <b>1.41423</b> | cold up vs hot |
| BYSL      | 7.33E-08    | 2.79E-07    | 1.4141  | <b>1.4141</b>  | cold up vs hot |
| TMEM198   | 0.00096889  | 0.00175073  | 1.41287 | <b>1.41287</b> | cold up vs hot |
| PPFIBP1   | 0.000266563 | 0.000556904 | 1.41246 | <b>1.41246</b> | cold up vs hot |
| YES1      | 0.000107792 | 0.000251427 | 1.4124  | <b>1.4124</b>  | cold up vs hot |
| ZNF177    | 0.00438859  | 0.00635661  | 1.41193 | <b>1.41193</b> | cold up vs hot |
| ZNF670    | 0.00146241  | 0.00249338  | 1.41187 | <b>1.41187</b> | cold up vs hot |
| DDX21     | 0.000103787 | 0.000242616 | 1.41129 | <b>1.41129</b> | cold up vs hot |
| PIBF1     | 0.00356947  | 0.00535188  | 1.41098 | <b>1.41098</b> | cold up vs hot |
| SORD      | 0.000383774 | 0.000771409 | 1.41096 | <b>1.41096</b> | cold up vs hot |
| ProSAP1P1 | 0.00118569  | 0.00208156  | 1.41061 | <b>1.41061</b> | cold up vs hot |
| CECR5     | 4.93E-09    | 2.10E-08    | 1.41032 | <b>1.41032</b> | cold up vs hot |
| C1orf192  | 0.000412563 | 0.000825211 | 1.40976 | <b>1.40976</b> | cold up vs hot |
| FKBP10    | 0.00589025  | 0.00810364  | 1.40953 | <b>1.40953</b> | cold up vs hot |
| SNHG3     | 0.00156602  | 0.0026438   | 1.40912 | <b>1.40912</b> | cold up vs hot |
| MEGF8     | 1.54E-05    | 4.23E-05    | 1.40897 | <b>1.40897</b> | cold up vs hot |
| PYCR1     | 0.000165249 | 0.000365855 | 1.40813 | <b>1.40813</b> | cold up vs hot |
| AHCY      | 4.04E-06    | 1.23E-05    | 1.40798 | <b>1.40798</b> | cold up vs hot |
| TMEM20    | 1.11E-05    | 3.15E-05    | 1.40739 | <b>1.40739</b> | cold up vs hot |
| MAML3     | 0.000379121 | 0.000763466 | 1.40729 | <b>1.40729</b> | cold up vs hot |
| FAM119B   | 3.46E-06    | 1.06E-05    | 1.40721 | <b>1.40721</b> | cold up vs hot |
| SLC7A1    | 0.00012263  | 0.000282416 | 1.40675 | <b>1.40675</b> | cold up vs hot |
| C18orf45  | 4.33E-09    | 1.85E-08    | 1.40665 | <b>1.40665</b> | cold up vs hot |
| SH3BGR    | 0.00129713  | 0.00224978  | 1.40648 | <b>1.40648</b> | cold up vs hot |
| NELF      | 6.37E-05    | 0.000156033 | 1.40627 | <b>1.40627</b> | cold up vs hot |
| CENPF     | 0.000757059 | 0.00141012  | 1.40423 | <b>1.40423</b> | cold up vs hot |
| SLC25A23  | 0.000120263 | 0.000277454 | 1.40415 | <b>1.40415</b> | cold up vs hot |
| SNHG1     | 0.000148626 | 0.000334032 | 1.40401 | <b>1.40401</b> | cold up vs hot |
| DPY19L4   | 8.10E-05    | 0.000193982 | 1.4035  | <b>1.4035</b>  | cold up vs hot |
| LOC441208 | 0.000188186 | 0.000408728 | 1.40325 | <b>1.40325</b> | cold up vs hot |
| SNRNP48   | 0.000152594 | 0.000341774 | 1.40289 | <b>1.40289</b> | cold up vs hot |
| C22orf29  | 5.47E-09    | 2.32E-08    | 1.40281 | <b>1.40281</b> | cold up vs hot |
| LOC654342 | 0.00205354  | 0.00333833  | 1.40266 | <b>1.40266</b> | cold up vs hot |
| B4GALT2   | 1.46E-08    | 5.93E-08    | 1.40154 | <b>1.40154</b> | cold up vs hot |
| TRIP6     | 0.000278329 | 0.000579815 | 1.40069 | <b>1.40069</b> | cold up vs hot |
| FOXK1     | 1.41E-06    | 4.58E-06    | 1.40049 | <b>1.40049</b> | cold up vs hot |
| C19orf48  | 1.94E-05    | 5.23E-05    | 1.3992  | <b>1.3992</b>  | cold up vs hot |
| GSTA4     | 0.00541522  | 0.00756169  | 1.39907 | <b>1.39907</b> | cold up vs hot |
| PARD3     | 0.00198808  | 0.00325119  | 1.39883 | <b>1.39883</b> | cold up vs hot |
| PFAS      | 7.71E-08    | 2.93E-07    | 1.39842 | <b>1.39842</b> | cold up vs hot |
| ACPL2     | 0.000339543 | 0.000692744 | 1.39745 | <b>1.39745</b> | cold up vs hot |
| CHPF      | 0.000907673 | 0.00165292  | 1.39644 | <b>1.39644</b> | cold up vs hot |
| CYTH3     | 0.00196515  | 0.00321773  | 1.39624 | <b>1.39624</b> | cold up vs hot |
| CCDC86    | 2.13E-09    | 9.33E-09    | 1.39593 | <b>1.39593</b> | cold up vs hot |
| GOLGA6L1  | 0.00400763  | 0.00589375  | 1.3951  | <b>1.3951</b>  | cold up vs hot |
| ZNF473    | 1.82E-08    | 7.30E-08    | 1.39498 | <b>1.39498</b> | cold up vs hot |
| CAD       | 4.61E-07    | 1.60E-06    | 1.39404 | <b>1.39404</b> | cold up vs hot |
| NPM3      | 1.18E-06    | 3.87E-06    | 1.39386 | <b>1.39386</b> | cold up vs hot |
| INTS4L1   | 0.000453474 | 0.000898233 | 1.39371 | <b>1.39371</b> | cold up vs hot |
| FAM60A    | 0.000259447 | 0.000543604 | 1.39315 | <b>1.39315</b> | cold up vs hot |
| TUBB1     | 0.00516509  | 0.0072637   | 1.3929  | <b>1.3929</b>  | cold up vs hot |

|           |             |             |         |                |                |
|-----------|-------------|-------------|---------|----------------|----------------|
| NUDT15    | 3.55E-07    | 1.25E-06    | 1.39238 | <b>1.39238</b> | cold up vs hot |
| PRKDC     | 9.31E-07    | 3.11E-06    | 1.39227 | <b>1.39227</b> | cold up vs hot |
| FLJ14107  | 0.00598674  | 0.00821388  | 1.39222 | <b>1.39222</b> | cold up vs hot |
| ETV2      | 0.00390549  | 0.00577084  | 1.39201 | <b>1.39201</b> | cold up vs hot |
| EIF3E     | 1.25E-05    | 3.51E-05    | 1.392   | <b>1.392</b>   | cold up vs hot |
| CUL7      | 5.53E-06    | 1.64E-05    | 1.39155 | <b>1.39155</b> | cold up vs hot |
| ZNRF3     | 9.67E-05    | 0.000227537 | 1.39155 | <b>1.39155</b> | cold up vs hot |
| LOC729020 | 3.94E-07    | 1.38E-06    | 1.39146 | <b>1.39146</b> | cold up vs hot |
| URB1      | 8.93E-08    | 3.36E-07    | 1.39144 | <b>1.39144</b> | cold up vs hot |
| SC65      | 0.000268594 | 0.000560789 | 1.3914  | <b>1.3914</b>  | cold up vs hot |
| HIC2      | 3.76E-05    | 9.63E-05    | 1.39102 | <b>1.39102</b> | cold up vs hot |
| PVR       | 0.000111009 | 0.000257836 | 1.39028 | <b>1.39028</b> | cold up vs hot |
| HAS3      | 0.00689483  | 0.00927457  | 1.38834 | <b>1.38834</b> | cold up vs hot |
| NDFIP2    | 0.000106234 | 0.000247981 | 1.38747 | <b>1.38747</b> | cold up vs hot |
| ARVCF     | 0.000991731 | 0.00178667  | 1.38669 | <b>1.38669</b> | cold up vs hot |
| TRIM16L   | 0.00137555  | 0.00236505  | 1.38657 | <b>1.38657</b> | cold up vs hot |
| CLCN3     | 7.92E-05    | 0.000190008 | 1.3865  | <b>1.3865</b>  | cold up vs hot |
| RAVER2    | 0.00380318  | 0.00564716  | 1.38618 | <b>1.38618</b> | cold up vs hot |
| RRP15     | 1.30E-06    | 4.23E-06    | 1.38569 | <b>1.38569</b> | cold up vs hot |
| LOC148189 | 8.97E-08    | 3.38E-07    | 1.38507 | <b>1.38507</b> | cold up vs hot |
| LOC80154  | 0.000889121 | 0.00162276  | 1.38456 | <b>1.38456</b> | cold up vs hot |
| KIAA0114  | 0.000908201 | 0.00165342  | 1.38402 | <b>1.38402</b> | cold up vs hot |
| ISPD      | 0.00664652  | 0.00899618  | 1.38338 | <b>1.38338</b> | cold up vs hot |
| C20orf199 | 0.000100117 | 0.000234457 | 1.38148 | <b>1.38148</b> | cold up vs hot |
| CSDA      | 0.00330063  | 0.00501212  | 1.38111 | <b>1.38111</b> | cold up vs hot |
| GTPBP3    | 1.27E-08    | 5.17E-08    | 1.38012 | <b>1.38012</b> | cold up vs hot |
| SNORD1C   | 0.00546701  | 0.00761177  | 1.37923 | <b>1.37923</b> | cold up vs hot |
| LMNB2     | 2.43E-06    | 7.65E-06    | 1.37849 | <b>1.37849</b> | cold up vs hot |
| ANKRD26   | 0.00499079  | 0.00707338  | 1.37845 | <b>1.37845</b> | cold up vs hot |
| RPL13AP6  | 0.00146311  | 0.00249345  | 1.37829 | <b>1.37829</b> | cold up vs hot |
| KLHL11    | 0.00228195  | 0.00364859  | 1.37663 | <b>1.37663</b> | cold up vs hot |
| NANP      | 5.68E-07    | 1.95E-06    | 1.37631 | <b>1.37631</b> | cold up vs hot |
| PAICS     | 5.32E-08    | 2.05E-07    | 1.37572 | <b>1.37572</b> | cold up vs hot |
| PFKM      | 6.19E-07    | 2.12E-06    | 1.37497 | <b>1.37497</b> | cold up vs hot |
| C1orf53   | 0.00247271  | 0.00390008  | 1.37486 | <b>1.37486</b> | cold up vs hot |
| BIVM      | 0.00246279  | 0.00388725  | 1.37479 | <b>1.37479</b> | cold up vs hot |
| UBA2      | 1.94E-06    | 6.19E-06    | 1.37466 | <b>1.37466</b> | cold up vs hot |
| CSNK2A1P  | 6.79E-07    | 2.31E-06    | 1.37448 | <b>1.37448</b> | cold up vs hot |
| CEP170    | 0.000232108 | 0.000491529 | 1.37409 | <b>1.37409</b> | cold up vs hot |
| TMEM99    | 0.000281345 | 0.00058535  | 1.37409 | <b>1.37409</b> | cold up vs hot |
| RNF207    | 0.0038923   | 0.00575917  | 1.37377 | <b>1.37377</b> | cold up vs hot |
| LONP1     | 8.67E-07    | 2.91E-06    | 1.37356 | <b>1.37356</b> | cold up vs hot |
| CDK4      | 8.86E-06    | 2.55E-05    | 1.37324 | <b>1.37324</b> | cold up vs hot |
| TLL12     | 0.000187461 | 0.000407289 | 1.37287 | <b>1.37287</b> | cold up vs hot |
| EXO1      | 0.00182927  | 0.00302177  | 1.37276 | <b>1.37276</b> | cold up vs hot |
| ZNF696    | 2.04E-06    | 6.49E-06    | 1.37239 | <b>1.37239</b> | cold up vs hot |
| PELI2     | 0.00429222  | 0.00623917  | 1.37213 | <b>1.37213</b> | cold up vs hot |
| ZNF778    | 3.05E-05    | 7.94E-05    | 1.37156 | <b>1.37156</b> | cold up vs hot |
| SLMO1     | 0.000135971 | 0.000308997 | 1.37146 | <b>1.37146</b> | cold up vs hot |
| MGC23270  | 0.00278118  | 0.00432083  | 1.3714  | <b>1.3714</b>  | cold up vs hot |
| ZNF519    | 0.00354579  | 0.00532313  | 1.3713  | <b>1.3713</b>  | cold up vs hot |
| SEC16B    | 0.00617462  | 0.00842575  | 1.37104 | <b>1.37104</b> | cold up vs hot |
| ERF       | 8.62E-05    | 0.000204629 | 1.36968 | <b>1.36968</b> | cold up vs hot |
| SLC19A2   | 0.00331888  | 0.00503281  | 1.36874 | <b>1.36874</b> | cold up vs hot |
| TTC28     | 0.00181542  | 0.00300117  | 1.36855 | <b>1.36855</b> | cold up vs hot |
| PDZD8     | 0.000124305 | 0.000285667 | 1.36845 | <b>1.36845</b> | cold up vs hot |
| ZNF462    | 5.15E-05    | 0.000128829 | 1.36749 | <b>1.36749</b> | cold up vs hot |
| SLC25A37  | 0.000260173 | 0.000544775 | 1.36661 | <b>1.36661</b> | cold up vs hot |
| RGMB      | 0.00444578  | 0.00642518  | 1.3665  | <b>1.3665</b>  | cold up vs hot |
| AGRN      | 0.00330877  | 0.00502098  | 1.3662  | <b>1.3662</b>  | cold up vs hot |
| ASB1      | 9.71E-07    | 3.24E-06    | 1.36547 | <b>1.36547</b> | cold up vs hot |
| RPS18     | 0.000130408 | 0.000297389 | 1.36495 | <b>1.36495</b> | cold up vs hot |
| MEIS3P1   | 0.000865026 | 0.00158677  | 1.36462 | <b>1.36462</b> | cold up vs hot |
| LOC284023 | 9.75E-06    | 2.78E-05    | 1.36437 | <b>1.36437</b> | cold up vs hot |
| ZDHH9     | 1.10E-07    | 4.09E-07    | 1.36356 | <b>1.36356</b> | cold up vs hot |
| PDP2      | 4.25E-05    | 0.000107783 | 1.36323 | <b>1.36323</b> | cold up vs hot |
| MYBBP1A   | 2.41E-06    | 7.60E-06    | 1.36257 | <b>1.36257</b> | cold up vs hot |
| TTC25     | 0.00609855  | 0.00834946  | 1.36255 | <b>1.36255</b> | cold up vs hot |
| SPATA6    | 0.0023563   | 0.00374635  | 1.36209 | <b>1.36209</b> | cold up vs hot |
| BRWD3     | 0.000815287 | 0.00150768  | 1.36202 | <b>1.36202</b> | cold up vs hot |
| XYLB      | 0.00254299  | 0.00399069  | 1.36171 | <b>1.36171</b> | cold up vs hot |
| GGH       | 0.000676391 | 0.00127589  | 1.36162 | <b>1.36162</b> | cold up vs hot |
| ACACA     | 2.20E-07    | 7.92E-07    | 1.36148 | <b>1.36148</b> | cold up vs hot |
| NPHP4     | 0.000575621 | 0.00110692  | 1.36111 | <b>1.36111</b> | cold up vs hot |
| CCDC41    | 0.00259551  | 0.00406334  | 1.36109 | <b>1.36109</b> | cold up vs hot |
| ZNF426    | 0.000576841 | 0.00110861  | 1.36027 | <b>1.36027</b> | cold up vs hot |
| CD3EAP    | 1.77E-08    | 7.15E-08    | 1.36017 | <b>1.36017</b> | cold up vs hot |

|           |             |             |         |                |                |
|-----------|-------------|-------------|---------|----------------|----------------|
| GAN       | 0.000541107 | 0.00104952  | 1.35989 | <b>1.35989</b> | cold up vs hot |
| TRMT5     | 3.70E-08    | 1.45E-07    | 1.35973 | <b>1.35973</b> | cold up vs hot |
| ZNF8      | 1.07E-06    | 3.53E-06    | 1.35948 | <b>1.35948</b> | cold up vs hot |
| ZC3H8     | 3.96E-05    | 0.000100935 | 1.3593  | <b>1.3593</b>  | cold up vs hot |
| PPP1R14B  | 9.10E-05    | 0.000215343 | 1.35922 | <b>1.35922</b> | cold up vs hot |
| ILVBL     | 0.000749657 | 0.00139993  | 1.35913 | <b>1.35913</b> | cold up vs hot |
| LOC388796 | 5.30E-05    | 0.000132256 | 1.35911 | <b>1.35911</b> | cold up vs hot |
| ESF1      | 0.000188352 | 0.000408953 | 1.3587  | <b>1.3587</b>  | cold up vs hot |
| PRKCE     | 8.28E-05    | 0.000197851 | 1.35794 | <b>1.35794</b> | cold up vs hot |
| FAM129B   | 0.000229916 | 0.000487204 | 1.35726 | <b>1.35726</b> | cold up vs hot |
| LOC284232 | 0.00197931  | 0.00323848  | 1.35694 | <b>1.35694</b> | cold up vs hot |
| ZNF286A   | 0.000362156 | 0.000732694 | 1.35662 | <b>1.35662</b> | cold up vs hot |
| FITM2     | 0.00010798  | 0.000251518 | 1.35645 | <b>1.35645</b> | cold up vs hot |
| SNAPC1    | 0.000337195 | 0.000688383 | 1.35635 | <b>1.35635</b> | cold up vs hot |
| RPL36     | 5.03E-05    | 0.00012596  | 1.35604 | <b>1.35604</b> | cold up vs hot |
| MTSS1L    | 0.00373131  | 0.00555878  | 1.35589 | <b>1.35589</b> | cold up vs hot |
| GNG12     | 0.000212101 | 0.000455215 | 1.35567 | <b>1.35567</b> | cold up vs hot |
| FAM10A4   | 2.13E-06    | 6.76E-06    | 1.35552 | <b>1.35552</b> | cold up vs hot |
| EBPL      | 0.00516002  | 0.0072597   | 1.35523 | <b>1.35523</b> | cold up vs hot |
| NFYA      | 3.07E-05    | 7.99E-05    | 1.35517 | <b>1.35517</b> | cold up vs hot |
| FAM189B   | 2.97E-05    | 7.76E-05    | 1.35502 | <b>1.35502</b> | cold up vs hot |
| ANKS6     | 0.000681367 | 0.00128306  | 1.35487 | <b>1.35487</b> | cold up vs hot |
| GPATCH4   | 9.16E-08    | 3.45E-07    | 1.3547  | <b>1.3547</b>  | cold up vs hot |
| MAP4K4    | 1.37E-05    | 3.80E-05    | 1.35457 | <b>1.35457</b> | cold up vs hot |
| BNIP3     | 0.000662919 | 0.00125337  | 1.35449 | <b>1.35449</b> | cold up vs hot |
| MTFR1     | 2.14E-05    | 5.74E-05    | 1.35431 | <b>1.35431</b> | cold up vs hot |
| ACTR3B    | 0.00053697  | 0.00104265  | 1.354   | <b>1.354</b>   | cold up vs hot |
| HEATR2    | 5.24E-07    | 1.81E-06    | 1.35396 | <b>1.35396</b> | cold up vs hot |
| FBXW8     | 3.67E-08    | 1.43E-07    | 1.35389 | <b>1.35389</b> | cold up vs hot |
| TCF12     | 0.000537248 | 0.00104265  | 1.35366 | <b>1.35366</b> | cold up vs hot |
| DST       | 0.00452104  | 0.00651807  | 1.35324 | <b>1.35324</b> | cold up vs hot |
| HEATR1    | 9.04E-06    | 2.60E-05    | 1.35289 | <b>1.35289</b> | cold up vs hot |
| MTHFD1L   | 0.000108401 | 0.000252226 | 1.35153 | <b>1.35153</b> | cold up vs hot |
| P4HA1     | 0.000126205 | 0.000289103 | 1.35148 | <b>1.35148</b> | cold up vs hot |
| MUM1      | 1.36E-06    | 4.42E-06    | 1.35139 | <b>1.35139</b> | cold up vs hot |
| KIAA1430  | 4.78E-05    | 0.000120082 | 1.35135 | <b>1.35135</b> | cold up vs hot |
| LOC100190 | 0.000838674 | 0.00154538  | 1.35103 | <b>1.35103</b> | cold up vs hot |
| RAD54L2   | 0.000319898 | 0.000655944 | 1.35057 | <b>1.35057</b> | cold up vs hot |
| C6orf48   | 0.00115311  | 0.0020357   | 1.35035 | <b>1.35035</b> | cold up vs hot |
| CCT3      | 2.90E-07    | 1.03E-06    | 1.34995 | <b>1.34995</b> | cold up vs hot |
| ZNF623    | 1.83E-06    | 5.87E-06    | 1.34981 | <b>1.34981</b> | cold up vs hot |
| ST13      | 1.77E-06    | 5.70E-06    | 1.3493  | <b>1.3493</b>  | cold up vs hot |
| TMEM161A  | 1.34E-05    | 3.72E-05    | 1.34911 | <b>1.34911</b> | cold up vs hot |
| HMGCR     | 0.000140821 | 0.000318686 | 1.34888 | <b>1.34888</b> | cold up vs hot |
| NBPF15    | 0.00051629  | 0.00100737  | 1.3485  | <b>1.3485</b>  | cold up vs hot |
| RPL10A    | 1.79E-06    | 5.73E-06    | 1.3482  | <b>1.3482</b>  | cold up vs hot |
| C16orf52  | 0.00138315  | 0.00237691  | 1.3475  | <b>1.3475</b>  | cold up vs hot |
| LOC100130 | 0.00528385  | 0.00739883  | 1.34748 | <b>1.34748</b> | cold up vs hot |
| PLCD3     | 0.00117288  | 0.00206335  | 1.34713 | <b>1.34713</b> | cold up vs hot |
| RAD54B    | 0.000185335 | 0.000402938 | 1.34701 | <b>1.34701</b> | cold up vs hot |
| ZBED4     | 5.97E-07    | 2.05E-06    | 1.3469  | <b>1.3469</b>  | cold up vs hot |
| TFAP4     | 3.13E-06    | 9.67E-06    | 1.34651 | <b>1.34651</b> | cold up vs hot |
| HSPD1     | 2.36E-06    | 7.44E-06    | 1.34635 | <b>1.34635</b> | cold up vs hot |
| C14orf147 | 0.000121476 | 0.000280053 | 1.34619 | <b>1.34619</b> | cold up vs hot |
| WWC2      | 0.00186475  | 0.00307183  | 1.34597 | <b>1.34597</b> | cold up vs hot |
| C1orf163  | 3.22E-07    | 1.13E-06    | 1.34595 | <b>1.34595</b> | cold up vs hot |
| THNSL1    | 0.000286015 | 0.000594309 | 1.3459  | <b>1.3459</b>  | cold up vs hot |
| C1orf107  | 4.06E-06    | 1.23E-05    | 1.34582 | <b>1.34582</b> | cold up vs hot |
| NEK3      | 0.00412981  | 0.00604213  | 1.34582 | <b>1.34582</b> | cold up vs hot |
| ZNF77     | 3.80E-05    | 9.73E-05    | 1.34485 | <b>1.34485</b> | cold up vs hot |
| KLHL17    | 0.001239    | 0.00216138  | 1.34457 | <b>1.34457</b> | cold up vs hot |
| WDR27     | 0.00247617  | 0.0039046   | 1.34457 | <b>1.34457</b> | cold up vs hot |
| HES1      | 0.00107838  | 0.00192249  | 1.34456 | <b>1.34456</b> | cold up vs hot |
| QSER1     | 8.87E-05    | 0.00021053  | 1.34392 | <b>1.34392</b> | cold up vs hot |
| RRS1      | 3.45E-06    | 1.06E-05    | 1.3438  | <b>1.3438</b>  | cold up vs hot |
| ALG10B    | 0.000709976 | 0.00133193  | 1.34311 | <b>1.34311</b> | cold up vs hot |
| NFKBIL2   | 0.00232505  | 0.00370751  | 1.34301 | <b>1.34301</b> | cold up vs hot |
| ZC3H13    | 0.00460515  | 0.00662178  | 1.34242 | <b>1.34242</b> | cold up vs hot |
| GGT7      | 6.56E-05    | 0.000160474 | 1.34225 | <b>1.34225</b> | cold up vs hot |
| RFC3      | 0.000211259 | 0.000453856 | 1.34169 | <b>1.34169</b> | cold up vs hot |
| YAP1      | 0.000220559 | 0.000469816 | 1.34141 | <b>1.34141</b> | cold up vs hot |
| XPOS      | 1.43E-05    | 3.95E-05    | 1.34102 | <b>1.34102</b> | cold up vs hot |
| FAM83D    | 0.00430518  | 0.00625489  | 1.34097 | <b>1.34097</b> | cold up vs hot |
| LRPPRC    | 2.66E-07    | 9.47E-07    | 1.34085 | <b>1.34085</b> | cold up vs hot |
| FAM168B   | 2.76E-09    | 1.20E-08    | 1.34051 | <b>1.34051</b> | cold up vs hot |
| ZNF283    | 0.000123458 | 0.000284122 | 1.34032 | <b>1.34032</b> | cold up vs hot |
| SH3GL1    | 3.21E-06    | 9.91E-06    | 1.34004 | <b>1.34004</b> | cold up vs hot |

|           |             |             |         |                |                |
|-----------|-------------|-------------|---------|----------------|----------------|
| DSCC1     | 0.00151932  | 0.00257628  | 1.33995 | <b>1.33995</b> | cold up vs hot |
| CKAP2     | 0.000366576 | 0.000740948 | 1.3395  | <b>1.3395</b>  | cold up vs hot |
| C9orf117  | 0.000724223 | 0.00135632  | 1.33893 | <b>1.33893</b> | cold up vs hot |
| WDR18     | 3.04E-05    | 7.91E-05    | 1.33892 | <b>1.33892</b> | cold up vs hot |
| E1F3L     | 2.03E-05    | 5.47E-05    | 1.33847 | <b>1.33847</b> | cold up vs hot |
| TATDN1    | 4.74E-05    | 0.00011922  | 1.33785 | <b>1.33785</b> | cold up vs hot |
| ZNF562    | 1.31E-06    | 4.27E-06    | 1.33772 | <b>1.33772</b> | cold up vs hot |
| MLF1      | 0.00226723  | 0.00363039  | 1.33744 | <b>1.33744</b> | cold up vs hot |
| C8orf33   | 5.80E-06    | 1.71E-05    | 1.33739 | <b>1.33739</b> | cold up vs hot |
| LETM2     | 0.0027989   | 0.00434471  | 1.33708 | <b>1.33708</b> | cold up vs hot |
| SUN1      | 1.52E-06    | 4.93E-06    | 1.33697 | <b>1.33697</b> | cold up vs hot |
| PRPF40B   | 0.000169019 | 0.000372427 | 1.33684 | <b>1.33684</b> | cold up vs hot |
| TMEM5     | 2.29E-05    | 6.11E-05    | 1.33628 | <b>1.33628</b> | cold up vs hot |
| C8orf39   | 0.005191    | 0.00729542  | 1.33626 | <b>1.33626</b> | cold up vs hot |
| ZNF828    | 3.23E-05    | 8.35E-05    | 1.33584 | <b>1.33584</b> | cold up vs hot |
| RPL7L1    | 7.15E-06    | 2.08E-05    | 1.33564 | <b>1.33564</b> | cold up vs hot |
| PPP1R16A  | 0.000994288 | 0.00179067  | 1.33508 | <b>1.33508</b> | cold up vs hot |
| RAB3GAP2  | 0.000201443 | 0.000434629 | 1.33462 | <b>1.33462</b> | cold up vs hot |
| PPP2R3A   | 0.00149585  | 0.00253978  | 1.33462 | <b>1.33462</b> | cold up vs hot |
| PRKAB2    | 0.00154462  | 0.0026124   | 1.33458 | <b>1.33458</b> | cold up vs hot |
| ZNF605    | 0.00144861  | 0.00247372  | 1.33457 | <b>1.33457</b> | cold up vs hot |
| POLD2     | 4.44E-06    | 1.34E-05    | 1.33456 | <b>1.33456</b> | cold up vs hot |
| NFIC      | 0.000195333 | 0.000422423 | 1.33454 | <b>1.33454</b> | cold up vs hot |
| KIAA0895L | 0.000179659 | 0.000392559 | 1.3344  | <b>1.3344</b>  | cold up vs hot |
| SPATA2L   | 0.000206043 | 0.000443527 | 1.33392 | <b>1.33392</b> | cold up vs hot |
| SMARCA4   | 9.34E-08    | 3.50E-07    | 1.33331 | <b>1.33331</b> | cold up vs hot |
| CD276     | 0.000165592 | 0.000366236 | 1.33319 | <b>1.33319</b> | cold up vs hot |
| PAQR3     | 0.00145196  | 0.00247877  | 1.33317 | <b>1.33317</b> | cold up vs hot |
| NEU3      | 0.00456207  | 0.00656852  | 1.33265 | <b>1.33265</b> | cold up vs hot |
| RPRD1A    | 0.000942364 | 0.00170705  | 1.33257 | <b>1.33257</b> | cold up vs hot |
| DHX33     | 0.000335987 | 0.000686345 | 1.33211 | <b>1.33211</b> | cold up vs hot |
| ZKSCAN2   | 6.84E-06    | 2.00E-05    | 1.33202 | <b>1.33202</b> | cold up vs hot |
| PVT1      | 0.00100193  | 0.00180244  | 1.33184 | <b>1.33184</b> | cold up vs hot |
| ETV3L     | 0.00500259  | 0.00708248  | 1.33177 | <b>1.33177</b> | cold up vs hot |
| AMMECR1L  | 1.41E-07    | 5.20E-07    | 1.33108 | <b>1.33108</b> | cold up vs hot |
| C1orf69   | 2.93E-06    | 9.12E-06    | 1.33085 | <b>1.33085</b> | cold up vs hot |
| MAP4K5    | 0.000570935 | 0.00109888  | 1.33078 | <b>1.33078</b> | cold up vs hot |
| KCTD1     | 3.22E-05    | 8.33E-05    | 1.33034 | <b>1.33034</b> | cold up vs hot |
| KLF16     | 9.16E-05    | 0.000216707 | 1.33006 | <b>1.33006</b> | cold up vs hot |
| SMARCC1   | 2.51E-06    | 7.87E-06    | 1.32945 | <b>1.32945</b> | cold up vs hot |
| TMCO3     | 2.77E-05    | 7.27E-05    | 1.32914 | <b>1.32914</b> | cold up vs hot |
| ZKSCAN1   | 0.00243046  | 0.0038494   | 1.32911 | <b>1.32911</b> | cold up vs hot |
| PKD1      | 0.000109393 | 0.000254353 | 1.32893 | <b>1.32893</b> | cold up vs hot |
| OXR1      | 0.00450956  | 0.00650296  | 1.32867 | <b>1.32867</b> | cold up vs hot |
| PTK2      | 4.23E-07    | 1.48E-06    | 1.32824 | <b>1.32824</b> | cold up vs hot |
| CAMSAP1L  | 0.000237126 | 0.000501179 | 1.32745 | <b>1.32745</b> | cold up vs hot |
| ZNF581    | 2.89E-05    | 7.55E-05    | 1.32729 | <b>1.32729</b> | cold up vs hot |
| POLR1B    | 0.000188561 | 0.000409269 | 1.3272  | <b>1.3272</b>  | cold up vs hot |
| PES1      | 7.86E-06    | 2.27E-05    | 1.3271  | <b>1.3271</b>  | cold up vs hot |
| CBX8      | 7.15E-05    | 0.000173468 | 1.32657 | <b>1.32657</b> | cold up vs hot |
| TOM1L1    | 0.00292324  | 0.00451788  | 1.3264  | <b>1.3264</b>  | cold up vs hot |
| SMOX      | 0.00323238  | 0.00492337  | 1.32592 | <b>1.32592</b> | cold up vs hot |
| TNKS      | 9.21E-06    | 2.64E-05    | 1.32583 | <b>1.32583</b> | cold up vs hot |
| TULP3     | 4.59E-06    | 1.38E-05    | 1.3258  | <b>1.3258</b>  | cold up vs hot |
| RNF24     | 0.000135311 | 0.000307818 | 1.32577 | <b>1.32577</b> | cold up vs hot |
| ZNF555    | 1.33E-05    | 3.72E-05    | 1.32519 | <b>1.32519</b> | cold up vs hot |
| MEIS1     | 0.00287394  | 0.00444802  | 1.32488 | <b>1.32488</b> | cold up vs hot |
| RPLP0     | 5.88E-06    | 1.73E-05    | 1.32466 | <b>1.32466</b> | cold up vs hot |
| TCTN1     | 0.00149261  | 0.00253755  | 1.32452 | <b>1.32452</b> | cold up vs hot |
| HSP90AB2F | 0.005067    | 0.00715659  | 1.32443 | <b>1.32443</b> | cold up vs hot |
| RAD52     | 3.90E-06    | 1.19E-05    | 1.32426 | <b>1.32426</b> | cold up vs hot |
| ABI2      | 6.99E-06    | 2.04E-05    | 1.32337 | <b>1.32337</b> | cold up vs hot |
| ZNF507    | 8.56E-05    | 0.000203539 | 1.32336 | <b>1.32336</b> | cold up vs hot |
| BEND3     | 2.59E-05    | 6.85E-05    | 1.32326 | <b>1.32326</b> | cold up vs hot |
| TMEM48    | 0.000174464 | 0.000383003 | 1.32264 | <b>1.32264</b> | cold up vs hot |
| ZNF616    | 1.98E-05    | 5.35E-05    | 1.32259 | <b>1.32259</b> | cold up vs hot |
| UST       | 0.00458201  | 0.00659142  | 1.32253 | <b>1.32253</b> | cold up vs hot |
| NCKAP1    | 7.47E-06    | 2.17E-05    | 1.32226 | <b>1.32226</b> | cold up vs hot |
| FUT2      | 0.00278346  | 0.00432334  | 1.32212 | <b>1.32212</b> | cold up vs hot |
| RPL18A    | 7.80E-05    | 0.00018739  | 1.32193 | <b>1.32193</b> | cold up vs hot |
| RPL7      | 0.00048256  | 0.000948268 | 1.32172 | <b>1.32172</b> | cold up vs hot |
| UTP14C    | 4.57E-05    | 0.000115344 | 1.32158 | <b>1.32158</b> | cold up vs hot |
| WARS2     | 8.42E-05    | 0.000200531 | 1.32085 | <b>1.32085</b> | cold up vs hot |
| GPHN      | 8.94E-05    | 0.000211943 | 1.32064 | <b>1.32064</b> | cold up vs hot |
| RPL5      | 0.000197497 | 0.000426679 | 1.3206  | <b>1.3206</b>  | cold up vs hot |
| UTP20     | 6.36E-06    | 1.86E-05    | 1.32053 | <b>1.32053</b> | cold up vs hot |
| FAM186B   | 0.00744522  | 0.00988053  | 1.31976 | <b>1.31976</b> | cold up vs hot |

|           |             |             |         |                |                |
|-----------|-------------|-------------|---------|----------------|----------------|
| RUVBL2    | 3.90E-05    | 9.96E-05    | 1.31968 | <b>1.31968</b> | cold up vs hot |
| ABCB6     | 0.00165067  | 0.00276794  | 1.31962 | <b>1.31962</b> | cold up vs hot |
| TRAP1     | 1.87E-06    | 5.99E-06    | 1.31943 | <b>1.31943</b> | cold up vs hot |
| FLVCR1    | 0.000851298 | 0.00156599  | 1.3193  | <b>1.3193</b>  | cold up vs hot |
| SIX5      | 5.54E-05    | 0.00013745  | 1.31886 | <b>1.31886</b> | cold up vs hot |
| GPATCH2   | 0.000301764 | 0.000622476 | 1.31869 | <b>1.31869</b> | cold up vs hot |
| FLJ10357  | 0.00283833  | 0.00439916  | 1.31869 | <b>1.31869</b> | cold up vs hot |
| ZNF146    | 4.05E-05    | 0.00010307  | 1.31845 | <b>1.31845</b> | cold up vs hot |
| PANK3     | 0.00211211  | 0.0034206   | 1.31841 | <b>1.31841</b> | cold up vs hot |
| NCLN      | 9.28E-06    | 2.66E-05    | 1.31837 | <b>1.31837</b> | cold up vs hot |
| TFB2M     | 6.95E-05    | 0.000169011 | 1.31774 | <b>1.31774</b> | cold up vs hot |
| DPCD      | 0.000178736 | 0.000390673 | 1.31772 | <b>1.31772</b> | cold up vs hot |
| PDCD11    | 4.86E-06    | 1.45E-05    | 1.31757 | <b>1.31757</b> | cold up vs hot |
| WDR43     | 1.47E-05    | 4.07E-05    | 1.3175  | <b>1.3175</b>  | cold up vs hot |
| SSFA2     | 0.00495917  | 0.00704366  | 1.31748 | <b>1.31748</b> | cold up vs hot |
| URB2      | 2.51E-05    | 6.67E-05    | 1.31731 | <b>1.31731</b> | cold up vs hot |
| NUBPL     | 1.74E-05    | 4.74E-05    | 1.31728 | <b>1.31728</b> | cold up vs hot |
| RIC8B     | 9.12E-07    | 3.05E-06    | 1.317   | <b>1.317</b>   | cold up vs hot |
| RECQL4    | 0.00465833  | 0.00668647  | 1.31697 | <b>1.31697</b> | cold up vs hot |
| DOCK1     | 5.31E-05    | 0.000132334 | 1.31683 | <b>1.31683</b> | cold up vs hot |
| EPN2      | 9.05E-05    | 0.000214432 | 1.31678 | <b>1.31678</b> | cold up vs hot |
| ZNF192    | 0.00449206  | 0.00648202  | 1.31649 | <b>1.31649</b> | cold up vs hot |
| FAM172A   | 0.000718575 | 0.00134651  | 1.31637 | <b>1.31637</b> | cold up vs hot |
| TRIM28    | 9.11E-06    | 2.61E-05    | 1.31542 | <b>1.31542</b> | cold up vs hot |
| PPAN      | 1.59E-05    | 4.36E-05    | 1.31487 | <b>1.31487</b> | cold up vs hot |
| TXNRD3IT1 | 0.00133356  | 0.00230807  | 1.31411 | <b>1.31411</b> | cold up vs hot |
| POLR3D    | 2.95E-06    | 9.17E-06    | 1.31357 | <b>1.31357</b> | cold up vs hot |
| FAM13A    | 0.00733318  | 0.00975963  | 1.3135  | <b>1.3135</b>  | cold up vs hot |
| BPHL      | 0.000175412 | 0.000384566 | 1.31327 | <b>1.31327</b> | cold up vs hot |
| ZNF771    | 0.000511009 | 0.000997662 | 1.31315 | <b>1.31315</b> | cold up vs hot |
| KIAA0564  | 1.16E-05    | 3.28E-05    | 1.31202 | <b>1.31202</b> | cold up vs hot |
| MGC2752   | 1.46E-08    | 5.94E-08    | 1.31183 | <b>1.31183</b> | cold up vs hot |
| TTC21B    | 0.000326068 | 0.000667757 | 1.31157 | <b>1.31157</b> | cold up vs hot |
| RARG      | 0.000692815 | 0.00130198  | 1.31128 | <b>1.31128</b> | cold up vs hot |
| C20orf117 | 7.22E-05    | 0.000174987 | 1.31091 | <b>1.31091</b> | cold up vs hot |
| GEMIN4    | 2.12E-06    | 6.73E-06    | 1.31057 | <b>1.31057</b> | cold up vs hot |
| TMEM117   | 0.00629368  | 0.00857015  | 1.31037 | <b>1.31037</b> | cold up vs hot |
| C16orf88  | 8.34E-07    | 2.81E-06    | 1.31028 | <b>1.31028</b> | cold up vs hot |
| ARG2      | 0.00126576  | 0.0022018   | 1.31019 | <b>1.31019</b> | cold up vs hot |
| TCFL5     | 0.000517976 | 0.00101006  | 1.31009 | <b>1.31009</b> | cold up vs hot |
| TGDS      | 0.00733838  | 0.00976355  | 1.30991 | <b>1.30991</b> | cold up vs hot |
| CHD7      | 0.00123283  | 0.00215255  | 1.3097  | <b>1.3097</b>  | cold up vs hot |
| SLC4A7    | 0.00676634  | 0.00914131  | 1.30954 | <b>1.30954</b> | cold up vs hot |
| AKT1S1    | 7.27E-06    | 2.11E-05    | 1.30951 | <b>1.30951</b> | cold up vs hot |
| RPL8      | 0.000487238 | 0.000955828 | 1.30939 | <b>1.30939</b> | cold up vs hot |
| TRIB2     | 0.00489957  | 0.00697597  | 1.30936 | <b>1.30936</b> | cold up vs hot |
| ZFP41     | 0.000170907 | 0.000376081 | 1.30925 | <b>1.30925</b> | cold up vs hot |
| ADSL      | 6.71E-06    | 1.96E-05    | 1.3087  | <b>1.3087</b>  | cold up vs hot |
| SLC23A2   | 0.000547433 | 0.00106084  | 1.30867 | <b>1.30867</b> | cold up vs hot |
| FOXRED2   | 0.00209567  | 0.00339819  | 1.30853 | <b>1.30853</b> | cold up vs hot |
| C15orf41  | 0.000617217 | 0.00117961  | 1.3085  | <b>1.3085</b>  | cold up vs hot |
| UBXN8     | 6.62E-05    | 0.000161431 | 1.30772 | <b>1.30772</b> | cold up vs hot |
| C3orf39   | 4.20E-05    | 0.000106788 | 1.30712 | <b>1.30712</b> | cold up vs hot |
| VAR5      | 4.31E-05    | 0.000109273 | 1.30703 | <b>1.30703</b> | cold up vs hot |
| SYNGAP1   | 7.34E-05    | 0.000177477 | 1.30639 | <b>1.30639</b> | cold up vs hot |
| CLCN2     | 0.00645967  | 0.0087724   | 1.30602 | <b>1.30602</b> | cold up vs hot |
| HNF1A     | 0.000177459 | 0.000388271 | 1.306   | <b>1.306</b>   | cold up vs hot |
| MORN4     | 0.00129675  | 0.00224973  | 1.30596 | <b>1.30596</b> | cold up vs hot |
| ZNF260    | 0.00256217  | 0.00401692  | 1.30577 | <b>1.30577</b> | cold up vs hot |
| ANKRD50   | 0.00235369  | 0.00374312  | 1.30541 | <b>1.30541</b> | cold up vs hot |
| POLR1A    | 2.17E-05    | 5.83E-05    | 1.30533 | <b>1.30533</b> | cold up vs hot |
| EXTL3     | 5.58E-05    | 0.000138329 | 1.30493 | <b>1.30493</b> | cold up vs hot |
| STRAP     | 6.49E-08    | 2.49E-07    | 1.30474 | <b>1.30474</b> | cold up vs hot |
| ITLL11    | 0.000237699 | 0.000502229 | 1.30462 | <b>1.30462</b> | cold up vs hot |
| PAK1IP1   | 0.000562003 | 0.00108422  | 1.30437 | <b>1.30437</b> | cold up vs hot |
| SETD6     | 6.14E-06    | 1.80E-05    | 1.30426 | <b>1.30426</b> | cold up vs hot |
| SSRP1     | 9.43E-08    | 3.53E-07    | 1.30417 | <b>1.30417</b> | cold up vs hot |
| RPL13AP3  | 0.00141349  | 0.00242009  | 1.30372 | <b>1.30372</b> | cold up vs hot |
| HSP90AB1  | 1.81E-05    | 4.92E-05    | 1.30368 | <b>1.30368</b> | cold up vs hot |
| ZSCAN22   | 4.06E-08    | 1.58E-07    | 1.30346 | <b>1.30346</b> | cold up vs hot |
| TBC1D24   | 9.81E-05    | 0.000230479 | 1.3034  | <b>1.3034</b>  | cold up vs hot |
| ZNF512B   | 0.000129687 | 0.000295952 | 1.30306 | <b>1.30306</b> | cold up vs hot |
| ZNF205    | 0.000130053 | 0.000296685 | 1.30299 | <b>1.30299</b> | cold up vs hot |
| ZNF333    | 3.55E-05    | 9.11E-05    | 1.30235 | <b>1.30235</b> | cold up vs hot |
| DCAF16    | 0.000156235 | 0.000348972 | 1.30222 | <b>1.30222</b> | cold up vs hot |
| ZNF692    | 0.000439724 | 0.000873647 | 1.30214 | <b>1.30214</b> | cold up vs hot |
| MTA1      | 5.60E-06    | 1.66E-05    | 1.30204 | <b>1.30204</b> | cold up vs hot |

|           |             |             |         |                |                |
|-----------|-------------|-------------|---------|----------------|----------------|
| ZNF324B   | 1.47E-06    | 4.78E-06    | 1.30201 | <b>1.30201</b> | cold up vs hot |
| SLC39A6   | 0.00222404  | 0.00357351  | 1.30195 | <b>1.30195</b> | cold up vs hot |
| PUF60     | 3.22E-06    | 9.93E-06    | 1.30156 | <b>1.30156</b> | cold up vs hot |
| ZNF566    | 0.00139679  | 0.0023959   | 1.30144 | <b>1.30144</b> | cold up vs hot |
| SYDE1     | 0.00129085  | 0.00224068  | 1.30079 | <b>1.30079</b> | cold up vs hot |
| CHERP     | 5.81E-08    | 2.23E-07    | 1.30067 | <b>1.30067</b> | cold up vs hot |
| GPA1      | 0.00153215  | 0.00259332  | 1.30064 | <b>1.30064</b> | cold up vs hot |
| KBTBD7    | 0.00473826  | 0.00678032  | 1.30064 | <b>1.30064</b> | cold up vs hot |
| TOR1AIP2  | 0.00134288  | 0.00231928  | 1.30037 | <b>1.30037</b> | cold up vs hot |
| CCDC15    | 0.00228591  | 0.00365401  | 1.30031 | <b>1.30031</b> | cold up vs hot |
| ALS2CR4   | 0.00115588  | 0.00204003  | 1.30003 | <b>1.30003</b> | cold up vs hot |
| MMS19     | 6.65E-07    | 2.27E-06    | 1.29984 | <b>1.29984</b> | cold up vs hot |
| NPHP1     | 0.00392502  | 0.00579708  | 1.29976 | <b>1.29976</b> | cold up vs hot |
| ATP5D     | 0.0033034   | 0.005014    | 1.29952 | <b>1.29952</b> | cold up vs hot |
| NAB2      | 3.21E-05    | 8.32E-05    | 1.29913 | <b>1.29913</b> | cold up vs hot |
| C12orf11  | 0.000192415 | 0.000416941 | 1.29911 | <b>1.29911</b> | cold up vs hot |
| THAP10    | 0.00170371  | 0.00284242  | 1.29905 | <b>1.29905</b> | cold up vs hot |
| LOC348926 | 0.00016323  | 0.000362411 | 1.29879 | <b>1.29879</b> | cold up vs hot |
| RDH13     | 0.000461478 | 0.000912701 | 1.29834 | <b>1.29834</b> | cold up vs hot |
| ZNF395    | 0.00034947  | 0.000709889 | 1.29827 | <b>1.29827</b> | cold up vs hot |
| NPM1      | 0.00012835  | 0.000293311 | 1.29806 | <b>1.29806</b> | cold up vs hot |
| RBK1      | 0.00166031  | 0.00277997  | 1.29805 | <b>1.29805</b> | cold up vs hot |
| RPL37A    | 0.000108793 | 0.000253049 | 1.29766 | <b>1.29766</b> | cold up vs hot |
| IRGQ      | 2.95E-07    | 1.05E-06    | 1.29759 | <b>1.29759</b> | cold up vs hot |
| ZHX3      | 0.000382794 | 0.000769929 | 1.29721 | <b>1.29721</b> | cold up vs hot |
| NT5C3L    | 3.44E-05    | 8.84E-05    | 1.29707 | <b>1.29707</b> | cold up vs hot |
| POLRMT    | 8.22E-05    | 0.000196588 | 1.29695 | <b>1.29695</b> | cold up vs hot |
| AKT3      | 0.00174815  | 0.00290469  | 1.29682 | <b>1.29682</b> | cold up vs hot |
| MTBP      | 0.00628617  | 0.00856172  | 1.29639 | <b>1.29639</b> | cold up vs hot |
| PEMT      | 0.0010705   | 0.00190949  | 1.29584 | <b>1.29584</b> | cold up vs hot |
| SUCLA2    | 4.68E-05    | 0.000117862 | 1.29553 | <b>1.29553</b> | cold up vs hot |
| APEX1     | 1.26E-07    | 4.69E-07    | 1.29509 | <b>1.29509</b> | cold up vs hot |
| CDC44     | 0.000133008 | 0.000302684 | 1.29478 | <b>1.29478</b> | cold up vs hot |
| TEX10     | 9.90E-05    | 0.000232287 | 1.29473 | <b>1.29473</b> | cold up vs hot |
| GUF1      | 3.14E-05    | 8.15E-05    | 1.29472 | <b>1.29472</b> | cold up vs hot |
| CD320     | 0.00139781  | 0.00239702  | 1.29373 | <b>1.29373</b> | cold up vs hot |
| EEF1G     | 0.000239918 | 0.000506424 | 1.29364 | <b>1.29364</b> | cold up vs hot |
| METTL12   | 0.00525031  | 0.00736292  | 1.29348 | <b>1.29348</b> | cold up vs hot |
| DEAF1     | 0.00176692  | 0.00292916  | 1.29345 | <b>1.29345</b> | cold up vs hot |
| WDR4      | 0.000125783 | 0.000288454 | 1.29325 | <b>1.29325</b> | cold up vs hot |
| C8orf37   | 0.00617472  | 0.00842575  | 1.29283 | <b>1.29283</b> | cold up vs hot |
| UCK2      | 0.000102463 | 0.000239607 | 1.29277 | <b>1.29277</b> | cold up vs hot |
| GTF3C4    | 0.000716091 | 0.00134297  | 1.29276 | <b>1.29276</b> | cold up vs hot |
| EARS2     | 1.10E-06    | 3.62E-06    | 1.29247 | <b>1.29247</b> | cold up vs hot |
| FARSA     | 6.05E-06    | 1.78E-05    | 1.29166 | <b>1.29166</b> | cold up vs hot |
| ALDH7A1   | 0.00295922  | 0.00456161  | 1.2916  | <b>1.2916</b>  | cold up vs hot |
| MARS2     | 3.32E-05    | 8.57E-05    | 1.29118 | <b>1.29118</b> | cold up vs hot |
| ISG20L2   | 1.82E-05    | 4.93E-05    | 1.29083 | <b>1.29083</b> | cold up vs hot |
| LOC221710 | 0.000485138 | 0.000952035 | 1.2908  | <b>1.2908</b>  | cold up vs hot |
| OSTCL     | 0.00199161  | 0.00325616  | 1.29069 | <b>1.29069</b> | cold up vs hot |
| L2HGDH    | 0.000974748 | 0.00176082  | 1.29046 | <b>1.29046</b> | cold up vs hot |
| WDR12     | 1.91E-05    | 5.18E-05    | 1.29037 | <b>1.29037</b> | cold up vs hot |
| SPPL2B    | 0.00132188  | 0.00228906  | 1.29031 | <b>1.29031</b> | cold up vs hot |
| EXD2      | 3.77E-06    | 1.15E-05    | 1.29028 | <b>1.29028</b> | cold up vs hot |
| DVL1      | 0.000807488 | 0.00149509  | 1.29027 | <b>1.29027</b> | cold up vs hot |
| C19orf23  | 0.00395815  | 0.00583941  | 1.29004 | <b>1.29004</b> | cold up vs hot |
| ZKSCAN3   | 0.000626617 | 0.00119443  | 1.28992 | <b>1.28992</b> | cold up vs hot |
| DDX49     | 1.41E-05    | 3.90E-05    | 1.28983 | <b>1.28983</b> | cold up vs hot |
| SREBF2    | 0.00173113  | 0.00288081  | 1.28916 | <b>1.28916</b> | cold up vs hot |
| NTHL1     | 0.000472061 | 0.000930966 | 1.28908 | <b>1.28908</b> | cold up vs hot |
| CRAMP1L   | 1.00E-06    | 3.34E-06    | 1.28907 | <b>1.28907</b> | cold up vs hot |
| ANKRD52   | 5.82E-05    | 0.000143806 | 1.28899 | <b>1.28899</b> | cold up vs hot |
| EI24      | 3.85E-06    | 1.17E-05    | 1.28852 | <b>1.28852</b> | cold up vs hot |
| ZCCHC14   | 4.48E-05    | 0.000113379 | 1.28844 | <b>1.28844</b> | cold up vs hot |
| MTR       | 0.000220669 | 0.000469897 | 1.2884  | <b>1.2884</b>  | cold up vs hot |
| EIF2C2    | 8.31E-05    | 0.000198254 | 1.28837 | <b>1.28837</b> | cold up vs hot |
| SS18L1    | 0.00276889  | 0.00430585  | 1.28785 | <b>1.28785</b> | cold up vs hot |
| ANAPC1    | 6.96E-05    | 0.000169106 | 1.28775 | <b>1.28775</b> | cold up vs hot |
| GRWD1     | 1.77E-06    | 5.69E-06    | 1.28688 | <b>1.28688</b> | cold up vs hot |
| KIAA1737  | 0.000123873 | 0.000284856 | 1.28685 | <b>1.28685</b> | cold up vs hot |
| POGK      | 2.23E-06    | 7.03E-06    | 1.28663 | <b>1.28663</b> | cold up vs hot |
| G2E3      | 0.00561358  | 0.00778206  | 1.28651 | <b>1.28651</b> | cold up vs hot |
| TRAF4     | 0.000860481 | 0.00157977  | 1.28631 | <b>1.28631</b> | cold up vs hot |
| ERCC1     | 7.97E-05    | 0.000191035 | 1.28617 | <b>1.28617</b> | cold up vs hot |
| RNF160    | 0.00505967  | 0.00714778  | 1.28542 | <b>1.28542</b> | cold up vs hot |
| ZNF124    | 0.00542944  | 0.00757669  | 1.28521 | <b>1.28521</b> | cold up vs hot |
| FEM1A     | 9.23E-08    | 3.46E-07    | 1.28444 | <b>1.28444</b> | cold up vs hot |

|           |             |             |         |                |                |
|-----------|-------------|-------------|---------|----------------|----------------|
| ZBTB8A    | 0.00667558  | 0.00902804  | 1.28429 | <b>1.28429</b> | cold up vs hot |
| IPO7      | 0.000642803 | 0.00121994  | 1.28422 | <b>1.28422</b> | cold up vs hot |
| COMT      | 0.00416047  | 0.0060788   | 1.28386 | <b>1.28386</b> | cold up vs hot |
| ZNF669    | 0.0016819   | 0.00280962  | 1.28368 | <b>1.28368</b> | cold up vs hot |
| AIMP2     | 2.12E-05    | 5.70E-05    | 1.28338 | <b>1.28338</b> | cold up vs hot |
| BTBD2     | 0.00113307  | 0.00200574  | 1.28288 | <b>1.28288</b> | cold up vs hot |
| GALNT2    | 0.00245768  | 0.00388201  | 1.28283 | <b>1.28283</b> | cold up vs hot |
| C1orf131  | 0.00051947  | 0.00101267  | 1.28271 | <b>1.28271</b> | cold up vs hot |
| MARVELD1  | 0.00515439  | 0.0072549   | 1.2827  | <b>1.2827</b>  | cold up vs hot |
| KIAA0090  | 0.000176003 | 0.000385603 | 1.28269 | <b>1.28269</b> | cold up vs hot |
| PAK4      | 0.000901161 | 0.00164382  | 1.28269 | <b>1.28269</b> | cold up vs hot |
| SAMD1     | 0.000386222 | 0.000776091 | 1.28265 | <b>1.28265</b> | cold up vs hot |
| C14orf104 | 0.000167306 | 0.000369026 | 1.28262 | <b>1.28262</b> | cold up vs hot |
| RIOK1     | 0.000178736 | 0.000390673 | 1.28247 | <b>1.28247</b> | cold up vs hot |
| ADNP      | 1.69E-06    | 5.44E-06    | 1.28206 | <b>1.28206</b> | cold up vs hot |
| ZNF614    | 0.0068362   | 0.0092147   | 1.28197 | <b>1.28197</b> | cold up vs hot |
| PRKCSH    | 9.08E-06    | 2.61E-05    | 1.28192 | <b>1.28192</b> | cold up vs hot |
| LOC344595 | 0.00653857  | 0.00886377  | 1.28191 | <b>1.28191</b> | cold up vs hot |
| ATRN      | 3.01E-06    | 9.33E-06    | 1.28187 | <b>1.28187</b> | cold up vs hot |
| LDOC1L    | 0.00340343  | 0.0051431   | 1.28176 | <b>1.28176</b> | cold up vs hot |
| RPS2      | 0.000716275 | 0.00134297  | 1.28145 | <b>1.28145</b> | cold up vs hot |
| USP22     | 1.20E-05    | 3.38E-05    | 1.28143 | <b>1.28143</b> | cold up vs hot |
| PRMT1     | 5.11E-06    | 1.52E-05    | 1.28086 | <b>1.28086</b> | cold up vs hot |
| ALDH6A1   | 0.00576603  | 0.00795162  | 1.28051 | <b>1.28051</b> | cold up vs hot |
| GNL3      | 0.000163401 | 0.000362497 | 1.28049 | <b>1.28049</b> | cold up vs hot |
| HSPH1     | 0.00139179  | 0.00238857  | 1.28045 | <b>1.28045</b> | cold up vs hot |
| P DPR     | 0.000941123 | 0.00170542  | 1.28032 | <b>1.28032</b> | cold up vs hot |
| POLR1C    | 5.38E-05    | 0.000133833 | 1.28004 | <b>1.28004</b> | cold up vs hot |
| CDC34     | 8.12E-05    | 0.000194382 | 1.28001 | <b>1.28001</b> | cold up vs hot |
| NOP56     | 1.20E-06    | 3.93E-06    | 1.27983 | <b>1.27983</b> | cold up vs hot |
| SNAPC2    | 0.000253176 | 0.000531831 | 1.27979 | <b>1.27979</b> | cold up vs hot |
| UTP23     | 0.0013383   | 0.0023132   | 1.27979 | <b>1.27979</b> | cold up vs hot |
| NAA16     | 0.00397565  | 0.00585887  | 1.27953 | <b>1.27953</b> | cold up vs hot |
| TSR1      | 9.38E-06    | 2.68E-05    | 1.27916 | <b>1.27916</b> | cold up vs hot |
| COG6      | 0.00404829  | 0.00594016  | 1.27876 | <b>1.27876</b> | cold up vs hot |
| CIRH1A    | 3.30E-06    | 1.01E-05    | 1.27849 | <b>1.27849</b> | cold up vs hot |
| SLC25A13  | 0.00474857  | 0.0067921   | 1.27838 | <b>1.27838</b> | cold up vs hot |
| TIMM44    | 8.51E-07    | 2.86E-06    | 1.27809 | <b>1.27809</b> | cold up vs hot |
| RPL13AP20 | 0.000796848 | 0.00147791  | 1.27802 | <b>1.27802</b> | cold up vs hot |
| ZNF559    | 0.00100283  | 0.00180356  | 1.27802 | <b>1.27802</b> | cold up vs hot |
| CBX5      | 0.000206972 | 0.000445233 | 1.27794 | <b>1.27794</b> | cold up vs hot |
| DUS3L     | 0.000186864 | 0.000406128 | 1.27726 | <b>1.27726</b> | cold up vs hot |
| EIF4B     | 6.60E-05    | 0.000161154 | 1.27693 | <b>1.27693</b> | cold up vs hot |
| ZNF629    | 0.000821246 | 0.00151709  | 1.27673 | <b>1.27673</b> | cold up vs hot |
| HSBP1     | 0.000278868 | 0.000580752 | 1.2767  | <b>1.2767</b>  | cold up vs hot |
| CLK2P     | 0.000813968 | 0.00150581  | 1.27646 | <b>1.27646</b> | cold up vs hot |
| ZNF250    | 0.000162187 | 0.000360539 | 1.27638 | <b>1.27638</b> | cold up vs hot |
| TROVE2    | 0.00380272  | 0.00564716  | 1.27546 | <b>1.27546</b> | cold up vs hot |
| TCF7L2    | 0.000192128 | 0.000416458 | 1.27538 | <b>1.27538</b> | cold up vs hot |
| LOC645332 | 0.00114945  | 0.00203017  | 1.27528 | <b>1.27528</b> | cold up vs hot |
| PPPDE1    | 2.23E-05    | 5.95E-05    | 1.27516 | <b>1.27516</b> | cold up vs hot |
| IQCE      | 0.00137334  | 0.00236189  | 1.27506 | <b>1.27506</b> | cold up vs hot |
| DIS3      | 0.000228113 | 0.00048354  | 1.2749  | <b>1.2749</b>  | cold up vs hot |
| RPS15     | 0.000869943 | 0.00159445  | 1.2749  | <b>1.2749</b>  | cold up vs hot |
| MAPK8     | 0.00251771  | 0.00396053  | 1.27471 | <b>1.27471</b> | cold up vs hot |
| C18orf55  | 4.38E-06    | 1.32E-05    | 1.27468 | <b>1.27468</b> | cold up vs hot |
| RPL17     | 0.000582984 | 0.00111943  | 1.27456 | <b>1.27456</b> | cold up vs hot |
| AKAP1     | 5.61E-05    | 0.000138944 | 1.27429 | <b>1.27429</b> | cold up vs hot |
| BBS10     | 0.00248112  | 0.00391009  | 1.27412 | <b>1.27412</b> | cold up vs hot |
| KIAA0753  | 0.000566752 | 0.00109244  | 1.27405 | <b>1.27405</b> | cold up vs hot |
| ZNF584    | 7.98E-07    | 2.69E-06    | 1.27393 | <b>1.27393</b> | cold up vs hot |
| CDC42BPA  | 0.00402297  | 0.00591232  | 1.27365 | <b>1.27365</b> | cold up vs hot |
| LPPR2     | 0.00513415  | 0.00723735  | 1.27349 | <b>1.27349</b> | cold up vs hot |
| NOMO1     | 0.000468737 | 0.000925375 | 1.27335 | <b>1.27335</b> | cold up vs hot |
| PHC1      | 0.000892194 | 0.00162792  | 1.27321 | <b>1.27321</b> | cold up vs hot |
| VPS37B    | 0.000152921 | 0.000342352 | 1.2732  | <b>1.2732</b>  | cold up vs hot |
| LLGL1     | 0.000144932 | 0.000326857 | 1.27294 | <b>1.27294</b> | cold up vs hot |
| ACVR2A    | 0.00191908  | 0.00314941  | 1.27279 | <b>1.27279</b> | cold up vs hot |
| TRMT1     | 1.24E-05    | 3.48E-05    | 1.27267 | <b>1.27267</b> | cold up vs hot |
| OTUD6B    | 0.0055867   | 0.00774973  | 1.27267 | <b>1.27267</b> | cold up vs hot |
| POLI      | 0.00727769  | 0.00969566  | 1.27267 | <b>1.27267</b> | cold up vs hot |
| TTC5      | 1.01E-05    | 2.86E-05    | 1.27252 | <b>1.27252</b> | cold up vs hot |
| NOTCH2    | 0.00303276  | 0.00466176  | 1.27252 | <b>1.27252</b> | cold up vs hot |
| RPL29     | 0.000801908 | 0.00148603  | 1.2725  | <b>1.2725</b>  | cold up vs hot |
| SUPT3H    | 0.00462489  | 0.00664724  | 1.27218 | <b>1.27218</b> | cold up vs hot |
| EFHC1     | 0.00503896  | 0.00712624  | 1.27208 | <b>1.27208</b> | cold up vs hot |
| CRY1      | 0.000687071 | 0.0012923   | 1.2719  | <b>1.2719</b>  | cold up vs hot |

|          |             |             |         |                |                |
|----------|-------------|-------------|---------|----------------|----------------|
| PABPC3   | 0.00171191  | 0.00285392  | 1.27185 | <b>1.27185</b> | cold up vs hot |
| MKI67IP  | 1.10E-05    | 3.11E-05    | 1.27176 | <b>1.27176</b> | cold up vs hot |
| POLR1E   | 0.000212377 | 0.000455659 | 1.27163 | <b>1.27163</b> | cold up vs hot |
| PDE8A    | 0.000962244 | 0.00174064  | 1.27161 | <b>1.27161</b> | cold up vs hot |
| CSNK2A1  | 1.70E-06    | 5.48E-06    | 1.27156 | <b>1.27156</b> | cold up vs hot |
| POP1     | 0.000863197 | 0.00158431  | 1.27118 | <b>1.27118</b> | cold up vs hot |
| KLHDC5   | 2.77E-05    | 7.27E-05    | 1.27111 | <b>1.27111</b> | cold up vs hot |
| PPM1F    | 0.000153028 | 0.000342395 | 1.27109 | <b>1.27109</b> | cold up vs hot |
| RANBP1   | 9.82E-05    | 0.000230542 | 1.27097 | <b>1.27097</b> | cold up vs hot |
| USP13    | 0.00211587  | 0.00342584  | 1.27091 | <b>1.27091</b> | cold up vs hot |
| RPL4     | 0.000467287 | 0.00092363  | 1.27082 | <b>1.27082</b> | cold up vs hot |
| RPL23P8  | 0.000884649 | 0.00161686  | 1.27073 | <b>1.27073</b> | cold up vs hot |
| HSPBP1   | 0.000758747 | 0.00141286  | 1.27018 | <b>1.27018</b> | cold up vs hot |
| ALDH18A1 | 1.21E-06    | 3.96E-06    | 1.2699  | <b>1.2699</b>  | cold up vs hot |
| MBD3     | 0.00322284  | 0.00491439  | 1.26944 | <b>1.26944</b> | cold up vs hot |
| ZNF561   | 3.82E-05    | 9.78E-05    | 1.2693  | <b>1.2693</b>  | cold up vs hot |
| IFRD2    | 2.57E-05    | 6.81E-05    | 1.26916 | <b>1.26916</b> | cold up vs hot |
| RPL3     | 0.000163151 | 0.000362411 | 1.26864 | <b>1.26864</b> | cold up vs hot |
| EXOSC5   | 0.00136038  | 0.0023433   | 1.26854 | <b>1.26854</b> | cold up vs hot |
| CCT2     | 0.000195852 | 0.000423406 | 1.26842 | <b>1.26842</b> | cold up vs hot |
| GNPNAT1  | 0.000155513 | 0.000347477 | 1.26823 | <b>1.26823</b> | cold up vs hot |
| CTBP2    | 0.000149467 | 0.000335692 | 1.26771 | <b>1.26771</b> | cold up vs hot |
| LDHB     | 0.00128274  | 0.00222838  | 1.26735 | <b>1.26735</b> | cold up vs hot |
| SMARCAD1 | 0.00583032  | 0.00803135  | 1.26719 | <b>1.26719</b> | cold up vs hot |
| MED20    | 9.14E-05    | 0.000216322 | 1.26711 | <b>1.26711</b> | cold up vs hot |
| PRMT3    | 0.00135295  | 0.00233317  | 1.267   | <b>1.267</b>   | cold up vs hot |
| RRP1B    | 5.99E-06    | 1.76E-05    | 1.26672 | <b>1.26672</b> | cold up vs hot |
| SNHG6    | 0.00618675  | 0.00843847  | 1.26653 | <b>1.26653</b> | cold up vs hot |
| MRPL45   | 2.94E-06    | 9.13E-06    | 1.26635 | <b>1.26635</b> | cold up vs hot |
| AGPAT5   | 0.00187502  | 0.00308278  | 1.26565 | <b>1.26565</b> | cold up vs hot |
| SGTA     | 3.32E-05    | 8.56E-05    | 1.2655  | <b>1.2655</b>  | cold up vs hot |
| ZSCAN20  | 5.99E-05    | 0.000147528 | 1.26548 | <b>1.26548</b> | cold up vs hot |
| AEN      | 0.00282122  | 0.00437575  | 1.26539 | <b>1.26539</b> | cold up vs hot |
| CAPN2    | 0.000482961 | 0.000948293 | 1.26534 | <b>1.26534</b> | cold up vs hot |
| LSM11    | 0.00111483  | 0.00197775  | 1.26534 | <b>1.26534</b> | cold up vs hot |
| RPS3     | 0.00265816  | 0.00415345  | 1.26531 | <b>1.26531</b> | cold up vs hot |
| PREPL    | 0.000492555 | 0.000965679 | 1.26516 | <b>1.26516</b> | cold up vs hot |
| MYL6B    | 0.000219111 | 0.000467645 | 1.26502 | <b>1.26502</b> | cold up vs hot |
| AASDHPTT | 0.000313425 | 0.000644291 | 1.26478 | <b>1.26478</b> | cold up vs hot |
| IARS     | 6.06E-05    | 0.000149018 | 1.26477 | <b>1.26477</b> | cold up vs hot |
| IARS2    | 3.07E-05    | 8.00E-05    | 1.26465 | <b>1.26465</b> | cold up vs hot |
| ADNP2    | 1.37E-05    | 3.81E-05    | 1.26462 | <b>1.26462</b> | cold up vs hot |
| NAV1     | 0.0072049   | 0.0096203   | 1.26459 | <b>1.26459</b> | cold up vs hot |
| ZNF324   | 1.06E-06    | 3.51E-06    | 1.26456 | <b>1.26456</b> | cold up vs hot |
| TRAF7    | 1.10E-05    | 3.10E-05    | 1.26454 | <b>1.26454</b> | cold up vs hot |
| DDX31    | 5.34E-06    | 1.59E-05    | 1.26452 | <b>1.26452</b> | cold up vs hot |
| SCFD2    | 0.000276851 | 0.000577103 | 1.2644  | <b>1.2644</b>  | cold up vs hot |
| TOMM34   | 0.000194302 | 0.000420582 | 1.2642  | <b>1.2642</b>  | cold up vs hot |
| MYO19    | 0.000112154 | 0.000260216 | 1.26408 | <b>1.26408</b> | cold up vs hot |
| PSMB5    | 2.83E-06    | 8.81E-06    | 1.26402 | <b>1.26402</b> | cold up vs hot |
| EIF3CL   | 0.0072222   | 0.0096355   | 1.26368 | <b>1.26368</b> | cold up vs hot |
| NAA25    | 5.04E-05    | 0.000126197 | 1.26347 | <b>1.26347</b> | cold up vs hot |
| KIAA1704 | 0.00323154  | 0.00492324  | 1.26336 | <b>1.26336</b> | cold up vs hot |
| POLR3A   | 0.000137118 | 0.00031117  | 1.26319 | <b>1.26319</b> | cold up vs hot |
| MCM4     | 0.00185383  | 0.00305538  | 1.26299 | <b>1.26299</b> | cold up vs hot |
| PHF20L1  | 0.00160904  | 0.00270522  | 1.26261 | <b>1.26261</b> | cold up vs hot |
| INTS1    | 0.00153685  | 0.00260059  | 1.26242 | <b>1.26242</b> | cold up vs hot |
| OSBPL1A  | 0.00300241  | 0.00461945  | 1.26202 | <b>1.26202</b> | cold up vs hot |
| IFT140   | 0.00055837  | 0.00107915  | 1.26181 | <b>1.26181</b> | cold up vs hot |
| ZNF497   | 0.00357192  | 0.00535413  | 1.2617  | <b>1.2617</b>  | cold up vs hot |
| FBL      | 0.000439538 | 0.000873543 | 1.26157 | <b>1.26157</b> | cold up vs hot |
| VKORC1   | 0.000165387 | 0.000366031 | 1.26142 | <b>1.26142</b> | cold up vs hot |
| TCF3     | 0.00041526  | 0.000830095 | 1.26101 | <b>1.26101</b> | cold up vs hot |
| C2orf3   | 0.00101956  | 0.00182862  | 1.26069 | <b>1.26069</b> | cold up vs hot |
| LOC90784 | 0.000218675 | 0.000467022 | 1.26037 | <b>1.26037</b> | cold up vs hot |
| KIAA0664 | 0.00141753  | 0.0024251   | 1.26037 | <b>1.26037</b> | cold up vs hot |
| SPRED2   | 5.25E-05    | 0.000130927 | 1.26015 | <b>1.26015</b> | cold up vs hot |
| CAMSAP1  | 1.56E-05    | 4.29E-05    | 1.25976 | <b>1.25976</b> | cold up vs hot |
| MLLT1    | 0.000143575 | 0.000324245 | 1.25889 | <b>1.25889</b> | cold up vs hot |
| MRPL4    | 0.000234341 | 0.000496097 | 1.25887 | <b>1.25887</b> | cold up vs hot |
| C1QBP    | 0.000167259 | 0.000369026 | 1.2588  | <b>1.2588</b>  | cold up vs hot |
| UBQLN4   | 5.06E-05    | 0.000126601 | 1.25863 | <b>1.25863</b> | cold up vs hot |
| ZNF197   | 0.0050531   | 0.00714159  | 1.25846 | <b>1.25846</b> | cold up vs hot |
| BICD1    | 0.00631427  | 0.0085964   | 1.25838 | <b>1.25838</b> | cold up vs hot |
| RRP1     | 6.34E-05    | 0.00015534  | 1.25804 | <b>1.25804</b> | cold up vs hot |
| STK36    | 0.000136891 | 0.000310763 | 1.25799 | <b>1.25799</b> | cold up vs hot |
| QSOX2    | 8.43E-05    | 0.000200743 | 1.2564  | <b>1.2564</b>  | cold up vs hot |

|           |             |             |         |                |                |
|-----------|-------------|-------------|---------|----------------|----------------|
| CTU1      | 0.00361716  | 0.00541303  | 1.25623 | <b>1.25623</b> | cold up vs hot |
| C1orf109  | 9.38E-05    | 0.000221251 | 1.25613 | <b>1.25613</b> | cold up vs hot |
| NOLC1     | 6.98E-05    | 0.000169641 | 1.25596 | <b>1.25596</b> | cold up vs hot |
| ZNF599    | 0.00111679  | 0.00198069  | 1.25562 | <b>1.25562</b> | cold up vs hot |
| PHF14     | 0.000933481 | 0.00169331  | 1.25523 | <b>1.25523</b> | cold up vs hot |
| SLC35E1   | 2.68E-09    | 1.17E-08    | 1.25513 | <b>1.25513</b> | cold up vs hot |
| C20orf27  | 0.00201878  | 0.00329233  | 1.25508 | <b>1.25508</b> | cold up vs hot |
| SMCR7L    | 1.08E-05    | 3.07E-05    | 1.25501 | <b>1.25501</b> | cold up vs hot |
| ZFYVE9    | 0.00109711  | 0.00195429  | 1.25489 | <b>1.25489</b> | cold up vs hot |
| RPL6      | 7.97E-05    | 0.000191035 | 1.25484 | <b>1.25484</b> | cold up vs hot |
| ZNF664    | 0.000197198 | 0.000426173 | 1.25484 | <b>1.25484</b> | cold up vs hot |
| TMX2      | 7.20E-06    | 2.09E-05    | 1.25474 | <b>1.25474</b> | cold up vs hot |
| ZNF598    | 0.000474828 | 0.000935271 | 1.2545  | <b>1.2545</b>  | cold up vs hot |
| ASH1L     | 0.00038176  | 0.000768544 | 1.25449 | <b>1.25449</b> | cold up vs hot |
| PHB2      | 3.28E-06    | 1.01E-05    | 1.25443 | <b>1.25443</b> | cold up vs hot |
| ITSN1     | 0.000123908 | 0.000284856 | 1.25364 | <b>1.25364</b> | cold up vs hot |
| CARS2     | 0.000776577 | 0.00144442  | 1.25337 | <b>1.25337</b> | cold up vs hot |
| SUPT16H   | 1.36E-05    | 3.77E-05    | 1.2532  | <b>1.2532</b>  | cold up vs hot |
| ZNHIT6    | 0.000202161 | 0.000435746 | 1.25316 | <b>1.25316</b> | cold up vs hot |
| BCS1L     | 2.44E-06    | 7.68E-06    | 1.25306 | <b>1.25306</b> | cold up vs hot |
| ILF3      | 1.72E-10    | 8.32E-10    | 1.25297 | <b>1.25297</b> | cold up vs hot |
| GART      | 1.17E-05    | 3.28E-05    | 1.25296 | <b>1.25296</b> | cold up vs hot |
| CDC42BPB  | 0.000150516 | 0.000337795 | 1.25286 | <b>1.25286</b> | cold up vs hot |
| SAMD4B    | 8.40E-06    | 2.42E-05    | 1.25279 | <b>1.25279</b> | cold up vs hot |
| PPAT      | 0.00176855  | 0.00293112  | 1.25278 | <b>1.25278</b> | cold up vs hot |
| WDR74     | 4.85E-05    | 0.000121706 | 1.25262 | <b>1.25262</b> | cold up vs hot |
| LOC653113 | 0.00398982  | 0.00587418  | 1.25241 | <b>1.25241</b> | cold up vs hot |
| LYRM4     | 0.000129514 | 0.000295662 | 1.2524  | <b>1.2524</b>  | cold up vs hot |
| CCDC77    | 0.000244227 | 0.000514356 | 1.2522  | <b>1.2522</b>  | cold up vs hot |
| ZNF295    | 0.0042612   | 0.00620417  | 1.25212 | <b>1.25212</b> | cold up vs hot |
| PRR3      | 0.00271196  | 0.00422537  | 1.2518  | <b>1.2518</b>  | cold up vs hot |
| PHLDB1    | 0.00669209  | 0.00904849  | 1.2518  | <b>1.2518</b>  | cold up vs hot |
| ZNF7      | 6.22E-05    | 0.000152477 | 1.25169 | <b>1.25169</b> | cold up vs hot |
| SLC39A9   | 4.95E-06    | 1.48E-05    | 1.25129 | <b>1.25129</b> | cold up vs hot |
| KHSRP     | 1.20E-05    | 3.38E-05    | 1.2512  | <b>1.2512</b>  | cold up vs hot |
| CRK       | 9.81E-06    | 2.79E-05    | 1.25054 | <b>1.25054</b> | cold up vs hot |
| CFDP1     | 0.000181831 | 0.000396244 | 1.2504  | <b>1.2504</b>  | cold up vs hot |
| RRP12     | 0.000695348 | 0.00130636  | 1.25034 | <b>1.25034</b> | cold up vs hot |
| ESRRA     | 0.0019381   | 0.00317663  | 1.25032 | <b>1.25032</b> | cold up vs hot |
| ABCD3     | 0.00385377  | 0.00570604  | 1.25032 | <b>1.25032</b> | cold up vs hot |
| IMPACT    | 0.00148529  | 0.0025271   | 1.25015 | <b>1.25015</b> | cold up vs hot |
| EIF3B     | 6.15E-05    | 0.000151072 | 1.24999 | <b>1.24999</b> | cold up vs hot |
| METAP2    | 5.34E-05    | 0.000132854 | 1.2499  | <b>1.2499</b>  | cold up vs hot |
| TMEM201   | 0.00232066  | 0.00370412  | 1.24973 | <b>1.24973</b> | cold up vs hot |
| ATP5B     | 0.000164781 | 0.000365061 | 1.24959 | <b>1.24959</b> | cold up vs hot |
| PPME1     | 8.21E-05    | 0.000196297 | 1.24954 | <b>1.24954</b> | cold up vs hot |
| TWISTNB   | 0.0017126   | 0.00285433  | 1.24906 | <b>1.24906</b> | cold up vs hot |
| RABGGTB   | 0.000839123 | 0.00154577  | 1.24844 | <b>1.24844</b> | cold up vs hot |
| CTPS      | 0.0011458   | 0.00202443  | 1.24838 | <b>1.24838</b> | cold up vs hot |
| GNB2L1    | 0.00112413  | 0.00199208  | 1.24802 | <b>1.24802</b> | cold up vs hot |
| POLR3B    | 0.00021258  | 0.000455795 | 1.24799 | <b>1.24799</b> | cold up vs hot |
| TMEM181   | 0.00436949  | 0.00633316  | 1.24778 | <b>1.24778</b> | cold up vs hot |
| RSL1D1    | 1.41E-05    | 3.90E-05    | 1.24759 | <b>1.24759</b> | cold up vs hot |
| TSHZ1     | 0.000625023 | 0.00119174  | 1.24759 | <b>1.24759</b> | cold up vs hot |
| TYW3      | 0.000501076 | 0.000980323 | 1.24751 | <b>1.24751</b> | cold up vs hot |
| MTMR2     | 0.000870509 | 0.00159504  | 1.24736 | <b>1.24736</b> | cold up vs hot |
| ZCCHC3    | 0.00010102  | 0.00181431  | 1.24711 | <b>1.24711</b> | cold up vs hot |
| KIAA1609  | 9.73E-05    | 0.000228711 | 1.24698 | <b>1.24698</b> | cold up vs hot |
| RCBTB1    | 0.00325785  | 0.00495755  | 1.24691 | <b>1.24691</b> | cold up vs hot |
| C8orf38   | 0.00177307  | 0.00293711  | 1.24651 | <b>1.24651</b> | cold up vs hot |
| PLA2G12A  | 0.00131611  | 0.00228067  | 1.24622 | <b>1.24622</b> | cold up vs hot |
| NMD3      | 0.00329687  | 0.00500758  | 1.24579 | <b>1.24579</b> | cold up vs hot |
| ZNF445    | 4.86E-05    | 0.000121939 | 1.2457  | <b>1.2457</b>  | cold up vs hot |
| NEIL2     | 0.000744689 | 0.00139145  | 1.24556 | <b>1.24556</b> | cold up vs hot |
| ZNF57     | 0.000413863 | 0.000827557 | 1.24544 | <b>1.24544</b> | cold up vs hot |
| MRPS2     | 0.00726232  | 0.00967913  | 1.24532 | <b>1.24532</b> | cold up vs hot |
| C19orf55  | 0.000152336 | 0.000341431 | 1.24526 | <b>1.24526</b> | cold up vs hot |
| TTC8      | 0.00210983  | 0.00341841  | 1.2448  | <b>1.2448</b>  | cold up vs hot |
| LIG3      | 0.000181674 | 0.000396035 | 1.24438 | <b>1.24438</b> | cold up vs hot |
| C21orf57  | 0.00416369  | 0.00608214  | 1.24429 | <b>1.24429</b> | cold up vs hot |
| MAK16     | 0.0072747   | 0.00969366  | 1.24424 | <b>1.24424</b> | cold up vs hot |
| AP3D1     | 2.02E-06    | 6.43E-06    | 1.24408 | <b>1.24408</b> | cold up vs hot |
| NCL       | 4.99E-07    | 1.73E-06    | 1.24344 | <b>1.24344</b> | cold up vs hot |
| YLPM1     | 1.16E-05    | 3.28E-05    | 1.24337 | <b>1.24337</b> | cold up vs hot |
| NME7      | 0.00116127  | 0.00204844  | 1.2431  | <b>1.2431</b>  | cold up vs hot |
| ZBTB45    | 0.000824344 | 0.00152154  | 1.24296 | <b>1.24296</b> | cold up vs hot |
| CCDC123   | 2.73E-05    | 7.17E-05    | 1.24287 | <b>1.24287</b> | cold up vs hot |

|           |             |             |         |                |                |
|-----------|-------------|-------------|---------|----------------|----------------|
| C13orf37  | 0.00545299  | 0.00760305  | 1.2428  | <b>1.2428</b>  | cold up vs hot |
| RPS10     | 0.00231191  | 0.00369197  | 1.24267 | <b>1.24267</b> | cold up vs hot |
| FERMT2    | 0.00744265  | 0.00987913  | 1.24198 | <b>1.24198</b> | cold up vs hot |
| LRRC58    | 0.00234594  | 0.00373354  | 1.24181 | <b>1.24181</b> | cold up vs hot |
| CDYL      | 0.00192496  | 0.00315747  | 1.24172 | <b>1.24172</b> | cold up vs hot |
| ZNF16     | 6.68E-05    | 0.0001627   | 1.24141 | <b>1.24141</b> | cold up vs hot |
| ERC1      | 0.00237003  | 0.00376452  | 1.24141 | <b>1.24141</b> | cold up vs hot |
| NFKBIL1   | 0.00087397  | 0.00160048  | 1.24123 | <b>1.24123</b> | cold up vs hot |
| C4orf14   | 3.10E-05    | 8.05E-05    | 1.24073 | <b>1.24073</b> | cold up vs hot |
| TAF11     | 0.00099113  | 0.00178646  | 1.24069 | <b>1.24069</b> | cold up vs hot |
| DHX34     | 0.00063504  | 0.00120801  | 1.24014 | <b>1.24014</b> | cold up vs hot |
| RPL27     | 0.000726553 | 0.0013599   | 1.24014 | <b>1.24014</b> | cold up vs hot |
| SLC25A3   | 6.18E-06    | 1.81E-05    | 1.23998 | <b>1.23998</b> | cold up vs hot |
| KAT2A     | 0.00114292  | 0.00201989  | 1.2399  | <b>1.2399</b>  | cold up vs hot |
| ZNF397    | 0.00695512  | 0.0093422   | 1.23976 | <b>1.23976</b> | cold up vs hot |
| LSM7      | 0.00173717  | 0.00288938  | 1.23968 | <b>1.23968</b> | cold up vs hot |
| RAD18     | 0.0037897   | 0.00563034  | 1.23956 | <b>1.23956</b> | cold up vs hot |
| JARID2    | 0.00496963  | 0.00705265  | 1.2395  | <b>1.2395</b>  | cold up vs hot |
| RBM26     | 0.000750557 | 0.00140121  | 1.23941 | <b>1.23941</b> | cold up vs hot |
| ZNF517    | 0.00368692  | 0.00550144  | 1.23925 | <b>1.23925</b> | cold up vs hot |
| C2orf86   | 0.00138317  | 0.00237691  | 1.2392  | <b>1.2392</b>  | cold up vs hot |
| SMYD3     | 0.00184147  | 0.00303745  | 1.23919 | <b>1.23919</b> | cold up vs hot |
| AGBL5     | 0.000434766 | 0.000865378 | 1.23909 | <b>1.23909</b> | cold up vs hot |
| SETDB1    | 0.000453217 | 0.000897995 | 1.23889 | <b>1.23889</b> | cold up vs hot |
| DYM       | 1.21E-05    | 3.39E-05    | 1.23885 | <b>1.23885</b> | cold up vs hot |
| TNKS1BP1  | 0.00128052  | 0.0022263   | 1.23876 | <b>1.23876</b> | cold up vs hot |
| TMEM33    | 9.05E-05    | 0.000214432 | 1.23874 | <b>1.23874</b> | cold up vs hot |
| MRPL15    | 0.000663159 | 0.00125347  | 1.23864 | <b>1.23864</b> | cold up vs hot |
| C16orf55  | 0.000934908 | 0.00169542  | 1.23847 | <b>1.23847</b> | cold up vs hot |
| KDM4B     | 0.000153843 | 0.0003441   | 1.23813 | <b>1.23813</b> | cold up vs hot |
| SRD5A1    | 0.00352567  | 0.00530049  | 1.23811 | <b>1.23811</b> | cold up vs hot |
| ZNF579    | 0.00359316  | 0.00538245  | 1.23801 | <b>1.23801</b> | cold up vs hot |
| LEPRE1    | 0.00449658  | 0.0064871   | 1.23783 | <b>1.23783</b> | cold up vs hot |
| VARS2     | 0.00101838  | 0.0018275   | 1.23771 | <b>1.23771</b> | cold up vs hot |
| TASP1     | 0.00096808  | 0.00174975  | 1.23769 | <b>1.23769</b> | cold up vs hot |
| CCDC51    | 0.000265126 | 0.000554613 | 1.23747 | <b>1.23747</b> | cold up vs hot |
| C11orf57  | 0.00125275  | 0.00218267  | 1.23744 | <b>1.23744</b> | cold up vs hot |
| DCAF13    | 0.00202132  | 0.00329483  | 1.23724 | <b>1.23724</b> | cold up vs hot |
| CEBPZ     | 0.00586124  | 0.00806714  | 1.23671 | <b>1.23671</b> | cold up vs hot |
| PCGF2     | 0.00232779  | 0.00371074  | 1.23664 | <b>1.23664</b> | cold up vs hot |
| RPS7      | 0.0029782   | 0.00458761  | 1.23635 | <b>1.23635</b> | cold up vs hot |
| LOC728643 | 0.000319557 | 0.000655449 | 1.23634 | <b>1.23634</b> | cold up vs hot |
| C4orf43   | 0.000359381 | 0.000727306 | 1.23621 | <b>1.23621</b> | cold up vs hot |
| POFUT1    | 1.51E-05    | 4.15E-05    | 1.23614 | <b>1.23614</b> | cold up vs hot |
| RSL24D1   | 0.00571562  | 0.00789579  | 1.23596 | <b>1.23596</b> | cold up vs hot |
| NOB1      | 9.22E-06    | 2.64E-05    | 1.23566 | <b>1.23566</b> | cold up vs hot |
| ATF2      | 0.00514654  | 0.00724707  | 1.23562 | <b>1.23562</b> | cold up vs hot |
| XPOT      | 0.00344789  | 0.00520065  | 1.23556 | <b>1.23556</b> | cold up vs hot |
| RPS17     | 0.00403653  | 0.00592557  | 1.23508 | <b>1.23508</b> | cold up vs hot |
| DCAF4     | 0.00163518  | 0.00274564  | 1.23464 | <b>1.23464</b> | cold up vs hot |
| IDI2      | 0.00243055  | 0.0038494   | 1.2345  | <b>1.2345</b>  | cold up vs hot |
| GANAB     | 0.000180667 | 0.000394365 | 1.23448 | <b>1.23448</b> | cold up vs hot |
| ESD       | 3.70E-05    | 9.49E-05    | 1.2342  | <b>1.2342</b>  | cold up vs hot |
| RPE       | 0.000322746 | 0.00066116  | 1.23416 | <b>1.23416</b> | cold up vs hot |
| MBTPS2    | 0.00313774  | 0.00480728  | 1.23363 | <b>1.23363</b> | cold up vs hot |
| TSEN2     | 1.00E-05    | 2.86E-05    | 1.23354 | <b>1.23354</b> | cold up vs hot |
| SDCCAG3   | 0.000159682 | 0.000355576 | 1.23347 | <b>1.23347</b> | cold up vs hot |
| UBFD1     | 4.64E-06    | 1.39E-05    | 1.23327 | <b>1.23327</b> | cold up vs hot |
| TUBGCP4   | 0.00069982  | 0.00131439  | 1.23287 | <b>1.23287</b> | cold up vs hot |
| POLDIP3   | 0.00034724  | 0.00070646  | 1.23283 | <b>1.23283</b> | cold up vs hot |
| RPL18     | 0.00361439  | 0.00541116  | 1.23268 | <b>1.23268</b> | cold up vs hot |
| PDDC1     | 0.00110254  | 0.00196127  | 1.23249 | <b>1.23249</b> | cold up vs hot |
| MICALL1   | 0.00155433  | 0.00262725  | 1.23241 | <b>1.23241</b> | cold up vs hot |
| MPP5      | 0.00694322  | 0.00933006  | 1.23221 | <b>1.23221</b> | cold up vs hot |
| RPL13A    | 0.00201194  | 0.00328501  | 1.23218 | <b>1.23218</b> | cold up vs hot |
| ZBTB39    | 0.000903201 | 0.00164616  | 1.23215 | <b>1.23215</b> | cold up vs hot |
| POLR3E    | 3.38E-06    | 1.04E-05    | 1.23214 | <b>1.23214</b> | cold up vs hot |
| RPSAP58   | 0.0010461   | 0.00187107  | 1.23204 | <b>1.23204</b> | cold up vs hot |
| TMED10P1  | 0.000908518 | 0.00165354  | 1.23187 | <b>1.23187</b> | cold up vs hot |
| HN1L      | 3.29E-06    | 1.01E-05    | 1.23181 | <b>1.23181</b> | cold up vs hot |
| PSKH1     | 0.00301558  | 0.00463753  | 1.23139 | <b>1.23139</b> | cold up vs hot |
| CLPB      | 0.00496434  | 0.00704666  | 1.23099 | <b>1.23099</b> | cold up vs hot |
| MLST8     | 0.00266209  | 0.00415858  | 1.23098 | <b>1.23098</b> | cold up vs hot |
| MSI2      | 0.00461638  | 0.00663648  | 1.23067 | <b>1.23067</b> | cold up vs hot |
| TMED1     | 0.000108336 | 0.000252166 | 1.2305  | <b>1.2305</b>  | cold up vs hot |
| LRRC8A    | 0.00345955  | 0.00521343  | 1.22996 | <b>1.22996</b> | cold up vs hot |
| IFT46     | 0.00164677  | 0.00276366  | 1.22994 | <b>1.22994</b> | cold up vs hot |

|           |             |             |         |                |                |
|-----------|-------------|-------------|---------|----------------|----------------|
| SRPK1     | 0.00268743  | 0.00419316  | 1.22993 | <b>1.22993</b> | cold up vs hot |
| RNMT      | 0.0023234   | 0.00370649  | 1.22988 | <b>1.22988</b> | cold up vs hot |
| TMEM68    | 0.00149486  | 0.00253941  | 1.22982 | <b>1.22982</b> | cold up vs hot |
| ELP2      | 0.000172919 | 0.000380123 | 1.22978 | <b>1.22978</b> | cold up vs hot |
| AFG3L2    | 0.00418857  | 0.00611301  | 1.22943 | <b>1.22943</b> | cold up vs hot |
| TAF1B     | 0.00540261  | 0.00754844  | 1.22932 | <b>1.22932</b> | cold up vs hot |
| RNASEH2A  | 0.00293619  | 0.00453253  | 1.22916 | <b>1.22916</b> | cold up vs hot |
| BRMS1L    | 0.00244356  | 0.00386345  | 1.22893 | <b>1.22893</b> | cold up vs hot |
| PABPC4    | 0.00043835  | 0.000871715 | 1.22868 | <b>1.22868</b> | cold up vs hot |
| NUP133    | 0.000291016 | 0.000602781 | 1.22859 | <b>1.22859</b> | cold up vs hot |
| ARMC6     | 0.00110622  | 0.00196622  | 1.22834 | <b>1.22834</b> | cold up vs hot |
| ZNF317    | 1.02E-08    | 4.21E-08    | 1.22828 | <b>1.22828</b> | cold up vs hot |
| ERCC2     | 0.00118528  | 0.00208156  | 1.22826 | <b>1.22826</b> | cold up vs hot |
| RNF219    | 0.00219694  | 0.00353693  | 1.22824 | <b>1.22824</b> | cold up vs hot |
| SLC35B2   | 0.00433217  | 0.00628609  | 1.22823 | <b>1.22823</b> | cold up vs hot |
| ZNF768    | 0.000266543 | 0.000556904 | 1.22776 | <b>1.22776</b> | cold up vs hot |
| PARVA     | 0.00351751  | 0.00529099  | 1.22768 | <b>1.22768</b> | cold up vs hot |
| PA2G4P4   | 0.00070421  | 0.00132225  | 1.22753 | <b>1.22753</b> | cold up vs hot |
| KIF9      | 0.0038453   | 0.00569868  | 1.22749 | <b>1.22749</b> | cold up vs hot |
| RBM8A     | 2.62E-06    | 8.19E-06    | 1.22746 | <b>1.22746</b> | cold up vs hot |
| PTOV1     | 0.000846471 | 0.00155843  | 1.22744 | <b>1.22744</b> | cold up vs hot |
| BBS1      | 0.00646819  | 0.00877848  | 1.22738 | <b>1.22738</b> | cold up vs hot |
| MRPS26    | 0.00109769  | 0.00195477  | 1.22736 | <b>1.22736</b> | cold up vs hot |
| HNRNPA1L  | 0.000167571 | 0.000369362 | 1.2273  | <b>1.2273</b>  | cold up vs hot |
| ZNF543    | 0.000498262 | 0.00097628  | 1.22711 | <b>1.22711</b> | cold up vs hot |
| INCENP    | 0.00533563  | 0.00746172  | 1.22707 | <b>1.22707</b> | cold up vs hot |
| GCN1L1    | 5.42E-05    | 0.000134686 | 1.22688 | <b>1.22688</b> | cold up vs hot |
| VPS36     | 0.00563673  | 0.0078125   | 1.22687 | <b>1.22687</b> | cold up vs hot |
| GATC      | 0.00312482  | 0.00478973  | 1.22683 | <b>1.22683</b> | cold up vs hot |
| C14orf118 | 0.00165917  | 0.00277877  | 1.22661 | <b>1.22661</b> | cold up vs hot |
| THOP1     | 0.00245733  | 0.00388201  | 1.22648 | <b>1.22648</b> | cold up vs hot |
| CCT6A     | 3.87E-05    | 9.89E-05    | 1.22604 | <b>1.22604</b> | cold up vs hot |
| KIAA1429  | 0.000348398 | 0.000708152 | 1.22595 | <b>1.22595</b> | cold up vs hot |
| GYS1      | 0.0060183   | 0.00825025  | 1.22564 | <b>1.22564</b> | cold up vs hot |
| TTL       | 0.00261376  | 0.00408897  | 1.2253  | <b>1.2253</b>  | cold up vs hot |
| SH3BP5L   | 0.00041949  | 0.000837782 | 1.22529 | <b>1.22529</b> | cold up vs hot |
| DDB1      | 0.000167221 | 0.000369026 | 1.22514 | <b>1.22514</b> | cold up vs hot |
| SBF2      | 0.0020385   | 0.00331951  | 1.22514 | <b>1.22514</b> | cold up vs hot |
| POFUT2    | 0.00176587  | 0.00292817  | 1.22491 | <b>1.22491</b> | cold up vs hot |
| AHCTF1    | 0.00268546  | 0.00419209  | 1.22486 | <b>1.22486</b> | cold up vs hot |
| TPI1      | 0.00162168  | 0.00272507  | 1.2248  | <b>1.2248</b>  | cold up vs hot |
| FUZ       | 0.00501078  | 0.007091    | 1.22467 | <b>1.22467</b> | cold up vs hot |
| ITFG3     | 0.00214726  | 0.00346978  | 1.22456 | <b>1.22456</b> | cold up vs hot |
| ZNF2      | 4.31E-06    | 1.30E-05    | 1.22453 | <b>1.22453</b> | cold up vs hot |
| EEF1E1    | 0.00120604  | 0.00211314  | 1.22413 | <b>1.22413</b> | cold up vs hot |
| RPS19     | 0.00555815  | 0.00771669  | 1.22412 | <b>1.22412</b> | cold up vs hot |
| FBXO45    | 0.00104091  | 0.00186282  | 1.22394 | <b>1.22394</b> | cold up vs hot |
| GTF3C3    | 8.29E-05    | 0.000198013 | 1.2235  | <b>1.2235</b>  | cold up vs hot |
| VAPB      | 0.000200252 | 0.000432202 | 1.22343 | <b>1.22343</b> | cold up vs hot |
| PMS2CL    | 0.00205135  | 0.00333794  | 1.22343 | <b>1.22343</b> | cold up vs hot |
| MIPEP     | 0.00150097  | 0.00254731  | 1.22341 | <b>1.22341</b> | cold up vs hot |
| BMP1      | 0.00716817  | 0.00958693  | 1.22327 | <b>1.22327</b> | cold up vs hot |
| EPRS      | 0.000528894 | 0.00102919  | 1.22282 | <b>1.22282</b> | cold up vs hot |
| HERC2     | 0.00203437  | 0.00331444  | 1.22282 | <b>1.22282</b> | cold up vs hot |
| FAM109A   | 0.0062197   | 0.00847649  | 1.22271 | <b>1.22271</b> | cold up vs hot |
| ANKRD54   | 0.0040298   | 0.00591887  | 1.22258 | <b>1.22258</b> | cold up vs hot |
| GRLF1     | 0.000146561 | 0.000330073 | 1.2223  | <b>1.2223</b>  | cold up vs hot |
| HLC5      | 0.00409272  | 0.00599861  | 1.22207 | <b>1.22207</b> | cold up vs hot |
| VGLL4     | 0.00227097  | 0.00363481  | 1.22195 | <b>1.22195</b> | cold up vs hot |
| SENP3     | 1.17E-05    | 3.31E-05    | 1.22191 | <b>1.22191</b> | cold up vs hot |
| BOD1      | 0.0006774   | 0.00127706  | 1.2218  | <b>1.2218</b>  | cold up vs hot |
| GSTCD     | 0.00717123  | 0.00958906  | 1.22164 | <b>1.22164</b> | cold up vs hot |
| POLR1D    | 0.000136535 | 0.000310062 | 1.22126 | <b>1.22126</b> | cold up vs hot |
| C16orf46  | 0.00572958  | 0.00791095  | 1.22088 | <b>1.22088</b> | cold up vs hot |
| FOXO3B    | 0.00364598  | 0.00545282  | 1.22085 | <b>1.22085</b> | cold up vs hot |
| NME1      | 0.0042118   | 0.00614143  | 1.22081 | <b>1.22081</b> | cold up vs hot |
| PIAS4     | 0.000147615 | 0.000332218 | 1.22072 | <b>1.22072</b> | cold up vs hot |
| ZFP1      | 0.00232384  | 0.00370649  | 1.22052 | <b>1.22052</b> | cold up vs hot |
| B3GALNT2  | 0.00520375  | 0.00730861  | 1.2205  | <b>1.2205</b>  | cold up vs hot |
| RAB11FIP3 | 0.000340211 | 0.000693239 | 1.21984 | <b>1.21984</b> | cold up vs hot |
| C14orf126 | 0.00103529  | 0.00185479  | 1.21982 | <b>1.21982</b> | cold up vs hot |
| KIFC3     | 0.00651318  | 0.00883403  | 1.21973 | <b>1.21973</b> | cold up vs hot |
| KATNB1    | 0.00253223  | 0.00397858  | 1.21966 | <b>1.21966</b> | cold up vs hot |
| ACBD6     | 7.61E-05    | 0.000183368 | 1.21955 | <b>1.21955</b> | cold up vs hot |
| TMEM168   | 0.0034558   | 0.00520897  | 1.21946 | <b>1.21946</b> | cold up vs hot |
| PLEKHM3   | 0.00141349  | 0.00242009  | 1.21944 | <b>1.21944</b> | cold up vs hot |
| ERGIC3    | 0.000354253 | 0.000718486 | 1.21941 | <b>1.21941</b> | cold up vs hot |

|           |             |             |         |                |                |
|-----------|-------------|-------------|---------|----------------|----------------|
| ALS2      | 0.00067678  | 0.00127626  | 1.2194  | <b>1.2194</b>  | cold up vs hot |
| DHX30     | 2.53E-05    | 6.70E-05    | 1.21933 | <b>1.21933</b> | cold up vs hot |
| DNAL4     | 0.00121534  | 0.00212714  | 1.21926 | <b>1.21926</b> | cold up vs hot |
| C20orf11  | 1.63E-05    | 4.46E-05    | 1.21908 | <b>1.21908</b> | cold up vs hot |
| C13orf1   | 0.000490055 | 0.000961066 | 1.21889 | <b>1.21889</b> | cold up vs hot |
| FANCE     | 0.00548081  | 0.00763042  | 1.21886 | <b>1.21886</b> | cold up vs hot |
| RRP9      | 0.00130089  | 0.0022557   | 1.21877 | <b>1.21877</b> | cold up vs hot |
| SYNJ2BP   | 0.00167162  | 0.00279531  | 1.21854 | <b>1.21854</b> | cold up vs hot |
| HMG20A    | 0.00398972  | 0.00587418  | 1.21822 | <b>1.21822</b> | cold up vs hot |
| ZNF565    | 0.00327637  | 0.00498108  | 1.21813 | <b>1.21813</b> | cold up vs hot |
| BRD3      | 0.00341399  | 0.00515547  | 1.21755 | <b>1.21755</b> | cold up vs hot |
| PARS2     | 0.00110488  | 0.00196476  | 1.21752 | <b>1.21752</b> | cold up vs hot |
| USP46     | 0.00160379  | 0.00269917  | 1.21749 | <b>1.21749</b> | cold up vs hot |
| INPP5A    | 0.000549064 | 0.00106337  | 1.21748 | <b>1.21748</b> | cold up vs hot |
| CUL4A     | 0.000629564 | 0.00119864  | 1.21748 | <b>1.21748</b> | cold up vs hot |
| DCUN1D5   | 0.0056854   | 0.00786827  | 1.21743 | <b>1.21743</b> | cold up vs hot |
| GTF2F1    | 6.86E-06    | 2.00E-05    | 1.21732 | <b>1.21732</b> | cold up vs hot |
| TRMT6     | 0.00272685  | 0.00424654  | 1.21718 | <b>1.21718</b> | cold up vs hot |
| CCDC43    | 0.00125727  | 0.00218937  | 1.21712 | <b>1.21712</b> | cold up vs hot |
| PPIL1     | 0.00218488  | 0.00352447  | 1.21703 | <b>1.21703</b> | cold up vs hot |
| PIAS2     | 0.000612002 | 0.00117067  | 1.21691 | <b>1.21691</b> | cold up vs hot |
| SETMAR    | 0.000610521 | 0.00116887  | 1.21687 | <b>1.21687</b> | cold up vs hot |
| ARHGGEF7  | 0.000307224 | 0.00063214  | 1.21666 | <b>1.21666</b> | cold up vs hot |
| STIP1     | 0.00057065  | 0.00109865  | 1.21663 | <b>1.21663</b> | cold up vs hot |
| EEF1B2    | 0.00243436  | 0.00385357  | 1.21648 | <b>1.21648</b> | cold up vs hot |
| COPS8     | 0.0011408   | 0.00201669  | 1.21638 | <b>1.21638</b> | cold up vs hot |
| MAP2K7    | 4.13E-05    | 0.000104958 | 1.21637 | <b>1.21637</b> | cold up vs hot |
| ILF2      | 2.09E-05    | 5.63E-05    | 1.21632 | <b>1.21632</b> | cold up vs hot |
| NOL10     | 2.99E-05    | 7.78E-05    | 1.2161  | <b>1.2161</b>  | cold up vs hot |
| SLC30A9   | 0.00098975  | 0.00178447  | 1.21605 | <b>1.21605</b> | cold up vs hot |
| DHX15     | 3.94E-05    | 0.000100572 | 1.21595 | <b>1.21595</b> | cold up vs hot |
| PSMG1     | 0.00133732  | 0.00231211  | 1.21582 | <b>1.21582</b> | cold up vs hot |
| ARHGGEF12 | 0.00444395  | 0.00642465  | 1.21579 | <b>1.21579</b> | cold up vs hot |
| EIF3H     | 0.00136272  | 0.0023467   | 1.21571 | <b>1.21571</b> | cold up vs hot |
| CTU2      | 0.00529461  | 0.00740912  | 1.21554 | <b>1.21554</b> | cold up vs hot |
| HIRA      | 8.33E-05    | 0.000198669 | 1.21543 | <b>1.21543</b> | cold up vs hot |
| IRF2BP1   | 0.00396537  | 0.00584609  | 1.21529 | <b>1.21529</b> | cold up vs hot |
| MEN1      | 0.000393437 | 0.00078986  | 1.21518 | <b>1.21518</b> | cold up vs hot |
| ZNF621    | 0.00341963  | 0.00516281  | 1.21516 | <b>1.21516</b> | cold up vs hot |
| DCTPP1    | 9.99E-05    | 0.000234008 | 1.21515 | <b>1.21515</b> | cold up vs hot |
| MECR      | 0.000405254 | 0.000811337 | 1.21509 | <b>1.21509</b> | cold up vs hot |
| WBP11P1   | 0.00330232  | 0.00501353  | 1.21509 | <b>1.21509</b> | cold up vs hot |
| CLASP1    | 5.53E-05    | 0.000137264 | 1.21502 | <b>1.21502</b> | cold up vs hot |
| SNRPE     | 0.0016585   | 0.00277877  | 1.21496 | <b>1.21496</b> | cold up vs hot |
| PLCB3     | 0.00258851  | 0.00405367  | 1.21492 | <b>1.21492</b> | cold up vs hot |
| RPS16     | 0.00279921  | 0.00434471  | 1.21492 | <b>1.21492</b> | cold up vs hot |
| TAF2      | 0.00487407  | 0.00694421  | 1.21481 | <b>1.21481</b> | cold up vs hot |
| ATIC      | 0.000125712 | 0.000288454 | 1.21448 | <b>1.21448</b> | cold up vs hot |
| RPSA      | 0.00248145  | 0.00391009  | 1.21407 | <b>1.21407</b> | cold up vs hot |
| C14orf101 | 0.00401675  | 0.00590451  | 1.21379 | <b>1.21379</b> | cold up vs hot |
| NUP35     | 0.000917951 | 0.00166838  | 1.21336 | <b>1.21336</b> | cold up vs hot |
| KIAA1143  | 0.00253777  | 0.0039844   | 1.21335 | <b>1.21335</b> | cold up vs hot |
| CHAF1A    | 0.00487291  | 0.00694407  | 1.21325 | <b>1.21325</b> | cold up vs hot |
| DMWD      | 0.0012047   | 0.00211134  | 1.21298 | <b>1.21298</b> | cold up vs hot |
| EXOSC2    | 0.000355304 | 0.000720396 | 1.21296 | <b>1.21296</b> | cold up vs hot |
| TRUB2     | 0.000786024 | 0.00146032  | 1.21288 | <b>1.21288</b> | cold up vs hot |
| HDAC2     | 0.00170574  | 0.00284508  | 1.21287 | <b>1.21287</b> | cold up vs hot |
| ZBTB9     | 0.00222038  | 0.0035699   | 1.21286 | <b>1.21286</b> | cold up vs hot |
| NOP14     | 2.25E-05    | 6.02E-05    | 1.21282 | <b>1.21282</b> | cold up vs hot |
| EIF4A1    | 0.000206732 | 0.000444863 | 1.21263 | <b>1.21263</b> | cold up vs hot |
| DGKD      | 0.00531312  | 0.00743183  | 1.2122  | <b>1.2122</b>  | cold up vs hot |
| PIGN      | 0.00444443  | 0.00642465  | 1.21211 | <b>1.21211</b> | cold up vs hot |
| RMND5A    | 0.000998559 | 0.00179687  | 1.21202 | <b>1.21202</b> | cold up vs hot |
| ECSIT     | 0.00136578  | 0.00235136  | 1.21189 | <b>1.21189</b> | cold up vs hot |
| ANKRD57   | 0.00742999  | 0.00986634  | 1.21182 | <b>1.21182</b> | cold up vs hot |
| POLG2     | 0.00180176  | 0.00298161  | 1.21176 | <b>1.21176</b> | cold up vs hot |
| FARSB     | 9.53E-05    | 0.000224452 | 1.21154 | <b>1.21154</b> | cold up vs hot |
| PTPN11    | 0.00122371  | 0.00213892  | 1.21133 | <b>1.21133</b> | cold up vs hot |
| ANKRD17   | 0.000127173 | 0.00029103  | 1.21124 | <b>1.21124</b> | cold up vs hot |
| TADA1     | 0.00288081  | 0.00445758  | 1.21114 | <b>1.21114</b> | cold up vs hot |
| WDR46     | 0.00329356  | 0.00500489  | 1.21112 | <b>1.21112</b> | cold up vs hot |
| CCDC124   | 0.00568965  | 0.0078716   | 1.211   | <b>1.211</b>   | cold up vs hot |
| BCL9      | 0.00555619  | 0.00771562  | 1.21069 | <b>1.21069</b> | cold up vs hot |
| CNTR0B    | 0.000203047 | 0.000437367 | 1.21067 | <b>1.21067</b> | cold up vs hot |
| UBXN7     | 0.0073274   | 0.00975392  | 1.21032 | <b>1.21032</b> | cold up vs hot |
| TRMT61A   | 0.0051111   | 0.00721107  | 1.21025 | <b>1.21025</b> | cold up vs hot |
| RPUSD4    | 0.000315849 | 0.00064866  | 1.20998 | <b>1.20998</b> | cold up vs hot |

|          |             |             |         |                |                |
|----------|-------------|-------------|---------|----------------|----------------|
| NGAMT1   | 0.00527308  | 0.0073885   | 1.20974 | <b>1.20974</b> | cold up vs hot |
| FKTN     | 0.00425877  | 0.00620299  | 1.20952 | <b>1.20952</b> | cold up vs hot |
| IP09     | 0.000304361 | 0.000627237 | 1.20948 | <b>1.20948</b> | cold up vs hot |
| C3orf26  | 0.00148625  | 0.00252808  | 1.20945 | <b>1.20945</b> | cold up vs hot |
| ASAP2    | 0.00697531  | 0.00936354  | 1.20944 | <b>1.20944</b> | cold up vs hot |
| ANKRD11  | 7.68E-05    | 0.000184587 | 1.20941 | <b>1.20941</b> | cold up vs hot |
| DNMBP    | 0.00394523  | 0.00582298  | 1.20938 | <b>1.20938</b> | cold up vs hot |
| DNAJB1   | 0.000810213 | 0.00149929  | 1.20905 | <b>1.20905</b> | cold up vs hot |
| PFDN2    | 0.00301149  | 0.00463233  | 1.20895 | <b>1.20895</b> | cold up vs hot |
| TMEM184C | 0.000223379 | 0.000474892 | 1.20894 | <b>1.20894</b> | cold up vs hot |
| CCT8     | 3.40E-05    | 8.74E-05    | 1.20866 | <b>1.20866</b> | cold up vs hot |
| TXNRD2   | 0.00483015  | 0.00689518  | 1.20851 | <b>1.20851</b> | cold up vs hot |
| CYB5D1   | 0.00271755  | 0.00423306  | 1.20791 | <b>1.20791</b> | cold up vs hot |
| ZADH2    | 0.00168565  | 0.00281517  | 1.20782 | <b>1.20782</b> | cold up vs hot |
| YARS2    | 1.76E-05    | 4.78E-05    | 1.2078  | <b>1.2078</b>  | cold up vs hot |
| TIMM9    | 0.000164423 | 0.000364392 | 1.20775 | <b>1.20775</b> | cold up vs hot |
| FBXL19   | 0.00485802  | 0.00692739  | 1.20769 | <b>1.20769</b> | cold up vs hot |
| SCAP     | 0.000502131 | 0.000981798 | 1.20749 | <b>1.20749</b> | cold up vs hot |
| DHX40    | 0.00258791  | 0.00405367  | 1.20747 | <b>1.20747</b> | cold up vs hot |
| TP53BP2  | 0.000780438 | 0.00145119  | 1.20686 | <b>1.20686</b> | cold up vs hot |
| MTX2     | 0.000241631 | 0.00050971  | 1.20652 | <b>1.20652</b> | cold up vs hot |
| GIT1     | 0.00332132  | 0.00503535  | 1.20648 | <b>1.20648</b> | cold up vs hot |
| PIP5K1A  | 0.00024681  | 0.00051946  | 1.20626 | <b>1.20626</b> | cold up vs hot |
| FAM20B   | 0.00245702  | 0.00388201  | 1.20626 | <b>1.20626</b> | cold up vs hot |
| NHP2     | 0.00121693  | 0.00212902  | 1.20598 | <b>1.20598</b> | cold up vs hot |
| CKS1B    | 0.00338577  | 0.00511998  | 1.20571 | <b>1.20571</b> | cold up vs hot |
| MRP535   | 0.000556279 | 0.00107575  | 1.20564 | <b>1.20564</b> | cold up vs hot |
| ABCE1    | 0.00223061  | 0.00358054  | 1.20556 | <b>1.20556</b> | cold up vs hot |
| PABPC1   | 0.00707132  | 0.00947683  | 1.20543 | <b>1.20543</b> | cold up vs hot |
| ATXN7L3B | 0.000301662 | 0.000622461 | 1.20519 | <b>1.20519</b> | cold up vs hot |
| SIK2     | 0.00469645  | 0.00673378  | 1.20496 | <b>1.20496</b> | cold up vs hot |
| C16orf91 | 0.000482185 | 0.00094791  | 1.20488 | <b>1.20488</b> | cold up vs hot |
| MCAT     | 0.00509462  | 0.00719094  | 1.20474 | <b>1.20474</b> | cold up vs hot |
| FDX1L    | 0.00258872  | 0.00405367  | 1.20466 | <b>1.20466</b> | cold up vs hot |
| DPH5     | 0.000654278 | 0.00123883  | 1.20452 | <b>1.20452</b> | cold up vs hot |
| LETM1    | 0.00068137  | 0.00128306  | 1.20434 | <b>1.20434</b> | cold up vs hot |
| TTC19    | 0.00277713  | 0.00431616  | 1.20428 | <b>1.20428</b> | cold up vs hot |
| KIAA0831 | 0.00270853  | 0.00422103  | 1.20421 | <b>1.20421</b> | cold up vs hot |
| ZMYND8   | 0.00547898  | 0.0076295   | 1.20376 | <b>1.20376</b> | cold up vs hot |
| WRB      | 0.000675161 | 0.00127431  | 1.2034  | <b>1.2034</b>  | cold up vs hot |
| GPR89A   | 0.000295292 | 0.000611056 | 1.20327 | <b>1.20327</b> | cold up vs hot |
| POLR3H   | 0.00234652  | 0.00373354  | 1.20324 | <b>1.20324</b> | cold up vs hot |
| ZNF343   | 0.000614481 | 0.00117507  | 1.2029  | <b>1.2029</b>  | cold up vs hot |
| WRNIP1   | 8.28E-05    | 0.000197779 | 1.20265 | <b>1.20265</b> | cold up vs hot |
| ZNF785   | 0.00559672  | 0.00776199  | 1.20236 | <b>1.20236</b> | cold up vs hot |
| CS       | 0.000158434 | 0.000353203 | 1.2022  | <b>1.2022</b>  | cold up vs hot |
| BRD4     | 0.000146153 | 0.000329383 | 1.20217 | <b>1.20217</b> | cold up vs hot |
| PIP4K2B  | 6.18E-05    | 0.000151783 | 1.20199 | <b>1.20199</b> | cold up vs hot |
| OLA1     | 0.000398126 | 0.000798291 | 1.20198 | <b>1.20198</b> | cold up vs hot |
| PLEKHA9  | 0.00183125  | 0.00302428  | 1.20183 | <b>1.20183</b> | cold up vs hot |
| FRG1B    | 0.00329516  | 0.00500614  | 1.20171 | <b>1.20171</b> | cold up vs hot |
| KDM3A    | 0.000475247 | 0.000935412 | 1.20168 | <b>1.20168</b> | cold up vs hot |
| NAF1     | 2.82E-05    | 7.38E-05    | 1.20164 | <b>1.20164</b> | cold up vs hot |
| MUTED    | 0.00710144  | 0.00950939  | 1.20145 | <b>1.20145</b> | cold up vs hot |
| SEH1L    | 0.00206627  | 0.00335636  | 1.20127 | <b>1.20127</b> | cold up vs hot |
| NAE1     | 0.00121904  | 0.00213191  | 1.20113 | <b>1.20113</b> | cold up vs hot |
| TRIM13   | 0.00134023  | 0.00231591  | 1.20113 | <b>1.20113</b> | cold up vs hot |
| ATG9A    | 0.000161006 | 0.000358158 | 1.20107 | <b>1.20107</b> | cold up vs hot |
| HNRNPA1  | 0.00167782  | 0.00280425  | 1.20047 | <b>1.20047</b> | cold up vs hot |
| C20orf20 | 0.00166813  | 0.00279018  | 1.20018 | <b>1.20018</b> | cold up vs hot |
| NKIRAS2  | 0.00013775  | 0.000312495 | 1.20017 | <b>1.20017</b> | cold up vs hot |
| ACLY     | 0.000175324 | 0.000384566 | 1.19995 | <b>1.19995</b> | cold up vs hot |
| PKP4     | 0.00176271  | 0.00292366  | 1.19983 | <b>1.19983</b> | cold up vs hot |
| ZNF416   | 0.00198448  | 0.00324613  | 1.19981 | <b>1.19981</b> | cold up vs hot |
| TMEM120B | 0.000283306 | 0.000589121 | 1.19928 | <b>1.19928</b> | cold up vs hot |
| PEX5     | 9.09E-05    | 0.000215216 | 1.19924 | <b>1.19924</b> | cold up vs hot |
| MDH2     | 0.00240692  | 0.00381475  | 1.19915 | <b>1.19915</b> | cold up vs hot |
| SRRD     | 0.00448764  | 0.00647707  | 1.199   | <b>1.199</b>   | cold up vs hot |
| EIF3A    | 0.000791339 | 0.00146811  | 1.19895 | <b>1.19895</b> | cold up vs hot |
| TCTN3    | 0.000107871 | 0.000251442 | 1.19892 | <b>1.19892</b> | cold up vs hot |
| C19orf29 | 0.00100632  | 0.00180834  | 1.19891 | <b>1.19891</b> | cold up vs hot |
| BTBD7    | 0.00230133  | 0.00367777  | 1.19867 | <b>1.19867</b> | cold up vs hot |
| SFRS2B   | 0.00465586  | 0.0066844   | 1.19867 | <b>1.19867</b> | cold up vs hot |
| FANCC    | 0.00286842  | 0.00444157  | 1.19864 | <b>1.19864</b> | cold up vs hot |
| VKORC1L1 | 0.00197756  | 0.00323642  | 1.19833 | <b>1.19833</b> | cold up vs hot |
| ZFP64    | 0.000100093 | 0.000234457 | 1.198   | <b>1.198</b>   | cold up vs hot |
| C3orf31  | 0.000241875 | 0.000510061 | 1.19788 | <b>1.19788</b> | cold up vs hot |

|           |             |             |         |                |                |
|-----------|-------------|-------------|---------|----------------|----------------|
| SETD4     | 0.000561457 | 0.00108351  | 1.19778 | <b>1.19778</b> | cold up vs hot |
| SPNS1     | 0.00492721  | 0.00701227  | 1.19772 | <b>1.19772</b> | cold up vs hot |
| DLST      | 9.09E-05    | 0.000215281 | 1.19768 | <b>1.19768</b> | cold up vs hot |
| PTDSS1    | 0.000709876 | 0.00133193  | 1.19756 | <b>1.19756</b> | cold up vs hot |
| FAM200B   | 0.00633845  | 0.00862751  | 1.19743 | <b>1.19743</b> | cold up vs hot |
| UPF3A     | 0.00470982  | 0.00675005  | 1.19739 | <b>1.19739</b> | cold up vs hot |
| TUBGCP3   | 0.000654872 | 0.0012396   | 1.19719 | <b>1.19719</b> | cold up vs hot |
| MBTPS1    | 0.000339001 | 0.000691853 | 1.19707 | <b>1.19707</b> | cold up vs hot |
| PIGW      | 0.00153038  | 0.00259234  | 1.197   | <b>1.197</b>   | cold up vs hot |
| SMYD2     | 0.00241275  | 0.00382307  | 1.19697 | <b>1.19697</b> | cold up vs hot |
| METTL2B   | 0.00332988  | 0.00504481  | 1.19689 | <b>1.19689</b> | cold up vs hot |
| EDC3      | 0.000139174 | 0.000315177 | 1.19686 | <b>1.19686</b> | cold up vs hot |
| METTL2A   | 0.000220786 | 0.000469903 | 1.19683 | <b>1.19683</b> | cold up vs hot |
| PPRC1     | 0.00058841  | 0.00112852  | 1.19676 | <b>1.19676</b> | cold up vs hot |
| HMGXB4    | 0.0051466   | 0.00724707  | 1.1967  | <b>1.1967</b>  | cold up vs hot |
| ZNF587    | 0.00737288  | 0.00980048  | 1.19664 | <b>1.19664</b> | cold up vs hot |
| LASS2     | 0.000821457 | 0.00151709  | 1.19653 | <b>1.19653</b> | cold up vs hot |
| PRPF4     | 0.00037518  | 0.000756464 | 1.1961  | <b>1.1961</b>  | cold up vs hot |
| CIAPIN1   | 0.000330002 | 0.000675176 | 1.19591 | <b>1.19591</b> | cold up vs hot |
| RPL41     | 0.000680756 | 0.00128264  | 1.19583 | <b>1.19583</b> | cold up vs hot |
| BCL2L2    | 0.00440475  | 0.00637577  | 1.19521 | <b>1.19521</b> | cold up vs hot |
| FAM131A   | 0.00516119  | 0.00725978  | 1.19517 | <b>1.19517</b> | cold up vs hot |
| GRK4      | 0.00590105  | 0.00811509  | 1.19475 | <b>1.19475</b> | cold up vs hot |
| ATN1      | 0.00147737  | 0.00251429  | 1.19439 | <b>1.19439</b> | cold up vs hot |
| TGS1      | 0.00444406  | 0.00642465  | 1.19435 | <b>1.19435</b> | cold up vs hot |
| PCNXL3    | 0.00167307  | 0.00279702  | 1.19434 | <b>1.19434</b> | cold up vs hot |
| XRN2      | 0.00187422  | 0.00308278  | 1.19433 | <b>1.19433</b> | cold up vs hot |
| MAVS      | 0.000662288 | 0.00125255  | 1.19394 | <b>1.19394</b> | cold up vs hot |
| ZNF236    | 0.000481276 | 0.000946694 | 1.19371 | <b>1.19371</b> | cold up vs hot |
| NUPL1     | 0.00227111  | 0.00363481  | 1.19365 | <b>1.19365</b> | cold up vs hot |
| STT3A     | 0.0017466   | 0.00290284  | 1.19363 | <b>1.19363</b> | cold up vs hot |
| GAS8      | 0.00646443  | 0.00877521  | 1.19344 | <b>1.19344</b> | cold up vs hot |
| ZNF3      | 0.00210242  | 0.00340745  | 1.1934  | <b>1.1934</b>  | cold up vs hot |
| RCOR1     | 0.000824567 | 0.00152154  | 1.19321 | <b>1.19321</b> | cold up vs hot |
| C14orf135 | 0.00425008  | 0.00619171  | 1.19284 | <b>1.19284</b> | cold up vs hot |
| DHODH     | 0.00143749  | 0.00245603  | 1.19275 | <b>1.19275</b> | cold up vs hot |
| CTNND1    | 0.0019198   | 0.0031498   | 1.19265 | <b>1.19265</b> | cold up vs hot |
| C2orf44   | 0.000352976 | 0.000716566 | 1.19253 | <b>1.19253</b> | cold up vs hot |
| GGCT      | 0.00206283  | 0.00335244  | 1.1919  | <b>1.1919</b>  | cold up vs hot |
| NOP2      | 0.00245909  | 0.00388236  | 1.19188 | <b>1.19188</b> | cold up vs hot |
| C11orf84  | 0.00753223  | 0.00996965  | 1.19176 | <b>1.19176</b> | cold up vs hot |
| BPTF      | 0.00509037  | 0.00718649  | 1.1916  | <b>1.1916</b>  | cold up vs hot |
| MRT04     | 0.000928797 | 0.00168622  | 1.19149 | <b>1.19149</b> | cold up vs hot |
| LETMD1    | 0.00547628  | 0.00762737  | 1.1914  | <b>1.1914</b>  | cold up vs hot |
| ZFP91     | 0.00320845  | 0.00490065  | 1.19124 | <b>1.19124</b> | cold up vs hot |
| YRDC      | 0.00304438  | 0.00467741  | 1.19123 | <b>1.19123</b> | cold up vs hot |
| CCT4      | 0.000154773 | 0.000346062 | 1.19117 | <b>1.19117</b> | cold up vs hot |
| RPL14     | 0.00622651  | 0.008484    | 1.19109 | <b>1.19109</b> | cold up vs hot |
| KDM5A     | 0.00173243  | 0.00288224  | 1.191   | <b>1.191</b>   | cold up vs hot |
| ALG6      | 0.00431669  | 0.00626916  | 1.19095 | <b>1.19095</b> | cold up vs hot |
| C1orf124  | 0.00138697  | 0.00238092  | 1.19082 | <b>1.19082</b> | cold up vs hot |
| DHX37     | 0.00349158  | 0.00525684  | 1.19031 | <b>1.19031</b> | cold up vs hot |
| ZSWIM1    | 0.000356491 | 0.000721905 | 1.18988 | <b>1.18988</b> | cold up vs hot |
| UCKL1     | 0.0039775   | 0.00586     | 1.18968 | <b>1.18968</b> | cold up vs hot |
| POGZ      | 0.00324973  | 0.00494635  | 1.18947 | <b>1.18947</b> | cold up vs hot |
| HDGFRP2   | 0.00106354  | 0.00189915  | 1.18933 | <b>1.18933</b> | cold up vs hot |
| CARM1     | 0.000382799 | 0.000769929 | 1.18887 | <b>1.18887</b> | cold up vs hot |
| YEATS2    | 0.00110877  | 0.00196913  | 1.18882 | <b>1.18882</b> | cold up vs hot |
| C19orf2   | 0.00146447  | 0.00249494  | 1.18873 | <b>1.18873</b> | cold up vs hot |
| CNPY2     | 0.00185795  | 0.0030614   | 1.18864 | <b>1.18864</b> | cold up vs hot |
| CSRP2BP   | 0.000339658 | 0.000692761 | 1.18851 | <b>1.18851</b> | cold up vs hot |
| COG8      | 0.000366991 | 0.000741473 | 1.18826 | <b>1.18826</b> | cold up vs hot |
| RYK       | 0.00719484  | 0.00961144  | 1.18766 | <b>1.18766</b> | cold up vs hot |
| SUGT1     | 0.00152312  | 0.00258138  | 1.18761 | <b>1.18761</b> | cold up vs hot |
| SMAD4     | 0.00389425  | 0.00575946  | 1.18753 | <b>1.18753</b> | cold up vs hot |
| ZNF326    | 0.00157458  | 0.00265618  | 1.1871  | <b>1.1871</b>  | cold up vs hot |
| CSNK1G2   | 0.00639542  | 0.00869752  | 1.18688 | <b>1.18688</b> | cold up vs hot |
| RUVBL1    | 0.00309117  | 0.00474037  | 1.18686 | <b>1.18686</b> | cold up vs hot |
| TSC2      | 0.000753053 | 0.00140467  | 1.18679 | <b>1.18679</b> | cold up vs hot |
| PPP2R1A   | 0.000265358 | 0.000554742 | 1.18608 | <b>1.18608</b> | cold up vs hot |
| C16orf80  | 0.000243715 | 0.000513608 | 1.18606 | <b>1.18606</b> | cold up vs hot |
| UBA52     | 0.00216274  | 0.00349048  | 1.1856  | <b>1.1856</b>  | cold up vs hot |
| SERBP1    | 0.000321952 | 0.000659741 | 1.18535 | <b>1.18535</b> | cold up vs hot |
| AFMID     | 0.00522911  | 0.0073395   | 1.18515 | <b>1.18515</b> | cold up vs hot |
| MNAT1     | 0.0068925   | 0.00927335  | 1.18469 | <b>1.18469</b> | cold up vs hot |
| MAPK1     | 0.00125176  | 0.00218152  | 1.18439 | <b>1.18439</b> | cold up vs hot |
| BBS7      | 0.00739262  | 0.00982271  | 1.18427 | <b>1.18427</b> | cold up vs hot |

|          |             |             |         |                |                |
|----------|-------------|-------------|---------|----------------|----------------|
| RPL15    | 0.00243502  | 0.00385367  | 1.18424 | <b>1.18424</b> | cold up vs hot |
| C14orf21 | 0.00744244  | 0.00987913  | 1.18409 | <b>1.18409</b> | cold up vs hot |
| PDCD2L   | 0.00117131  | 0.00206169  | 1.18402 | <b>1.18402</b> | cold up vs hot |
| HECTD1   | 0.00378254  | 0.00562227  | 1.18393 | <b>1.18393</b> | cold up vs hot |
| PRR12    | 0.00377807  | 0.0056169   | 1.18381 | <b>1.18381</b> | cold up vs hot |
| UBAP2L   | 0.000788587 | 0.00146425  | 1.1835  | <b>1.1835</b>  | cold up vs hot |
| BANP     | 0.00125098  | 0.00218075  | 1.18349 | <b>1.18349</b> | cold up vs hot |
| MRPL42   | 0.00428692  | 0.00623286  | 1.18296 | <b>1.18296</b> | cold up vs hot |
| CCDC130  | 0.00320118  | 0.00489413  | 1.1829  | <b>1.1829</b>  | cold up vs hot |
| FASTKD1  | 0.00610622  | 0.00835673  | 1.18285 | <b>1.18285</b> | cold up vs hot |
| CDC37    | 7.82E-05    | 0.000187843 | 1.18282 | <b>1.18282</b> | cold up vs hot |
| OCRL     | 0.00255787  | 0.00401211  | 1.18282 | <b>1.18282</b> | cold up vs hot |
| C1orf43  | 0.00056023  | 0.00108211  | 1.18278 | <b>1.18278</b> | cold up vs hot |
| RNMTL1   | 0.00227466  | 0.00363871  | 1.1822  | <b>1.1822</b>  | cold up vs hot |
| NIP7     | 0.00380361  | 0.00564716  | 1.18161 | <b>1.18161</b> | cold up vs hot |
| MAZ      | 0.00169978  | 0.00283659  | 1.18149 | <b>1.18149</b> | cold up vs hot |
| CARKD    | 0.00200049  | 0.00326903  | 1.18149 | <b>1.18149</b> | cold up vs hot |
| PARP2    | 0.0022725   | 0.00363615  | 1.1808  | <b>1.1808</b>  | cold up vs hot |
| CYTH2    | 0.000951286 | 0.00172178  | 1.18077 | <b>1.18077</b> | cold up vs hot |
| DNM1L    | 0.00465424  | 0.00668353  | 1.18065 | <b>1.18065</b> | cold up vs hot |
| SLC35B4  | 0.00482368  | 0.00688746  | 1.18022 | <b>1.18022</b> | cold up vs hot |
| DDX1     | 0.00114967  | 0.00203017  | 1.1799  | <b>1.1799</b>  | cold up vs hot |
| SIN3B    | 0.000183669 | 0.000399607 | 1.17985 | <b>1.17985</b> | cold up vs hot |
| PIGF     | 0.00322157  | 0.00491439  | 1.17983 | <b>1.17983</b> | cold up vs hot |
| SCAMP4   | 0.00557842  | 0.00774154  | 1.17981 | <b>1.17981</b> | cold up vs hot |
| PA2G4    | 0.000482658 | 0.000948268 | 1.17923 | <b>1.17923</b> | cold up vs hot |
| GEMIN5   | 0.00222272  | 0.00357226  | 1.17906 | <b>1.17906</b> | cold up vs hot |
| PIGG     | 0.00149298  | 0.00253755  | 1.17881 | <b>1.17881</b> | cold up vs hot |
| NDUFS2   | 0.00208947  | 0.00338898  | 1.17845 | <b>1.17845</b> | cold up vs hot |
| TFDP1    | 0.00526447  | 0.00737961  | 1.17822 | <b>1.17822</b> | cold up vs hot |
| CHD1L    | 0.00473617  | 0.00677973  | 1.17816 | <b>1.17816</b> | cold up vs hot |
| KIAA0100 | 0.00120943  | 0.00211794  | 1.17772 | <b>1.17772</b> | cold up vs hot |
| UBE2MP1  | 0.0058539   | 0.00806043  | 1.17754 | <b>1.17754</b> | cold up vs hot |
| METTL8   | 0.00523466  | 0.00734571  | 1.17751 | <b>1.17751</b> | cold up vs hot |
| CPSF1    | 0.0055809   | 0.00774334  | 1.17712 | <b>1.17712</b> | cold up vs hot |
| GSK3B    | 0.000499525 | 0.000978461 | 1.17706 | <b>1.17706</b> | cold up vs hot |
| PGAM5    | 0.00342264  | 0.00516615  | 1.17682 | <b>1.17682</b> | cold up vs hot |
| NACA     | 0.00244112  | 0.00386145  | 1.17665 | <b>1.17665</b> | cold up vs hot |
| CLUAP1   | 0.00616465  | 0.00841728  | 1.17664 | <b>1.17664</b> | cold up vs hot |
| GTF2H4   | 0.00356695  | 0.00534933  | 1.17643 | <b>1.17643</b> | cold up vs hot |
| BTF3     | 0.00351713  | 0.00529099  | 1.17577 | <b>1.17577</b> | cold up vs hot |
| SMARCD1  | 0.000609055 | 0.0011664   | 1.17573 | <b>1.17573</b> | cold up vs hot |
| DDX52    | 0.0072192   | 0.00963348  | 1.1756  | <b>1.1756</b>  | cold up vs hot |
| WDYHV1   | 0.00411065  | 0.00602218  | 1.17551 | <b>1.17551</b> | cold up vs hot |
| DIP2A    | 0.00143191  | 0.00244777  | 1.1754  | <b>1.1754</b>  | cold up vs hot |
| HDLBP    | 0.00316983  | 0.00484846  | 1.17488 | <b>1.17488</b> | cold up vs hot |
| MRPL30   | 0.000236665 | 0.000500367 | 1.17477 | <b>1.17477</b> | cold up vs hot |
| VPS72    | 0.00207055  | 0.00336164  | 1.17471 | <b>1.17471</b> | cold up vs hot |
| PTPRA    | 0.000622814 | 0.00118891  | 1.17464 | <b>1.17464</b> | cold up vs hot |
| RBM18    | 0.00752499  | 0.00996411  | 1.17432 | <b>1.17432</b> | cold up vs hot |
| FBXO21   | 0.000941206 | 0.00170542  | 1.17402 | <b>1.17402</b> | cold up vs hot |
| DUSP12   | 0.00289032  | 0.00447125  | 1.17402 | <b>1.17402</b> | cold up vs hot |
| FIP1L1   | 0.000905984 | 0.00165031  | 1.17388 | <b>1.17388</b> | cold up vs hot |
| PPM1D    | 0.00609048  | 0.00834044  | 1.17357 | <b>1.17357</b> | cold up vs hot |
| ZNF574   | 0.00476708  | 0.00681558  | 1.17356 | <b>1.17356</b> | cold up vs hot |
| DGCR14   | 0.00471533  | 0.0067564   | 1.17353 | <b>1.17353</b> | cold up vs hot |
| GATAD2A  | 0.00173805  | 0.00289011  | 1.17338 | <b>1.17338</b> | cold up vs hot |
| RAE1     | 0.00117053  | 0.00206143  | 1.17329 | <b>1.17329</b> | cold up vs hot |
| ZNF282   | 0.005784    | 0.0079726   | 1.17274 | <b>1.17274</b> | cold up vs hot |
| ZNF304   | 0.0054599   | 0.00761106  | 1.17255 | <b>1.17255</b> | cold up vs hot |
| PRCC     | 0.00165123  | 0.00276794  | 1.17219 | <b>1.17219</b> | cold up vs hot |
| PCID2    | 0.00306101  | 0.00470074  | 1.17169 | <b>1.17169</b> | cold up vs hot |
| RBM28    | 0.00400231  | 0.00588985  | 1.17164 | <b>1.17164</b> | cold up vs hot |
| LRRC41   | 0.00164953  | 0.0027674   | 1.17143 | <b>1.17143</b> | cold up vs hot |
| TOP3A    | 0.00509612  | 0.00719149  | 1.17139 | <b>1.17139</b> | cold up vs hot |
| MED19    | 0.00135596  | 0.00233754  | 1.17124 | <b>1.17124</b> | cold up vs hot |
| STK35    | 0.00213419  | 0.00345208  | 1.17124 | <b>1.17124</b> | cold up vs hot |
| MCM3AP   | 0.000365539 | 0.000739079 | 1.17113 | <b>1.17113</b> | cold up vs hot |
| VDAC2    | 0.00305059  | 0.00468585  | 1.17078 | <b>1.17078</b> | cold up vs hot |
| TLL5     | 0.000935344 | 0.00169574  | 1.1705  | <b>1.1705</b>  | cold up vs hot |
| PKNOX1   | 0.000668574 | 0.00126297  | 1.17047 | <b>1.17047</b> | cold up vs hot |
| YIPF3    | 0.00247844  | 0.00390724  | 1.16995 | <b>1.16995</b> | cold up vs hot |
| DDX47    | 0.000131818 | 0.000300186 | 1.16948 | <b>1.16948</b> | cold up vs hot |
| HDGF     | 0.00748166  | 0.00992284  | 1.16938 | <b>1.16938</b> | cold up vs hot |
| YWHAE    | 0.000405018 | 0.000811113 | 1.16925 | <b>1.16925</b> | cold up vs hot |
| CCT5     | 0.00414782  | 0.00606575  | 1.1692  | <b>1.1692</b>  | cold up vs hot |
| SEC24B   | 0.00607047  | 0.00831653  | 1.16917 | <b>1.16917</b> | cold up vs hot |

|          |             |             |         |                |                |
|----------|-------------|-------------|---------|----------------|----------------|
| DKC1     | 0.000331257 | 0.000677319 | 1.16893 | <b>1.16893</b> | cold up vs hot |
| SETD5    | 0.00160742  | 0.0027032   | 1.16867 | <b>1.16867</b> | cold up vs hot |
| PPP5C    | 0.000449177 | 0.000891344 | 1.16859 | <b>1.16859</b> | cold up vs hot |
| EIF3G    | 0.00186999  | 0.00307813  | 1.16859 | <b>1.16859</b> | cold up vs hot |
| PNN      | 0.0048208   | 0.00688485  | 1.16779 | <b>1.16779</b> | cold up vs hot |
| RRN3     | 0.000820021 | 0.00151529  | 1.16778 | <b>1.16778</b> | cold up vs hot |
| EIF2S1   | 0.00207029  | 0.00336164  | 1.16749 | <b>1.16749</b> | cold up vs hot |
| PMS2     | 0.00293206  | 0.00452829  | 1.16729 | <b>1.16729</b> | cold up vs hot |
| ATXN2    | 0.000279201 | 0.00058126  | 1.167   | <b>1.167</b>   | cold up vs hot |
| NVL      | 0.00354622  | 0.00532313  | 1.1668  | <b>1.1668</b>  | cold up vs hot |
| TRMT61B  | 0.00568274  | 0.00786792  | 1.16645 | <b>1.16645</b> | cold up vs hot |
| GTPBP5   | 0.00297089  | 0.00457743  | 1.16634 | <b>1.16634</b> | cold up vs hot |
| CNIH     | 0.0049642   | 0.00704666  | 1.1662  | <b>1.1662</b>  | cold up vs hot |
| ZC3H14   | 0.000740187 | 0.00138344  | 1.16609 | <b>1.16609</b> | cold up vs hot |
| SNRNP200 | 0.00122311  | 0.00213845  | 1.16558 | <b>1.16558</b> | cold up vs hot |
| SLC25A17 | 0.00368304  | 0.00549816  | 1.1654  | <b>1.1654</b>  | cold up vs hot |
| DDX56    | 0.00468111  | 0.00671473  | 1.16469 | <b>1.16469</b> | cold up vs hot |
| SFRS14   | 0.00185333  | 0.00305534  | 1.16462 | <b>1.16462</b> | cold up vs hot |
| NUDCD3   | 0.00418348  | 0.00610696  | 1.16456 | <b>1.16456</b> | cold up vs hot |
| DHP5     | 0.00220739  | 0.003552    | 1.16439 | <b>1.16439</b> | cold up vs hot |
| PDPK1    | 0.000524669 | 0.00102189  | 1.16434 | <b>1.16434</b> | cold up vs hot |
| DVL3     | 0.00552469  | 0.00768332  | 1.16425 | <b>1.16425</b> | cold up vs hot |
| PRDM10   | 0.00544011  | 0.00758832  | 1.16403 | <b>1.16403</b> | cold up vs hot |
| DGCR2    | 0.0034875   | 0.00525311  | 1.16388 | <b>1.16388</b> | cold up vs hot |
| CRKL     | 0.00687336  | 0.00926008  | 1.16329 | <b>1.16329</b> | cold up vs hot |
| C2orf49  | 0.00597997  | 0.00821189  | 1.16289 | <b>1.16289</b> | cold up vs hot |
| DARS     | 0.00555401  | 0.00771422  | 1.16266 | <b>1.16266</b> | cold up vs hot |
| KRI1     | 0.00141543  | 0.00242214  | 1.16263 | <b>1.16263</b> | cold up vs hot |
| MLF2     | 0.00497581  | 0.00705894  | 1.16262 | <b>1.16262</b> | cold up vs hot |
| CIZ1     | 0.00615951  | 0.00841508  | 1.16257 | <b>1.16257</b> | cold up vs hot |
| SNRPD1   | 0.00542137  | 0.00756865  | 1.16225 | <b>1.16225</b> | cold up vs hot |
| NAT9     | 0.00529645  | 0.00741011  | 1.16212 | <b>1.16212</b> | cold up vs hot |
| GZF1     | 0.00109829  | 0.00195531  | 1.16176 | <b>1.16176</b> | cold up vs hot |
| SF3B3    | 0.00334437  | 0.0050644   | 1.1616  | <b>1.1616</b>  | cold up vs hot |
| TRIT1    | 0.0021434   | 0.0034644   | 1.16144 | <b>1.16144</b> | cold up vs hot |
| DNAJA3   | 0.000528397 | 0.00102884  | 1.1614  | <b>1.1614</b>  | cold up vs hot |
| UTP14A   | 0.00118375  | 0.00208077  | 1.16133 | <b>1.16133</b> | cold up vs hot |
| GNL2     | 0.00493159  | 0.00701545  | 1.16118 | <b>1.16118</b> | cold up vs hot |
| BAT1     | 0.00156089  | 0.0026358   | 1.16114 | <b>1.16114</b> | cold up vs hot |
| EEF2K    | 0.00201278  | 0.00328501  | 1.16078 | <b>1.16078</b> | cold up vs hot |
| DENR     | 0.00400558  | 0.00589206  | 1.16074 | <b>1.16074</b> | cold up vs hot |
| NOL11    | 0.00664807  | 0.00899642  | 1.16066 | <b>1.16066</b> | cold up vs hot |
| WDR5     | 0.00475029  | 0.00679307  | 1.16063 | <b>1.16063</b> | cold up vs hot |
| EPS15L1  | 0.000299309 | 0.000617997 | 1.16042 | <b>1.16042</b> | cold up vs hot |
| FUBP3    | 0.00593988  | 0.00816332  | 1.15995 | <b>1.15995</b> | cold up vs hot |
| CPSF6    | 2.54E-05    | 6.73E-05    | 1.15968 | <b>1.15968</b> | cold up vs hot |
| MOCS3    | 0.00687412  | 0.00926008  | 1.15944 | <b>1.15944</b> | cold up vs hot |
| GFOD2    | 0.000886868 | 0.00162001  | 1.15921 | <b>1.15921</b> | cold up vs hot |
| MRPL19   | 0.00040125  | 0.000804307 | 1.15917 | <b>1.15917</b> | cold up vs hot |
| USP31    | 0.00494844  | 0.00703481  | 1.15914 | <b>1.15914</b> | cold up vs hot |
| DGCR8    | 0.000225687 | 0.000479486 | 1.15888 | <b>1.15888</b> | cold up vs hot |
| UBN1     | 0.000567722 | 0.00109334  | 1.1588  | <b>1.1588</b>  | cold up vs hot |
| WBP11    | 0.00161614  | 0.00271645  | 1.15851 | <b>1.15851</b> | cold up vs hot |
| MNT      | 0.00239671  | 0.00380041  | 1.15824 | <b>1.15824</b> | cold up vs hot |
| IKBKAP   | 0.00223954  | 0.00359222  | 1.15787 | <b>1.15787</b> | cold up vs hot |
| DYNC112  | 0.000806994 | 0.0014946   | 1.15786 | <b>1.15786</b> | cold up vs hot |
| NARS     | 0.00569263  | 0.00787326  | 1.15758 | <b>1.15758</b> | cold up vs hot |
| ZNF133   | 0.00746673  | 0.00990506  | 1.15758 | <b>1.15758</b> | cold up vs hot |
| MED1     | 0.00390517  | 0.00577084  | 1.15757 | <b>1.15757</b> | cold up vs hot |
| RBMX     | 0.000838427 | 0.00154536  | 1.15743 | <b>1.15743</b> | cold up vs hot |
| MKRN2    | 0.000753054 | 0.00140467  | 1.15741 | <b>1.15741</b> | cold up vs hot |
| R3HDM2   | 0.00354772  | 0.00532417  | 1.15737 | <b>1.15737</b> | cold up vs hot |
| SURF6    | 0.00260533  | 0.00407773  | 1.1572  | <b>1.1572</b>  | cold up vs hot |
| ASNSD1   | 0.00749689  | 0.00993698  | 1.15705 | <b>1.15705</b> | cold up vs hot |
| C20orf72 | 0.00453034  | 0.00653003  | 1.15698 | <b>1.15698</b> | cold up vs hot |
| UTP11L   | 0.00734062  | 0.00976355  | 1.1564  | <b>1.1564</b>  | cold up vs hot |
| NFRKB    | 0.00403311  | 0.00592188  | 1.15588 | <b>1.15588</b> | cold up vs hot |
| KIAA0892 | 0.000256657 | 0.00053845  | 1.15581 | <b>1.15581</b> | cold up vs hot |
| WDR59    | 0.00252467  | 0.00397006  | 1.15567 | <b>1.15567</b> | cold up vs hot |
| MRPS27   | 0.00324008  | 0.0049328   | 1.15537 | <b>1.15537</b> | cold up vs hot |
| ZNF740   | 0.00253483  | 0.00398171  | 1.15525 | <b>1.15525</b> | cold up vs hot |
| FCF1     | 0.00464331  | 0.00667225  | 1.15514 | <b>1.15514</b> | cold up vs hot |
| C16orf68 | 0.00496006  | 0.00704366  | 1.15491 | <b>1.15491</b> | cold up vs hot |
| STRN4    | 0.00499824  | 0.00707786  | 1.15419 | <b>1.15419</b> | cold up vs hot |
| PTBP1    | 0.000461414 | 0.000912701 | 1.15407 | <b>1.15407</b> | cold up vs hot |
| TM9SF4   | 0.0013084   | 0.00226813  | 1.15321 | <b>1.15321</b> | cold up vs hot |
| DTD1     | 0.00723429  | 0.00964966  | 1.15301 | <b>1.15301</b> | cold up vs hot |

|          |             |             |          |                 |                  |
|----------|-------------|-------------|----------|-----------------|------------------|
| PNO1     | 0.00294057  | 0.00453499  | 1.15219  | <b>1.15219</b>  | cold up vs hot   |
| GTF3C2   | 0.00107987  | 0.00192409  | 1.15209  | <b>1.15209</b>  | cold up vs hot   |
| NSUN4    | 0.000860306 | 0.00157977  | 1.15187  | <b>1.15187</b>  | cold up vs hot   |
| UMPS     | 0.00120817  | 0.00211631  | 1.15181  | <b>1.15181</b>  | cold up vs hot   |
| UQCC     | 0.00208066  | 0.00337554  | 1.15002  | <b>1.15002</b>  | cold up vs hot   |
| TRIAP1   | 0.00619534  | 0.00844682  | 1.14925  | <b>1.14925</b>  | cold up vs hot   |
| ZNF384   | 0.00117716  | 0.00207031  | 1.14873  | <b>1.14873</b>  | cold up vs hot   |
| DDX19A   | 0.00243399  | 0.00385357  | 1.14851  | <b>1.14851</b>  | cold up vs hot   |
| ELAVL1   | 1.83E-06    | 5.87E-06    | 1.14806  | <b>1.14806</b>  | cold up vs hot   |
| C17orf39 | 0.00534098  | 0.0074676   | 1.14722  | <b>1.14722</b>  | cold up vs hot   |
| ZNF500   | 0.00431814  | 0.00626986  | 1.14627  | <b>1.14627</b>  | cold up vs hot   |
| C14orf93 | 0.0071776   | 0.00959499  | 1.14621  | <b>1.14621</b>  | cold up vs hot   |
| GRSF1    | 0.00395943  | 0.00583998  | 1.14606  | <b>1.14606</b>  | cold up vs hot   |
| COX10    | 0.00736463  | 0.0097915   | 1.14604  | <b>1.14604</b>  | cold up vs hot   |
| MINA     | 0.00456679  | 0.00657387  | 1.14547  | <b>1.14547</b>  | cold up vs hot   |
| LMAN2L   | 0.00641539  | 0.0087177   | 1.1454   | <b>1.1454</b>   | cold up vs hot   |
| DHX9     | 0.00021768  | 0.000465417 | 1.14538  | <b>1.14538</b>  | cold up vs hot   |
| LSM14B   | 0.00331357  | 0.00502592  | 1.14535  | <b>1.14535</b>  | cold up vs hot   |
| FXR2     | 0.00369736  | 0.00551494  | 1.14436  | <b>1.14436</b>  | cold up vs hot   |
| PWP1     | 0.00331189  | 0.00502455  | 1.14377  | <b>1.14377</b>  | cold up vs hot   |
| EIF4G1   | 0.0056023   | 0.00776808  | 1.14373  | <b>1.14373</b>  | cold up vs hot   |
| EP400    | 0.0020027   | 0.00327183  | 1.14354  | <b>1.14354</b>  | cold up vs hot   |
| CASC3    | 0.00665077  | 0.0089982   | 1.14337  | <b>1.14337</b>  | cold up vs hot   |
| YWHAQ    | 0.00287008  | 0.00444308  | 1.14275  | <b>1.14275</b>  | cold up vs hot   |
| COX4NB   | 0.0030206   | 0.00464416  | 1.14211  | <b>1.14211</b>  | cold up vs hot   |
| TRIM27   | 0.00725634  | 0.00967314  | 1.14206  | <b>1.14206</b>  | cold up vs hot   |
| PUM1     | 0.000822675 | 0.0015189   | 1.14172  | <b>1.14172</b>  | cold up vs hot   |
| SUDS3    | 0.00307911  | 0.00472298  | 1.14095  | <b>1.14095</b>  | cold up vs hot   |
| TAF4     | 0.00309656  | 0.00474753  | 1.13971  | <b>1.13971</b>  | cold up vs hot   |
| OXSM     | 0.00643889  | 0.008746    | 1.13939  | <b>1.13939</b>  | cold up vs hot   |
| NDUFA10  | 0.00157183  | 0.00265223  | 1.13845  | <b>1.13845</b>  | cold up vs hot   |
| NCOA5    | 0.00502415  | 0.00710838  | 1.1384   | <b>1.1384</b>   | cold up vs hot   |
| MANBAL   | 0.00439697  | 0.00636592  | 1.1383   | <b>1.1383</b>   | cold up vs hot   |
| CSNK2A2  | 0.00587046  | 0.00807813  | 1.13736  | <b>1.13736</b>  | cold up vs hot   |
| CCT7     | 0.00579031  | 0.00797961  | 1.13631  | <b>1.13631</b>  | cold up vs hot   |
| RAN      | 0.00601114  | 0.00824216  | 1.13544  | <b>1.13544</b>  | cold up vs hot   |
| CHD4     | 0.0024563   | 0.00388201  | 1.13535  | <b>1.13535</b>  | cold up vs hot   |
| RFT1     | 0.00715252  | 0.00956993  | 1.13498  | <b>1.13498</b>  | cold up vs hot   |
| CHCHD4   | 0.00554795  | 0.0077091   | 1.13451  | <b>1.13451</b>  | cold up vs hot   |
| ANKLE2   | 0.00222898  | 0.0035788   | 1.13368  | <b>1.13368</b>  | cold up vs hot   |
| DCP1B    | 0.00642632  | 0.00873073  | 1.1334   | <b>1.1334</b>   | cold up vs hot   |
| PRPF19   | 0.00599139  | 0.00821854  | 1.13316  | <b>1.13316</b>  | cold up vs hot   |
| RNPS1    | 0.00245849  | 0.00388235  | 1.13227  | <b>1.13227</b>  | cold up vs hot   |
| NSUN2    | 0.00733955  | 0.00976355  | 1.1322   | <b>1.1322</b>   | cold up vs hot   |
| C20orf4  | 0.00459324  | 0.00660612  | 1.13199  | <b>1.13199</b>  | cold up vs hot   |
| PRKRA    | 0.00407565  | 0.00597493  | 1.13193  | <b>1.13193</b>  | cold up vs hot   |
| AKAP8L   | 0.00483433  | 0.00689865  | 1.12997  | <b>1.12997</b>  | cold up vs hot   |
| RNF41    | 0.000725343 | 0.00135802  | 1.12994  | <b>1.12994</b>  | cold up vs hot   |
| MORF4L2  | 0.00346585  | 0.00522172  | 1.12904  | <b>1.12904</b>  | cold up vs hot   |
| MSL1     | 0.00750101  | 0.00994042  | 1.12639  | <b>1.12639</b>  | cold up vs hot   |
| SAFB     | 0.000914781 | 0.00166355  | 1.12536  | <b>1.12536</b>  | cold up vs hot   |
| C19orf50 | 0.00233083  | 0.00371322  | 1.12529  | <b>1.12529</b>  | cold up vs hot   |
| SNW1     | 0.00528571  | 0.00739984  | 1.12162  | <b>1.12162</b>  | cold up vs hot   |
| SFRS8    | 0.00505958  | 0.00714778  | 1.11919  | <b>1.11919</b>  | cold up vs hot   |
| GSPT1    | 0.0048912   | 0.00696557  | 1.1169   | <b>1.1169</b>   | cold up vs hot   |
| HNRNPUL1 | 0.00719781  | 0.00961279  | 1.11675  | <b>1.11675</b>  | cold up vs hot   |
| C19orf52 | 0.00219452  | 0.00353564  | 1.11404  | <b>1.11404</b>  | cold up vs hot   |
| SF1      | 0.00566909  | 0.0078532   | 1.11017  | <b>1.11017</b>  | cold up vs hot   |
| RBM12    | 0.00703538  | 0.00943254  | 1.10761  | <b>1.10761</b>  | cold up vs hot   |
| AKAP8    | 0.00378439  | 0.00562374  | 1.10747  | <b>1.10747</b>  | cold up vs hot   |
| HNRNPM   | 0.00322248  | 0.00503593  | 1.10489  | <b>1.10489</b>  | cold up vs hot   |
| TRA2B    | 0.00383409  | 0.00568594  | 1.10392  | <b>1.10392</b>  | cold up vs hot   |
| HNRNPU   | 0.00261646  | 0.00409122  | 1.09894  | <b>1.09894</b>  | cold up vs hot   |
| POP4     | 0.00473681  | 0.00677973  | 0.90817  | <b>-1.10112</b> | cold down vs hot |
| GPKOW    | 0.0022207   | 0.0035699   | 0.897091 | <b>-1.11471</b> | cold down vs hot |
| RNF34    | 0.0040555   | 0.0059494   | 0.892331 | <b>-1.12066</b> | cold down vs hot |
| ISY1     | 0.00612974  | 0.00838386  | 0.891973 | <b>-1.12111</b> | cold down vs hot |
| DERL1    | 0.00397583  | 0.00585887  | 0.890677 | <b>-1.12274</b> | cold down vs hot |
| HARS2    | 0.00569773  | 0.00787697  | 0.889593 | <b>-1.12411</b> | cold down vs hot |
| NFATC2IP | 0.00278828  | 0.00432981  | 0.888649 | <b>-1.1253</b>  | cold down vs hot |
| TMBIM6   | 0.00390022  | 0.00576698  | 0.887465 | <b>-1.1268</b>  | cold down vs hot |
| CHMP4B   | 0.000991791 | 0.00178667  | 0.887317 | <b>-1.12699</b> | cold down vs hot |
| TMUB2    | 0.0075222   | 0.00996411  | 0.885277 | <b>-1.12959</b> | cold down vs hot |
| VTI1A    | 0.0075303   | 0.00996912  | 0.884869 | <b>-1.13011</b> | cold down vs hot |
| ARFGAP2  | 0.00453295  | 0.00653235  | 0.884644 | <b>-1.1304</b>  | cold down vs hot |
| RHOA     | 0.00173856  | 0.00289021  | 0.88381  | <b>-1.13147</b> | cold down vs hot |
| PSMB2    | 0.00373651  | 0.00556272  | 0.878837 | <b>-1.13787</b> | cold down vs hot |

|          |             |             |          |                 |                  |
|----------|-------------|-------------|----------|-----------------|------------------|
| TADA2B   | 0.00399597  | 0.0058819   | 0.878682 | <b>-1.13807</b> | cold down vs hot |
| ARAF     | 0.00639654  | 0.00869752  | 0.878561 | <b>-1.13823</b> | cold down vs hot |
| CWF19L1  | 0.00400317  | 0.00588985  | 0.877609 | <b>-1.13946</b> | cold down vs hot |
| PIAS1    | 0.00306871  | 0.00471147  | 0.876334 | <b>-1.14112</b> | cold down vs hot |
| PTPMT1   | 0.00608844  | 0.0083394   | 0.87592  | <b>-1.14166</b> | cold down vs hot |
| RPN1     | 0.00636514  | 0.00866205  | 0.873575 | <b>-1.14472</b> | cold down vs hot |
| RBM17    | 0.0021263   | 0.00344102  | 0.873565 | <b>-1.14473</b> | cold down vs hot |
| MAP2K1   | 0.00513852  | 0.00724193  | 0.873179 | <b>-1.14524</b> | cold down vs hot |
| PPP2CA   | 0.00268628  | 0.00419236  | 0.8724   | <b>-1.14626</b> | cold down vs hot |
| C20orf24 | 0.0071786   | 0.00959499  | 0.871767 | <b>-1.1471</b>  | cold down vs hot |
| ARPC4    | 0.0017267   | 0.00287564  | 0.871347 | <b>-1.14765</b> | cold down vs hot |
| PSMC2    | 0.00542382  | 0.00757046  | 0.870679 | <b>-1.14853</b> | cold down vs hot |
| CEPT1    | 0.00732345  | 0.00975065  | 0.870283 | <b>-1.14905</b> | cold down vs hot |
| RBM22    | 0.000887336 | 0.00162041  | 0.870114 | <b>-1.14927</b> | cold down vs hot |
| PDZD11   | 0.00266711  | 0.00416543  | 0.870039 | <b>-1.14937</b> | cold down vs hot |
| RAB11A   | 0.00188509  | 0.00309752  | 0.869963 | <b>-1.14947</b> | cold down vs hot |
| TMCC1    | 0.0049407   | 0.00702534  | 0.869418 | <b>-1.1502</b>  | cold down vs hot |
| CDC42SE1 | 0.00729189  | 0.00971062  | 0.869109 | <b>-1.1506</b>  | cold down vs hot |
| GGA3     | 0.00728864  | 0.00970827  | 0.867545 | <b>-1.15268</b> | cold down vs hot |
| NDNL2    | 0.00512435  | 0.00722509  | 0.867472 | <b>-1.15277</b> | cold down vs hot |
| PPP6C    | 0.000647073 | 0.00122697  | 0.867201 | <b>-1.15313</b> | cold down vs hot |
| MGEA5    | 0.00650355  | 0.0088228   | 0.866471 | <b>-1.15411</b> | cold down vs hot |
| PGS1     | 0.00515816  | 0.00725865  | 0.866444 | <b>-1.15414</b> | cold down vs hot |
| ATPIF1   | 0.00428248  | 0.00622917  | 0.865008 | <b>-1.15606</b> | cold down vs hot |
| OAZ1     | 0.00525253  | 0.00736445  | 0.864955 | <b>-1.15613</b> | cold down vs hot |
| PSMG2    | 0.00134082  | 0.00231632  | 0.864555 | <b>-1.15666</b> | cold down vs hot |
| BLCAP    | 0.00177443  | 0.00293862  | 0.864472 | <b>-1.15678</b> | cold down vs hot |
| UXT      | 0.00234622  | 0.00373354  | 0.864454 | <b>-1.1568</b>  | cold down vs hot |
| CXorf26  | 0.00486083  | 0.00692838  | 0.864416 | <b>-1.15685</b> | cold down vs hot |
| IK       | 0.000637135 | 0.00121094  | 0.864163 | <b>-1.15719</b> | cold down vs hot |
| ADAR     | 0.0061995   | 0.00845072  | 0.863699 | <b>-1.15781</b> | cold down vs hot |
| PPP1R9B  | 0.00690395  | 0.00928301  | 0.863269 | <b>-1.15839</b> | cold down vs hot |
| ZFAND2B  | 0.00285665  | 0.0044244   | 0.863134 | <b>-1.15857</b> | cold down vs hot |
| DUSP28   | 0.007084    | 0.00949187  | 0.862539 | <b>-1.15937</b> | cold down vs hot |
| SYVN1    | 0.00507498  | 0.00716631  | 0.862039 | <b>-1.16004</b> | cold down vs hot |
| LSM10    | 0.00432892  | 0.00628413  | 0.861411 | <b>-1.16089</b> | cold down vs hot |
| ETV6     | 0.000629165 | 0.00119823  | 0.860825 | <b>-1.16168</b> | cold down vs hot |
| SLC9A6   | 0.00280204  | 0.00434808  | 0.860599 | <b>-1.16198</b> | cold down vs hot |
| ARF6     | 0.00373967  | 0.00556488  | 0.859819 | <b>-1.16304</b> | cold down vs hot |
| ACTR1A   | 0.0036787   | 0.00549294  | 0.859747 | <b>-1.16313</b> | cold down vs hot |
| CLIC1    | 0.00498077  | 0.00706231  | 0.859497 | <b>-1.16347</b> | cold down vs hot |
| ARHGEF18 | 0.00276506  | 0.00430092  | 0.85892  | <b>-1.16425</b> | cold down vs hot |
| RPA2     | 0.00127929  | 0.00222475  | 0.858888 | <b>-1.1643</b>  | cold down vs hot |
| NCOA4    | 0.00639589  | 0.00869752  | 0.858784 | <b>-1.16444</b> | cold down vs hot |
| UBAP1    | 0.00218734  | 0.00352756  | 0.858525 | <b>-1.16479</b> | cold down vs hot |
| FAM120AO | 0.00238628  | 0.00378665  | 0.857828 | <b>-1.16573</b> | cold down vs hot |
| FAM50A   | 0.00688881  | 0.00927031  | 0.857327 | <b>-1.16642</b> | cold down vs hot |
| FAM82A2  | 0.00199485  | 0.00326064  | 0.856829 | <b>-1.16709</b> | cold down vs hot |
| SIAH2    | 0.0023869   | 0.0037867   | 0.856339 | <b>-1.16776</b> | cold down vs hot |
| RNF135   | 0.00237768  | 0.00377574  | 0.856276 | <b>-1.16785</b> | cold down vs hot |
| FLOT2    | 0.00690971  | 0.00928885  | 0.855168 | <b>-1.16936</b> | cold down vs hot |
| TAF12    | 0.00554298  | 0.00770547  | 0.854026 | <b>-1.17092</b> | cold down vs hot |
| ACTR2    | 0.00233091  | 0.00371322  | 0.853549 | <b>-1.17158</b> | cold down vs hot |
| C2orf24  | 0.00680178  | 0.00917968  | 0.853475 | <b>-1.17168</b> | cold down vs hot |
| VRK3     | 0.000455902 | 0.000902494 | 0.853185 | <b>-1.17208</b> | cold down vs hot |
| C17orf95 | 0.00519962  | 0.00730439  | 0.852485 | <b>-1.17304</b> | cold down vs hot |
| ZMAT2    | 0.000344764 | 0.000702079 | 0.8522   | <b>-1.17343</b> | cold down vs hot |
| SDHD     | 0.00700579  | 0.00939865  | 0.852108 | <b>-1.17356</b> | cold down vs hot |
| CXorf40A | 0.000665099 | 0.00125677  | 0.851547 | <b>-1.17433</b> | cold down vs hot |
| ZC3HAV1  | 0.00361398  | 0.00541116  | 0.850885 | <b>-1.17525</b> | cold down vs hot |
| RUFY1    | 0.000272985 | 0.000569409 | 0.85076  | <b>-1.17542</b> | cold down vs hot |
| SMAP1    | 0.00538748  | 0.0075294   | 0.850627 | <b>-1.1756</b>  | cold down vs hot |
| C9orf25  | 0.00446585  | 0.00644937  | 0.850523 | <b>-1.17575</b> | cold down vs hot |
| PI4K2A   | 0.00721074  | 0.00962612  | 0.850519 | <b>-1.17575</b> | cold down vs hot |
| PAIP2    | 0.00299     | 0.00460254  | 0.849805 | <b>-1.17674</b> | cold down vs hot |
| GABARAP  | 0.00373475  | 0.00556263  | 0.849721 | <b>-1.17686</b> | cold down vs hot |
| ATXN7    | 0.00514081  | 0.00724359  | 0.849523 | <b>-1.17713</b> | cold down vs hot |
| CAP1     | 0.00158346  | 0.0026691   | 0.84951  | <b>-1.17715</b> | cold down vs hot |
| PCBD2    | 0.00390944  | 0.00577538  | 0.849433 | <b>-1.17726</b> | cold down vs hot |
| YIPF1    | 0.000227638 | 0.000482846 | 0.849401 | <b>-1.1773</b>  | cold down vs hot |
| RAB35    | 0.000101355 | 0.000237271 | 0.849372 | <b>-1.17734</b> | cold down vs hot |
| CHMP7    | 0.00135073  | 0.00233037  | 0.849243 | <b>-1.17752</b> | cold down vs hot |
| COMMD3   | 0.00201857  | 0.00329233  | 0.849025 | <b>-1.17782</b> | cold down vs hot |
| YWHAH    | 0.00223669  | 0.00358853  | 0.84902  | <b>-1.17783</b> | cold down vs hot |
| NADK     | 0.00153116  | 0.00259279  | 0.84843  | <b>-1.17865</b> | cold down vs hot |
| RNF114   | 0.000637871 | 0.00121199  | 0.848318 | <b>-1.1788</b>  | cold down vs hot |
| KDM2A    | 0.000431001 | 0.000859193 | 0.848113 | <b>-1.17909</b> | cold down vs hot |

|          |             |             |          |                 |                  |
|----------|-------------|-------------|----------|-----------------|------------------|
| CC2D1B   | 0.00293586  | 0.00453253  | 0.847954 | <b>-1.17931</b> | cold down vs hot |
| AP4B1    | 0.00292521  | 0.00451879  | 0.847525 | <b>-1.17991</b> | cold down vs hot |
| IKBKB    | 0.000688522 | 0.00129466  | 0.847297 | <b>-1.18022</b> | cold down vs hot |
| IKZF4    | 0.00693818  | 0.0093252   | 0.847184 | <b>-1.18038</b> | cold down vs hot |
| EDEM2    | 0.00417952  | 0.0061039   | 0.846482 | <b>-1.18136</b> | cold down vs hot |
| HMGCL    | 0.0048096   | 0.00687036  | 0.846315 | <b>-1.18159</b> | cold down vs hot |
| WDR7     | 0.0020197   | 0.003293    | 0.845756 | <b>-1.18237</b> | cold down vs hot |
| VPS29    | 0.000689653 | 0.00129641  | 0.844625 | <b>-1.18396</b> | cold down vs hot |
| OTUD5    | 3.54E-05    | 9.08E-05    | 0.844601 | <b>-1.18399</b> | cold down vs hot |
| UBE2D2   | 1.64E-05    | 4.49E-05    | 0.844284 | <b>-1.18444</b> | cold down vs hot |
| PSMB1    | 0.00117023  | 0.00206143  | 0.844163 | <b>-1.18461</b> | cold down vs hot |
| SERF2    | 0.00739668  | 0.0098261   | 0.842992 | <b>-1.18625</b> | cold down vs hot |
| EPS15    | 0.00418135  | 0.0061052   | 0.841826 | <b>-1.18789</b> | cold down vs hot |
| JMJD5    | 0.00270653  | 0.00421892  | 0.841699 | <b>-1.18807</b> | cold down vs hot |
| USP20    | 0.00274112  | 0.00426771  | 0.841509 | <b>-1.18834</b> | cold down vs hot |
| MAPKAPK2 | 0.00145877  | 0.00248798  | 0.841336 | <b>-1.18859</b> | cold down vs hot |
| FYN      | 0.00511973  | 0.00722169  | 0.841046 | <b>-1.189</b>   | cold down vs hot |
| NAGA     | 0.00412398  | 0.0060363   | 0.840726 | <b>-1.18945</b> | cold down vs hot |
| EZH1     | 0.00598397  | 0.00821189  | 0.840587 | <b>-1.18964</b> | cold down vs hot |
| BCL7B    | 0.000648776 | 0.00122948  | 0.84051  | <b>-1.18975</b> | cold down vs hot |
| ARAP1    | 0.00445166  | 0.00643226  | 0.840505 | <b>-1.18976</b> | cold down vs hot |
| PLEKHM1  | 0.00495117  | 0.00703716  | 0.840394 | <b>-1.18992</b> | cold down vs hot |
| ACOT13   | 0.00247185  | 0.00389968  | 0.840156 | <b>-1.19025</b> | cold down vs hot |
| FBXO18   | 0.000118324 | 0.000273657 | 0.840151 | <b>-1.19026</b> | cold down vs hot |
| C10orf76 | 3.32E-05    | 8.56E-05    | 0.840039 | <b>-1.19042</b> | cold down vs hot |
| FAM21B   | 0.00478267  | 0.00683489  | 0.83982  | <b>-1.19073</b> | cold down vs hot |
| CDC42    | 5.32E-05    | 0.000132541 | 0.839503 | <b>-1.19118</b> | cold down vs hot |
| ORMDL2   | 0.00275617  | 0.0042881   | 0.839339 | <b>-1.19141</b> | cold down vs hot |
| CUTC     | 0.00361772  | 0.00541303  | 0.839071 | <b>-1.19179</b> | cold down vs hot |
| CRTC3    | 0.00499154  | 0.00707338  | 0.83899  | <b>-1.19191</b> | cold down vs hot |
| MTMR1    | 0.00415826  | 0.00607693  | 0.838969 | <b>-1.19194</b> | cold down vs hot |
| DNPEP    | 0.000194353 | 0.000420582 | 0.838327 | <b>-1.19285</b> | cold down vs hot |
| STIM1    | 0.00258325  | 0.00404803  | 0.837816 | <b>-1.19358</b> | cold down vs hot |
| COQ2     | 0.00140703  | 0.00241092  | 0.837697 | <b>-1.19375</b> | cold down vs hot |
| SFRS5    | 0.000730215 | 0.00136636  | 0.837533 | <b>-1.19398</b> | cold down vs hot |
| TFE3     | 0.00024257  | 0.000511361 | 0.837095 | <b>-1.19461</b> | cold down vs hot |
| VCP      | 0.000152957 | 0.000342352 | 0.837068 | <b>-1.19465</b> | cold down vs hot |
| PLEKHM1P | 0.00585974  | 0.00806677  | 0.836455 | <b>-1.19552</b> | cold down vs hot |
| POLR3GL  | 0.000320654 | 0.000657286 | 0.83586  | <b>-1.19637</b> | cold down vs hot |
| ERICH1   | 0.00617653  | 0.00842645  | 0.835842 | <b>-1.1964</b>  | cold down vs hot |
| TMEM50B  | 0.0071167   | 0.00952786  | 0.835563 | <b>-1.1968</b>  | cold down vs hot |
| C18orf8  | 0.000108248 | 0.000252051 | 0.83536  | <b>-1.19709</b> | cold down vs hot |
| MSL3     | 0.00430591  | 0.00625489  | 0.834975 | <b>-1.19764</b> | cold down vs hot |
| CAMK2G   | 0.00298755  | 0.00459985  | 0.834719 | <b>-1.19801</b> | cold down vs hot |
| RAP1B    | 0.00474696  | 0.00679128  | 0.834698 | <b>-1.19804</b> | cold down vs hot |
| AAK1     | 0.000447283 | 0.000888125 | 0.834022 | <b>-1.19901</b> | cold down vs hot |
| STX8     | 0.00222764  | 0.00357753  | 0.833951 | <b>-1.19911</b> | cold down vs hot |
| ARHGAP17 | 2.61E-05    | 6.89E-05    | 0.833637 | <b>-1.19956</b> | cold down vs hot |
| PSMA6    | 0.000157833 | 0.000352058 | 0.833422 | <b>-1.19987</b> | cold down vs hot |
| ORAI3    | 0.00546221  | 0.00761265  | 0.833295 | <b>-1.20006</b> | cold down vs hot |
| CHFR     | 0.00293997  | 0.00453499  | 0.832786 | <b>-1.20079</b> | cold down vs hot |
| NFKBIB   | 0.0011051   | 0.00196476  | 0.832764 | <b>-1.20082</b> | cold down vs hot |
| COMMD9   | 0.000299915 | 0.000619053 | 0.832677 | <b>-1.20095</b> | cold down vs hot |
| CCDC115  | 0.000257291 | 0.000539605 | 0.832518 | <b>-1.20118</b> | cold down vs hot |
| MYL6     | 0.000591905 | 0.00113489  | 0.832424 | <b>-1.20131</b> | cold down vs hot |
| PDIA3    | 0.00485973  | 0.00692831  | 0.832376 | <b>-1.20138</b> | cold down vs hot |
| INPP4A   | 0.00016754  | 0.000369362 | 0.832151 | <b>-1.20171</b> | cold down vs hot |
| PPP1CA   | 0.00104706  | 0.00187228  | 0.832052 | <b>-1.20185</b> | cold down vs hot |
| ATP6AP2  | 0.000306008 | 0.000629838 | 0.831544 | <b>-1.20258</b> | cold down vs hot |
| NDUFB4   | 0.00128208  | 0.00222783  | 0.831505 | <b>-1.20264</b> | cold down vs hot |
| REEP5    | 0.000610853 | 0.00116916  | 0.830882 | <b>-1.20354</b> | cold down vs hot |
| RNF44    | 0.00327417  | 0.00498005  | 0.830306 | <b>-1.20438</b> | cold down vs hot |
| C9orf21  | 0.00192587  | 0.00315817  | 0.83014  | <b>-1.20462</b> | cold down vs hot |
| ABI1     | 0.00421017  | 0.00614042  | 0.829875 | <b>-1.205</b>   | cold down vs hot |
| ZCCHC2   | 0.00220978  | 0.00355497  | 0.829615 | <b>-1.20538</b> | cold down vs hot |
| RBCK1    | 0.00126471  | 0.00220057  | 0.829375 | <b>-1.20573</b> | cold down vs hot |
| SNAPC5   | 0.000119422 | 0.000275799 | 0.828727 | <b>-1.20667</b> | cold down vs hot |
| HINT2    | 0.00547604  | 0.00762737  | 0.828242 | <b>-1.20738</b> | cold down vs hot |
| C19orf12 | 0.00120198  | 0.00210715  | 0.828101 | <b>-1.20758</b> | cold down vs hot |
| LEPROTL1 | 0.000735368 | 0.00137561  | 0.827113 | <b>-1.20902</b> | cold down vs hot |
| SPCS3    | 0.00336418  | 0.00509086  | 0.826885 | <b>-1.20936</b> | cold down vs hot |
| UPRT     | 0.000105012 | 0.000245391 | 0.82663  | <b>-1.20973</b> | cold down vs hot |
| ARPC5L   | 0.00103836  | 0.00185928  | 0.826545 | <b>-1.20986</b> | cold down vs hot |
| AFTPH    | 0.00118091  | 0.00207634  | 0.826118 | <b>-1.21048</b> | cold down vs hot |
| TUSC2    | 0.000289552 | 0.000600321 | 0.825942 | <b>-1.21074</b> | cold down vs hot |
| TBC1D22A | 0.00088906  | 0.00162276  | 0.825761 | <b>-1.211</b>   | cold down vs hot |
| SURF1    | 0.00140504  | 0.00240877  | 0.825544 | <b>-1.21132</b> | cold down vs hot |

|           |             |             |          |                 |                  |
|-----------|-------------|-------------|----------|-----------------|------------------|
| HAGH      | 0.00499517  | 0.00707519  | 0.825139 | <b>-1.21192</b> | cold down vs hot |
| CCDC22    | 9.49E-05    | 0.000223662 | 0.82482  | <b>-1.21239</b> | cold down vs hot |
| CLTB      | 0.00323035  | 0.00492324  | 0.82482  | <b>-1.21239</b> | cold down vs hot |
| CHMP4A    | 6.61E-05    | 0.0001614   | 0.824251 | <b>-1.21322</b> | cold down vs hot |
| COMMD1    | 0.000167078 | 0.000368899 | 0.823862 | <b>-1.2138</b>  | cold down vs hot |
| SLC35D2   | 0.00652714  | 0.00885113  | 0.823678 | <b>-1.21407</b> | cold down vs hot |
| FAM105B   | 0.00117096  | 0.00206163  | 0.823668 | <b>-1.21408</b> | cold down vs hot |
| FAM58A    | 0.00230678  | 0.00368467  | 0.823639 | <b>-1.21412</b> | cold down vs hot |
| HSD17B4   | 3.10E-05    | 8.05E-05    | 0.822918 | <b>-1.21519</b> | cold down vs hot |
| CKLF      | 0.000211409 | 0.000454031 | 0.822541 | <b>-1.21575</b> | cold down vs hot |
| TMEM219   | 0.000135614 | 0.0003084   | 0.822412 | <b>-1.21593</b> | cold down vs hot |
| PDE6D     | 0.00159025  | 0.000354233 | 0.821863 | <b>-1.21675</b> | cold down vs hot |
| SHISA5    | 0.000255532 | 0.000536433 | 0.821575 | <b>-1.21717</b> | cold down vs hot |
| PHF1      | 0.000865801 | 0.00158775  | 0.821337 | <b>-1.21753</b> | cold down vs hot |
| CASP6     | 0.0013843   | 0.00237738  | 0.820782 | <b>-1.21835</b> | cold down vs hot |
| TMEM66    | 0.0015283   | 0.00258948  | 0.820548 | <b>-1.2187</b>  | cold down vs hot |
| UVRAG     | 0.000919176 | 0.00167014  | 0.820494 | <b>-1.21878</b> | cold down vs hot |
| MKRN1     | 0.000720139 | 0.00134906  | 0.819449 | <b>-1.22033</b> | cold down vs hot |
| RIPK2     | 0.0012392   | 0.00216138  | 0.81926  | <b>-1.22061</b> | cold down vs hot |
| IQSEC1    | 0.00158877  | 0.00267459  | 0.819174 | <b>-1.22074</b> | cold down vs hot |
| WWP1      | 0.00374541  | 0.00557216  | 0.819138 | <b>-1.2208</b>  | cold down vs hot |
| G6PD      | 0.0049212   | 0.00700525  | 0.819038 | <b>-1.22094</b> | cold down vs hot |
| MSL2      | 5.87E-05    | 0.000144946 | 0.818743 | <b>-1.22138</b> | cold down vs hot |
| ABHD15    | 0.0057804   | 0.00796931  | 0.818419 | <b>-1.22187</b> | cold down vs hot |
| MAX       | 4.25E-06    | 1.29E-05    | 0.818342 | <b>-1.22198</b> | cold down vs hot |
| CREBL2    | 0.000542859 | 0.0010526   | 0.818213 | <b>-1.22218</b> | cold down vs hot |
| ZNF710    | 0.00294033  | 0.00453499  | 0.817936 | <b>-1.22259</b> | cold down vs hot |
| NT5DC1    | 0.00613328  | 0.00838673  | 0.817774 | <b>-1.22283</b> | cold down vs hot |
| MED7      | 0.00107897  | 0.00192301  | 0.817708 | <b>-1.22293</b> | cold down vs hot |
| KDM4C     | 0.00220575  | 0.00355024  | 0.817567 | <b>-1.22314</b> | cold down vs hot |
| SERP1     | 0.000295765 | 0.000611842 | 0.817541 | <b>-1.22318</b> | cold down vs hot |
| ZBTB4     | 0.00135307  | 0.00233317  | 0.817466 | <b>-1.22329</b> | cold down vs hot |
| SRA1      | 0.000208453 | 0.000448271 | 0.81716  | <b>-1.22375</b> | cold down vs hot |
| C12orf65  | 4.72E-05    | 0.00011891  | 0.817015 | <b>-1.22397</b> | cold down vs hot |
| C2CD2L    | 0.00411664  | 0.0060269   | 0.816899 | <b>-1.22414</b> | cold down vs hot |
| HS6ST1    | 0.00150969  | 0.00256128  | 0.81689  | <b>-1.22416</b> | cold down vs hot |
| LSM6      | 5.75E-05    | 0.000142308 | 0.816586 | <b>-1.22461</b> | cold down vs hot |
| WDR44     | 0.00187396  | 0.00308278  | 0.816261 | <b>-1.2251</b>  | cold down vs hot |
| SEC61B    | 0.000235686 | 0.000498459 | 0.815836 | <b>-1.22574</b> | cold down vs hot |
| NDUFA1    | 0.00103251  | 0.00185032  | 0.815812 | <b>-1.22577</b> | cold down vs hot |
| PNRC2     | 0.00175609  | 0.00291342  | 0.815617 | <b>-1.22607</b> | cold down vs hot |
| ARPC2     | 6.37E-07    | 2.17E-06    | 0.815291 | <b>-1.22656</b> | cold down vs hot |
| NSMCE4A   | 0.000877659 | 0.00160588  | 0.81524  | <b>-1.22663</b> | cold down vs hot |
| IRAK4     | 0.00520535  | 0.00730929  | 0.815147 | <b>-1.22677</b> | cold down vs hot |
| MMAA      | 0.00153922  | 0.00260393  | 0.814928 | <b>-1.2271</b>  | cold down vs hot |
| CDV3      | 8.87E-07    | 2.97E-06    | 0.814894 | <b>-1.22715</b> | cold down vs hot |
| RNF38     | 0.00113785  | 0.00201365  | 0.814877 | <b>-1.22718</b> | cold down vs hot |
| WIBG      | 4.64E-06    | 1.39E-05    | 0.814512 | <b>-1.22773</b> | cold down vs hot |
| TEP1      | 0.000640681 | 0.00121662  | 0.81426  | <b>-1.22811</b> | cold down vs hot |
| BAT5      | 0.000318485 | 0.000653456 | 0.813174 | <b>-1.22975</b> | cold down vs hot |
| TSR2      | 9.67E-06    | 2.76E-05    | 0.813124 | <b>-1.22982</b> | cold down vs hot |
| TNK2      | 0.00256133  | 0.00401657  | 0.812825 | <b>-1.23028</b> | cold down vs hot |
| MPND      | 0.00300055  | 0.00461768  | 0.812066 | <b>-1.23143</b> | cold down vs hot |
| PPP1R2    | 0.00034921  | 0.000709582 | 0.811813 | <b>-1.23181</b> | cold down vs hot |
| EXOSC1    | 0.000330482 | 0.000675946 | 0.811662 | <b>-1.23204</b> | cold down vs hot |
| TMEM9B    | 2.22E-05    | 5.93E-05    | 0.811534 | <b>-1.23223</b> | cold down vs hot |
| ACAA1     | 0.000125778 | 0.000288454 | 0.811515 | <b>-1.23226</b> | cold down vs hot |
| DTNBP1    | 0.00073566  | 0.00137576  | 0.811145 | <b>-1.23282</b> | cold down vs hot |
| ATG3      | 2.18E-05    | 5.85E-05    | 0.811034 | <b>-1.23299</b> | cold down vs hot |
| SNAP23    | 0.000686127 | 0.0012909   | 0.810959 | <b>-1.23311</b> | cold down vs hot |
| CCDC12    | 1.34E-05    | 3.72E-05    | 0.810935 | <b>-1.23314</b> | cold down vs hot |
| SMAD3     | 0.00575538  | 0.00794321  | 0.81092  | <b>-1.23317</b> | cold down vs hot |
| DYNLT1    | 0.000169828 | 0.000373957 | 0.810717 | <b>-1.23348</b> | cold down vs hot |
| LOC146880 | 0.000567106 | 0.0010928   | 0.810587 | <b>-1.23367</b> | cold down vs hot |
| RAP2B     | 0.00149418  | 0.00253893  | 0.810263 | <b>-1.23417</b> | cold down vs hot |
| LTA4H     | 0.000138525 | 0.000313818 | 0.810199 | <b>-1.23426</b> | cold down vs hot |
| STX12     | 1.88E-05    | 5.10E-05    | 0.810145 | <b>-1.23435</b> | cold down vs hot |
| B3GNT2    | 0.00589599  | 0.00810984  | 0.809674 | <b>-1.23507</b> | cold down vs hot |
| HSPB11    | 0.000277934 | 0.000579177 | 0.809243 | <b>-1.23572</b> | cold down vs hot |
| RNF19A    | 0.00454145  | 0.00654316  | 0.808993 | <b>-1.23611</b> | cold down vs hot |
| HMG2      | 8.43E-05    | 0.000200718 | 0.808821 | <b>-1.23637</b> | cold down vs hot |
| TRAPP2    | 0.00118929  | 0.00208659  | 0.808737 | <b>-1.2365</b>  | cold down vs hot |
| FAM21C    | 0.000174331 | 0.000382839 | 0.808655 | <b>-1.23662</b> | cold down vs hot |
| CDKN2D    | 0.00478136  | 0.00683451  | 0.808468 | <b>-1.23691</b> | cold down vs hot |
| H2AFY     | 8.20E-06    | 2.37E-05    | 0.808267 | <b>-1.23721</b> | cold down vs hot |
| CHST12    | 0.000858396 | 0.00157772  | 0.808151 | <b>-1.23739</b> | cold down vs hot |
| FBXO48    | 0.00576634  | 0.00795162  | 0.807734 | <b>-1.23803</b> | cold down vs hot |

|           |             |             |          |                 |                  |
|-----------|-------------|-------------|----------|-----------------|------------------|
| NAPA      | 0.000212021 | 0.000455194 | 0.807188 | <b>-1.23887</b> | cold down vs hot |
| CCNYL1    | 0.00062879  | 0.00119787  | 0.807021 | <b>-1.23912</b> | cold down vs hot |
| ALAS1     | 0.000350544 | 0.000711849 | 0.806874 | <b>-1.23935</b> | cold down vs hot |
| MYL12B    | 4.84E-05    | 0.000121597 | 0.806717 | <b>-1.23959</b> | cold down vs hot |
| PHKG2     | 1.75E-05    | 4.78E-05    | 0.806557 | <b>-1.23984</b> | cold down vs hot |
| LOC644936 | 0.000259405 | 0.000543604 | 0.806448 | <b>-1.24001</b> | cold down vs hot |
| C1GALT1C1 | 8.52E-05    | 0.000202616 | 0.806102 | <b>-1.24054</b> | cold down vs hot |
| IER5      | 0.00441122  | 0.00638371  | 0.806084 | <b>-1.24057</b> | cold down vs hot |
| C12orf62  | 2.43E-05    | 6.47E-05    | 0.806017 | <b>-1.24067</b> | cold down vs hot |
| NANS      | 0.00487791  | 0.00694816  | 0.805917 | <b>-1.24082</b> | cold down vs hot |
| TLN1      | 0.000138407 | 0.000313685 | 0.805034 | <b>-1.24218</b> | cold down vs hot |
| ZBTB8OS   | 0.000142945 | 0.000322934 | 0.804967 | <b>-1.24229</b> | cold down vs hot |
| SELS      | 0.00018368  | 0.000399607 | 0.804326 | <b>-1.24328</b> | cold down vs hot |
| C20orf196 | 0.00216215  | 0.00349039  | 0.803852 | <b>-1.24401</b> | cold down vs hot |
| DIAPH1    | 6.37E-05    | 0.000156033 | 0.803251 | <b>-1.24494</b> | cold down vs hot |
| PARP16    | 0.000516593 | 0.00100766  | 0.80312  | <b>-1.24514</b> | cold down vs hot |
| FMNL3     | 0.000263948 | 0.000552325 | 0.803082 | <b>-1.2452</b>  | cold down vs hot |
| FIG4      | 0.00102938  | 0.00184562  | 0.802931 | <b>-1.24544</b> | cold down vs hot |
| PSMA5     | 1.91E-06    | 6.11E-06    | 0.802455 | <b>-1.24618</b> | cold down vs hot |
| GNG10     | 0.000355978 | 0.000721536 | 0.802173 | <b>-1.24661</b> | cold down vs hot |
| PSMA4     | 3.29E-05    | 8.50E-05    | 0.801907 | <b>-1.24703</b> | cold down vs hot |
| C7orf43   | 0.000427177 | 0.000852091 | 0.801867 | <b>-1.24709</b> | cold down vs hot |
| RBL2      | 0.00426258  | 0.00620438  | 0.801576 | <b>-1.24754</b> | cold down vs hot |
| HDAC1     | 5.65E-05    | 0.000139828 | 0.801497 | <b>-1.24767</b> | cold down vs hot |
| DOPEY2    | 0.00125925  | 0.00219223  | 0.801165 | <b>-1.24818</b> | cold down vs hot |
| SEPX1     | 0.000513372 | 0.00100198  | 0.801061 | <b>-1.24834</b> | cold down vs hot |
| MAP4K2    | 0.0060018   | 0.00823109  | 0.800681 | <b>-1.24894</b> | cold down vs hot |
| MYL12A    | 4.19E-05    | 0.000106364 | 0.800672 | <b>-1.24895</b> | cold down vs hot |
| LAMP2     | 0.00139562  | 0.00239451  | 0.800599 | <b>-1.24906</b> | cold down vs hot |
| PCK2      | 0.0068292   | 0.00920717  | 0.799754 | <b>-1.25038</b> | cold down vs hot |
| ZSCAN16   | 0.00680688  | 0.00918467  | 0.799314 | <b>-1.25107</b> | cold down vs hot |
| DCK       | 0.00370342  | 0.005521    | 0.799082 | <b>-1.25144</b> | cold down vs hot |
| CASP3     | 0.000148052 | 0.000332973 | 0.798882 | <b>-1.25175</b> | cold down vs hot |
| SH3BP2    | 7.54E-05    | 0.000181716 | 0.798848 | <b>-1.2518</b>  | cold down vs hot |
| C22orf27  | 0.00133567  | 0.00231111  | 0.798812 | <b>-1.25186</b> | cold down vs hot |
| IRF3      | 4.36E-05    | 0.000110461 | 0.797905 | <b>-1.25328</b> | cold down vs hot |
| SLC44A2   | 0.00411411  | 0.00602455  | 0.797785 | <b>-1.25347</b> | cold down vs hot |
| CAPZA1    | 0.000130802 | 0.000298185 | 0.797743 | <b>-1.25354</b> | cold down vs hot |
| SERTAD3   | 2.26E-05    | 6.04E-05    | 0.797523 | <b>-1.25388</b> | cold down vs hot |
| LINS1     | 0.000193531 | 0.000419221 | 0.797474 | <b>-1.25396</b> | cold down vs hot |
| AKIRIN2   | 2.62E-05    | 6.92E-05    | 0.797058 | <b>-1.25461</b> | cold down vs hot |
| GABARAPL1 | 0.00186809  | 0.00307578  | 0.796989 | <b>-1.25472</b> | cold down vs hot |
| CYB561D2  | 0.000171214 | 0.000376629 | 0.796886 | <b>-1.25489</b> | cold down vs hot |
| STK38     | 4.85E-05    | 0.000121706 | 0.796753 | <b>-1.25509</b> | cold down vs hot |
| FBXL5     | 0.000296278 | 0.000612321 | 0.796354 | <b>-1.25572</b> | cold down vs hot |
| ZBTB2     | 8.02E-06    | 2.32E-05    | 0.796254 | <b>-1.25588</b> | cold down vs hot |
| DEDD2     | 0.000537153 | 0.00104265  | 0.795988 | <b>-1.2563</b>  | cold down vs hot |
| S100A11   | 0.0060392   | 0.00827717  | 0.795934 | <b>-1.25639</b> | cold down vs hot |
| SETX      | 0.000222698 | 0.000473753 | 0.795828 | <b>-1.25655</b> | cold down vs hot |
| PLA2G15   | 0.00244461  | 0.00359858  | 0.795733 | <b>-1.2567</b>  | cold down vs hot |
| MCEE      | 0.000561057 | 0.00108306  | 0.795627 | <b>-1.25687</b> | cold down vs hot |
| C3orf71   | 0.00244211  | 0.00386209  | 0.795615 | <b>-1.25689</b> | cold down vs hot |
| CCND3     | 0.00204854  | 0.0033342   | 0.795086 | <b>-1.25773</b> | cold down vs hot |
| PRPS2     | 0.00316173  | 0.00483721  | 0.794964 | <b>-1.25792</b> | cold down vs hot |
| TCEAL6    | 0.00690357  | 0.00928301  | 0.794833 | <b>-1.25813</b> | cold down vs hot |
| LOC729678 | 0.00320771  | 0.00490065  | 0.794624 | <b>-1.25846</b> | cold down vs hot |
| SCAMP2    | 4.44E-06    | 1.34E-05    | 0.794465 | <b>-1.25871</b> | cold down vs hot |
| ANAPC16   | 4.73E-06    | 1.42E-05    | 0.794376 | <b>-1.25885</b> | cold down vs hot |
| KIAA1539  | 0.00209649  | 0.00339867  | 0.793813 | <b>-1.25974</b> | cold down vs hot |
| WHAMM     | 1.53E-05    | 4.22E-05    | 0.793805 | <b>-1.25976</b> | cold down vs hot |
| CDKN1B    | 2.67E-05    | 7.05E-05    | 0.793633 | <b>-1.26003</b> | cold down vs hot |
| AP1B1     | 4.04E-05    | 0.000102822 | 0.793408 | <b>-1.26039</b> | cold down vs hot |
| SELT      | 0.000849331 | 0.00156325  | 0.79325  | <b>-1.26064</b> | cold down vs hot |
| POU6F1    | 0.00576529  | 0.00795162  | 0.793102 | <b>-1.26087</b> | cold down vs hot |
| TMEM50A   | 2.11E-07    | 7.61E-07    | 0.792812 | <b>-1.26133</b> | cold down vs hot |
| NAGPA     | 0.00032625  | 0.000667919 | 0.792564 | <b>-1.26173</b> | cold down vs hot |
| RP2       | 0.00235754  | 0.00374742  | 0.792488 | <b>-1.26185</b> | cold down vs hot |
| ANKRD49   | 0.00544389  | 0.00759198  | 0.792037 | <b>-1.26257</b> | cold down vs hot |
| PLD3      | 0.00171046  | 0.00285223  | 0.791728 | <b>-1.26306</b> | cold down vs hot |
| NFKB1     | 4.71E-05    | 0.00011856  | 0.791592 | <b>-1.26328</b> | cold down vs hot |
| RASA4P    | 0.00698714  | 0.0093775   | 0.791552 | <b>-1.26334</b> | cold down vs hot |
| ERP44     | 9.20E-06    | 2.64E-05    | 0.79142  | <b>-1.26355</b> | cold down vs hot |
| ZDHC24    | 0.00334278  | 0.00506318  | 0.791395 | <b>-1.26359</b> | cold down vs hot |
| KIAA0494  | 8.89E-06    | 2.55E-05    | 0.791155 | <b>-1.26397</b> | cold down vs hot |
| LMNB1     | 0.00573406  | 0.00791545  | 0.790701 | <b>-1.2647</b>  | cold down vs hot |
| ZNF217    | 0.000553686 | 0.00107169  | 0.790549 | <b>-1.26494</b> | cold down vs hot |
| MLLT6     | 7.60E-05    | 0.000183281 | 0.790359 | <b>-1.26525</b> | cold down vs hot |

|            |             |             |          |                 |                  |
|------------|-------------|-------------|----------|-----------------|------------------|
| WTAP       | 3.03E-05    | 7.90E-05    | 0.789972 | <b>-1.26587</b> | cold down vs hot |
| SFI1       | 0.00058735  | 0.00112715  | 0.789764 | <b>-1.2662</b>  | cold down vs hot |
| PTP4A2     | 1.49E-06    | 4.82E-06    | 0.789571 | <b>-1.26651</b> | cold down vs hot |
| MAN2B2     | 0.000555365 | 0.00107462  | 0.789522 | <b>-1.26659</b> | cold down vs hot |
| FBXW4      | 0.000259748 | 0.00054406  | 0.789504 | <b>-1.26662</b> | cold down vs hot |
| RSU1       | 5.89E-05    | 0.000145335 | 0.78942  | <b>-1.26675</b> | cold down vs hot |
| MTO1       | 6.99E-05    | 0.000169786 | 0.789384 | <b>-1.26681</b> | cold down vs hot |
| RAB24      | 0.000284796 | 0.000591964 | 0.789336 | <b>-1.26689</b> | cold down vs hot |
| BLVRB      | 0.00187511  | 0.00308278  | 0.78918  | <b>-1.26714</b> | cold down vs hot |
| PFN1       | 0.000143765 | 0.000324561 | 0.78917  | <b>-1.26715</b> | cold down vs hot |
| DBNL       | 3.62E-05    | 9.29E-05    | 0.788911 | <b>-1.26757</b> | cold down vs hot |
| TANK       | 0.00385204  | 0.00570478  | 0.788866 | <b>-1.26764</b> | cold down vs hot |
| C2orf18    | 0.000214688 | 0.000459861 | 0.788858 | <b>-1.26766</b> | cold down vs hot |
| TWF2       | 0.000219024 | 0.000467615 | 0.788472 | <b>-1.26828</b> | cold down vs hot |
| CAST       | 0.000474896 | 0.000935271 | 0.78796  | <b>-1.2691</b>  | cold down vs hot |
| NCOA1      | 2.35E-05    | 6.25E-05    | 0.787664 | <b>-1.26958</b> | cold down vs hot |
| RNPEPL1    | 0.000869237 | 0.0015936   | 0.787642 | <b>-1.26961</b> | cold down vs hot |
| TMEM62     | 0.000286935 | 0.00059584  | 0.787365 | <b>-1.27006</b> | cold down vs hot |
| UBE2A      | 2.52E-08    | 9.98E-08    | 0.787352 | <b>-1.27008</b> | cold down vs hot |
| TSPAN17    | 9.98E-05    | 0.000233918 | 0.787227 | <b>-1.27028</b> | cold down vs hot |
| SLC25A19   | 0.000183591 | 0.000399607 | 0.787217 | <b>-1.2703</b>  | cold down vs hot |
| ANKHD1-EI  | 0.000397823 | 0.000798122 | 0.787105 | <b>-1.27048</b> | cold down vs hot |
| SH3KBP1    | 0.00450542  | 0.00649843  | 0.787016 | <b>-1.27062</b> | cold down vs hot |
| TCEANC     | 0.000144056 | 0.000325105 | 0.786937 | <b>-1.27075</b> | cold down vs hot |
| MAN2B1     | 0.000111185 | 0.000258153 | 0.786765 | <b>-1.27103</b> | cold down vs hot |
| SYNPO      | 0.00581359  | 0.00800999  | 0.786531 | <b>-1.27141</b> | cold down vs hot |
| PSMB3      | 5.81E-06    | 1.71E-05    | 0.786479 | <b>-1.27149</b> | cold down vs hot |
| PXK        | 0.00516837  | 0.00726674  | 0.7863   | <b>-1.27178</b> | cold down vs hot |
| ATG7       | 3.16E-09    | 1.37E-08    | 0.786196 | <b>-1.27195</b> | cold down vs hot |
| CD97       | 0.00352626  | 0.00530049  | 0.785368 | <b>-1.27329</b> | cold down vs hot |
| STK4       | 5.82E-06    | 1.71E-05    | 0.784819 | <b>-1.27418</b> | cold down vs hot |
| SS18L2     | 3.82E-06    | 1.16E-05    | 0.784143 | <b>-1.27528</b> | cold down vs hot |
| ANKDD1A    | 0.00504996  | 0.00713871  | 0.7837   | <b>-1.276</b>   | cold down vs hot |
| NADSYN1    | 0.00111355  | 0.00197653  | 0.783609 | <b>-1.27615</b> | cold down vs hot |
| ECHDC1     | 0.00748487  | 0.00992508  | 0.783429 | <b>-1.27644</b> | cold down vs hot |
| SERPINB6   | 0.00341392  | 0.00515547  | 0.783355 | <b>-1.27656</b> | cold down vs hot |
| SPATA24    | 0.00201375  | 0.00328576  | 0.78276  | <b>-1.27753</b> | cold down vs hot |
| OSBPL7     | 0.00553594  | 0.00769732  | 0.782573 | <b>-1.27784</b> | cold down vs hot |
| MTM1       | 0.000671629 | 0.00126808  | 0.782059 | <b>-1.27868</b> | cold down vs hot |
| BMP2K      | 0.00113839  | 0.00201407  | 0.781927 | <b>-1.27889</b> | cold down vs hot |
| SHKBP1     | 0.000457419 | 0.000905221 | 0.781673 | <b>-1.27931</b> | cold down vs hot |
| IFI16      | 0.00367716  | 0.00549189  | 0.781658 | <b>-1.27933</b> | cold down vs hot |
| ADPGK      | 2.06E-08    | 8.25E-08    | 0.781564 | <b>-1.27949</b> | cold down vs hot |
| TINF2      | 2.36E-08    | 9.37E-08    | 0.781095 | <b>-1.28025</b> | cold down vs hot |
| GMPPB      | 0.000303233 | 0.000625308 | 0.780865 | <b>-1.28063</b> | cold down vs hot |
| LASP1      | 4.63E-07    | 1.61E-06    | 0.780857 | <b>-1.28064</b> | cold down vs hot |
| SLC25A20   | 0.000173997 | 0.000382235 | 0.780517 | <b>-1.2812</b>  | cold down vs hot |
| PASK       | 0.000432156 | 0.00086098  | 0.780362 | <b>-1.28146</b> | cold down vs hot |
| JMJD7-PLA2 | 0.00047214  | 0.000930966 | 0.780051 | <b>-1.28197</b> | cold down vs hot |
| MKNK2      | 8.39E-05    | 0.000200033 | 0.779883 | <b>-1.28224</b> | cold down vs hot |
| GLA        | 0.00010798  | 0.000251518 | 0.779637 | <b>-1.28265</b> | cold down vs hot |
| PDK3       | 0.00446308  | 0.00644733  | 0.779317 | <b>-1.28317</b> | cold down vs hot |
| PAK1       | 0.00519633  | 0.00730134  | 0.779192 | <b>-1.28338</b> | cold down vs hot |
| LOC100303  | 0.0041953   | 0.00612146  | 0.779178 | <b>-1.2834</b>  | cold down vs hot |
| VPS13C     | 0.00682349  | 0.00920137  | 0.779121 | <b>-1.2835</b>  | cold down vs hot |
| C3orf37    | 3.28E-06    | 1.01E-05    | 0.778863 | <b>-1.28392</b> | cold down vs hot |
| CDR2       | 0.000262405 | 0.000549271 | 0.77799  | <b>-1.28536</b> | cold down vs hot |
| ABHD12     | 2.17E-05    | 5.82E-05    | 0.777904 | <b>-1.2855</b>  | cold down vs hot |
| DTX2       | 1.73E-05    | 4.71E-05    | 0.777502 | <b>-1.28617</b> | cold down vs hot |
| MAP3K3     | 5.49E-05    | 0.000136289 | 0.777394 | <b>-1.28635</b> | cold down vs hot |
| LIMK1      | 0.00719533  | 0.00961144  | 0.776242 | <b>-1.28826</b> | cold down vs hot |
| CCDC84     | 0.0023233   | 0.00370649  | 0.776208 | <b>-1.28831</b> | cold down vs hot |
| NCK1       | 1.20E-05    | 3.37E-05    | 0.774657 | <b>-1.29089</b> | cold down vs hot |
| ENG        | 0.000417282 | 0.000833627 | 0.773871 | <b>-1.29221</b> | cold down vs hot |
| RNF181     | 7.60E-07    | 2.57E-06    | 0.773754 | <b>-1.2924</b>  | cold down vs hot |
| MKNK1      | 4.08E-10    | 1.90E-09    | 0.773347 | <b>-1.29308</b> | cold down vs hot |
| ESRP2      | 0.00011421  | 0.0002648   | 0.773052 | <b>-1.29357</b> | cold down vs hot |
| AKTIP      | 0.000166876 | 0.000368577 | 0.77278  | <b>-1.29403</b> | cold down vs hot |
| GRIPAP1    | 2.15E-10    | 1.03E-09    | 0.772224 | <b>-1.29496</b> | cold down vs hot |
| SUB1       | 2.05E-05    | 5.51E-05    | 0.771941 | <b>-1.29543</b> | cold down vs hot |
| TDRKH      | 0.00320464  | 0.00489713  | 0.771612 | <b>-1.29599</b> | cold down vs hot |
| TRAF5      | 0.00350443  | 0.00527375  | 0.77138  | <b>-1.29638</b> | cold down vs hot |
| C15orf21   | 0.00040329  | 0.000808148 | 0.771366 | <b>-1.2964</b>  | cold down vs hot |
| NOD1       | 8.73E-08    | 3.29E-07    | 0.771285 | <b>-1.29654</b> | cold down vs hot |
| TRAF3      | 2.25E-05    | 6.02E-05    | 0.771175 | <b>-1.29672</b> | cold down vs hot |
| VASP       | 4.33E-06    | 1.31E-05    | 0.771116 | <b>-1.29682</b> | cold down vs hot |
| TAZ        | 2.53E-06    | 7.94E-06    | 0.771021 | <b>-1.29698</b> | cold down vs hot |

|          |             |             |          |                 |                  |
|----------|-------------|-------------|----------|-----------------|------------------|
| ETS1     | 0.0032387   | 0.00493185  | 0.770578 | <b>-1.29773</b> | cold down vs hot |
| SIDT2    | 0.000117709 | 0.000272332 | 0.770512 | <b>-1.29784</b> | cold down vs hot |
| MSN      | 6.06E-05    | 0.00014898  | 0.770478 | <b>-1.2979</b>  | cold down vs hot |
| C9orf142 | 0.00205254  | 0.00333833  | 0.770239 | <b>-1.2983</b>  | cold down vs hot |
| ATP6V1B2 | 0.00117235  | 0.00206296  | 0.769932 | <b>-1.29882</b> | cold down vs hot |
| PRKCD    | 0.000126181 | 0.000289103 | 0.769457 | <b>-1.29962</b> | cold down vs hot |
| TNIP2    | 4.16E-07    | 1.45E-06    | 0.769377 | <b>-1.29975</b> | cold down vs hot |
| ACTB     | 1.24E-06    | 4.07E-06    | 0.769371 | <b>-1.29976</b> | cold down vs hot |
| TRIM26   | 1.07E-06    | 3.55E-06    | 0.769299 | <b>-1.29989</b> | cold down vs hot |
| AFF1     | 2.39E-05    | 6.37E-05    | 0.769171 | <b>-1.3001</b>  | cold down vs hot |
| FAM102A  | 0.00420175  | 0.00612951  | 0.768898 | <b>-1.30056</b> | cold down vs hot |
| TRAF2    | 2.63E-05    | 6.93E-05    | 0.768174 | <b>-1.30179</b> | cold down vs hot |
| ISOC1    | 7.63E-05    | 0.000183787 | 0.767808 | <b>-1.30241</b> | cold down vs hot |
| MESDC1   | 0.00641037  | 0.0087127   | 0.76772  | <b>-1.30256</b> | cold down vs hot |
| ARL6IP5  | 0.000545538 | 0.00105748  | 0.767627 | <b>-1.30272</b> | cold down vs hot |
| CDK2AP2  | 0.000605181 | 0.00115932  | 0.767488 | <b>-1.30295</b> | cold down vs hot |
| HMGB2    | 0.00237865  | 0.00377636  | 0.767484 | <b>-1.30296</b> | cold down vs hot |
| STK10    | 0.000804131 | 0.00148972  | 0.767467 | <b>-1.30299</b> | cold down vs hot |
| USF1     | 7.54E-09    | 3.16E-08    | 0.767382 | <b>-1.30313</b> | cold down vs hot |
| C10orf26 | 1.14E-07    | 4.21E-07    | 0.766878 | <b>-1.30399</b> | cold down vs hot |
| OGFR     | 6.03E-05    | 0.000148456 | 0.766868 | <b>-1.30401</b> | cold down vs hot |
| FBXO4    | 0.00175133  | 0.00290849  | 0.766298 | <b>-1.30498</b> | cold down vs hot |
| TRIM8    | 7.13E-06    | 2.07E-05    | 0.76621  | <b>-1.30512</b> | cold down vs hot |
| RAB8A    | 3.87E-10    | 1.81E-09    | 0.766084 | <b>-1.30534</b> | cold down vs hot |
| SLC38A6  | 5.33E-05    | 0.000132854 | 0.76603  | <b>-1.30543</b> | cold down vs hot |
| MTMR14   | 2.86E-08    | 1.13E-07    | 0.765854 | <b>-1.30573</b> | cold down vs hot |
| TIPARP   | 0.000132906 | 0.000302558 | 0.765359 | <b>-1.30658</b> | cold down vs hot |
| SYNRG    | 4.33E-07    | 1.51E-06    | 0.765211 | <b>-1.30683</b> | cold down vs hot |
| BLOC1S2  | 7.32E-05    | 0.000177001 | 0.765045 | <b>-1.30711</b> | cold down vs hot |
| MARCKS   | 0.000983402 | 0.00177539  | 0.765046 | <b>-1.30711</b> | cold down vs hot |
| ACSL1    | 0.00252498  | 0.00397006  | 0.764764 | <b>-1.30759</b> | cold down vs hot |
| NDUFA2   | 8.80E-06    | 2.54E-05    | 0.764558 | <b>-1.30794</b> | cold down vs hot |
| WBP2     | 0.000382802 | 0.000769929 | 0.764552 | <b>-1.30796</b> | cold down vs hot |
| NEK8     | 0.00138454  | 0.00237738  | 0.764077 | <b>-1.30877</b> | cold down vs hot |
| PIP4K2A  | 0.00011228  | 0.00199027  | 0.763562 | <b>-1.30965</b> | cold down vs hot |
| ROD1     | 3.13E-05    | 8.12E-05    | 0.763501 | <b>-1.30976</b> | cold down vs hot |
| DRAM2    | 3.80E-06    | 1.16E-05    | 0.763133 | <b>-1.31039</b> | cold down vs hot |
| PDE4DIP  | 0.00261585  | 0.00409122  | 0.763046 | <b>-1.31054</b> | cold down vs hot |
| DDHD1    | 0.000883051 | 0.00161484  | 0.762977 | <b>-1.31066</b> | cold down vs hot |
| ARID5B   | 0.00752493  | 0.00996411  | 0.762967 | <b>-1.31067</b> | cold down vs hot |
| TRMT2B   | 5.35E-06    | 1.59E-05    | 0.762915 | <b>-1.31076</b> | cold down vs hot |
| SDSL     | 0.00555338  | 0.00771422  | 0.762778 | <b>-1.311</b>   | cold down vs hot |
| SQSTM1   | 0.000837719 | 0.00154493  | 0.762734 | <b>-1.31107</b> | cold down vs hot |
| AGTRAP   | 0.000158454 | 0.000353203 | 0.762666 | <b>-1.31119</b> | cold down vs hot |
| ITM2B    | 0.000335885 | 0.000686345 | 0.76232  | <b>-1.31179</b> | cold down vs hot |
| CPEB4    | 0.00357261  | 0.00535413  | 0.761906 | <b>-1.3125</b>  | cold down vs hot |
| FAM53B   | 0.00749037  | 0.00993035  | 0.761897 | <b>-1.31251</b> | cold down vs hot |
| C17orf49 | 1.91E-05    | 5.16E-05    | 0.761856 | <b>-1.31258</b> | cold down vs hot |
| YPEL5    | 1.22E-06    | 4.01E-06    | 0.761437 | <b>-1.31331</b> | cold down vs hot |
| RPL13P5  | 0.00616169  | 0.00841508  | 0.761324 | <b>-1.3135</b>  | cold down vs hot |
| FOXN3    | 0.000678374 | 0.00127852  | 0.761189 | <b>-1.31373</b> | cold down vs hot |
| ARNTL    | 0.000347511 | 0.000706791 | 0.76105  | <b>-1.31397</b> | cold down vs hot |
| ARSA     | 0.00234083  | 0.00372811  | 0.760934 | <b>-1.31418</b> | cold down vs hot |
| DNAJB9   | 0.00157847  | 0.00266206  | 0.760898 | <b>-1.31424</b> | cold down vs hot |
| RBM38    | 0.00354156  | 0.00531878  | 0.760739 | <b>-1.31451</b> | cold down vs hot |
| STAT3    | 6.24E-07    | 2.14E-06    | 0.760714 | <b>-1.31456</b> | cold down vs hot |
| PPAPDC1B | 0.00116855  | 0.00205905  | 0.760577 | <b>-1.31479</b> | cold down vs hot |
| PCSK7    | 1.76E-05    | 4.78E-05    | 0.760542 | <b>-1.31485</b> | cold down vs hot |
| CCDC53   | 1.79E-06    | 5.74E-06    | 0.759607 | <b>-1.31647</b> | cold down vs hot |
| PTPN2    | 1.24E-05    | 3.48E-05    | 0.759215 | <b>-1.31715</b> | cold down vs hot |
| PSMA3    | 4.23E-08    | 1.64E-07    | 0.758944 | <b>-1.31762</b> | cold down vs hot |
| SFXN2    | 0.00152182  | 0.00257985  | 0.758754 | <b>-1.31795</b> | cold down vs hot |
| ARPC1B   | 0.0015684   | 0.00264712  | 0.758096 | <b>-1.31909</b> | cold down vs hot |
| TMEM2    | 0.00468789  | 0.00672298  | 0.757915 | <b>-1.31941</b> | cold down vs hot |
| SPPL2A   | 5.01E-05    | 0.00012553  | 0.757282 | <b>-1.32051</b> | cold down vs hot |
| CAPN12   | 0.000982965 | 0.00177518  | 0.756729 | <b>-1.32148</b> | cold down vs hot |
| GRK5     | 0.000340074 | 0.000693239 | 0.75563  | <b>-1.3234</b>  | cold down vs hot |
| C9orf23  | 0.00269538  | 0.00420455  | 0.755598 | <b>-1.32345</b> | cold down vs hot |
| DAZAP2   | 6.75E-09    | 2.84E-08    | 0.755379 | <b>-1.32384</b> | cold down vs hot |
| DCLRE1C  | 0.000621125 | 0.00118638  | 0.755364 | <b>-1.32386</b> | cold down vs hot |
| ACCS     | 0.0025524   | 0.00400449  | 0.754485 | <b>-1.32541</b> | cold down vs hot |
| BCL2L1   | 1.15E-05    | 3.26E-05    | 0.754453 | <b>-1.32546</b> | cold down vs hot |
| RNF130   | 2.07E-06    | 6.57E-06    | 0.754328 | <b>-1.32568</b> | cold down vs hot |
| RBKS     | 0.00541045  | 0.00755665  | 0.754132 | <b>-1.32603</b> | cold down vs hot |
| CSK      | 1.45E-05    | 3.99E-05    | 0.75357  | <b>-1.32702</b> | cold down vs hot |
| NCOA3    | 5.47E-06    | 1.62E-05    | 0.753487 | <b>-1.32716</b> | cold down vs hot |
| MYH9     | 1.59E-05    | 4.36E-05    | 0.753385 | <b>-1.32734</b> | cold down vs hot |

|           |             |             |          |                 |                  |
|-----------|-------------|-------------|----------|-----------------|------------------|
| PPAP2A    | 0.000174614 | 0.000383204 | 0.753346 | <b>-1.32741</b> | cold down vs hot |
| MAST3     | 2.47E-05    | 6.57E-05    | 0.753222 | <b>-1.32763</b> | cold down vs hot |
| EHD1      | 1.08E-05    | 3.06E-05    | 0.753049 | <b>-1.32793</b> | cold down vs hot |
| PNKD      | 1.81E-05    | 4.91E-05    | 0.752463 | <b>-1.32897</b> | cold down vs hot |
| PBXIP1    | 0.000121534 | 0.000280075 | 0.752258 | <b>-1.32933</b> | cold down vs hot |
| STAT5B    | 1.22E-07    | 4.51E-07    | 0.752253 | <b>-1.32934</b> | cold down vs hot |
| FICD      | 0.00115694  | 0.00204135  | 0.752177 | <b>-1.32947</b> | cold down vs hot |
| SOAT1     | 0.000995414 | 0.0017922   | 0.751802 | <b>-1.33014</b> | cold down vs hot |
| ARPC3     | 9.42E-11    | 4.60E-10    | 0.751419 | <b>-1.33082</b> | cold down vs hot |
| ESAM      | 0.00183767  | 0.00303411  | 0.751307 | <b>-1.33101</b> | cold down vs hot |
| SLC25A42  | 0.000246372 | 0.000518705 | 0.751011 | <b>-1.33154</b> | cold down vs hot |
| ZNF688    | 4.05E-05    | 0.0001031   | 0.750865 | <b>-1.3318</b>  | cold down vs hot |
| LOC541471 | 0.00205317  | 0.00333833  | 0.750414 | <b>-1.3326</b>  | cold down vs hot |
| MANBA     | 0.00248874  | 0.00392064  | 0.750071 | <b>-1.33321</b> | cold down vs hot |
| GATS      | 0.00178524  | 0.00295503  | 0.750005 | <b>-1.33333</b> | cold down vs hot |
| CNDP2     | 4.05E-06    | 1.23E-05    | 0.749877 | <b>-1.33355</b> | cold down vs hot |
| F8A1      | 0.000288689 | 0.000598935 | 0.749005 | <b>-1.3351</b>  | cold down vs hot |
| SNX11     | 2.72E-09    | 1.19E-08    | 0.748975 | <b>-1.33516</b> | cold down vs hot |
| TRIM5     | 0.000145523 | 0.000328077 | 0.748907 | <b>-1.33528</b> | cold down vs hot |
| STX4      | 1.18E-10    | 5.72E-10    | 0.747711 | <b>-1.33742</b> | cold down vs hot |
| SPSB2     | 0.000118916 | 0.000274735 | 0.747223 | <b>-1.33829</b> | cold down vs hot |
| GIYD2     | 0.000214165 | 0.000458891 | 0.747155 | <b>-1.33841</b> | cold down vs hot |
| CEBPB     | 0.000353868 | 0.00071793  | 0.74711  | <b>-1.33849</b> | cold down vs hot |
| COX17     | 7.64E-05    | 0.000183938 | 0.747067 | <b>-1.33857</b> | cold down vs hot |
| WWC3      | 0.000649821 | 0.00123111  | 0.746697 | <b>-1.33923</b> | cold down vs hot |
| TESK1     | 4.08E-05    | 0.000103777 | 0.74662  | <b>-1.33937</b> | cold down vs hot |
| SSR4      | 2.84E-05    | 7.42E-05    | 0.746594 | <b>-1.33942</b> | cold down vs hot |
| PRKD2     | 1.81E-07    | 6.59E-07    | 0.746385 | <b>-1.33979</b> | cold down vs hot |
| ADC       | 0.00145729  | 0.00248659  | 0.746047 | <b>-1.3404</b>  | cold down vs hot |
| KIAA0226  | 1.66E-07    | 6.07E-07    | 0.745529 | <b>-1.34133</b> | cold down vs hot |
| SGPL1     | 6.16E-07    | 2.11E-06    | 0.745531 | <b>-1.34133</b> | cold down vs hot |
| ACSL4     | 0.00153144  | 0.00259279  | 0.7453   | <b>-1.34174</b> | cold down vs hot |
| AKAP13    | 3.05E-06    | 9.43E-06    | 0.745162 | <b>-1.34199</b> | cold down vs hot |
| MMP19     | 0.000305125 | 0.000628345 | 0.744765 | <b>-1.3427</b>  | cold down vs hot |
| RNASEH2B  | 4.02E-05    | 0.000102358 | 0.744523 | <b>-1.34314</b> | cold down vs hot |
| C9orf91   | 0.000574683 | 0.00110575  | 0.744209 | <b>-1.34371</b> | cold down vs hot |
| RAPGEF1   | 1.59E-05    | 4.36E-05    | 0.743943 | <b>-1.34419</b> | cold down vs hot |
| RINL      | 0.00427112  | 0.00621543  | 0.743425 | <b>-1.34513</b> | cold down vs hot |
| MAN2A1    | 0.00231772  | 0.00370034  | 0.743327 | <b>-1.3453</b>  | cold down vs hot |
| IKBKG     | 1.10E-07    | 4.10E-07    | 0.742732 | <b>-1.34638</b> | cold down vs hot |
| KIAA1147  | 0.00503455  | 0.00712155  | 0.742733 | <b>-1.34638</b> | cold down vs hot |
| ZNF238    | 0.00457978  | 0.00658966  | 0.742494 | <b>-1.34681</b> | cold down vs hot |
| OTUD1     | 6.15E-06    | 1.81E-05    | 0.742408 | <b>-1.34697</b> | cold down vs hot |
| C5orf32   | 0.000623875 | 0.00119059  | 0.741535 | <b>-1.34855</b> | cold down vs hot |
| LOC158376 | 0.00736142  | 0.00978922  | 0.741538 | <b>-1.34855</b> | cold down vs hot |
| SAR1B     | 2.62E-05    | 6.93E-05    | 0.741401 | <b>-1.3488</b>  | cold down vs hot |
| IQCG      | 0.00236911  | 0.00376397  | 0.741066 | <b>-1.34941</b> | cold down vs hot |
| SGPP1     | 7.16E-05    | 0.000173635 | 0.740897 | <b>-1.34971</b> | cold down vs hot |
| FKBP15    | 1.65E-09    | 7.33E-09    | 0.740635 | <b>-1.35019</b> | cold down vs hot |
| ROGDI     | 0.00010233  | 0.000239381 | 0.740627 | <b>-1.35021</b> | cold down vs hot |
| SMAD6     | 0.00618792  | 0.00843847  | 0.740422 | <b>-1.35058</b> | cold down vs hot |
| ACTR3     | 6.60E-08    | 2.53E-07    | 0.739856 | <b>-1.35162</b> | cold down vs hot |
| EPB41L2   | 0.00122673  | 0.00214259  | 0.739742 | <b>-1.35182</b> | cold down vs hot |
| C22orf26  | 0.0023024   | 0.00367859  | 0.739175 | <b>-1.35286</b> | cold down vs hot |
| RABGAP1L  | 4.42E-06    | 1.33E-05    | 0.739156 | <b>-1.35289</b> | cold down vs hot |
| KIAA0922  | 5.84E-05    | 0.000144323 | 0.739065 | <b>-1.35306</b> | cold down vs hot |
| RAP2C     | 0.000150559 | 0.000337795 | 0.738883 | <b>-1.35339</b> | cold down vs hot |
| ATG4A     | 2.63E-06    | 8.22E-06    | 0.738651 | <b>-1.35382</b> | cold down vs hot |
| RNF122    | 0.000226144 | 0.000480144 | 0.73843  | <b>-1.35422</b> | cold down vs hot |
| MFSD1     | 2.71E-07    | 9.65E-07    | 0.738372 | <b>-1.35433</b> | cold down vs hot |
| LDLRAP1   | 0.00017056  | 0.000375443 | 0.738206 | <b>-1.35464</b> | cold down vs hot |
| MBD4      | 2.03E-08    | 8.15E-08    | 0.738074 | <b>-1.35488</b> | cold down vs hot |
| NDST2     | 6.21E-10    | 2.85E-09    | 0.737644 | <b>-1.35567</b> | cold down vs hot |
| ZMIZ2     | 1.18E-06    | 3.87E-06    | 0.737179 | <b>-1.35652</b> | cold down vs hot |
| SMAD7     | 0.000446184 | 0.000886213 | 0.736862 | <b>-1.35711</b> | cold down vs hot |
| PPP3CC    | 3.03E-07    | 1.07E-06    | 0.736387 | <b>-1.35798</b> | cold down vs hot |
| HERC3     | 4.97E-05    | 0.000124479 | 0.736328 | <b>-1.35809</b> | cold down vs hot |
| GRK6      | 5.36E-06    | 1.59E-05    | 0.736149 | <b>-1.35842</b> | cold down vs hot |
| SIRT7     | 1.33E-06    | 4.33E-06    | 0.735075 | <b>-1.36041</b> | cold down vs hot |
| RALGDS    | 3.28E-06    | 1.01E-05    | 0.734774 | <b>-1.36096</b> | cold down vs hot |
| SYNJ2     | 0.00383626  | 0.00568787  | 0.734744 | <b>-1.36102</b> | cold down vs hot |
| SMARCA2   | 0.000226062 | 0.000480127 | 0.734355 | <b>-1.36174</b> | cold down vs hot |
| PARD6A    | 0.00514302  | 0.00724515  | 0.733985 | <b>-1.36243</b> | cold down vs hot |
| STK17A    | 0.0043322   | 0.00628609  | 0.732977 | <b>-1.3643</b>  | cold down vs hot |
| STAMBPL1  | 0.00675693  | 0.00913048  | 0.732703 | <b>-1.36481</b> | cold down vs hot |
| DNASE2    | 1.31E-05    | 3.66E-05    | 0.732394 | <b>-1.36539</b> | cold down vs hot |
| RNF149    | 1.78E-08    | 7.18E-08    | 0.731335 | <b>-1.36736</b> | cold down vs hot |

|           |             |             |          |                 |                  |
|-----------|-------------|-------------|----------|-----------------|------------------|
| SLC2A8    | 0.00062204  | 0.00118778  | 0.731322 | <b>-1.36739</b> | cold down vs hot |
| JHDM1D    | 0.00196872  | 0.00322277  | 0.731277 | <b>-1.36747</b> | cold down vs hot |
| DAB2      | 0.00080017  | 0.00148365  | 0.731245 | <b>-1.36753</b> | cold down vs hot |
| CTSA      | 0.0001271   | 0.000290963 | 0.731203 | <b>-1.36761</b> | cold down vs hot |
| ARRB1     | 0.00224225  | 0.00359568  | 0.730981 | <b>-1.36803</b> | cold down vs hot |
| ANXA11    | 4.52E-07    | 1.57E-06    | 0.730941 | <b>-1.3681</b>  | cold down vs hot |
| RAB30     | 0.00131833  | 0.00228352  | 0.730638 | <b>-1.36867</b> | cold down vs hot |
| FCHSD1    | 1.94E-05    | 5.24E-05    | 0.730228 | <b>-1.36944</b> | cold down vs hot |
| IL13RA1   | 2.70E-05    | 7.11E-05    | 0.730218 | <b>-1.36945</b> | cold down vs hot |
| CALCOCO2  | 3.80E-09    | 1.64E-08    | 0.730208 | <b>-1.36947</b> | cold down vs hot |
| ATP6V0E1  | 5.61E-09    | 2.38E-08    | 0.729023 | <b>-1.3717</b>  | cold down vs hot |
| GGA2      | 3.09E-07    | 1.09E-06    | 0.728723 | <b>-1.37226</b> | cold down vs hot |
| C9orf46   | 1.80E-05    | 4.88E-05    | 0.728182 | <b>-1.37328</b> | cold down vs hot |
| ISCU      | 7.44E-12    | 3.88E-11    | 0.727913 | <b>-1.37379</b> | cold down vs hot |
| CAPZB     | 2.01E-13    | 1.13E-12    | 0.72781  | <b>-1.37398</b> | cold down vs hot |
| EHBFP1L1  | 3.85E-06    | 1.17E-05    | 0.727811 | <b>-1.37398</b> | cold down vs hot |
| RAB11FIP1 | 3.32E-05    | 8.56E-05    | 0.727778 | <b>-1.37405</b> | cold down vs hot |
| ZFP36L2   | 7.16E-07    | 2.43E-06    | 0.727439 | <b>-1.37469</b> | cold down vs hot |
| MITD1     | 9.72E-08    | 3.63E-07    | 0.727042 | <b>-1.37544</b> | cold down vs hot |
| SIGIRR    | 0.00158714  | 0.00267339  | 0.726988 | <b>-1.37554</b> | cold down vs hot |
| SEC14L1   | 9.54E-06    | 2.73E-05    | 0.726777 | <b>-1.37594</b> | cold down vs hot |
| ZDHHHC12  | 0.000501025 | 0.000980323 | 0.726044 | <b>-1.37733</b> | cold down vs hot |
| SPSB1     | 0.00158765  | 0.00267339  | 0.725708 | <b>-1.37796</b> | cold down vs hot |
| PACS1     | 2.78E-07    | 9.90E-07    | 0.725412 | <b>-1.37853</b> | cold down vs hot |
| EDARADD   | 0.00190297  | 0.00312532  | 0.72539  | <b>-1.37857</b> | cold down vs hot |
| C9orf72   | 0.00437707  | 0.00634133  | 0.725249 | <b>-1.37884</b> | cold down vs hot |
| CCDC159   | 1.68E-05    | 4.59E-05    | 0.724971 | <b>-1.37937</b> | cold down vs hot |
| KANK3     | 0.000598622 | 0.00114743  | 0.724714 | <b>-1.37985</b> | cold down vs hot |
| PIK3R3    | 0.00260897  | 0.00408244  | 0.72402  | <b>-1.38118</b> | cold down vs hot |
| CCM2      | 5.79E-07    | 1.99E-06    | 0.723785 | <b>-1.38163</b> | cold down vs hot |
| ARHGEF1   | 2.20E-06    | 6.96E-06    | 0.723752 | <b>-1.38169</b> | cold down vs hot |
| SLC39A11  | 0.000500003 | 0.000979104 | 0.723705 | <b>-1.38178</b> | cold down vs hot |
| NPC2      | 3.75E-06    | 1.14E-05    | 0.723534 | <b>-1.38211</b> | cold down vs hot |
| CBR3      | 0.000683326 | 0.00128616  | 0.722731 | <b>-1.38364</b> | cold down vs hot |
| CCDC107   | 5.17E-06    | 1.54E-05    | 0.722513 | <b>-1.38406</b> | cold down vs hot |
| UBC       | 3.04E-10    | 1.44E-09    | 0.722135 | <b>-1.38478</b> | cold down vs hot |
| RFX5      | 9.57E-10    | 4.34E-09    | 0.721673 | <b>-1.38567</b> | cold down vs hot |
| U2AF1L4   | 9.22E-08    | 3.46E-07    | 0.721367 | <b>-1.38626</b> | cold down vs hot |
| FILIP1    | 0.0075213   | 0.00996411  | 0.721258 | <b>-1.38647</b> | cold down vs hot |
| ETS2      | 0.000567334 | 0.00109292  | 0.720304 | <b>-1.3883</b>  | cold down vs hot |
| UBE2D1    | 8.45E-07    | 2.84E-06    | 0.719672 | <b>-1.38952</b> | cold down vs hot |
| TOR2A     | 1.23E-05    | 3.44E-05    | 0.719663 | <b>-1.38954</b> | cold down vs hot |
| AKR1B1    | 0.000468039 | 0.000924277 | 0.719617 | <b>-1.38963</b> | cold down vs hot |
| FCHO2     | 0.000902976 | 0.00164616  | 0.719591 | <b>-1.38968</b> | cold down vs hot |
| PPIAL4D   | 0.00367551  | 0.00549069  | 0.71923  | <b>-1.39037</b> | cold down vs hot |
| SLFN5     | 0.00227823  | 0.00364353  | 0.719205 | <b>-1.39042</b> | cold down vs hot |
| MALT1     | 2.88E-05    | 7.53E-05    | 0.718864 | <b>-1.39108</b> | cold down vs hot |
| ORMDL3    | 3.53E-12    | 1.89E-11    | 0.71857  | <b>-1.39165</b> | cold down vs hot |
| C17orf68  | 3.00E-07    | 1.06E-06    | 0.717816 | <b>-1.39311</b> | cold down vs hot |
| LIMK2     | 0.000473848 | 0.000933771 | 0.717275 | <b>-1.39417</b> | cold down vs hot |
| C17orf59  | 6.36E-07    | 2.17E-06    | 0.717233 | <b>-1.39425</b> | cold down vs hot |
| TIAF1     | 2.70E-05    | 7.11E-05    | 0.717204 | <b>-1.3943</b>  | cold down vs hot |
| IFI27L2   | 0.00164135  | 0.00275529  | 0.716837 | <b>-1.39502</b> | cold down vs hot |
| LPCAT3    | 9.99E-07    | 3.33E-06    | 0.716339 | <b>-1.39599</b> | cold down vs hot |
| TP53I11   | 0.00540342  | 0.00754844  | 0.715412 | <b>-1.3978</b>  | cold down vs hot |
| RAB8B     | 2.39E-05    | 6.36E-05    | 0.714864 | <b>-1.39887</b> | cold down vs hot |
| PDGFRB    | 0.00467765  | 0.00671125  | 0.714221 | <b>-1.40013</b> | cold down vs hot |
| FAM69A    | 0.00365565  | 0.00546478  | 0.714188 | <b>-1.40019</b> | cold down vs hot |
| C3orf42   | 0.000173138 | 0.000380476 | 0.71403  | <b>-1.4005</b>  | cold down vs hot |
| CBLB      | 1.26E-05    | 3.53E-05    | 0.713695 | <b>-1.40116</b> | cold down vs hot |
| GALT      | 4.30E-05    | 0.00010903  | 0.71356  | <b>-1.40142</b> | cold down vs hot |
| CCPG1     | 0.00128446  | 0.00223018  | 0.71329  | <b>-1.40195</b> | cold down vs hot |
| SNX29     | 2.10E-08    | 8.39E-08    | 0.712062 | <b>-1.40437</b> | cold down vs hot |
| LOC100286 | 0.000986634 | 0.00178032  | 0.71202  | <b>-1.40445</b> | cold down vs hot |
| C9orf150  | 0.0027054   | 0.00421843  | 0.711831 | <b>-1.40483</b> | cold down vs hot |
| UCP3      | 0.00165143  | 0.00276794  | 0.711798 | <b>-1.40489</b> | cold down vs hot |
| CARD8     | 3.09E-05    | 8.03E-05    | 0.71167  | <b>-1.40514</b> | cold down vs hot |
| KCTD11    | 4.50E-05    | 0.000113657 | 0.711016 | <b>-1.40644</b> | cold down vs hot |
| TRADD     | 4.89E-07    | 1.70E-06    | 0.71097  | <b>-1.40653</b> | cold down vs hot |
| LBR       | 0.000163868 | 0.000363408 | 0.710951 | <b>-1.40657</b> | cold down vs hot |
| CD47      | 3.94E-07    | 1.38E-06    | 0.710766 | <b>-1.40693</b> | cold down vs hot |
| ADAMTSL4  | 0.00467011  | 0.00670191  | 0.710538 | <b>-1.40738</b> | cold down vs hot |
| CMTM7     | 0.000755979 | 0.00140892  | 0.71032  | <b>-1.40782</b> | cold down vs hot |
| CORO7     | 1.09E-05    | 3.09E-05    | 0.710209 | <b>-1.40804</b> | cold down vs hot |
| FLJ42289  | 0.00429804  | 0.00624624  | 0.71006  | <b>-1.40833</b> | cold down vs hot |
| OBFC2A    | 6.62E-05    | 0.000161431 | 0.709993 | <b>-1.40846</b> | cold down vs hot |
| FAM122C   | 5.96E-07    | 2.05E-06    | 0.709913 | <b>-1.40862</b> | cold down vs hot |

|           |             |             |          |                 |                  |
|-----------|-------------|-------------|----------|-----------------|------------------|
| HESX1     | 0.00252774  | 0.00397344  | 0.709803 | <b>-1.40884</b> | cold down vs hot |
| MRAS      | 0.000646255 | 0.00122577  | 0.709742 | <b>-1.40896</b> | cold down vs hot |
| CASP7     | 4.04E-06    | 1.23E-05    | 0.709386 | <b>-1.40967</b> | cold down vs hot |
| CXorf38   | 3.07E-08    | 1.21E-07    | 0.708668 | <b>-1.4111</b>  | cold down vs hot |
| NFATC1    | 0.00368419  | 0.00549863  | 0.708408 | <b>-1.41162</b> | cold down vs hot |
| JAK1      | 7.11E-11    | 3.51E-10    | 0.708113 | <b>-1.4122</b>  | cold down vs hot |
| ITSN2     | 2.56E-06    | 8.01E-06    | 0.707698 | <b>-1.41303</b> | cold down vs hot |
| IL10RB    | 2.08E-11    | 1.07E-10    | 0.707672 | <b>-1.41308</b> | cold down vs hot |
| CSRNP1    | 0.000136262 | 0.00030955  | 0.706825 | <b>-1.41478</b> | cold down vs hot |
| RAB43     | 2.14E-06    | 6.79E-06    | 0.706195 | <b>-1.41604</b> | cold down vs hot |
| NRP1      | 0.00471937  | 0.00675922  | 0.705683 | <b>-1.41707</b> | cold down vs hot |
| DGKZ      | 9.21E-08    | 3.46E-07    | 0.705645 | <b>-1.41714</b> | cold down vs hot |
| BCL6B     | 0.00218971  | 0.00352964  | 0.705497 | <b>-1.41744</b> | cold down vs hot |
| FZD5      | 0.00015222  | 0.000341288 | 0.705469 | <b>-1.4175</b>  | cold down vs hot |
| TBC1D1    | 1.58E-06    | 5.10E-06    | 0.704723 | <b>-1.419</b>   | cold down vs hot |
| ST6GALNA4 | 1.07E-06    | 3.53E-06    | 0.704637 | <b>-1.41917</b> | cold down vs hot |
| ARHGAP18  | 0.000311821 | 0.000641194 | 0.703378 | <b>-1.42171</b> | cold down vs hot |
| AKAP7     | 5.26E-05    | 0.000131222 | 0.70281  | <b>-1.42286</b> | cold down vs hot |
| TTL13     | 0.00112541  | 0.0019938   | 0.702366 | <b>-1.42376</b> | cold down vs hot |
| SLC39A8   | 0.00145886  | 0.00248798  | 0.70183  | <b>-1.42485</b> | cold down vs hot |
| CX3CL1    | 0.00184038  | 0.00303706  | 0.701444 | <b>-1.42563</b> | cold down vs hot |
| ROBO4     | 0.0017534   | 0.00291119  | 0.701374 | <b>-1.42577</b> | cold down vs hot |
| ZNF763    | 0.000660077 | 0.00124872  | 0.701208 | <b>-1.42611</b> | cold down vs hot |
| TBC1D9    | 0.00163125  | 0.00273973  | 0.700905 | <b>-1.42673</b> | cold down vs hot |
| UBE2F     | 7.51E-10    | 3.43E-09    | 0.700474 | <b>-1.4276</b>  | cold down vs hot |
| AP1G2     | 0.00042815  | 0.00085377  | 0.700074 | <b>-1.42842</b> | cold down vs hot |
| TINAGL1   | 0.00678362  | 0.00915707  | 0.699344 | <b>-1.42991</b> | cold down vs hot |
| TRIM38    | 9.07E-11    | 4.44E-10    | 0.699272 | <b>-1.43006</b> | cold down vs hot |
| ANXA7     | 6.35E-12    | 3.34E-11    | 0.699163 | <b>-1.43028</b> | cold down vs hot |
| PLVAP     | 6.40E-05    | 0.000156704 | 0.699155 | <b>-1.4303</b>  | cold down vs hot |
| MBNL1     | 7.50E-06    | 2.17E-05    | 0.69896  | <b>-1.4307</b>  | cold down vs hot |
| APOBEC3B  | 0.0067799   | 0.00915394  | 0.698832 | <b>-1.43096</b> | cold down vs hot |
| SCARNA2   | 0.00737681  | 0.0098037   | 0.698784 | <b>-1.43106</b> | cold down vs hot |
| FAM49B    | 2.31E-09    | 1.01E-08    | 0.698754 | <b>-1.43112</b> | cold down vs hot |
| ATOX1     | 8.81E-05    | 0.000209075 | 0.698612 | <b>-1.43141</b> | cold down vs hot |
| ABCD1     | 0.00676934  | 0.00914157  | 0.698554 | <b>-1.43153</b> | cold down vs hot |
| CCDC102B  | 0.00319712  | 0.00488907  | 0.698254 | <b>-1.43214</b> | cold down vs hot |
| C15orf57  | 4.93E-11    | 2.47E-10    | 0.698068 | <b>-1.43253</b> | cold down vs hot |
| ZDHC18    | 5.66E-11    | 2.81E-10    | 0.697841 | <b>-1.43299</b> | cold down vs hot |
| RASSF7    | 0.000212574 | 0.000455795 | 0.697449 | <b>-1.4338</b>  | cold down vs hot |
| ZHX2      | 0.00100375  | 0.00180473  | 0.697327 | <b>-1.43405</b> | cold down vs hot |
| NUBP1     | 3.41E-13    | 1.90E-12    | 0.697237 | <b>-1.43423</b> | cold down vs hot |
| LOC100130 | 0.000181549 | 0.000395893 | 0.697223 | <b>-1.43426</b> | cold down vs hot |
| ABHD3     | 1.33E-07    | 4.92E-07    | 0.697123 | <b>-1.43447</b> | cold down vs hot |
| KLF4      | 0.00479405  | 0.00684964  | 0.697105 | <b>-1.4345</b>  | cold down vs hot |
| DLL4      | 0.000557325 | 0.00107745  | 0.696772 | <b>-1.43519</b> | cold down vs hot |
| CALML4    | 2.13E-08    | 8.48E-08    | 0.696603 | <b>-1.43554</b> | cold down vs hot |
| LOC401093 | 0.000756855 | 0.00141012  | 0.69646  | <b>-1.43583</b> | cold down vs hot |
| RAP1A     | 5.52E-08    | 2.12E-07    | 0.694331 | <b>-1.44024</b> | cold down vs hot |
| MOBK1B    | 1.10E-08    | 4.50E-08    | 0.694293 | <b>-1.44031</b> | cold down vs hot |
| RNF166    | 8.84E-09    | 3.67E-08    | 0.694149 | <b>-1.44061</b> | cold down vs hot |
| ID3       | 0.0065824   | 0.00891865  | 0.694055 | <b>-1.44081</b> | cold down vs hot |
| PALLD     | 0.00354037  | 0.00531878  | 0.693996 | <b>-1.44093</b> | cold down vs hot |
| LOC115110 | 0.00569022  | 0.0078716   | 0.693976 | <b>-1.44097</b> | cold down vs hot |
| MR1       | 0.000450224 | 0.00089292  | 0.693931 | <b>-1.44107</b> | cold down vs hot |
| BLVRA     | 3.18E-06    | 9.81E-06    | 0.693251 | <b>-1.44248</b> | cold down vs hot |
| KLHL5     | 2.97E-06    | 9.22E-06    | 0.692598 | <b>-1.44384</b> | cold down vs hot |
| IQSEC2    | 4.05E-05    | 0.000103011 | 0.692426 | <b>-1.4442</b>  | cold down vs hot |
| MGAT1     | 5.05E-07    | 1.75E-06    | 0.692109 | <b>-1.44486</b> | cold down vs hot |
| SNN       | 1.09E-08    | 4.45E-08    | 0.691543 | <b>-1.44604</b> | cold down vs hot |
| C10orf11  | 0.00656777  | 0.00890067  | 0.69129  | <b>-1.44657</b> | cold down vs hot |
| SYNE2     | 4.46E-05    | 0.000112752 | 0.691219 | <b>-1.44672</b> | cold down vs hot |
| BTN2A2    | 0.000155124 | 0.000346727 | 0.691014 | <b>-1.44715</b> | cold down vs hot |
| PRKCZ     | 0.00298585  | 0.00459832  | 0.690982 | <b>-1.44722</b> | cold down vs hot |
| RGL1      | 0.000560097 | 0.00108211  | 0.690938 | <b>-1.44731</b> | cold down vs hot |
| HDHD3     | 0.007146    | 0.00956513  | 0.690855 | <b>-1.44748</b> | cold down vs hot |
| HIVEP2    | 5.19E-06    | 1.55E-05    | 0.690678 | <b>-1.44785</b> | cold down vs hot |
| LOC374443 | 4.59E-05    | 0.000115776 | 0.690641 | <b>-1.44793</b> | cold down vs hot |
| RIN3      | 4.99E-06    | 1.49E-05    | 0.690133 | <b>-1.449</b>   | cold down vs hot |
| SYNE1     | 4.20E-06    | 1.27E-05    | 0.690048 | <b>-1.44917</b> | cold down vs hot |
| LITAF     | 5.32E-08    | 2.05E-07    | 0.690032 | <b>-1.44921</b> | cold down vs hot |
| SRGAP3    | 0.00464926  | 0.00667785  | 0.689785 | <b>-1.44973</b> | cold down vs hot |
| CPT1B     | 0.00320317  | 0.00489603  | 0.689352 | <b>-1.45064</b> | cold down vs hot |
| MFSD4     | 0.00235943  | 0.00374951  | 0.689158 | <b>-1.45105</b> | cold down vs hot |
| GNAI2     | 5.07E-12    | 2.69E-11    | 0.688985 | <b>-1.45141</b> | cold down vs hot |
| AGFG2     | 7.73E-09    | 3.23E-08    | 0.688421 | <b>-1.4526</b>  | cold down vs hot |
| OSBPL3    | 0.00222512  | 0.00357436  | 0.688258 | <b>-1.45294</b> | cold down vs hot |

|           |             |             |          |                 |                  |
|-----------|-------------|-------------|----------|-----------------|------------------|
| LOC143188 | 1.50E-05    | 4.14E-05    | 0.687457 | <b>-1.45464</b> | cold down vs hot |
| SH3BGR1   | 3.70E-09    | 1.59E-08    | 0.686697 | <b>-1.45625</b> | cold down vs hot |
| HIVEP3    | 0.000297793 | 0.000615257 | 0.686377 | <b>-1.45693</b> | cold down vs hot |
| LPIN2     | 9.55E-08    | 3.57E-07    | 0.685914 | <b>-1.45791</b> | cold down vs hot |
| ACTN3     | 0.00143559  | 0.00245342  | 0.685727 | <b>-1.45831</b> | cold down vs hot |
| MAT2B     | 1.75E-09    | 7.73E-09    | 0.684892 | <b>-1.46008</b> | cold down vs hot |
| FUT1      | 0.00181254  | 0.00299717  | 0.683745 | <b>-1.46253</b> | cold down vs hot |
| HEXDC     | 5.22E-05    | 0.000130311 | 0.683662 | <b>-1.46271</b> | cold down vs hot |
| CATSPER3  | 0.000641663 | 0.00121813  | 0.683087 | <b>-1.46394</b> | cold down vs hot |
| CTRL      | 0.00118579  | 0.00208156  | 0.682804 | <b>-1.46455</b> | cold down vs hot |
| CPAMD8    | 0.00617042  | 0.0084234   | 0.682751 | <b>-1.46466</b> | cold down vs hot |
| SIPA1     | 3.96E-08    | 1.54E-07    | 0.682619 | <b>-1.46495</b> | cold down vs hot |
| RUNDC3B   | 0.00436508  | 0.00632957  | 0.682452 | <b>-1.46531</b> | cold down vs hot |
| AGBL2     | 0.00568536  | 0.00786827  | 0.682368 | <b>-1.46548</b> | cold down vs hot |
| HDAC7     | 1.80E-08    | 7.26E-08    | 0.682288 | <b>-1.46566</b> | cold down vs hot |
| C19orf66  | 5.27E-07    | 1.82E-06    | 0.68205  | <b>-1.46617</b> | cold down vs hot |
| SOX13     | 0.00101786  | 0.00182707  | 0.680828 | <b>-1.4688</b>  | cold down vs hot |
| DKFZP586I | 4.44E-05    | 0.000112384 | 0.680641 | <b>-1.4692</b>  | cold down vs hot |
| ARRDC1    | 3.73E-08    | 1.46E-07    | 0.680428 | <b>-1.46966</b> | cold down vs hot |
| C1orf126  | 0.00472994  | 0.00677287  | 0.680404 | <b>-1.46972</b> | cold down vs hot |
| FTHL3     | 3.40E-07    | 1.19E-06    | 0.680314 | <b>-1.46991</b> | cold down vs hot |
| FTH1      | 1.71E-07    | 6.26E-07    | 0.680303 | <b>-1.46993</b> | cold down vs hot |
| FLJ11235  | 0.00665344  | 0.00899996  | 0.68018  | <b>-1.4702</b>  | cold down vs hot |
| XRN1      | 7.31E-06    | 2.12E-05    | 0.67998  | <b>-1.47063</b> | cold down vs hot |
| MYLK      | 0.0032152   | 0.00490867  | 0.679761 | <b>-1.47111</b> | cold down vs hot |
| ACBD4     | 2.74E-05    | 7.20E-05    | 0.679615 | <b>-1.47142</b> | cold down vs hot |
| RGS14     | 1.24E-05    | 3.48E-05    | 0.679563 | <b>-1.47153</b> | cold down vs hot |
| RIMBP3C   | 0.00585305  | 0.00806043  | 0.679315 | <b>-1.47207</b> | cold down vs hot |
| REBP      | 0.00109964  | 0.00195718  | 0.67919  | <b>-1.47234</b> | cold down vs hot |
| TMC6      | 0.0061579   | 0.00841508  | 0.67827  | <b>-1.47434</b> | cold down vs hot |
| ASAP3     | 0.00144722  | 0.00247201  | 0.67783  | <b>-1.4753</b>  | cold down vs hot |
| TBC1D8    | 0.000138397 | 0.000313685 | 0.677751 | <b>-1.47547</b> | cold down vs hot |
| PBX3      | 2.52E-05    | 6.67E-05    | 0.677441 | <b>-1.47614</b> | cold down vs hot |
| ZBTB46    | 0.0030782   | 0.00472271  | 0.677231 | <b>-1.4766</b>  | cold down vs hot |
| JUNB      | 0.000146247 | 0.00032948  | 0.677167 | <b>-1.47674</b> | cold down vs hot |
| ZNF438    | 2.23E-06    | 7.04E-06    | 0.677095 | <b>-1.4769</b>  | cold down vs hot |
| TBC1D2B   | 1.65E-08    | 6.69E-08    | 0.676616 | <b>-1.47794</b> | cold down vs hot |
| NCOA7     | 1.80E-05    | 4.89E-05    | 0.676367 | <b>-1.47849</b> | cold down vs hot |
| MOV10     | 1.65E-11    | 8.52E-11    | 0.675373 | <b>-1.48066</b> | cold down vs hot |
| FAM13AOS  | 0.00471692  | 0.00675719  | 0.675164 | <b>-1.48112</b> | cold down vs hot |
| LPAR2     | 0.00166729  | 0.0027895   | 0.674797 | <b>-1.48193</b> | cold down vs hot |
| CECR6     | 0.00106403  | 0.0018995   | 0.674103 | <b>-1.48345</b> | cold down vs hot |
| MAF       | 6.95E-06    | 2.03E-05    | 0.673864 | <b>-1.48398</b> | cold down vs hot |
| ZNF469    | 0.00484285  | 0.00690878  | 0.673803 | <b>-1.48411</b> | cold down vs hot |
| B4GALT1   | 3.98E-08    | 1.55E-07    | 0.673764 | <b>-1.4842</b>  | cold down vs hot |
| SIPA1L1   | 2.21E-05    | 5.93E-05    | 0.673389 | <b>-1.48502</b> | cold down vs hot |
| TJP2      | 0.000363168 | 0.000734513 | 0.672141 | <b>-1.48778</b> | cold down vs hot |
| CRLF3     | 2.56E-08    | 1.01E-07    | 0.672052 | <b>-1.48798</b> | cold down vs hot |
| FAM124B   | 0.0010532   | 0.00188222  | 0.671502 | <b>-1.4892</b>  | cold down vs hot |
| CIB1      | 7.92E-09    | 3.30E-08    | 0.671276 | <b>-1.4897</b>  | cold down vs hot |
| ZRSR2     | 1.83E-11    | 9.41E-11    | 0.671256 | <b>-1.48974</b> | cold down vs hot |
| UBXN11    | 1.06E-06    | 3.51E-06    | 0.670873 | <b>-1.4906</b>  | cold down vs hot |
| COL15A1   | 0.00373789  | 0.00556351  | 0.670741 | <b>-1.49089</b> | cold down vs hot |
| VASH2     | 0.00593986  | 0.00816332  | 0.67053  | <b>-1.49136</b> | cold down vs hot |
| CCDC81    | 0.00497668  | 0.00705894  | 0.670261 | <b>-1.49196</b> | cold down vs hot |
| TNFRSF14  | 0.00110868  | 0.00196913  | 0.670064 | <b>-1.4924</b>  | cold down vs hot |
| KCTD12    | 0.00042595  | 0.000849904 | 0.66993  | <b>-1.49269</b> | cold down vs hot |
| ARHGAP26  | 2.43E-06    | 7.64E-06    | 0.669903 | <b>-1.49275</b> | cold down vs hot |
| PNPLA7    | 0.00337041  | 0.0050991   | 0.669639 | <b>-1.49334</b> | cold down vs hot |
| GRB2      | 1.79E-25    | 1.62E-24    | 0.669519 | <b>-1.49361</b> | cold down vs hot |
| TMSB10    | 1.14E-08    | 4.66E-08    | 0.669383 | <b>-1.49391</b> | cold down vs hot |
| PDE5A     | 0.00134605  | 0.00232289  | 0.669368 | <b>-1.49395</b> | cold down vs hot |
| GALNT12   | 0.00289488  | 0.00447723  | 0.669338 | <b>-1.49401</b> | cold down vs hot |
| MBD2      | 1.81E-13    | 1.02E-12    | 0.669232 | <b>-1.49425</b> | cold down vs hot |
| CREG1     | 1.90E-06    | 6.08E-06    | 0.669187 | <b>-1.49435</b> | cold down vs hot |
| TGFBR2    | 3.82E-05    | 9.78E-05    | 0.668479 | <b>-1.49593</b> | cold down vs hot |
| MARCH2    | 2.36E-08    | 9.37E-08    | 0.668171 | <b>-1.49662</b> | cold down vs hot |
| PRR13     | 5.95E-14    | 3.44E-13    | 0.667853 | <b>-1.49733</b> | cold down vs hot |
| ELTD1     | 0.00158628  | 0.00267316  | 0.667296 | <b>-1.49859</b> | cold down vs hot |
| FOXD4L6   | 0.00434644  | 0.00630535  | 0.667003 | <b>-1.49924</b> | cold down vs hot |
| DLG3      | 0.00134518  | 0.00232201  | 0.666815 | <b>-1.49967</b> | cold down vs hot |
| PLCL1     | 0.00753954  | 0.00997731  | 0.666803 | <b>-1.49969</b> | cold down vs hot |
| LOC100128 | 0.00447909  | 0.00646617  | 0.666629 | <b>-1.50009</b> | cold down vs hot |
| ARRDC2    | 1.18E-08    | 4.82E-08    | 0.666086 | <b>-1.50131</b> | cold down vs hot |
| PPP1R3G   | 0.00315852  | 0.00483458  | 0.666004 | <b>-1.50149</b> | cold down vs hot |
| CA2       | 0.00406606  | 0.00596221  | 0.665224 | <b>-1.50325</b> | cold down vs hot |
| C21orf91  | 0.00556769  | 0.0077283   | 0.665145 | <b>-1.50343</b> | cold down vs hot |

|           |             |             |          |                 |                  |
|-----------|-------------|-------------|----------|-----------------|------------------|
| ANUBL1    | 3.20E-05    | 8.29E-05    | 0.664831 | <b>-1.50414</b> | cold down vs hot |
| DUSP10    | 0.00413078  | 0.00604218  | 0.664694 | <b>-1.50445</b> | cold down vs hot |
| RHEBL1    | 1.15E-06    | 3.79E-06    | 0.664471 | <b>-1.50496</b> | cold down vs hot |
| MICAL1    | 0.000916101 | 0.00166548  | 0.664085 | <b>-1.50583</b> | cold down vs hot |
| MICALL2   | 0.00660102  | 0.00894202  | 0.66361  | <b>-1.50691</b> | cold down vs hot |
| SPAG1     | 0.00135801  | 0.00233982  | 0.663565 | <b>-1.50701</b> | cold down vs hot |
| TREX1     | 2.14E-06    | 6.79E-06    | 0.663534 | <b>-1.50708</b> | cold down vs hot |
| GRN       | 6.09E-07    | 2.09E-06    | 0.662976 | <b>-1.50835</b> | cold down vs hot |
| CCDC28A   | 2.33E-12    | 1.26E-11    | 0.662971 | <b>-1.50836</b> | cold down vs hot |
| SLC25A35  | 7.15E-07    | 2.43E-06    | 0.662864 | <b>-1.50861</b> | cold down vs hot |
| PCGF5     | 7.35E-07    | 2.49E-06    | 0.662819 | <b>-1.50871</b> | cold down vs hot |
| ST6GAL1   | 0.000119837 | 0.000276569 | 0.662645 | <b>-1.5091</b>  | cold down vs hot |
| EPAS1     | 2.89E-07    | 1.03E-06    | 0.662484 | <b>-1.50947</b> | cold down vs hot |
| LOC100134 | 0.00021771  | 0.000465417 | 0.662187 | <b>-1.51015</b> | cold down vs hot |
| PSAP      | 1.76E-08    | 7.12E-08    | 0.662096 | <b>-1.51035</b> | cold down vs hot |
| NECAP2    | 5.54E-21    | 4.27E-20    | 0.661901 | <b>-1.5108</b>  | cold down vs hot |
| GPCPD1    | 3.19E-05    | 8.26E-05    | 0.661613 | <b>-1.51146</b> | cold down vs hot |
| NHSL2     | 0.00403015  | 0.00591887  | 0.661541 | <b>-1.51162</b> | cold down vs hot |
| BCL6      | 3.14E-08    | 1.23E-07    | 0.660899 | <b>-1.51309</b> | cold down vs hot |
| MOBK2A    | 1.38E-11    | 7.17E-11    | 0.660548 | <b>-1.51389</b> | cold down vs hot |
| PPM1K     | 0.000481744 | 0.000947329 | 0.660369 | <b>-1.51431</b> | cold down vs hot |
| STOM      | 5.12E-06    | 1.53E-05    | 0.660343 | <b>-1.51437</b> | cold down vs hot |
| UBE2J1    | 2.10E-10    | 1.01E-09    | 0.659815 | <b>-1.51558</b> | cold down vs hot |
| ABLIM3    | 0.0043969   | 0.00636592  | 0.659704 | <b>-1.51583</b> | cold down vs hot |
| CD34      | 1.35E-05    | 3.75E-05    | 0.658508 | <b>-1.51859</b> | cold down vs hot |
| ALDH3B1   | 0.000220037 | 0.000468856 | 0.65849  | <b>-1.51862</b> | cold down vs hot |
| VASN      | 0.00211023  | 0.00341841  | 0.658169 | <b>-1.51937</b> | cold down vs hot |
| TIMP1     | 0.00121421  | 0.00212574  | 0.65795  | <b>-1.51987</b> | cold down vs hot |
| EXOC3L    | 9.37E-05    | 0.000221    | 0.657903 | <b>-1.51998</b> | cold down vs hot |
| CNOT6L    | 4.30E-09    | 1.84E-08    | 0.657794 | <b>-1.52023</b> | cold down vs hot |
| PQLC3     | 9.80E-09    | 4.05E-08    | 0.657775 | <b>-1.52028</b> | cold down vs hot |
| RORA      | 0.00165898  | 0.00277877  | 0.657646 | <b>-1.52057</b> | cold down vs hot |
| KIAA1949  | 1.35E-07    | 4.98E-07    | 0.657599 | <b>-1.52068</b> | cold down vs hot |
| SH3BP1    | 7.35E-06    | 2.13E-05    | 0.657357 | <b>-1.52124</b> | cold down vs hot |
| ARHGEF15  | 5.99E-05    | 0.000147503 | 0.657342 | <b>-1.52128</b> | cold down vs hot |
| TPST2     | 3.35E-09    | 1.45E-08    | 0.657046 | <b>-1.52196</b> | cold down vs hot |
| EGLN3     | 0.00119502  | 0.00209551  | 0.656841 | <b>-1.52244</b> | cold down vs hot |
| ADA       | 6.02E-06    | 1.77E-05    | 0.656753 | <b>-1.52264</b> | cold down vs hot |
| LOC339524 | 0.000707397 | 0.00132785  | 0.65649  | <b>-1.52325</b> | cold down vs hot |
| POLD4     | 1.79E-08    | 7.22E-08    | 0.656469 | <b>-1.5233</b>  | cold down vs hot |
| TIE1      | 0.0012841   | 0.00223015  | 0.656468 | <b>-1.5233</b>  | cold down vs hot |
| CTSL1     | 0.000791257 | 0.00146811  | 0.656252 | <b>-1.5238</b>  | cold down vs hot |
| MIF4GD    | 3.54E-09    | 1.53E-08    | 0.655774 | <b>-1.52492</b> | cold down vs hot |
| GALR2     | 0.00158246  | 0.00266809  | 0.655765 | <b>-1.52494</b> | cold down vs hot |
| TAL1      | 0.000872782 | 0.00159875  | 0.655463 | <b>-1.52564</b> | cold down vs hot |
| LGALS3    | 0.00274175  | 0.00426771  | 0.655283 | <b>-1.52606</b> | cold down vs hot |
| LOC389333 | 0.000946884 | 0.00171476  | 0.65519  | <b>-1.52627</b> | cold down vs hot |
| FAM70B    | 0.00434963  | 0.00630858  | 0.654472 | <b>-1.52795</b> | cold down vs hot |
| NAT1      | 1.91E-05    | 5.17E-05    | 0.653288 | <b>-1.53072</b> | cold down vs hot |
| TXNDC11   | 4.68E-18    | 3.28E-17    | 0.653068 | <b>-1.53123</b> | cold down vs hot |
| SYN1      | 0.00110778  | 0.00196844  | 0.652994 | <b>-1.53141</b> | cold down vs hot |
| N4BP3     | 0.00538399  | 0.00752613  | 0.652818 | <b>-1.53182</b> | cold down vs hot |
| FAM111A   | 5.32E-06    | 1.58E-05    | 0.65203  | <b>-1.53367</b> | cold down vs hot |
| C14orf159 | 6.12E-10    | 2.81E-09    | 0.65195  | <b>-1.53386</b> | cold down vs hot |
| DTNB      | 5.02E-07    | 1.74E-06    | 0.651762 | <b>-1.5343</b>  | cold down vs hot |
| C17orf91  | 1.31E-05    | 3.66E-05    | 0.651271 | <b>-1.53546</b> | cold down vs hot |
| TSPAN18   | 0.000502776 | 0.000982645 | 0.650292 | <b>-1.53777</b> | cold down vs hot |
| YPEL3     | 6.82E-09    | 2.87E-08    | 0.649982 | <b>-1.5385</b>  | cold down vs hot |
| UBASH3B   | 0.000367177 | 0.000741473 | 0.649176 | <b>-1.54041</b> | cold down vs hot |
| ACADS     | 0.000164385 | 0.000364392 | 0.649037 | <b>-1.54075</b> | cold down vs hot |
| ZNF267    | 6.01E-07    | 2.06E-06    | 0.648494 | <b>-1.54203</b> | cold down vs hot |
| MFSD6     | 7.50E-05    | 0.000181004 | 0.647759 | <b>-1.54378</b> | cold down vs hot |
| CACNA1A   | 0.00716205  | 0.00958072  | 0.647647 | <b>-1.54405</b> | cold down vs hot |
| RELT      | 9.85E-08    | 3.68E-07    | 0.647644 | <b>-1.54406</b> | cold down vs hot |
| RNF19B    | 4.86E-10    | 2.26E-09    | 0.647428 | <b>-1.54457</b> | cold down vs hot |
| IFNAR2    | 1.28E-09    | 5.73E-09    | 0.647426 | <b>-1.54458</b> | cold down vs hot |
| LIMS2     | 0.00395741  | 0.00583941  | 0.647021 | <b>-1.54554</b> | cold down vs hot |
| NANOS1    | 0.000788445 | 0.00146425  | 0.645217 | <b>-1.54987</b> | cold down vs hot |
| C2orf48   | 0.00674462  | 0.00911574  | 0.645001 | <b>-1.55038</b> | cold down vs hot |
| C13orf31  | 1.85E-07    | 6.74E-07    | 0.644912 | <b>-1.5506</b>  | cold down vs hot |
| FLJ35776  | 3.05E-05    | 7.94E-05    | 0.644739 | <b>-1.55102</b> | cold down vs hot |
| CMIP      | 2.25E-09    | 9.84E-09    | 0.644685 | <b>-1.55114</b> | cold down vs hot |
| CAMK1     | 5.95E-05    | 0.000146627 | 0.644012 | <b>-1.55277</b> | cold down vs hot |
| NRIP2     | 8.59E-06    | 2.48E-05    | 0.643848 | <b>-1.55316</b> | cold down vs hot |
| IFNGR1    | 2.06E-09    | 9.05E-09    | 0.643396 | <b>-1.55425</b> | cold down vs hot |
| CYP27A1   | 9.82E-05    | 0.000230542 | 0.642673 | <b>-1.556</b>   | cold down vs hot |
| ERG       | 0.000135925 | 0.000308997 | 0.642203 | <b>-1.55714</b> | cold down vs hot |

|           |             |             |          |                 |                  |
|-----------|-------------|-------------|----------|-----------------|------------------|
| ZNFX1     | 4.33E-13    | 2.41E-12    | 0.642199 | <b>-1.55715</b> | cold down vs hot |
| FAM23A    | 0.00180533  | 0.00298676  | 0.641809 | <b>-1.5581</b>  | cold down vs hot |
| STARD8    | 0.000142399 | 0.000321811 | 0.641089 | <b>-1.55985</b> | cold down vs hot |
| ABTB1     | 4.09E-09    | 1.76E-08    | 0.640984 | <b>-1.5601</b>  | cold down vs hot |
| SLC24A6   | 1.53E-11    | 7.93E-11    | 0.640942 | <b>-1.5602</b>  | cold down vs hot |
| PTPN18    | 1.67E-11    | 8.63E-11    | 0.640727 | <b>-1.56073</b> | cold down vs hot |
| PALMD     | 0.00322267  | 0.00491439  | 0.640651 | <b>-1.56091</b> | cold down vs hot |
| CYBRD1    | 0.00253705  | 0.00398423  | 0.639836 | <b>-1.5629</b>  | cold down vs hot |
| GLCC1     | 0.000163252 | 0.000362411 | 0.639809 | <b>-1.56297</b> | cold down vs hot |
| CHST7     | 0.000636626 | 0.00121032  | 0.639516 | <b>-1.56368</b> | cold down vs hot |
| MYD88     | 3.13E-15    | 1.92E-14    | 0.639515 | <b>-1.56369</b> | cold down vs hot |
| RAB27A    | 0.000230677 | 0.000488658 | 0.639512 | <b>-1.56369</b> | cold down vs hot |
| JDP2      | 2.43E-07    | 8.70E-07    | 0.639065 | <b>-1.56479</b> | cold down vs hot |
| ADAMTS14  | 0.00709909  | 0.00950819  | 0.639026 | <b>-1.56488</b> | cold down vs hot |
| SOX17     | 0.00014853  | 0.000333933 | 0.638913 | <b>-1.56516</b> | cold down vs hot |
| ALDH5A1   | 0.00504394  | 0.00713175  | 0.638446 | <b>-1.5663</b>  | cold down vs hot |
| PLEKHO2   | 1.98E-10    | 9.48E-10    | 0.638114 | <b>-1.56712</b> | cold down vs hot |
| MGLL      | 0.00180945  | 0.00299283  | 0.637688 | <b>-1.56817</b> | cold down vs hot |
| DAPK1     | 0.00025032  | 0.000526339 | 0.637464 | <b>-1.56872</b> | cold down vs hot |
| PFKFB1    | 0.000124393 | 0.000285769 | 0.636943 | <b>-1.57</b>    | cold down vs hot |
| ADPRH     | 1.07E-06    | 3.54E-06    | 0.636934 | <b>-1.57002</b> | cold down vs hot |
| CORO2A    | 0.00223336  | 0.00358407  | 0.636846 | <b>-1.57024</b> | cold down vs hot |
| RAB11FIP4 | 0.000467855 | 0.000924194 | 0.636551 | <b>-1.57097</b> | cold down vs hot |
| COL6A3    | 0.00240359  | 0.0038104   | 0.636413 | <b>-1.57131</b> | cold down vs hot |
| GPX1      | 1.18E-06    | 3.88E-06    | 0.636073 | <b>-1.57215</b> | cold down vs hot |
| NTRK1     | 0.0072507   | 0.0096676   | 0.636006 | <b>-1.57231</b> | cold down vs hot |
| CHST11    | 6.87E-06    | 2.00E-05    | 0.6359   | <b>-1.57257</b> | cold down vs hot |
| CYP4V2    | 2.24E-05    | 6.00E-05    | 0.635684 | <b>-1.57311</b> | cold down vs hot |
| CTSD      | 2.61E-05    | 6.91E-05    | 0.635574 | <b>-1.57338</b> | cold down vs hot |
| CALCRL    | 0.00075477  | 0.00140707  | 0.635366 | <b>-1.5739</b>  | cold down vs hot |
| PML       | 8.11E-13    | 4.47E-12    | 0.635142 | <b>-1.57445</b> | cold down vs hot |
| SCARNA9   | 0.000292199 | 0.00060504  | 0.635143 | <b>-1.57445</b> | cold down vs hot |
| UBE2E2    | 7.72E-05    | 0.000185489 | 0.635099 | <b>-1.57456</b> | cold down vs hot |
| C17orf62  | 4.63E-15    | 2.81E-14    | 0.634936 | <b>-1.57496</b> | cold down vs hot |
| C6orf115  | 5.59E-10    | 2.58E-09    | 0.634612 | <b>-1.57577</b> | cold down vs hot |
| LRRC8C    | 3.15E-07    | 1.11E-06    | 0.633989 | <b>-1.57731</b> | cold down vs hot |
| SUSD1     | 0.000392672 | 0.000788808 | 0.633989 | <b>-1.57732</b> | cold down vs hot |
| TNFRSF11A | 0.00146719  | 0.0024984   | 0.633576 | <b>-1.57834</b> | cold down vs hot |
| CACNA1C   | 0.00412769  | 0.00604037  | 0.633527 | <b>-1.57847</b> | cold down vs hot |
| LRRC70    | 0.000198505 | 0.000428716 | 0.633102 | <b>-1.57952</b> | cold down vs hot |
| NCRNA001  | 6.22E-06    | 1.82E-05    | 0.633092 | <b>-1.57955</b> | cold down vs hot |
| GPR155    | 0.00662865  | 0.00897386  | 0.632489 | <b>-1.58105</b> | cold down vs hot |
| HSD3B7    | 0.000125433 | 0.000287955 | 0.632195 | <b>-1.58179</b> | cold down vs hot |
| LGALS3BP  | 2.32E-05    | 6.20E-05    | 0.631968 | <b>-1.58236</b> | cold down vs hot |
| KLF1      | 0.00296589  | 0.00457081  | 0.631956 | <b>-1.58239</b> | cold down vs hot |
| MARCH3    | 0.000532123 | 0.00103486  | 0.631948 | <b>-1.58241</b> | cold down vs hot |
| SSPN      | 0.00355425  | 0.00533274  | 0.63189  | <b>-1.58255</b> | cold down vs hot |
| GSTK1     | 1.21E-13    | 6.91E-13    | 0.631131 | <b>-1.58446</b> | cold down vs hot |
| CASP8     | 1.16E-09    | 5.20E-09    | 0.62999  | <b>-1.58733</b> | cold down vs hot |
| TDRD10    | 0.00742811  | 0.00986585  | 0.62964  | <b>-1.58821</b> | cold down vs hot |
| SFTA1P    | 0.00332406  | 0.00503715  | 0.629444 | <b>-1.5887</b>  | cold down vs hot |
| SLC25A45  | 6.64E-08    | 2.54E-07    | 0.629092 | <b>-1.58959</b> | cold down vs hot |
| STAT5A    | 2.34E-07    | 8.37E-07    | 0.629094 | <b>-1.58959</b> | cold down vs hot |
| RAB4B     | 9.18E-11    | 4.49E-10    | 0.629072 | <b>-1.58964</b> | cold down vs hot |
| FAM55C    | 2.65E-06    | 8.28E-06    | 0.628923 | <b>-1.59002</b> | cold down vs hot |
| ATF5      | 1.31E-10    | 6.38E-10    | 0.628441 | <b>-1.59124</b> | cold down vs hot |
| SLC25A28  | 2.77E-16    | 1.80E-15    | 0.628231 | <b>-1.59177</b> | cold down vs hot |
| ACTA2     | 4.97E-05    | 0.000124479 | 0.628145 | <b>-1.59199</b> | cold down vs hot |
| IFITM2    | 0.000123629 | 0.000284414 | 0.628114 | <b>-1.59207</b> | cold down vs hot |
| SHE       | 0.000785968 | 0.00146032  | 0.627399 | <b>-1.59388</b> | cold down vs hot |
| HERPUD1   | 2.51E-12    | 1.35E-11    | 0.627328 | <b>-1.59406</b> | cold down vs hot |
| KSR1      | 1.02E-06    | 3.38E-06    | 0.627296 | <b>-1.59414</b> | cold down vs hot |
| HECA      | 6.79E-11    | 3.36E-10    | 0.627141 | <b>-1.59454</b> | cold down vs hot |
| BCL2L11   | 1.79E-07    | 6.53E-07    | 0.627085 | <b>-1.59468</b> | cold down vs hot |
| C4orf34   | 1.30E-09    | 5.84E-09    | 0.626929 | <b>-1.59508</b> | cold down vs hot |
| PROCA1    | 5.79E-07    | 1.99E-06    | 0.626303 | <b>-1.59667</b> | cold down vs hot |
| TNFSF12   | 3.37E-07    | 1.19E-06    | 0.625741 | <b>-1.5981</b>  | cold down vs hot |
| CDH5      | 4.91E-07    | 1.70E-06    | 0.625442 | <b>-1.59887</b> | cold down vs hot |
| PARP11    | 9.33E-07    | 3.12E-06    | 0.625045 | <b>-1.59988</b> | cold down vs hot |
| CD302     | 4.55E-05    | 0.00011501  | 0.62435  | <b>-1.60166</b> | cold down vs hot |
| ADRBK1    | 3.92E-14    | 2.28E-13    | 0.62426  | <b>-1.6019</b>  | cold down vs hot |
| RILP      | 1.08E-07    | 4.01E-07    | 0.624084 | <b>-1.60235</b> | cold down vs hot |
| SIRPB1    | 1.97E-05    | 5.32E-05    | 0.623842 | <b>-1.60297</b> | cold down vs hot |
| MMRN2     | 8.18E-07    | 2.76E-06    | 0.623755 | <b>-1.60319</b> | cold down vs hot |
| LOC100133 | 0.000335292 | 0.000685356 | 0.623338 | <b>-1.60427</b> | cold down vs hot |
| FUT4      | 2.48E-07    | 8.86E-07    | 0.623163 | <b>-1.60472</b> | cold down vs hot |
| IDH2      | 1.52E-08    | 6.17E-08    | 0.623154 | <b>-1.60474</b> | cold down vs hot |

|           |             |             |          |                 |                  |
|-----------|-------------|-------------|----------|-----------------|------------------|
| MLLT3     | 0.000160381 | 0.000356889 | 0.622538 | <b>-1.60633</b> | cold down vs hot |
| STAT2     | 1.33E-11    | 6.90E-11    | 0.622044 | <b>-1.6076</b>  | cold down vs hot |
| KIAA0513  | 3.97E-09    | 1.71E-08    | 0.622011 | <b>-1.60769</b> | cold down vs hot |
| PNRC1     | 1.10E-13    | 6.29E-13    | 0.621384 | <b>-1.60931</b> | cold down vs hot |
| DENND1B   | 0.00293704  | 0.00453277  | 0.621298 | <b>-1.60953</b> | cold down vs hot |
| RUNX1     | 3.35E-05    | 8.63E-05    | 0.620268 | <b>-1.61221</b> | cold down vs hot |
| PLEKHA2   | 1.29E-06    | 4.22E-06    | 0.619442 | <b>-1.61436</b> | cold down vs hot |
| SH3BGL3   | 1.45E-07    | 5.34E-07    | 0.619213 | <b>-1.61495</b> | cold down vs hot |
| BGN       | 0.000438737 | 0.000872217 | 0.619083 | <b>-1.61529</b> | cold down vs hot |
| ARID3B    | 2.05E-07    | 7.41E-07    | 0.61883  | <b>-1.61595</b> | cold down vs hot |
| BLOC1S1   | 2.60E-05    | 6.87E-05    | 0.618579 | <b>-1.61661</b> | cold down vs hot |
| ZNF185    | 1.59E-05    | 4.36E-05    | 0.618505 | <b>-1.6168</b>  | cold down vs hot |
| PPP1R2P1  | 5.71E-06    | 1.69E-05    | 0.618178 | <b>-1.61766</b> | cold down vs hot |
| IGSF22    | 0.00014767  | 0.000332228 | 0.617938 | <b>-1.61829</b> | cold down vs hot |
| FZD10     | 0.00499527  | 0.00707519  | 0.617618 | <b>-1.61912</b> | cold down vs hot |
| STX1B     | 0.000675809 | 0.00127516  | 0.616924 | <b>-1.62094</b> | cold down vs hot |
| MDGA1     | 0.00337186  | 0.00510012  | 0.616882 | <b>-1.62105</b> | cold down vs hot |
| MYCT1     | 3.39E-05    | 8.72E-05    | 0.616508 | <b>-1.62204</b> | cold down vs hot |
| KIAA1107  | 0.00175565  | 0.00291342  | 0.616312 | <b>-1.62256</b> | cold down vs hot |
| STEAP4    | 0.000529996 | 0.00103103  | 0.61625  | <b>-1.62272</b> | cold down vs hot |
| SLFN12    | 0.000227225 | 0.000482127 | 0.616092 | <b>-1.62313</b> | cold down vs hot |
| KIAA1683  | 0.00253186  | 0.00397858  | 0.615956 | <b>-1.62349</b> | cold down vs hot |
| GATA6     | 0.00253977  | 0.00398658  | 0.615922 | <b>-1.62358</b> | cold down vs hot |
| LOC80054  | 0.000924691 | 0.0016797   | 0.615448 | <b>-1.62483</b> | cold down vs hot |
| AQPEP     | 0.004368    | 0.00633241  | 0.615067 | <b>-1.62584</b> | cold down vs hot |
| NINJ1     | 2.06E-07    | 7.44E-07    | 0.614179 | <b>-1.62819</b> | cold down vs hot |
| C20orf202 | 1.16E-05    | 3.28E-05    | 0.614134 | <b>-1.62831</b> | cold down vs hot |
| S1PR3     | 0.000452351 | 0.000896552 | 0.613921 | <b>-1.62888</b> | cold down vs hot |
| SERPINI1  | 0.00315832  | 0.00483458  | 0.613688 | <b>-1.62949</b> | cold down vs hot |
| IL6R      | 0.000147273 | 0.000331563 | 0.613284 | <b>-1.63057</b> | cold down vs hot |
| ACP2      | 3.29E-18    | 2.32E-17    | 0.612141 | <b>-1.63361</b> | cold down vs hot |
| ATOH8     | 0.00344893  | 0.00520102  | 0.611524 | <b>-1.63526</b> | cold down vs hot |
| DSE       | 6.36E-09    | 2.69E-08    | 0.611365 | <b>-1.63569</b> | cold down vs hot |
| APOBEC3C  | 2.14E-07    | 7.72E-07    | 0.610861 | <b>-1.63703</b> | cold down vs hot |
| GABRE     | 0.00638418  | 0.00868614  | 0.61086  | <b>-1.63704</b> | cold down vs hot |
| LOC643008 | 0.00219562  | 0.00353568  | 0.610775 | <b>-1.63726</b> | cold down vs hot |
| TMCO4     | 2.62E-06    | 8.20E-06    | 0.610624 | <b>-1.63767</b> | cold down vs hot |
| RGS19     | 1.73E-11    | 8.93E-11    | 0.610506 | <b>-1.63798</b> | cold down vs hot |
| TMEM173   | 9.75E-10    | 4.41E-09    | 0.610506 | <b>-1.63799</b> | cold down vs hot |
| MYO15B    | 0.00151897  | 0.00257628  | 0.610174 | <b>-1.63888</b> | cold down vs hot |
| SEPT4     | 0.00119353  | 0.00209346  | 0.610017 | <b>-1.6393</b>  | cold down vs hot |
| FCHSD2    | 1.71E-09    | 7.58E-09    | 0.608824 | <b>-1.64251</b> | cold down vs hot |
| RFFL      | 5.86E-11    | 2.91E-10    | 0.608593 | <b>-1.64313</b> | cold down vs hot |
| TNIP1     | 2.58E-18    | 1.83E-17    | 0.6079   | <b>-1.64501</b> | cold down vs hot |
| TNFRSF6B  | 0.000983626 | 0.00177539  | 0.607698 | <b>-1.64555</b> | cold down vs hot |
| DNAH1     | 1.38E-05    | 3.82E-05    | 0.607627 | <b>-1.64575</b> | cold down vs hot |
| FES       | 0.000180552 | 0.000394246 | 0.607597 | <b>-1.64583</b> | cold down vs hot |
| LYSMD2    | 8.33E-10    | 3.79E-09    | 0.607421 | <b>-1.6463</b>  | cold down vs hot |
| TMEM139   | 0.00250395  | 0.00394173  | 0.607147 | <b>-1.64705</b> | cold down vs hot |
| OLFML2B   | 3.48E-05    | 8.94E-05    | 0.606989 | <b>-1.64748</b> | cold down vs hot |
| AKR1A1    | 2.02E-14    | 1.19E-13    | 0.606682 | <b>-1.64831</b> | cold down vs hot |
| COLEC12   | 0.000987164 | 0.00178079  | 0.606399 | <b>-1.64908</b> | cold down vs hot |
| DKK2      | 0.0052774   | 0.00739296  | 0.606292 | <b>-1.64937</b> | cold down vs hot |
| SCARNA17  | 4.22E-05    | 0.000107218 | 0.606062 | <b>-1.65</b>    | cold down vs hot |
| FOXS1     | 0.000328117 | 0.000671531 | 0.605618 | <b>-1.6512</b>  | cold down vs hot |
| ABCG2     | 0.00149268  | 0.00253755  | 0.605482 | <b>-1.65158</b> | cold down vs hot |
| DPRXP4    | 9.71E-06    | 2.77E-05    | 0.605453 | <b>-1.65166</b> | cold down vs hot |
| HTATIP2   | 0.000313547 | 0.000644338 | 0.605297 | <b>-1.65208</b> | cold down vs hot |
| PRR15     | 0.00446647  | 0.00644937  | 0.605179 | <b>-1.6524</b>  | cold down vs hot |
| A4GALT    | 0.000434205 | 0.000864525 | 0.604373 | <b>-1.65461</b> | cold down vs hot |
| GUCY1B3   | 0.00017617  | 0.000385839 | 0.604076 | <b>-1.65542</b> | cold down vs hot |
| PLSCR1    | 2.21E-08    | 8.78E-08    | 0.603983 | <b>-1.65568</b> | cold down vs hot |
| HDAC9     | 0.00421311  | 0.00614197  | 0.603913 | <b>-1.65587</b> | cold down vs hot |
| ITGAE     | 2.18E-12    | 1.18E-11    | 0.603705 | <b>-1.65644</b> | cold down vs hot |
| MICALCL   | 0.0017181   | 0.00286276  | 0.603678 | <b>-1.65651</b> | cold down vs hot |
| FLT4      | 2.41E-05    | 6.40E-05    | 0.603094 | <b>-1.65812</b> | cold down vs hot |
| FAM110A   | 8.52E-10    | 3.87E-09    | 0.602988 | <b>-1.65841</b> | cold down vs hot |
| PGBD5     | 0.00551994  | 0.00767835  | 0.602927 | <b>-1.65858</b> | cold down vs hot |
| ASB9      | 0.000647914 | 0.00122821  | 0.602518 | <b>-1.6597</b>  | cold down vs hot |
| DACT1     | 0.000932302 | 0.00169211  | 0.602512 | <b>-1.65972</b> | cold down vs hot |
| CLEC14A   | 1.86E-08    | 7.47E-08    | 0.601917 | <b>-1.66136</b> | cold down vs hot |
| SLITRK4   | 0.00548235  | 0.00763093  | 0.601895 | <b>-1.66142</b> | cold down vs hot |
| PRKAG2    | 3.12E-06    | 9.65E-06    | 0.601593 | <b>-1.66225</b> | cold down vs hot |
| SMPDL3A   | 7.99E-08    | 3.03E-07    | 0.601263 | <b>-1.66317</b> | cold down vs hot |
| FRAT1     | 2.61E-09    | 1.14E-08    | 0.601168 | <b>-1.66343</b> | cold down vs hot |
| TMPRSS6   | 0.00128087  | 0.00222632  | 0.60021  | <b>-1.66608</b> | cold down vs hot |
| FITM1     | 0.000107718 | 0.000251356 | 0.600191 | <b>-1.66614</b> | cold down vs hot |

|           |             |             |          |                 |                  |
|-----------|-------------|-------------|----------|-----------------|------------------|
| KCNE3     | 1.70E-06    | 5.48E-06    | 0.600007 | <b>-1.66665</b> | cold down vs hot |
| SLC44A4   | 0.00406139  | 0.00595671  | 0.599664 | <b>-1.6676</b>  | cold down vs hot |
| HNMT      | 1.62E-06    | 5.24E-06    | 0.599543 | <b>-1.66794</b> | cold down vs hot |
| FGD5      | 2.87E-06    | 8.94E-06    | 0.599368 | <b>-1.66843</b> | cold down vs hot |
| NEIL1     | 0.00106065  | 0.00189451  | 0.598878 | <b>-1.66979</b> | cold down vs hot |
| TMEM86A   | 8.77E-09    | 3.64E-08    | 0.59855  | <b>-1.6707</b>  | cold down vs hot |
| NFKBIE    | 6.78E-12    | 3.56E-11    | 0.598338 | <b>-1.67129</b> | cold down vs hot |
| CST3      | 9.05E-10    | 4.10E-09    | 0.598213 | <b>-1.67164</b> | cold down vs hot |
| THY1      | 3.37E-05    | 8.67E-05    | 0.598209 | <b>-1.67166</b> | cold down vs hot |
| VWF       | 1.34E-06    | 4.37E-06    | 0.59809  | <b>-1.67199</b> | cold down vs hot |
| TRAFD1    | 6.40E-24    | 5.47E-23    | 0.597951 | <b>-1.67238</b> | cold down vs hot |
| ZNRF2     | 7.18E-12    | 3.76E-11    | 0.597901 | <b>-1.67252</b> | cold down vs hot |
| MGST2     | 5.82E-05    | 0.000143806 | 0.597901 | <b>-1.67252</b> | cold down vs hot |
| C20orf107 | 7.39E-05    | 0.000178616 | 0.59788  | <b>-1.67258</b> | cold down vs hot |
| CALHM2    | 8.43E-07    | 2.84E-06    | 0.597433 | <b>-1.67383</b> | cold down vs hot |
| MAN1C1    | 2.10E-05    | 5.65E-05    | 0.597431 | <b>-1.67383</b> | cold down vs hot |
| NUB1      | 3.70E-20    | 2.80E-19    | 0.597375 | <b>-1.67399</b> | cold down vs hot |
| SGMS1     | 3.62E-06    | 1.11E-05    | 0.597034 | <b>-1.67495</b> | cold down vs hot |
| C9orf103  | 3.15E-09    | 1.37E-08    | 0.596907 | <b>-1.6753</b>  | cold down vs hot |
| RRAS      | 9.83E-08    | 3.67E-07    | 0.596634 | <b>-1.67607</b> | cold down vs hot |
| LOC100132 | 1.34E-07    | 4.96E-07    | 0.596568 | <b>-1.67625</b> | cold down vs hot |
| P2RX4     | 1.01E-09    | 4.54E-09    | 0.596282 | <b>-1.67706</b> | cold down vs hot |
| IFIT5     | 1.04E-08    | 4.26E-08    | 0.596167 | <b>-1.67738</b> | cold down vs hot |
| ZNF737    | 0.000447728 | 0.000888738 | 0.59592  | <b>-1.67808</b> | cold down vs hot |
| NLRP12    | 0.00102961  | 0.00184562  | 0.595659 | <b>-1.67881</b> | cold down vs hot |
| IGFBP4    | 3.42E-05    | 8.80E-05    | 0.595608 | <b>-1.67896</b> | cold down vs hot |
| NUDT18    | 3.04E-09    | 1.32E-08    | 0.59554  | <b>-1.67915</b> | cold down vs hot |
| FBLN7     | 0.00335815  | 0.0050841   | 0.595365 | <b>-1.67964</b> | cold down vs hot |
| CD93      | 1.90E-07    | 6.91E-07    | 0.595097 | <b>-1.6804</b>  | cold down vs hot |
| PCDHGA9   | 0.00528378  | 0.00739883  | 0.594964 | <b>-1.68077</b> | cold down vs hot |
| RNASE1    | 0.00315339  | 0.00482899  | 0.594862 | <b>-1.68106</b> | cold down vs hot |
| BEX2      | 0.00376781  | 0.00560292  | 0.594864 | <b>-1.68106</b> | cold down vs hot |
| ZFPM2     | 0.00111243  | 0.00197509  | 0.594818 | <b>-1.68119</b> | cold down vs hot |
| SULF2     | 0.000211063 | 0.000453585 | 0.594703 | <b>-1.68151</b> | cold down vs hot |
| LOC645431 | 6.16E-06    | 1.81E-05    | 0.594577 | <b>-1.68187</b> | cold down vs hot |
| CXorf36   | 3.06E-07    | 1.08E-06    | 0.594238 | <b>-1.68283</b> | cold down vs hot |
| PRIC285   | 1.01E-05    | 2.88E-05    | 0.594113 | <b>-1.68318</b> | cold down vs hot |
| LOC284233 | 0.00441351  | 0.00638561  | 0.594077 | <b>-1.68328</b> | cold down vs hot |
| LEPR      | 0.000109936 | 0.000255435 | 0.594028 | <b>-1.68342</b> | cold down vs hot |
| AGXT2L2   | 1.84E-13    | 1.04E-12    | 0.594003 | <b>-1.68349</b> | cold down vs hot |
| DLEC1     | 0.000510402 | 0.000996776 | 0.593613 | <b>-1.6846</b>  | cold down vs hot |
| LOC91450  | 1.38E-05    | 3.83E-05    | 0.593583 | <b>-1.68468</b> | cold down vs hot |
| GPR1      | 0.0061445   | 0.00840032  | 0.593483 | <b>-1.68497</b> | cold down vs hot |
| KLKB1     | 0.00718964  | 0.00960778  | 0.593446 | <b>-1.68507</b> | cold down vs hot |
| RPH3AL    | 0.000126242 | 0.000289103 | 0.59295  | <b>-1.68648</b> | cold down vs hot |
| EPB41     | 5.95E-09    | 2.51E-08    | 0.59293  | <b>-1.68654</b> | cold down vs hot |
| KLF8      | 0.00133714  | 0.00231211  | 0.592365 | <b>-1.68815</b> | cold down vs hot |
| CATSPER1  | 0.00349474  | 0.00526038  | 0.592347 | <b>-1.6882</b>  | cold down vs hot |
| ODZ4      | 0.00181868  | 0.00300581  | 0.592152 | <b>-1.68876</b> | cold down vs hot |
| RASA4     | 5.59E-07    | 1.93E-06    | 0.5918   | <b>-1.68976</b> | cold down vs hot |
| GRRP1     | 2.57E-06    | 8.05E-06    | 0.591734 | <b>-1.68995</b> | cold down vs hot |
| SPAG4     | 0.00187517  | 0.00308278  | 0.591727 | <b>-1.68997</b> | cold down vs hot |
| DLL1      | 0.000116836 | 0.000270503 | 0.591525 | <b>-1.69054</b> | cold down vs hot |
| SLC11A1   | 0.00174973  | 0.00290657  | 0.590499 | <b>-1.69348</b> | cold down vs hot |
| CLEC2D    | 6.03E-11    | 2.98E-10    | 0.590401 | <b>-1.69377</b> | cold down vs hot |
| PHF15     | 1.19E-09    | 5.36E-09    | 0.58978  | <b>-1.69555</b> | cold down vs hot |
| IFITM3    | 8.33E-07    | 2.81E-06    | 0.589419 | <b>-1.69659</b> | cold down vs hot |
| MN1       | 4.91E-05    | 0.000123057 | 0.589321 | <b>-1.69687</b> | cold down vs hot |
| LYPD3     | 0.00218879  | 0.00352904  | 0.589152 | <b>-1.69736</b> | cold down vs hot |
| TES       | 1.07E-05    | 3.04E-05    | 0.589135 | <b>-1.6974</b>  | cold down vs hot |
| LOC149837 | 0.00304019  | 0.00467208  | 0.588754 | <b>-1.6985</b>  | cold down vs hot |
| CTSO      | 7.70E-08    | 2.92E-07    | 0.588723 | <b>-1.69859</b> | cold down vs hot |
| ECM2      | 0.00103902  | 0.00185995  | 0.588622 | <b>-1.69888</b> | cold down vs hot |
| SLC41A2   | 1.41E-05    | 3.90E-05    | 0.588077 | <b>-1.70046</b> | cold down vs hot |
| LY6E      | 0.000194308 | 0.000420582 | 0.587946 | <b>-1.70084</b> | cold down vs hot |
| PTCH2     | 0.000181285 | 0.000395451 | 0.587432 | <b>-1.70232</b> | cold down vs hot |
| KIAA1618  | 4.58E-10    | 2.13E-09    | 0.587045 | <b>-1.70345</b> | cold down vs hot |
| CDRT4     | 1.48E-06    | 4.79E-06    | 0.586654 | <b>-1.70458</b> | cold down vs hot |
| F2RL3     | 0.00077459  | 0.00144113  | 0.585319 | <b>-1.70847</b> | cold down vs hot |
| BOC       | 0.00185299  | 0.00305534  | 0.585273 | <b>-1.70861</b> | cold down vs hot |
| F10       | 0.000216212 | 0.000462669 | 0.585253 | <b>-1.70866</b> | cold down vs hot |
| LACTB     | 1.33E-11    | 6.91E-11    | 0.585084 | <b>-1.70915</b> | cold down vs hot |
| PRKX      | 5.59E-06    | 1.66E-05    | 0.584881 | <b>-1.70975</b> | cold down vs hot |
| NTN4      | 0.00550123  | 0.00765558  | 0.584832 | <b>-1.70989</b> | cold down vs hot |
| MBOAT4    | 4.99E-05    | 0.0001249   | 0.584275 | <b>-1.71152</b> | cold down vs hot |
| C12orf75  | 0.000157377 | 0.000351161 | 0.584235 | <b>-1.71164</b> | cold down vs hot |
| ADM2      | 0.00361481  | 0.00541116  | 0.584201 | <b>-1.71174</b> | cold down vs hot |

|           |             |             |          |                 |                  |
|-----------|-------------|-------------|----------|-----------------|------------------|
| SP100     | 5.04E-12    | 2.67E-11    | 0.584006 | <b>-1.71231</b> | cold down vs hot |
| MYL9      | 0.000107826 | 0.000251427 | 0.583897 | <b>-1.71263</b> | cold down vs hot |
| NPNT      | 0.00017651  | 0.000386326 | 0.583401 | <b>-1.71409</b> | cold down vs hot |
| C2CD4C    | 0.00114055  | 0.00201669  | 0.58327  | <b>-1.71447</b> | cold down vs hot |
| USHBP1    | 3.35E-06    | 1.03E-05    | 0.582614 | <b>-1.7164</b>  | cold down vs hot |
| KCNE1L    | 9.69E-05    | 0.000227783 | 0.582443 | <b>-1.7169</b>  | cold down vs hot |
| JAM2      | 0.000128103 | 0.000292849 | 0.582409 | <b>-1.71701</b> | cold down vs hot |
| PDGFB     | 2.86E-08    | 1.13E-07    | 0.582022 | <b>-1.71815</b> | cold down vs hot |
| C13orf18  | 0.00172111  | 0.00286705  | 0.581996 | <b>-1.71822</b> | cold down vs hot |
| FLJ43663  | 1.63E-07    | 5.97E-07    | 0.581359 | <b>-1.72011</b> | cold down vs hot |
| S100A3    | 0.00321479  | 0.00490867  | 0.580978 | <b>-1.72124</b> | cold down vs hot |
| ABCA7     | 9.24E-06    | 2.65E-05    | 0.580903 | <b>-1.72146</b> | cold down vs hot |
| PMFBP1    | 0.00136653  | 0.00235203  | 0.580846 | <b>-1.72163</b> | cold down vs hot |
| NR5A2     | 8.11E-05    | 0.000194121 | 0.580686 | <b>-1.7221</b>  | cold down vs hot |
| SLC12A7   | 8.01E-05    | 0.000191956 | 0.580601 | <b>-1.72235</b> | cold down vs hot |
| CCL26     | 0.00203648  | 0.00331705  | 0.580417 | <b>-1.7229</b>  | cold down vs hot |
| RIMBP3    | 0.000182077 | 0.000396647 | 0.580237 | <b>-1.72343</b> | cold down vs hot |
| ELL3      | 4.44E-10    | 2.06E-09    | 0.579565 | <b>-1.72543</b> | cold down vs hot |
| MADCAM1   | 0.00155114  | 0.00262274  | 0.579337 | <b>-1.72611</b> | cold down vs hot |
| DOK1      | 3.70E-10    | 1.73E-09    | 0.578987 | <b>-1.72715</b> | cold down vs hot |
| GPIHBP1   | 0.000471997 | 0.000930966 | 0.578864 | <b>-1.72752</b> | cold down vs hot |
| SH2B2     | 4.56E-05    | 0.000115104 | 0.578854 | <b>-1.72755</b> | cold down vs hot |
| IQCA1     | 0.00132294  | 0.00229029  | 0.578302 | <b>-1.7292</b>  | cold down vs hot |
| C6orf132  | 0.000966557 | 0.00174748  | 0.57825  | <b>-1.72936</b> | cold down vs hot |
| FBLN2     | 0.00111384  | 0.00197653  | 0.578096 | <b>-1.72982</b> | cold down vs hot |
| PIK3C2B   | 1.80E-08    | 7.23E-08    | 0.577695 | <b>-1.73102</b> | cold down vs hot |
| TCEA3     | 0.00646178  | 0.00877343  | 0.576609 | <b>-1.73428</b> | cold down vs hot |
| KLHL3     | 1.03E-05    | 2.93E-05    | 0.576542 | <b>-1.73448</b> | cold down vs hot |
| CYYR1     | 5.39E-08    | 2.08E-07    | 0.575784 | <b>-1.73676</b> | cold down vs hot |
| NMUR1     | 0.000749268 | 0.00139961  | 0.575734 | <b>-1.73691</b> | cold down vs hot |
| TMEM140   | 2.11E-11    | 1.08E-10    | 0.575187 | <b>-1.73857</b> | cold down vs hot |
| UNC13A    | 0.00688815  | 0.00927031  | 0.57518  | <b>-1.73859</b> | cold down vs hot |
| FKBP11    | 1.07E-06    | 3.54E-06    | 0.575057 | <b>-1.73896</b> | cold down vs hot |
| C21orf7   | 2.36E-05    | 6.27E-05    | 0.57497  | <b>-1.73922</b> | cold down vs hot |
| C4orf32   | 2.05E-06    | 6.52E-06    | 0.574658 | <b>-1.74017</b> | cold down vs hot |
| F2RL1     | 0.00167954  | 0.0028064   | 0.574575 | <b>-1.74042</b> | cold down vs hot |
| GPR172B   | 0.00123834  | 0.00216102  | 0.574178 | <b>-1.74162</b> | cold down vs hot |
| ZDHHHC2   | 0.0024994   | 0.00393553  | 0.573864 | <b>-1.74257</b> | cold down vs hot |
| CPEB3     | 2.06E-09    | 9.05E-09    | 0.573631 | <b>-1.74328</b> | cold down vs hot |
| C10orf125 | 7.57E-08    | 2.88E-07    | 0.57335  | <b>-1.74413</b> | cold down vs hot |
| GPR97     | 0.00175395  | 0.00291135  | 0.573171 | <b>-1.74468</b> | cold down vs hot |
| PRDX1     | 1.08E-07    | 4.00E-07    | 0.57303  | <b>-1.74511</b> | cold down vs hot |
| KCTD17    | 0.000172869 | 0.000380123 | 0.572519 | <b>-1.74667</b> | cold down vs hot |
| ATP1B1    | 0.000500716 | 0.000980205 | 0.57246  | <b>-1.74685</b> | cold down vs hot |
| OSTF1     | 6.57E-19    | 4.82E-18    | 0.572252 | <b>-1.74748</b> | cold down vs hot |
| KCNK5     | 0.00160645  | 0.00270295  | 0.572239 | <b>-1.74752</b> | cold down vs hot |
| RDH10     | 8.56E-08    | 3.23E-07    | 0.571715 | <b>-1.74912</b> | cold down vs hot |
| ENTPD1    | 3.90E-11    | 1.97E-10    | 0.571681 | <b>-1.74923</b> | cold down vs hot |
| SLC12A8   | 0.000283338 | 0.000589121 | 0.571646 | <b>-1.74933</b> | cold down vs hot |
| TCF4      | 0.000216026 | 0.000462425 | 0.571209 | <b>-1.75067</b> | cold down vs hot |
| NEU4      | 0.00661245  | 0.00895565  | 0.57037  | <b>-1.75325</b> | cold down vs hot |
| FAM3B     | 0.00696564  | 0.00935248  | 0.57021  | <b>-1.75374</b> | cold down vs hot |
| ALPK1     | 6.86E-11    | 3.39E-10    | 0.570203 | <b>-1.75376</b> | cold down vs hot |
| ZNF296    | 5.88E-05    | 0.000145053 | 0.569754 | <b>-1.75514</b> | cold down vs hot |
| ASPHD2    | 7.44E-10    | 3.40E-09    | 0.569386 | <b>-1.75628</b> | cold down vs hot |
| PYGM      | 0.00020969  | 0.000450783 | 0.568752 | <b>-1.75824</b> | cold down vs hot |
| PDE7A     | 1.41E-09    | 6.27E-09    | 0.568643 | <b>-1.75857</b> | cold down vs hot |
| MOBK12C   | 2.16E-21    | 1.69E-20    | 0.568498 | <b>-1.75902</b> | cold down vs hot |
| ANGPTL6   | 2.47E-05    | 6.56E-05    | 0.567907 | <b>-1.76085</b> | cold down vs hot |
| HIC1      | 1.79E-05    | 4.86E-05    | 0.56723  | <b>-1.76295</b> | cold down vs hot |
| KIAA0664P | 0.00291905  | 0.00451248  | 0.567223 | <b>-1.76298</b> | cold down vs hot |
| LOC728855 | 7.04E-05    | 0.000170913 | 0.567053 | <b>-1.7635</b>  | cold down vs hot |
| FLJ45445  | 0.000105508 | 0.000246463 | 0.566741 | <b>-1.76447</b> | cold down vs hot |
| CARD6     | 1.85E-07    | 6.74E-07    | 0.566512 | <b>-1.76519</b> | cold down vs hot |
| KIAA0247  | 7.07E-19    | 5.18E-18    | 0.566405 | <b>-1.76552</b> | cold down vs hot |
| PGR       | 0.00173011  | 0.00287982  | 0.56633  | <b>-1.76576</b> | cold down vs hot |
| LHPP      | 2.04E-09    | 8.98E-09    | 0.566155 | <b>-1.7663</b>  | cold down vs hot |
| GCA       | 3.38E-12    | 1.81E-11    | 0.565905 | <b>-1.76708</b> | cold down vs hot |
| ZNF702P   | 0.00370672  | 0.00552467  | 0.564949 | <b>-1.77007</b> | cold down vs hot |
| EPHX3     | 0.00212715  | 0.00344154  | 0.564905 | <b>-1.77021</b> | cold down vs hot |
| SLC1A7    | 0.000496463 | 0.000973048 | 0.564848 | <b>-1.77039</b> | cold down vs hot |
| HSD17B14  | 0.000269939 | 0.000563417 | 0.564648 | <b>-1.77101</b> | cold down vs hot |
| CCDC3     | 0.000244013 | 0.000514072 | 0.564561 | <b>-1.77129</b> | cold down vs hot |
| CC2D2B    | 0.000223258 | 0.000474791 | 0.564446 | <b>-1.77165</b> | cold down vs hot |
| C14orf72  | 0.00322335  | 0.00491439  | 0.564403 | <b>-1.77178</b> | cold down vs hot |
| CFI       | 0.00596016  | 0.00818947  | 0.564252 | <b>-1.77226</b> | cold down vs hot |
| PRSS36    | 5.97E-11    | 2.96E-10    | 0.564241 | <b>-1.77229</b> | cold down vs hot |

|           |             |             |          |                 |                  |
|-----------|-------------|-------------|----------|-----------------|------------------|
| RHBDL2    | 0.00037904  | 0.000763466 | 0.564167 | <b>-1.77253</b> | cold down vs hot |
| TCEAL7    | 0.000855782 | 0.00157335  | 0.564015 | <b>-1.773</b>   | cold down vs hot |
| C14orf181 | 9.66E-07    | 3.22E-06    | 0.563763 | <b>-1.7738</b>  | cold down vs hot |
| CTSB      | 2.06E-07    | 7.44E-07    | 0.563603 | <b>-1.7743</b>  | cold down vs hot |
| ID2       | 1.61E-07    | 5.92E-07    | 0.563593 | <b>-1.77433</b> | cold down vs hot |
| SDPR      | 0.000219193 | 0.000467669 | 0.563175 | <b>-1.77565</b> | cold down vs hot |
| THEM5     | 0.002515    | 0.00395722  | 0.563133 | <b>-1.77578</b> | cold down vs hot |
| SLCO3A1   | 8.29E-06    | 2.39E-05    | 0.562528 | <b>-1.77769</b> | cold down vs hot |
| EZR       | 3.09E-07    | 1.09E-06    | 0.562498 | <b>-1.77778</b> | cold down vs hot |
| DOCK10    | 1.18E-08    | 4.81E-08    | 0.56227  | <b>-1.77851</b> | cold down vs hot |
| ROR2      | 0.00116504  | 0.00205366  | 0.562261 | <b>-1.77853</b> | cold down vs hot |
| C9orf167  | 2.87E-05    | 7.49E-05    | 0.561757 | <b>-1.78013</b> | cold down vs hot |
| C22orf15  | 0.000176374 | 0.000386157 | 0.561316 | <b>-1.78153</b> | cold down vs hot |
| ANXA6     | 3.66E-10    | 1.72E-09    | 0.561305 | <b>-1.78156</b> | cold down vs hot |
| EMR2      | 1.09E-06    | 3.62E-06    | 0.561288 | <b>-1.78162</b> | cold down vs hot |
| CHN2      | 0.00177148  | 0.00293523  | 0.561238 | <b>-1.78178</b> | cold down vs hot |
| C17orf76  | 3.11E-05    | 8.08E-05    | 0.561093 | <b>-1.78224</b> | cold down vs hot |
| LOC728989 | 0.00186776  | 0.00307578  | 0.560562 | <b>-1.78392</b> | cold down vs hot |
| PRRX2     | 0.00216928  | 0.00350017  | 0.560416 | <b>-1.78439</b> | cold down vs hot |
| GPR21     | 0.000144463 | 0.000325911 | 0.560406 | <b>-1.78442</b> | cold down vs hot |
| FAM50B    | 0.000432217 | 0.00086098  | 0.559255 | <b>-1.78809</b> | cold down vs hot |
| KIRREL3   | 0.00551044  | 0.00766677  | 0.558855 | <b>-1.78937</b> | cold down vs hot |
| CYB5R4    | 2.09E-10    | 1.00E-09    | 0.558331 | <b>-1.79105</b> | cold down vs hot |
| ARHGAP22  | 0.000175727 | 0.000385128 | 0.558331 | <b>-1.79105</b> | cold down vs hot |
| CDS1      | 0.000281341 | 0.00058535  | 0.558245 | <b>-1.79133</b> | cold down vs hot |
| RNF112    | 0.000563219 | 0.00108595  | 0.557972 | <b>-1.7922</b>  | cold down vs hot |
| PARP10    | 1.96E-09    | 8.66E-09    | 0.557659 | <b>-1.79321</b> | cold down vs hot |
| SATB1     | 0.000855061 | 0.00157247  | 0.557148 | <b>-1.79486</b> | cold down vs hot |
| TRIM47    | 4.51E-07    | 1.57E-06    | 0.557136 | <b>-1.79489</b> | cold down vs hot |
| MAP3K9    | 0.000299136 | 0.000617837 | 0.557132 | <b>-1.79491</b> | cold down vs hot |
| HTR1D     | 0.00527236  | 0.0073885   | 0.556627 | <b>-1.79654</b> | cold down vs hot |
| DLGAP3    | 0.000270031 | 0.000563428 | 0.556498 | <b>-1.79695</b> | cold down vs hot |
| ATP10A    | 0.00249865  | 0.00393529  | 0.556455 | <b>-1.79709</b> | cold down vs hot |
| CYP21A2   | 0.000477121 | 0.000938804 | 0.556372 | <b>-1.79736</b> | cold down vs hot |
| C21orf63  | 0.00018244  | 0.000397305 | 0.556057 | <b>-1.79838</b> | cold down vs hot |
| C9orf95   | 1.71E-12    | 9.30E-12    | 0.555979 | <b>-1.79863</b> | cold down vs hot |
| SAT1      | 1.88E-10    | 9.03E-10    | 0.555136 | <b>-1.80136</b> | cold down vs hot |
| KCNC3     | 3.52E-06    | 1.08E-05    | 0.555117 | <b>-1.80142</b> | cold down vs hot |
| KCND3     | 0.00322125  | 0.00491439  | 0.554989 | <b>-1.80184</b> | cold down vs hot |
| BMF       | 2.59E-08    | 1.02E-07    | 0.554624 | <b>-1.80302</b> | cold down vs hot |
| CASP4     | 1.73E-12    | 9.39E-12    | 0.554558 | <b>-1.80324</b> | cold down vs hot |
| AOC3      | 2.36E-07    | 8.44E-07    | 0.554442 | <b>-1.80361</b> | cold down vs hot |
| MPZL2     | 6.36E-05    | 0.000155858 | 0.554239 | <b>-1.80427</b> | cold down vs hot |
| PLEKHG1   | 1.28E-06    | 4.19E-06    | 0.55422  | <b>-1.80434</b> | cold down vs hot |
| FCER1A    | 0.00493909  | 0.00702458  | 0.553567 | <b>-1.80647</b> | cold down vs hot |
| OSTalpha  | 4.39E-10    | 2.05E-09    | 0.553081 | <b>-1.80805</b> | cold down vs hot |
| HIST1H2BH | 0.00158752  | 0.00267339  | 0.552892 | <b>-1.80867</b> | cold down vs hot |
| SLC16A11  | 0.00312576  | 0.00479005  | 0.552837 | <b>-1.80885</b> | cold down vs hot |
| ANKRD24   | 1.48E-05    | 4.10E-05    | 0.552377 | <b>-1.81036</b> | cold down vs hot |
| FAM166B   | 0.000475254 | 0.000935412 | 0.552268 | <b>-1.81072</b> | cold down vs hot |
| EBF3      | 0.00611058  | 0.00836095  | 0.551597 | <b>-1.81292</b> | cold down vs hot |
| OGFRL1    | 7.97E-09    | 3.32E-08    | 0.551086 | <b>-1.8146</b>  | cold down vs hot |
| LOC728743 | 8.42E-13    | 4.63E-12    | 0.551025 | <b>-1.8148</b>  | cold down vs hot |
| F11R      | 1.23E-06    | 4.05E-06    | 0.550582 | <b>-1.81626</b> | cold down vs hot |
| SLIT3     | 0.000874483 | 0.00160097  | 0.550302 | <b>-1.81718</b> | cold down vs hot |
| ARID5A    | 2.81E-13    | 1.57E-12    | 0.549852 | <b>-1.81867</b> | cold down vs hot |
| NCALD     | 0.000343902 | 0.000700541 | 0.549811 | <b>-1.81881</b> | cold down vs hot |
| TRIM59    | 5.11E-06    | 1.52E-05    | 0.549757 | <b>-1.81898</b> | cold down vs hot |
| GATM      | 0.000784173 | 0.00145772  | 0.549507 | <b>-1.81981</b> | cold down vs hot |
| LMOD1     | 5.66E-06    | 1.67E-05    | 0.54928  | <b>-1.82056</b> | cold down vs hot |
| MYL4      | 7.07E-06    | 2.06E-05    | 0.548403 | <b>-1.82348</b> | cold down vs hot |
| MALL      | 1.21E-05    | 3.41E-05    | 0.548067 | <b>-1.8246</b>  | cold down vs hot |
| SUSD2     | 1.63E-05    | 4.46E-05    | 0.548046 | <b>-1.82466</b> | cold down vs hot |
| SLC23A1   | 1.18E-05    | 3.32E-05    | 0.547698 | <b>-1.82582</b> | cold down vs hot |
| C20orf160 | 4.30E-09    | 1.84E-08    | 0.547358 | <b>-1.82696</b> | cold down vs hot |
| ANTXR2    | 5.69E-06    | 1.68E-05    | 0.547172 | <b>-1.82758</b> | cold down vs hot |
| PPP1R12B  | 7.05E-06    | 2.05E-05    | 0.547094 | <b>-1.82784</b> | cold down vs hot |
| TTC39C    | 4.85E-06    | 1.45E-05    | 0.546815 | <b>-1.82877</b> | cold down vs hot |
| RUNX1T1   | 0.000367937 | 0.000742549 | 0.546372 | <b>-1.83026</b> | cold down vs hot |
| DPF3      | 0.00100595  | 0.00180819  | 0.546199 | <b>-1.83083</b> | cold down vs hot |
| SPTLC3    | 0.00402565  | 0.00591492  | 0.546181 | <b>-1.83089</b> | cold down vs hot |
| CHDH      | 0.00687754  | 0.00926202  | 0.545981 | <b>-1.83157</b> | cold down vs hot |
| ADAMTSL1  | 0.000752776 | 0.00140467  | 0.54547  | <b>-1.83328</b> | cold down vs hot |
| CCR10     | 0.000964965 | 0.00174508  | 0.545432 | <b>-1.83341</b> | cold down vs hot |
| PDLIM1    | 1.63E-08    | 6.60E-08    | 0.54529  | <b>-1.83389</b> | cold down vs hot |
| NBEAL2    | 1.59E-15    | 9.85E-15    | 0.544895 | <b>-1.83522</b> | cold down vs hot |
| C7orf46   | 0.00090283  | 0.00164616  | 0.544807 | <b>-1.83551</b> | cold down vs hot |

|           |             |             |          |                 |                  |
|-----------|-------------|-------------|----------|-----------------|------------------|
| RASGRF2   | 7.43E-07    | 2.52E-06    | 0.544766 | <b>-1.83565</b> | cold down vs hot |
| KIAA1804  | 0.00136961  | 0.0023567   | 0.544757 | <b>-1.83568</b> | cold down vs hot |
| ADAMTS2   | 0.000376378 | 0.000758646 | 0.544704 | <b>-1.83586</b> | cold down vs hot |
| AMY2B     | 0.000218183 | 0.000466205 | 0.544571 | <b>-1.83631</b> | cold down vs hot |
| PKIA      | 0.00604604  | 0.0082848   | 0.544511 | <b>-1.83651</b> | cold down vs hot |
| LCN12     | 0.000101768 | 0.000238152 | 0.544085 | <b>-1.83795</b> | cold down vs hot |
| ACTR3C    | 0.000933322 | 0.00169331  | 0.543964 | <b>-1.83836</b> | cold down vs hot |
| SLC16A14  | 2.34E-07    | 8.40E-07    | 0.543483 | <b>-1.83998</b> | cold down vs hot |
| FAM117A   | 1.70E-13    | 9.59E-13    | 0.543258 | <b>-1.84075</b> | cold down vs hot |
| PCDHGA10  | 0.00381029  | 0.00565449  | 0.542859 | <b>-1.8421</b>  | cold down vs hot |
| RHOG      | 1.50E-20    | 1.15E-19    | 0.542519 | <b>-1.84325</b> | cold down vs hot |
| SLC46A2   | 4.41E-07    | 1.54E-06    | 0.542415 | <b>-1.84361</b> | cold down vs hot |
| C2CD2     | 6.85E-05    | 0.000166784 | 0.542414 | <b>-1.84361</b> | cold down vs hot |
| KCNJ2     | 1.59E-07    | 5.82E-07    | 0.542276 | <b>-1.84408</b> | cold down vs hot |
| CBLN3     | 5.32E-11    | 2.65E-10    | 0.542142 | <b>-1.84454</b> | cold down vs hot |
| SERPINB1  | 2.29E-13    | 1.29E-12    | 0.542099 | <b>-1.84468</b> | cold down vs hot |
| SGIP1     | 0.000417264 | 0.000833627 | 0.541975 | <b>-1.84511</b> | cold down vs hot |
| RPS6KA1   | 1.07E-11    | 5.57E-11    | 0.541937 | <b>-1.84523</b> | cold down vs hot |
| MVP       | 5.15E-11    | 2.57E-10    | 0.541862 | <b>-1.84549</b> | cold down vs hot |
| PLXC1     | 0.00265308  | 0.00414649  | 0.541578 | <b>-1.84646</b> | cold down vs hot |
| CLDN23    | 4.18E-07    | 1.46E-06    | 0.541555 | <b>-1.84654</b> | cold down vs hot |
| ABAT      | 7.25E-05    | 0.000175674 | 0.541145 | <b>-1.84793</b> | cold down vs hot |
| MORN3     | 5.69E-05    | 0.000140719 | 0.540991 | <b>-1.84846</b> | cold down vs hot |
| ITGB4     | 0.00191694  | 0.00314669  | 0.540966 | <b>-1.84855</b> | cold down vs hot |
| CCBP2     | 2.43E-06    | 7.65E-06    | 0.54083  | <b>-1.84901</b> | cold down vs hot |
| ZNF826    | 0.000800926 | 0.00148463  | 0.540663 | <b>-1.84958</b> | cold down vs hot |
| RASL11A   | 1.63E-08    | 6.60E-08    | 0.540598 | <b>-1.8498</b>  | cold down vs hot |
| GM2A      | 7.53E-16    | 4.75E-15    | 0.540353 | <b>-1.85064</b> | cold down vs hot |
| SH3TC1    | 4.44E-06    | 1.34E-05    | 0.540341 | <b>-1.85068</b> | cold down vs hot |
| SPARCL1   | 0.000345087 | 0.000702297 | 0.540338 | <b>-1.85069</b> | cold down vs hot |
| NRXN2     | 0.00322347  | 0.00491439  | 0.540229 | <b>-1.85107</b> | cold down vs hot |
| PLXND1    | 1.61E-09    | 7.16E-09    | 0.540182 | <b>-1.85123</b> | cold down vs hot |
| NAGK      | 3.21E-27    | 3.12E-26    | 0.540154 | <b>-1.85132</b> | cold down vs hot |
| CXCR2     | 0.000367464 | 0.000741822 | 0.540058 | <b>-1.85165</b> | cold down vs hot |
| C10orf55  | 1.33E-05    | 3.70E-05    | 0.539973 | <b>-1.85194</b> | cold down vs hot |
| HIST1H2AE | 0.00702719  | 0.0094235   | 0.539483 | <b>-1.85363</b> | cold down vs hot |
| RNF144B   | 2.66E-06    | 8.30E-06    | 0.539148 | <b>-1.85478</b> | cold down vs hot |
| ECHDC2    | 0.000138419 | 0.000313685 | 0.538853 | <b>-1.85579</b> | cold down vs hot |
| GDF10     | 0.00294865  | 0.00454639  | 0.538808 | <b>-1.85595</b> | cold down vs hot |
| FTL       | 5.91E-14    | 3.42E-13    | 0.538742 | <b>-1.85618</b> | cold down vs hot |
| TEK       | 2.21E-05    | 5.91E-05    | 0.538387 | <b>-1.8574</b>  | cold down vs hot |
| SCARA3    | 0.000914554 | 0.00166355  | 0.53829  | <b>-1.85773</b> | cold down vs hot |
| DUSP1     | 2.66E-06    | 8.30E-06    | 0.53804  | <b>-1.8586</b>  | cold down vs hot |
| CLEC3B    | 8.02E-06    | 2.32E-05    | 0.538019 | <b>-1.85867</b> | cold down vs hot |
| GPRIN3    | 0.000251928 | 0.000529549 | 0.537946 | <b>-1.85892</b> | cold down vs hot |
| ZNF101    | 1.68E-17    | 1.15E-16    | 0.537842 | <b>-1.85928</b> | cold down vs hot |
| SLC9A3R1  | 1.66E-11    | 8.56E-11    | 0.537708 | <b>-1.85975</b> | cold down vs hot |
| TFPI      | 9.82E-06    | 2.80E-05    | 0.53768  | <b>-1.85984</b> | cold down vs hot |
| MUSTN1    | 1.49E-06    | 4.82E-06    | 0.537572 | <b>-1.86021</b> | cold down vs hot |
| KCNN4     | 0.00669411  | 0.00904934  | 0.537121 | <b>-1.86178</b> | cold down vs hot |
| INADL     | 0.000838    | 0.00154501  | 0.537042 | <b>-1.86205</b> | cold down vs hot |
| S100B     | 0.00235166  | 0.00374081  | 0.536912 | <b>-1.8625</b>  | cold down vs hot |
| TOR3A     | 5.75E-13    | 3.18E-12    | 0.536334 | <b>-1.86451</b> | cold down vs hot |
| KL        | 3.61E-06    | 1.10E-05    | 0.536291 | <b>-1.86466</b> | cold down vs hot |
| PLXNA4    | 0.00512306  | 0.00722482  | 0.536261 | <b>-1.86476</b> | cold down vs hot |
| SNCG      | 0.000452203 | 0.00089653  | 0.536099 | <b>-1.86533</b> | cold down vs hot |
| SMAP2     | 8.37E-22    | 6.65E-21    | 0.535926 | <b>-1.86593</b> | cold down vs hot |
| OPTN      | 6.21E-10    | 2.85E-09    | 0.535474 | <b>-1.86751</b> | cold down vs hot |
| C2orf58   | 5.52E-06    | 1.64E-05    | 0.534799 | <b>-1.86986</b> | cold down vs hot |
| EMID1     | 0.00653918  | 0.00886377  | 0.534747 | <b>-1.87004</b> | cold down vs hot |
| SCN3A     | 0.00355869  | 0.00533817  | 0.53461  | <b>-1.87052</b> | cold down vs hot |
| C8orf46   | 0.00203     | 0.00330815  | 0.534161 | <b>-1.87209</b> | cold down vs hot |
| TMEM51    | 7.72E-11    | 3.80E-10    | 0.533858 | <b>-1.87316</b> | cold down vs hot |
| RUNC2C2   | 1.45E-06    | 4.72E-06    | 0.533341 | <b>-1.87497</b> | cold down vs hot |
| OLFML3    | 0.000466005 | 0.000921375 | 0.533282 | <b>-1.87518</b> | cold down vs hot |
| FCGRT     | 6.76E-09    | 2.84E-08    | 0.532959 | <b>-1.87632</b> | cold down vs hot |
| HTR2B     | 0.00284651  | 0.00440973  | 0.53272  | <b>-1.87716</b> | cold down vs hot |
| ABCA1     | 4.52E-08    | 1.75E-07    | 0.53253  | <b>-1.87783</b> | cold down vs hot |
| STAG3     | 0.00126196  | 0.00219637  | 0.532474 | <b>-1.87802</b> | cold down vs hot |
| CYP26B1   | 6.60E-05    | 0.000161154 | 0.532209 | <b>-1.87896</b> | cold down vs hot |
| HLA-J     | 2.66E-06    | 8.30E-06    | 0.532175 | <b>-1.87908</b> | cold down vs hot |
| L1TD1     | 0.00345505  | 0.00520897  | 0.531743 | <b>-1.88061</b> | cold down vs hot |
| GLUL      | 4.50E-12    | 2.40E-11    | 0.530944 | <b>-1.88344</b> | cold down vs hot |
| COTL1     | 5.53E-11    | 2.76E-10    | 0.530052 | <b>-1.88661</b> | cold down vs hot |
| ZNF385D   | 0.00107218  | 0.00191195  | 0.52999  | <b>-1.88683</b> | cold down vs hot |
| VGLL3     | 0.000216395 | 0.000462909 | 0.529901 | <b>-1.88715</b> | cold down vs hot |
| CACNA2D3  | 0.00366497  | 0.0054762   | 0.529858 | <b>-1.8873</b>  | cold down vs hot |

|           |             |             |          |                 |                  |
|-----------|-------------|-------------|----------|-----------------|------------------|
| GKAP1     | 6.69E-05    | 0.000163076 | 0.529652 | <b>-1.88803</b> | cold down vs hot |
| SCN1B     | 1.72E-05    | 4.70E-05    | 0.52931  | <b>-1.88925</b> | cold down vs hot |
| HEPH      | 6.62E-05    | 0.000161431 | 0.529192 | <b>-1.88967</b> | cold down vs hot |
| ST6GALNA4 | 2.32E-07    | 8.32E-07    | 0.529173 | <b>-1.88974</b> | cold down vs hot |
| C6orf174  | 0.00380994  | 0.00565449  | 0.529009 | <b>-1.89033</b> | cold down vs hot |
| GSDMC     | 0.000367065 | 0.000741473 | 0.52884  | <b>-1.89093</b> | cold down vs hot |
| TMEM132E  | 0.00134447  | 0.0023214   | 0.528788 | <b>-1.89112</b> | cold down vs hot |
| PPM1M     | 1.89E-14    | 1.12E-13    | 0.527497 | <b>-1.89575</b> | cold down vs hot |
| NFATC2    | 0.000850216 | 0.00156444  | 0.527261 | <b>-1.89659</b> | cold down vs hot |
| H2AFY2    | 0.000410064 | 0.000820463 | 0.527041 | <b>-1.89739</b> | cold down vs hot |
| SAMD9     | 7.13E-07    | 2.43E-06    | 0.526762 | <b>-1.89839</b> | cold down vs hot |
| CAPN11    | 0.000201941 | 0.00043556  | 0.526443 | <b>-1.89954</b> | cold down vs hot |
| SYBU      | 0.00088005  | 0.00160981  | 0.526383 | <b>-1.89976</b> | cold down vs hot |
| MCOLN2    | 1.26E-06    | 4.11E-06    | 0.525777 | <b>-1.90195</b> | cold down vs hot |
| CSPG5     | 0.00389422  | 0.00575946  | 0.525299 | <b>-1.90368</b> | cold down vs hot |
| RGS16     | 1.92E-05    | 5.19E-05    | 0.525093 | <b>-1.90442</b> | cold down vs hot |
| C13orf33  | 0.000304018 | 0.000626729 | 0.524889 | <b>-1.90516</b> | cold down vs hot |
| GPR113    | 1.94E-10    | 9.33E-10    | 0.5248   | <b>-1.90549</b> | cold down vs hot |
| LRRK1     | 7.04E-08    | 2.68E-07    | 0.524695 | <b>-1.90587</b> | cold down vs hot |
| CTSZ      | 7.13E-11    | 3.52E-10    | 0.524672 | <b>-1.90595</b> | cold down vs hot |
| ADD2      | 0.00410111  | 0.00600956  | 0.524176 | <b>-1.90776</b> | cold down vs hot |
| VAMP1     | 6.73E-09    | 2.83E-08    | 0.523976 | <b>-1.90849</b> | cold down vs hot |
| SFMBT2    | 4.30E-06    | 1.30E-05    | 0.523336 | <b>-1.91082</b> | cold down vs hot |
| REPS2     | 4.40E-06    | 1.33E-05    | 0.522933 | <b>-1.91229</b> | cold down vs hot |
| ACSF2     | 1.63E-06    | 5.27E-06    | 0.522401 | <b>-1.91424</b> | cold down vs hot |
| SLIT1     | 0.000472476 | 0.000931347 | 0.521381 | <b>-1.91798</b> | cold down vs hot |
| NFE2L3    | 6.86E-06    | 2.00E-05    | 0.520937 | <b>-1.91962</b> | cold down vs hot |
| LRRK33    | 1.89E-07    | 6.87E-07    | 0.520869 | <b>-1.91987</b> | cold down vs hot |
| MTMR9L    | 2.26E-05    | 6.04E-05    | 0.520615 | <b>-1.9208</b>  | cold down vs hot |
| LOC153684 | 3.30E-09    | 1.43E-08    | 0.520249 | <b>-1.92216</b> | cold down vs hot |
| EFHD2     | 2.99E-17    | 2.02E-16    | 0.519563 | <b>-1.92469</b> | cold down vs hot |
| EMILIN2   | 4.20E-08    | 1.64E-07    | 0.519475 | <b>-1.92502</b> | cold down vs hot |
| GJA5      | 3.06E-07    | 1.08E-06    | 0.519443 | <b>-1.92514</b> | cold down vs hot |
| CYTH1     | 3.53E-25    | 3.16E-24    | 0.519372 | <b>-1.9254</b>  | cold down vs hot |
| RET       | 2.08E-05    | 5.61E-05    | 0.519267 | <b>-1.92579</b> | cold down vs hot |
| KIAA1462  | 1.66E-08    | 6.70E-08    | 0.519178 | <b>-1.92612</b> | cold down vs hot |
| CHRD      | 4.35E-05    | 0.000110108 | 0.519051 | <b>-1.92659</b> | cold down vs hot |
| TBX5      | 0.00464489  | 0.00667305  | 0.518704 | <b>-1.92788</b> | cold down vs hot |
| F3        | 1.61E-05    | 4.43E-05    | 0.518533 | <b>-1.92852</b> | cold down vs hot |
| C1orf115  | 0.000141294 | 0.000319646 | 0.518513 | <b>-1.92859</b> | cold down vs hot |
| NUPR1     | 1.80E-05    | 4.89E-05    | 0.518252 | <b>-1.92956</b> | cold down vs hot |
| SAMD11    | 0.000876093 | 0.00160347  | 0.518007 | <b>-1.93048</b> | cold down vs hot |
| KCNE1     | 0.00138364  | 0.00237708  | 0.517241 | <b>-1.93333</b> | cold down vs hot |
| PLAGL1    | 1.76E-05    | 4.78E-05    | 0.516659 | <b>-1.93551</b> | cold down vs hot |
| IRF2      | 6.44E-36    | 8.48E-35    | 0.516531 | <b>-1.93599</b> | cold down vs hot |
| TRIM61    | 0.00226497  | 0.00362766  | 0.516353 | <b>-1.93666</b> | cold down vs hot |
| C12orf35  | 3.30E-10    | 1.56E-09    | 0.516267 | <b>-1.93698</b> | cold down vs hot |
| ZMAT1     | 0.000393079 | 0.000789383 | 0.515644 | <b>-1.93932</b> | cold down vs hot |
| GSDMD     | 1.43E-10    | 6.93E-10    | 0.515592 | <b>-1.93952</b> | cold down vs hot |
| LRRK4     | 8.85E-06    | 2.55E-05    | 0.515367 | <b>-1.94036</b> | cold down vs hot |
| NCRNA001  | 5.16E-05    | 0.000128903 | 0.51514  | <b>-1.94122</b> | cold down vs hot |
| C3orf36   | 6.40E-06    | 1.87E-05    | 0.51513  | <b>-1.94126</b> | cold down vs hot |
| ACP5      | 1.91E-06    | 6.10E-06    | 0.514517 | <b>-1.94357</b> | cold down vs hot |
| TP53INP1  | 5.57E-08    | 2.14E-07    | 0.514429 | <b>-1.9439</b>  | cold down vs hot |
| FBLN5     | 0.000202505 | 0.000436343 | 0.514211 | <b>-1.94473</b> | cold down vs hot |
| C5orf58   | 0.00396388  | 0.00584522  | 0.514187 | <b>-1.94482</b> | cold down vs hot |
| DDX60L    | 2.12E-08    | 8.47E-08    | 0.514129 | <b>-1.94504</b> | cold down vs hot |
| CBX7      | 1.02E-08    | 4.22E-08    | 0.513765 | <b>-1.94642</b> | cold down vs hot |
| FCGBP     | 0.00201273  | 0.00328501  | 0.513749 | <b>-1.94648</b> | cold down vs hot |
| SNX10     | 3.12E-06    | 9.65E-06    | 0.513543 | <b>-1.94726</b> | cold down vs hot |
| EXPH5     | 0.000378649 | 0.000762988 | 0.513349 | <b>-1.94799</b> | cold down vs hot |
| USP18     | 8.47E-08    | 3.20E-07    | 0.513308 | <b>-1.94815</b> | cold down vs hot |
| ABC84     | 0.00569505  | 0.00787493  | 0.512464 | <b>-1.95136</b> | cold down vs hot |
| GAS6      | 2.28E-07    | 8.19E-07    | 0.512201 | <b>-1.95236</b> | cold down vs hot |
| ADAMTSL2  | 3.84E-05    | 9.82E-05    | 0.512009 | <b>-1.95309</b> | cold down vs hot |
| RND1      | 2.23E-10    | 1.06E-09    | 0.511783 | <b>-1.95395</b> | cold down vs hot |
| TIFA      | 1.92E-19    | 1.43E-18    | 0.51172  | <b>-1.95419</b> | cold down vs hot |
| EGFL6     | 0.000522441 | 0.00101815  | 0.511319 | <b>-1.95573</b> | cold down vs hot |
| ECSCR     | 1.31E-06    | 4.28E-06    | 0.511115 | <b>-1.95651</b> | cold down vs hot |
| GJA4      | 7.03E-12    | 3.68E-11    | 0.511112 | <b>-1.95652</b> | cold down vs hot |
| HERC5     | 2.30E-06    | 7.25E-06    | 0.510445 | <b>-1.95907</b> | cold down vs hot |
| PREX1     | 3.64E-08    | 1.42E-07    | 0.510388 | <b>-1.95929</b> | cold down vs hot |
| HSPA7     | 0.00113054  | 0.0020018   | 0.510068 | <b>-1.96052</b> | cold down vs hot |
| SP110     | 2.62E-19    | 1.95E-18    | 0.509964 | <b>-1.96092</b> | cold down vs hot |
| AXL       | 5.37E-05    | 0.000133661 | 0.509915 | <b>-1.96111</b> | cold down vs hot |
| CFLAR     | 5.38E-24    | 4.61E-23    | 0.509761 | <b>-1.9617</b>  | cold down vs hot |
| MUC1      | 2.40E-05    | 6.38E-05    | 0.509686 | <b>-1.96199</b> | cold down vs hot |

|           |             |             |          |                 |                  |
|-----------|-------------|-------------|----------|-----------------|------------------|
| ELL2      | 1.91E-10    | 9.18E-10    | 0.509591 | <b>-1.96236</b> | cold down vs hot |
| TMEM25    | 0.0010372   | 0.00185769  | 0.509492 | <b>-1.96274</b> | cold down vs hot |
| C8orf4    | 3.49E-05    | 8.98E-05    | 0.509428 | <b>-1.96299</b> | cold down vs hot |
| ITGA8     | 0.00529206  | 0.00740714  | 0.50812  | <b>-1.96804</b> | cold down vs hot |
| RPS2P32   | 0.00016331  | 0.000362418 | 0.507997 | <b>-1.96851</b> | cold down vs hot |
| TNXB      | 0.000356468 | 0.000721905 | 0.50752  | <b>-1.97036</b> | cold down vs hot |
| CACNA2D4  | 0.000226288 | 0.000480295 | 0.507451 | <b>-1.97063</b> | cold down vs hot |
| PPP2R2B   | 0.00194752  | 0.00319047  | 0.506926 | <b>-1.97267</b> | cold down vs hot |
| TMEM150C  | 4.01E-06    | 1.22E-05    | 0.506628 | <b>-1.97383</b> | cold down vs hot |
| MYOF      | 2.56E-07    | 9.13E-07    | 0.506601 | <b>-1.97394</b> | cold down vs hot |
| NCRNA000  | 0.000831389 | 0.00153369  | 0.506204 | <b>-1.97549</b> | cold down vs hot |
| C1orf130  | 0.00681312  | 0.00919118  | 0.50508  | <b>-1.97988</b> | cold down vs hot |
| UPB1      | 1.59E-05    | 4.36E-05    | 0.504732 | <b>-1.98125</b> | cold down vs hot |
| PDE1B     | 2.70E-08    | 1.07E-07    | 0.504602 | <b>-1.98176</b> | cold down vs hot |
| RLN2      | 0.00226013  | 0.0036208   | 0.504543 | <b>-1.98199</b> | cold down vs hot |
| UNC93B1   | 1.18E-16    | 7.78E-16    | 0.504166 | <b>-1.98347</b> | cold down vs hot |
| KCNT2     | 0.000611779 | 0.00117059  | 0.503872 | <b>-1.98463</b> | cold down vs hot |
| FAM26E    | 1.75E-07    | 6.38E-07    | 0.503694 | <b>-1.98533</b> | cold down vs hot |
| APOE      | 8.16E-05    | 0.000195196 | 0.503666 | <b>-1.98544</b> | cold down vs hot |
| MEGF6     | 6.45E-05    | 0.000157749 | 0.503658 | <b>-1.98548</b> | cold down vs hot |
| FXYD6     | 5.35E-06    | 1.59E-05    | 0.503202 | <b>-1.98727</b> | cold down vs hot |
| PLAUR     | 1.29E-05    | 3.61E-05    | 0.502857 | <b>-1.98864</b> | cold down vs hot |
| ATG16L2   | 2.02E-12    | 1.09E-11    | 0.502567 | <b>-1.98978</b> | cold down vs hot |
| FOXP1     | 3.63E-10    | 1.70E-09    | 0.502483 | <b>-1.99012</b> | cold down vs hot |
| C19orf36  | 3.29E-06    | 1.01E-05    | 0.502119 | <b>-1.99156</b> | cold down vs hot |
| ACSM3     | 0.0002887   | 0.000598935 | 0.502088 | <b>-1.99168</b> | cold down vs hot |
| CTF1      | 0.000141871 | 0.000320841 | 0.501708 | <b>-1.99319</b> | cold down vs hot |
| CHODL     | 0.000789279 | 0.00146512  | 0.501556 | <b>-1.9938</b>  | cold down vs hot |
| RICH2     | 2.80E-09    | 1.22E-08    | 0.501292 | <b>-1.99485</b> | cold down vs hot |
| CD83      | 1.07E-12    | 5.87E-12    | 0.500827 | <b>-1.9967</b>  | cold down vs hot |
| DCN       | 0.000506004 | 0.000988482 | 0.500681 | <b>-1.99728</b> | cold down vs hot |
| FBXO27    | 0.00106808  | 0.00190569  | 0.500173 | <b>-1.99931</b> | cold down vs hot |
| LOC441869 | 1.74E-05    | 4.75E-05    | 0.499805 | <b>-2.00078</b> | cold down vs hot |
| LOC388242 | 2.26E-07    | 8.11E-07    | 0.499399 | <b>-2.00241</b> | cold down vs hot |
| MPP1      | 8.41E-24    | 7.16E-23    | 0.498806 | <b>-2.00479</b> | cold down vs hot |
| IFIT1     | 2.30E-05    | 6.14E-05    | 0.498731 | <b>-2.00509</b> | cold down vs hot |
| MCART6    | 4.44E-08    | 1.72E-07    | 0.4982   | <b>-2.00723</b> | cold down vs hot |
| MRGPRF    | 2.56E-06    | 8.01E-06    | 0.497728 | <b>-2.00913</b> | cold down vs hot |
| HEG1      | 8.86E-14    | 5.09E-13    | 0.497652 | <b>-2.00944</b> | cold down vs hot |
| STARD5    | 4.93E-16    | 3.15E-15    | 0.49756  | <b>-2.00981</b> | cold down vs hot |
| GGT3P     | 1.68E-05    | 4.59E-05    | 0.496643 | <b>-2.01352</b> | cold down vs hot |
| APOC4     | 0.000161829 | 0.000359864 | 0.496415 | <b>-2.01444</b> | cold down vs hot |
| ST18      | 4.60E-06    | 1.38E-05    | 0.496383 | <b>-2.01457</b> | cold down vs hot |
| FXYD7     | 0.0042756   | 0.00622055  | 0.496089 | <b>-2.01577</b> | cold down vs hot |
| AMZ1      | 9.06E-05    | 0.000214557 | 0.495745 | <b>-2.01717</b> | cold down vs hot |
| COL14A1   | 7.51E-05    | 0.000181143 | 0.495623 | <b>-2.01766</b> | cold down vs hot |
| RGS2      | 2.75E-05    | 7.22E-05    | 0.495499 | <b>-2.01817</b> | cold down vs hot |
| TMEM56    | 0.00147522  | 0.00251129  | 0.495408 | <b>-2.01854</b> | cold down vs hot |
| FRZB      | 0.000631385 | 0.00120176  | 0.495347 | <b>-2.01879</b> | cold down vs hot |
| PLEKHF1   | 1.07E-13    | 6.13E-13    | 0.495067 | <b>-2.01993</b> | cold down vs hot |
| ELN       | 0.0056382   | 0.00781288  | 0.494879 | <b>-2.02069</b> | cold down vs hot |
| MT1F      | 4.62E-05    | 0.000116455 | 0.494634 | <b>-2.0217</b>  | cold down vs hot |
| WISP1     | 5.84E-07    | 2.01E-06    | 0.494521 | <b>-2.02216</b> | cold down vs hot |
| A2M       | 2.31E-06    | 7.30E-06    | 0.494365 | <b>-2.0228</b>  | cold down vs hot |
| SLC15A2   | 0.000131301 | 0.000299217 | 0.494247 | <b>-2.02328</b> | cold down vs hot |
| RHBDP2    | 3.60E-12    | 1.92E-11    | 0.494184 | <b>-2.02354</b> | cold down vs hot |
| ITGA11    | 0.000152438 | 0.000341541 | 0.494133 | <b>-2.02375</b> | cold down vs hot |
| BCL2A1    | 9.28E-05    | 0.000219147 | 0.494006 | <b>-2.02427</b> | cold down vs hot |
| DLG2      | 5.51E-05    | 0.000136672 | 0.494003 | <b>-2.02428</b> | cold down vs hot |
| FBXL16    | 0.000635401 | 0.00120835  | 0.493759 | <b>-2.02528</b> | cold down vs hot |
| CLEC4F    | 0.000316346 | 0.000649475 | 0.49362  | <b>-2.02585</b> | cold down vs hot |
| FAM167A   | 0.00101952  | 0.00182862  | 0.493211 | <b>-2.02753</b> | cold down vs hot |
| XBP1      | 8.12E-17    | 5.39E-16    | 0.493146 | <b>-2.0278</b>  | cold down vs hot |
| C2CD4B    | 8.28E-05    | 0.000197779 | 0.492925 | <b>-2.02871</b> | cold down vs hot |
| CHST8     | 0.00392993  | 0.00580302  | 0.492773 | <b>-2.02933</b> | cold down vs hot |
| FIBIN     | 0.000904087 | 0.00164731  | 0.492601 | <b>-2.03004</b> | cold down vs hot |
| LAYN      | 1.74E-05    | 4.76E-05    | 0.492187 | <b>-2.03175</b> | cold down vs hot |
| SLC47A1   | 0.000422438 | 0.000843153 | 0.491937 | <b>-2.03278</b> | cold down vs hot |
| SYNGR2    | 2.81E-17    | 1.90E-16    | 0.491187 | <b>-2.03589</b> | cold down vs hot |
| C13orf15  | 5.72E-16    | 3.63E-15    | 0.49108  | <b>-2.03633</b> | cold down vs hot |
| RNF213    | 2.95E-24    | 2.57E-23    | 0.490834 | <b>-2.03735</b> | cold down vs hot |
| GCHFR     | 2.55E-08    | 1.01E-07    | 0.490631 | <b>-2.03819</b> | cold down vs hot |
| RAB39     | 3.03E-06    | 9.40E-06    | 0.490391 | <b>-2.03919</b> | cold down vs hot |
| STON2     | 3.93E-06    | 1.20E-05    | 0.4903   | <b>-2.03957</b> | cold down vs hot |
| TBC1D2    | 1.21E-11    | 6.28E-11    | 0.490287 | <b>-2.03962</b> | cold down vs hot |
| EPB41L3   | 2.11E-07    | 7.61E-07    | 0.489678 | <b>-2.04216</b> | cold down vs hot |
| DDX26B    | 2.36E-07    | 8.44E-07    | 0.489648 | <b>-2.04228</b> | cold down vs hot |

|           |             |             |          |                 |                  |
|-----------|-------------|-------------|----------|-----------------|------------------|
| FCGR2A    | 2.48E-08    | 9.83E-08    | 0.489464 | <b>-2.04305</b> | cold down vs hot |
| LY96      | 6.38E-06    | 1.87E-05    | 0.489463 | <b>-2.04306</b> | cold down vs hot |
| MXRA5     | 0.000202069 | 0.000435691 | 0.489313 | <b>-2.04368</b> | cold down vs hot |
| CISH      | 3.89E-16    | 2.50E-15    | 0.489293 | <b>-2.04377</b> | cold down vs hot |
| SV2B      | 0.00219356  | 0.00353497  | 0.489159 | <b>-2.04432</b> | cold down vs hot |
| LIPA      | 4.90E-18    | 3.42E-17    | 0.488826 | <b>-2.04572</b> | cold down vs hot |
| CTAGE9    | 0.00244017  | 0.0038609   | 0.488778 | <b>-2.04592</b> | cold down vs hot |
| CLEC2B    | 7.45E-07    | 2.53E-06    | 0.487638 | <b>-2.0507</b>  | cold down vs hot |
| OTOA      | 5.54E-05    | 0.00013745  | 0.487177 | <b>-2.05264</b> | cold down vs hot |
| CNN2      | 5.96E-11    | 2.96E-10    | 0.486311 | <b>-2.0563</b>  | cold down vs hot |
| ELOVL7    | 0.000467792 | 0.000924194 | 0.485994 | <b>-2.05764</b> | cold down vs hot |
| PCSK5     | 0.000123011 | 0.000283192 | 0.4855   | <b>-2.05973</b> | cold down vs hot |
| KRT86     | 0.00225213  | 0.00360974  | 0.485243 | <b>-2.06082</b> | cold down vs hot |
| ZNF385A   | 4.01E-13    | 2.23E-12    | 0.485152 | <b>-2.06121</b> | cold down vs hot |
| SLC16A13  | 2.51E-07    | 8.95E-07    | 0.485088 | <b>-2.06148</b> | cold down vs hot |
| PIK3CD    | 4.86E-09    | 2.07E-08    | 0.484886 | <b>-2.06234</b> | cold down vs hot |
| MTTP      | 0.000175357 | 0.000384566 | 0.484535 | <b>-2.06384</b> | cold down vs hot |
| CASZ1     | 7.30E-06    | 2.12E-05    | 0.484387 | <b>-2.06447</b> | cold down vs hot |
| CPM       | 4.73E-08    | 1.83E-07    | 0.483755 | <b>-2.06716</b> | cold down vs hot |
| PRRG4     | 0.000150529 | 0.000337795 | 0.483634 | <b>-2.06768</b> | cold down vs hot |
| LRIG1     | 3.06E-07    | 1.08E-06    | 0.483612 | <b>-2.06777</b> | cold down vs hot |
| CTSC      | 1.65E-16    | 1.08E-15    | 0.483488 | <b>-2.0683</b>  | cold down vs hot |
| KCNE4     | 2.21E-05    | 5.93E-05    | 0.483249 | <b>-2.06933</b> | cold down vs hot |
| TEC       | 5.16E-09    | 2.20E-08    | 0.483088 | <b>-2.07002</b> | cold down vs hot |
| CCRL1     | 8.63E-06    | 2.49E-05    | 0.482912 | <b>-2.07077</b> | cold down vs hot |
| KCNA6     | 0.00567519  | 0.00785913  | 0.482908 | <b>-2.07079</b> | cold down vs hot |
| TBX1      | 0.000807981 | 0.00149558  | 0.482725 | <b>-2.07157</b> | cold down vs hot |
| LOC441294 | 0.00104278  | 0.00186565  | 0.482306 | <b>-2.07337</b> | cold down vs hot |
| NFKB2     | 3.14E-21    | 2.44E-20    | 0.482279 | <b>-2.07349</b> | cold down vs hot |
| TLR6      | 3.62E-07    | 1.27E-06    | 0.482144 | <b>-2.07407</b> | cold down vs hot |
| HGF       | 0.000368703 | 0.000743864 | 0.481949 | <b>-2.07491</b> | cold down vs hot |
| MATN2     | 0.000267122 | 0.000557894 | 0.481787 | <b>-2.0756</b>  | cold down vs hot |
| APLNR     | 2.81E-05    | 7.36E-05    | 0.481684 | <b>-2.07605</b> | cold down vs hot |
| TMCC3     | 7.82E-09    | 3.27E-08    | 0.481678 | <b>-2.07608</b> | cold down vs hot |
| PPARG     | 2.12E-09    | 9.30E-09    | 0.481638 | <b>-2.07625</b> | cold down vs hot |
| SLC26A9   | 1.15E-05    | 3.24E-05    | 0.481354 | <b>-2.07747</b> | cold down vs hot |
| SIGLECP3  | 4.27E-06    | 1.29E-05    | 0.480952 | <b>-2.07921</b> | cold down vs hot |
| SCARF1    | 9.18E-14    | 5.27E-13    | 0.480625 | <b>-2.08062</b> | cold down vs hot |
| RNF212    | 0.00598351  | 0.00821189  | 0.480589 | <b>-2.08078</b> | cold down vs hot |
| HS3ST3A1  | 0.000683413 | 0.00128616  | 0.480441 | <b>-2.08142</b> | cold down vs hot |
| THBS1     | 2.56E-06    | 8.02E-06    | 0.480248 | <b>-2.08226</b> | cold down vs hot |
| MRV11     | 2.31E-10    | 1.10E-09    | 0.479726 | <b>-2.08452</b> | cold down vs hot |
| SULT1A1   | 1.79E-05    | 4.86E-05    | 0.479495 | <b>-2.08553</b> | cold down vs hot |
| LTBP2     | 4.09E-07    | 1.43E-06    | 0.479339 | <b>-2.0862</b>  | cold down vs hot |
| IKBKE     | 1.80E-16    | 1.17E-15    | 0.478787 | <b>-2.08861</b> | cold down vs hot |
| MAP3K14   | 1.09E-20    | 8.33E-20    | 0.478777 | <b>-2.08865</b> | cold down vs hot |
| TCIRG1    | 1.95E-14    | 1.15E-13    | 0.478675 | <b>-2.0891</b>  | cold down vs hot |
| GPSM3     | 5.12E-16    | 3.26E-15    | 0.478669 | <b>-2.08912</b> | cold down vs hot |
| PRND      | 0.0011175   | 0.00198141  | 0.478519 | <b>-2.08978</b> | cold down vs hot |
| PLA2G16   | 6.14E-07    | 2.10E-06    | 0.478051 | <b>-2.09183</b> | cold down vs hot |
| FGD6      | 6.33E-12    | 3.33E-11    | 0.477922 | <b>-2.09239</b> | cold down vs hot |
| AGMAT     | 2.44E-06    | 7.68E-06    | 0.477816 | <b>-2.09285</b> | cold down vs hot |
| HSPB8     | 0.00213559  | 0.00345264  | 0.477532 | <b>-2.0941</b>  | cold down vs hot |
| CCDC80    | 1.97E-06    | 6.29E-06    | 0.477095 | <b>-2.09602</b> | cold down vs hot |
| MT1L      | 0.00570306  | 0.007881    | 0.47696  | <b>-2.09661</b> | cold down vs hot |
| VWA5A     | 4.97E-07    | 1.73E-06    | 0.476406 | <b>-2.09905</b> | cold down vs hot |
| IL12A     | 6.57E-05    | 0.000160616 | 0.475988 | <b>-2.1009</b>  | cold down vs hot |
| SPINT1    | 7.49E-05    | 0.000180995 | 0.475728 | <b>-2.10204</b> | cold down vs hot |
| ANKRD5    | 8.82E-05    | 0.000209298 | 0.475551 | <b>-2.10282</b> | cold down vs hot |
| SRL       | 2.87E-07    | 1.02E-06    | 0.475524 | <b>-2.10294</b> | cold down vs hot |
| FNBP1     | 3.56E-21    | 2.76E-20    | 0.475367 | <b>-2.10364</b> | cold down vs hot |
| SLC37A1   | 1.19E-06    | 3.91E-06    | 0.475006 | <b>-2.10524</b> | cold down vs hot |
| THBD      | 6.96E-08    | 2.66E-07    | 0.47489  | <b>-2.10575</b> | cold down vs hot |
| SLC12A5   | 5.23E-05    | 0.000130515 | 0.474361 | <b>-2.1081</b>  | cold down vs hot |
| TMEM106A  | 1.66E-15    | 1.03E-14    | 0.473963 | <b>-2.10987</b> | cold down vs hot |
| GBP6      | 0.00100681  | 0.00180872  | 0.47383  | <b>-2.11046</b> | cold down vs hot |
| RGS10     | 5.41E-13    | 2.99E-12    | 0.473533 | <b>-2.11178</b> | cold down vs hot |
| NKD2      | 0.000165662 | 0.000366268 | 0.47352  | <b>-2.11184</b> | cold down vs hot |
| DMRT3     | 6.74E-09    | 2.84E-08    | 0.472851 | <b>-2.11483</b> | cold down vs hot |
| IGFBP7    | 3.80E-10    | 1.78E-09    | 0.472653 | <b>-2.11572</b> | cold down vs hot |
| IRF9      | 7.50E-23    | 6.15E-22    | 0.472181 | <b>-2.11783</b> | cold down vs hot |
| CTGF      | 1.55E-06    | 5.02E-06    | 0.472029 | <b>-2.11852</b> | cold down vs hot |
| VENTX     | 8.54E-07    | 2.86E-06    | 0.47136  | <b>-2.12152</b> | cold down vs hot |
| ERAP1     | 4.52E-17    | 3.03E-16    | 0.470712 | <b>-2.12444</b> | cold down vs hot |
| DDX58     | 8.86E-10    | 4.02E-09    | 0.469935 | <b>-2.12796</b> | cold down vs hot |
| EGR2      | 1.36E-08    | 5.55E-08    | 0.469826 | <b>-2.12845</b> | cold down vs hot |
| EN1       | 2.15E-05    | 5.78E-05    | 0.469524 | <b>-2.12982</b> | cold down vs hot |

|           |             |             |          |                 |                  |
|-----------|-------------|-------------|----------|-----------------|------------------|
| IFI6      | 3.42E-06    | 1.05E-05    | 0.469406 | <b>-2.13035</b> | cold down vs hot |
| CEACAM1   | 0.000815441 | 0.00150768  | 0.469229 | <b>-2.13116</b> | cold down vs hot |
| TAGLN     | 6.84E-08    | 2.61E-07    | 0.468905 | <b>-2.13263</b> | cold down vs hot |
| MMP23B    | 3.56E-07    | 1.25E-06    | 0.468774 | <b>-2.13322</b> | cold down vs hot |
| DGKE      | 2.97E-11    | 1.51E-10    | 0.468656 | <b>-2.13376</b> | cold down vs hot |
| ZC3H12A   | 1.70E-12    | 9.23E-12    | 0.4682   | <b>-2.13584</b> | cold down vs hot |
| IRAK3     | 2.84E-06    | 8.85E-06    | 0.46809  | <b>-2.13634</b> | cold down vs hot |
| PODN      | 1.40E-05    | 3.89E-05    | 0.467835 | <b>-2.13751</b> | cold down vs hot |
| LLGL2     | 3.41E-08    | 1.34E-07    | 0.467802 | <b>-2.13766</b> | cold down vs hot |
| FBXO2     | 8.44E-05    | 0.00020087  | 0.467714 | <b>-2.13806</b> | cold down vs hot |
| XKR8      | 1.91E-06    | 6.11E-06    | 0.467463 | <b>-2.13921</b> | cold down vs hot |
| PIWIL4    | 1.86E-07    | 6.76E-07    | 0.467007 | <b>-2.14129</b> | cold down vs hot |
| WDR86     | 0.000126129 | 0.000289103 | 0.466597 | <b>-2.14318</b> | cold down vs hot |
| TGFB1     | 3.41E-11    | 1.73E-10    | 0.466413 | <b>-2.14402</b> | cold down vs hot |
| CASQ1     | 1.16E-05    | 3.27E-05    | 0.466324 | <b>-2.14443</b> | cold down vs hot |
| ANPEP     | 7.97E-05    | 0.000191035 | 0.466156 | <b>-2.1452</b>  | cold down vs hot |
| N4BP2L1   | 6.83E-10    | 3.13E-09    | 0.466086 | <b>-2.14553</b> | cold down vs hot |
| BCAT1     | 1.22E-05    | 3.42E-05    | 0.46597  | <b>-2.14606</b> | cold down vs hot |
| FAM90A1   | 0.000253813 | 0.000532996 | 0.46458  | <b>-2.15248</b> | cold down vs hot |
| NEBL      | 5.65E-05    | 0.000139828 | 0.464182 | <b>-2.15433</b> | cold down vs hot |
| TSC22D3   | 1.60E-13    | 9.09E-13    | 0.463827 | <b>-2.15598</b> | cold down vs hot |
| AURKC     | 1.86E-07    | 6.76E-07    | 0.463629 | <b>-2.1569</b>  | cold down vs hot |
| CD200     | 1.41E-06    | 4.58E-06    | 0.463469 | <b>-2.15764</b> | cold down vs hot |
| TCN2      | 5.82E-11    | 2.89E-10    | 0.463316 | <b>-2.15836</b> | cold down vs hot |
| ARRB2     | 1.21E-25    | 1.10E-24    | 0.463199 | <b>-2.1589</b>  | cold down vs hot |
| CRB3      | 1.24E-06    | 4.05E-06    | 0.463027 | <b>-2.1597</b>  | cold down vs hot |
| PTGER3    | 7.03E-06    | 2.05E-05    | 0.462765 | <b>-2.16092</b> | cold down vs hot |
| TXNIP     | 1.20E-15    | 7.50E-15    | 0.462491 | <b>-2.16221</b> | cold down vs hot |
| PLA2G4C   | 7.89E-08    | 2.99E-07    | 0.462114 | <b>-2.16397</b> | cold down vs hot |
| IL4R      | 1.90E-14    | 1.12E-13    | 0.461766 | <b>-2.1656</b>  | cold down vs hot |
| MX2       | 3.77E-05    | 9.65E-05    | 0.461668 | <b>-2.16606</b> | cold down vs hot |
| PSME1     | 2.77E-36    | 3.73E-35    | 0.461528 | <b>-2.16671</b> | cold down vs hot |
| TRERF1    | 9.54E-09    | 3.94E-08    | 0.461325 | <b>-2.16767</b> | cold down vs hot |
| SNCAIP    | 6.13E-05    | 0.000150741 | 0.46089  | <b>-2.16971</b> | cold down vs hot |
| POPDC2    | 6.11E-13    | 3.37E-12    | 0.459259 | <b>-2.17742</b> | cold down vs hot |
| TRIM14    | 7.87E-20    | 5.91E-19    | 0.45911  | <b>-2.17813</b> | cold down vs hot |
| C14orf182 | 1.54E-07    | 5.65E-07    | 0.4589   | <b>-2.17913</b> | cold down vs hot |
| ZFP36     | 3.03E-14    | 1.77E-13    | 0.458896 | <b>-2.17914</b> | cold down vs hot |
| S100A4    | 0.00013153  | 0.000299635 | 0.458453 | <b>-2.18125</b> | cold down vs hot |
| TFEB      | 1.00E-15    | 6.26E-15    | 0.458    | <b>-2.1834</b>  | cold down vs hot |
| TRIM34    | 1.33E-15    | 8.29E-15    | 0.457897 | <b>-2.1839</b>  | cold down vs hot |
| CYLD      | 6.86E-21    | 5.28E-20    | 0.457893 | <b>-2.18391</b> | cold down vs hot |
| SGSM1     | 5.42E-05    | 0.000134686 | 0.457767 | <b>-2.18452</b> | cold down vs hot |
| ZC4H2     | 1.03E-05    | 2.93E-05    | 0.457588 | <b>-2.18537</b> | cold down vs hot |
| SYT15     | 5.41E-10    | 2.50E-09    | 0.457572 | <b>-2.18545</b> | cold down vs hot |
| P4HTM     | 7.70E-07    | 2.60E-06    | 0.457313 | <b>-2.18669</b> | cold down vs hot |
| LAP3      | 3.95E-24    | 3.41E-23    | 0.456893 | <b>-2.1887</b>  | cold down vs hot |
| KIAA1274  | 2.12E-08    | 8.48E-08    | 0.45624  | <b>-2.19183</b> | cold down vs hot |
| PHF11     | 1.84E-15    | 1.13E-14    | 0.45583  | <b>-2.1938</b>  | cold down vs hot |
| INSM1     | 0.000485159 | 0.000952035 | 0.455568 | <b>-2.19506</b> | cold down vs hot |
| SLC9A7    | 0.000537591 | 0.00104301  | 0.455355 | <b>-2.19609</b> | cold down vs hot |
| PHOSPHO1  | 3.55E-10    | 1.67E-09    | 0.45512  | <b>-2.19722</b> | cold down vs hot |
| LOC100132 | 1.41E-06    | 4.58E-06    | 0.455067 | <b>-2.19748</b> | cold down vs hot |
| NHS       | 4.89E-06    | 1.46E-05    | 0.454965 | <b>-2.19797</b> | cold down vs hot |
| CYR61     | 1.63E-07    | 5.96E-07    | 0.45477  | <b>-2.19892</b> | cold down vs hot |
| PID1      | 8.59E-06    | 2.48E-05    | 0.454745 | <b>-2.19904</b> | cold down vs hot |
| IL27RA    | 5.18E-07    | 1.79E-06    | 0.454544 | <b>-2.20001</b> | cold down vs hot |
| MPZL3     | 9.57E-06    | 2.73E-05    | 0.454093 | <b>-2.20219</b> | cold down vs hot |
| C20orf197 | 2.02E-08    | 8.08E-08    | 0.454055 | <b>-2.20238</b> | cold down vs hot |
| C2orf55   | 3.18E-09    | 1.38E-08    | 0.453338 | <b>-2.20586</b> | cold down vs hot |
| VEGFC     | 1.65E-11    | 8.52E-11    | 0.452919 | <b>-2.2079</b>  | cold down vs hot |
| SYNC      | 9.79E-06    | 2.79E-05    | 0.452742 | <b>-2.20876</b> | cold down vs hot |
| ITGBL1    | 0.00234354  | 0.00373151  | 0.452579 | <b>-2.20956</b> | cold down vs hot |
| CLCN4     | 0.000178081 | 0.000389503 | 0.452337 | <b>-2.21074</b> | cold down vs hot |
| ST6GALNA4 | 0.000753984 | 0.001406    | 0.452262 | <b>-2.21111</b> | cold down vs hot |
| C9orf66   | 2.27E-07    | 8.16E-07    | 0.452111 | <b>-2.21185</b> | cold down vs hot |
| CD177     | 0.00215687  | 0.00348272  | 0.451857 | <b>-2.21309</b> | cold down vs hot |
| GMIP      | 9.58E-23    | 7.81E-22    | 0.451813 | <b>-2.2133</b>  | cold down vs hot |
| LOC388692 | 3.18E-07    | 1.12E-06    | 0.451312 | <b>-2.21576</b> | cold down vs hot |
| CDA       | 1.75E-07    | 6.39E-07    | 0.451144 | <b>-2.21659</b> | cold down vs hot |
| VTN       | 0.000150708 | 0.000338013 | 0.450857 | <b>-2.218</b>   | cold down vs hot |
| LFNG      | 4.75E-12    | 2.52E-11    | 0.450724 | <b>-2.21865</b> | cold down vs hot |
| MYH11     | 4.87E-05    | 0.000122196 | 0.450187 | <b>-2.2213</b>  | cold down vs hot |
| JAK2      | 1.11E-12    | 6.04E-12    | 0.449607 | <b>-2.22416</b> | cold down vs hot |
| GIPR      | 1.71E-06    | 5.49E-06    | 0.449598 | <b>-2.22421</b> | cold down vs hot |
| C7orf58   | 0.000205223 | 0.000441907 | 0.449459 | <b>-2.2249</b>  | cold down vs hot |
| GADD45B   | 6.45E-17    | 4.29E-16    | 0.449383 | <b>-2.22527</b> | cold down vs hot |

|           |             |             |          |                 |                  |
|-----------|-------------|-------------|----------|-----------------|------------------|
| C17orf44  | 5.69E-17    | 3.80E-16    | 0.449017 | <b>-2.22709</b> | cold down vs hot |
| SCUBE1    | 0.00354169  | 0.00531878  | 0.448948 | <b>-2.22743</b> | cold down vs hot |
| ACVRL1    | 9.56E-16    | 6.00E-15    | 0.448942 | <b>-2.22746</b> | cold down vs hot |
| IFI44     | 1.70E-08    | 6.86E-08    | 0.448656 | <b>-2.22888</b> | cold down vs hot |
| ADAMTS10  | 2.25E-06    | 7.11E-06    | 0.448425 | <b>-2.23003</b> | cold down vs hot |
| CRISPLD2  | 1.82E-09    | 8.04E-09    | 0.448045 | <b>-2.23192</b> | cold down vs hot |
| ZNF366    | 4.08E-10    | 1.91E-09    | 0.447666 | <b>-2.23384</b> | cold down vs hot |
| PARP8     | 4.71E-07    | 1.64E-06    | 0.447555 | <b>-2.23436</b> | cold down vs hot |
| PCDHAC2   | 0.00384773  | 0.00570016  | 0.447233 | <b>-2.23597</b> | cold down vs hot |
| SLC4A8    | 3.15E-06    | 9.71E-06    | 0.44666  | <b>-2.23914</b> | cold down vs hot |
| MSX2P1    | 5.12E-07    | 1.77E-06    | 0.446224 | <b>-2.24103</b> | cold down vs hot |
| PLA2G5    | 0.00054885  | 0.00106327  | 0.44595  | <b>-2.2424</b>  | cold down vs hot |
| CLSTN3    | 4.36E-09    | 1.86E-08    | 0.445612 | <b>-2.24411</b> | cold down vs hot |
| ZNF671    | 3.34E-10    | 1.57E-09    | 0.445558 | <b>-2.24438</b> | cold down vs hot |
| RELB      | 2.50E-23    | 2.08E-22    | 0.445371 | <b>-2.24532</b> | cold down vs hot |
| RPH3A     | 0.00426149  | 0.00620417  | 0.445208 | <b>-2.24614</b> | cold down vs hot |
| SCPEP1    | 2.10E-20    | 1.60E-19    | 0.445102 | <b>-2.24667</b> | cold down vs hot |
| C1RL      | 2.14E-11    | 1.09E-10    | 0.444495 | <b>-2.24974</b> | cold down vs hot |
| C2orf65   | 6.38E-08    | 2.44E-07    | 0.44446  | <b>-2.24992</b> | cold down vs hot |
| C6orf27   | 1.47E-07    | 5.39E-07    | 0.444409 | <b>-2.25018</b> | cold down vs hot |
| C17orf72  | 8.78E-11    | 4.30E-10    | 0.444288 | <b>-2.25079</b> | cold down vs hot |
| ISLR      | 5.51E-06    | 1.64E-05    | 0.444042 | <b>-2.25204</b> | cold down vs hot |
| LXN       | 8.80E-09    | 3.65E-08    | 0.444027 | <b>-2.25212</b> | cold down vs hot |
| COL23A1   | 8.35E-07    | 2.81E-06    | 0.443134 | <b>-2.25665</b> | cold down vs hot |
| CLDN5     | 4.37E-08    | 1.70E-07    | 0.442715 | <b>-2.25879</b> | cold down vs hot |
| RAB31     | 6.18E-12    | 3.26E-11    | 0.442277 | <b>-2.26102</b> | cold down vs hot |
| ABCA6     | 0.00200453  | 0.00327399  | 0.442211 | <b>-2.26136</b> | cold down vs hot |
| IL23A     | 1.64E-14    | 9.71E-14    | 0.442008 | <b>-2.2624</b>  | cold down vs hot |
| ADRB2     | 4.58E-09    | 1.96E-08    | 0.441905 | <b>-2.26293</b> | cold down vs hot |
| LCN10     | 0.000576802 | 0.00110861  | 0.441779 | <b>-2.26357</b> | cold down vs hot |
| KCNJ15    | 8.44E-07    | 2.84E-06    | 0.441308 | <b>-2.26599</b> | cold down vs hot |
| FATE1     | 8.13E-08    | 3.07E-07    | 0.441222 | <b>-2.26643</b> | cold down vs hot |
| B3GNT8    | 1.93E-09    | 8.53E-09    | 0.440966 | <b>-2.26778</b> | cold down vs hot |
| LY6H      | 2.04E-05    | 5.51E-05    | 0.440331 | <b>-2.27102</b> | cold down vs hot |
| IRF4      | 0.000215187 | 0.000460778 | 0.440137 | <b>-2.27202</b> | cold down vs hot |
| ZNF467    | 5.36E-10    | 2.48E-09    | 0.438671 | <b>-2.27961</b> | cold down vs hot |
| C1orf127  | 5.83E-09    | 2.47E-08    | 0.438395 | <b>-2.28105</b> | cold down vs hot |
| SAA1      | 0.00352249  | 0.00529727  | 0.438228 | <b>-2.28192</b> | cold down vs hot |
| LRRC55    | 3.16E-05    | 8.19E-05    | 0.438133 | <b>-2.28241</b> | cold down vs hot |
| EDN1      | 5.79E-09    | 2.45E-08    | 0.437781 | <b>-2.28425</b> | cold down vs hot |
| SMOC2     | 2.59E-08    | 1.02E-07    | 0.43728  | <b>-2.28686</b> | cold down vs hot |
| EHF       | 0.00124876  | 0.00217746  | 0.436691 | <b>-2.28995</b> | cold down vs hot |
| METTL7B   | 2.71E-05    | 7.14E-05    | 0.436445 | <b>-2.29124</b> | cold down vs hot |
| F13A1     | 1.41E-05    | 3.90E-05    | 0.436251 | <b>-2.29226</b> | cold down vs hot |
| PLEKHA7   | 9.66E-08    | 3.61E-07    | 0.436076 | <b>-2.29318</b> | cold down vs hot |
| ATHL1     | 4.32E-11    | 2.17E-10    | 0.435962 | <b>-2.29378</b> | cold down vs hot |
| MGAT4A    | 1.94E-17    | 1.32E-16    | 0.435818 | <b>-2.29454</b> | cold down vs hot |
| EID3      | 7.37E-08    | 2.80E-07    | 0.435784 | <b>-2.29471</b> | cold down vs hot |
| EMID2     | 0.000228077 | 0.00048354  | 0.4355   | <b>-2.29621</b> | cold down vs hot |
| SVPEP1    | 2.19E-06    | 6.92E-06    | 0.435317 | <b>-2.29718</b> | cold down vs hot |
| VDR       | 4.52E-11    | 2.27E-10    | 0.434935 | <b>-2.29919</b> | cold down vs hot |
| ADCY4     | 9.15E-11    | 4.48E-10    | 0.43481  | <b>-2.29985</b> | cold down vs hot |
| TPK1      | 5.28E-13    | 2.93E-12    | 0.43464  | <b>-2.30076</b> | cold down vs hot |
| C11orf45  | 3.15E-10    | 1.49E-09    | 0.43464  | <b>-2.30076</b> | cold down vs hot |
| PBX4      | 1.49E-06    | 4.82E-06    | 0.43333  | <b>-2.30771</b> | cold down vs hot |
| NFKBID    | 7.11E-16    | 4.49E-15    | 0.433328 | <b>-2.30772</b> | cold down vs hot |
| XKRX      | 2.83E-06    | 8.80E-06    | 0.433215 | <b>-2.30832</b> | cold down vs hot |
| LHFPL1    | 0.000472022 | 0.000930966 | 0.433079 | <b>-2.30905</b> | cold down vs hot |
| TNFSF13   | 7.74E-16    | 4.88E-15    | 0.433008 | <b>-2.30943</b> | cold down vs hot |
| BIN1      | 1.70E-09    | 7.54E-09    | 0.432823 | <b>-2.31041</b> | cold down vs hot |
| LOC145820 | 1.41E-07    | 5.21E-07    | 0.432709 | <b>-2.31102</b> | cold down vs hot |
| SCIN      | 0.00344264  | 0.00519394  | 0.43174  | <b>-2.31621</b> | cold down vs hot |
| ASGR1     | 2.48E-08    | 9.82E-08    | 0.43156  | <b>-2.31717</b> | cold down vs hot |
| BARX2     | 0.00116518  | 0.00205366  | 0.431135 | <b>-2.31946</b> | cold down vs hot |
| NPB       | 9.98E-06    | 2.84E-05    | 0.430715 | <b>-2.32172</b> | cold down vs hot |
| LGMN      | 1.86E-22    | 1.51E-21    | 0.430698 | <b>-2.32181</b> | cold down vs hot |
| LRRN3     | 0.000118662 | 0.000274246 | 0.430489 | <b>-2.32294</b> | cold down vs hot |
| MGAT3     | 9.83E-07    | 3.28E-06    | 0.430277 | <b>-2.32408</b> | cold down vs hot |
| ME3       | 8.84E-06    | 2.54E-05    | 0.429473 | <b>-2.32844</b> | cold down vs hot |
| SPNS2     | 3.98E-12    | 2.12E-11    | 0.42947  | <b>-2.32845</b> | cold down vs hot |
| ARHGFB3   | 4.55E-20    | 3.44E-19    | 0.42898  | <b>-2.33111</b> | cold down vs hot |
| SYNPO2    | 1.29E-06    | 4.22E-06    | 0.428637 | <b>-2.33298</b> | cold down vs hot |
| EFCAB4A   | 4.38E-08    | 1.70E-07    | 0.428312 | <b>-2.33475</b> | cold down vs hot |
| HHEX      | 5.62E-09    | 2.38E-08    | 0.428257 | <b>-2.33504</b> | cold down vs hot |
| TRIM21    | 4.43E-28    | 4.39E-27    | 0.428245 | <b>-2.33511</b> | cold down vs hot |
| MTMR8     | 5.17E-06    | 1.54E-05    | 0.427186 | <b>-2.3409</b>  | cold down vs hot |
| GUCY1A3   | 1.33E-10    | 6.45E-10    | 0.426931 | <b>-2.3423</b>  | cold down vs hot |

|           |             |             |          |                 |                  |
|-----------|-------------|-------------|----------|-----------------|------------------|
| CHST13    | 3.84E-08    | 1.50E-07    | 0.426764 | <b>-2.34321</b> | cold down vs hot |
| SELM      | 3.16E-07    | 1.11E-06    | 0.426708 | <b>-2.34352</b> | cold down vs hot |
| FRMPD1    | 0.000116741 | 0.000270475 | 0.426703 | <b>-2.34355</b> | cold down vs hot |
| CDH11     | 1.03E-06    | 3.42E-06    | 0.426543 | <b>-2.34443</b> | cold down vs hot |
| RHO       | 3.19E-09    | 1.38E-08    | 0.42625  | <b>-2.34604</b> | cold down vs hot |
| SH3D20    | 9.01E-10    | 4.08E-09    | 0.426178 | <b>-2.34644</b> | cold down vs hot |
| PARM1     | 6.38E-09    | 2.69E-08    | 0.42602  | <b>-2.34731</b> | cold down vs hot |
| B3GALT4   | 1.89E-15    | 1.16E-14    | 0.425706 | <b>-2.34904</b> | cold down vs hot |
| PHEX      | 2.82E-05    | 7.38E-05    | 0.425336 | <b>-2.35108</b> | cold down vs hot |
| CDC42SE2  | 2.44E-30    | 2.63E-29    | 0.424991 | <b>-2.35299</b> | cold down vs hot |
| LOC440461 | 5.76E-09    | 2.44E-08    | 0.424927 | <b>-2.35334</b> | cold down vs hot |
| TCTEX1D1  | 7.63E-05    | 0.000183748 | 0.424502 | <b>-2.3557</b>  | cold down vs hot |
| FAS       | 3.67E-11    | 1.86E-10    | 0.424344 | <b>-2.35658</b> | cold down vs hot |
| CDCP1     | 0.000249788 | 0.00052539  | 0.424325 | <b>-2.35669</b> | cold down vs hot |
| BATF3     | 4.97E-11    | 2.49E-10    | 0.424127 | <b>-2.35778</b> | cold down vs hot |
| RAB33A    | 3.47E-06    | 1.06E-05    | 0.424073 | <b>-2.35808</b> | cold down vs hot |
| TMEM200A  | 1.00E-07    | 3.73E-07    | 0.423941 | <b>-2.35882</b> | cold down vs hot |
| MAP3K5    | 1.22E-12    | 6.66E-12    | 0.422747 | <b>-2.36548</b> | cold down vs hot |
| TNFSF15   | 6.79E-06    | 1.98E-05    | 0.422657 | <b>-2.36599</b> | cold down vs hot |
| RAB42     | 8.30E-12    | 4.33E-11    | 0.422547 | <b>-2.3666</b>  | cold down vs hot |
| LYPD5     | 1.28E-07    | 4.74E-07    | 0.422306 | <b>-2.36795</b> | cold down vs hot |
| TSHZ2     | 1.11E-06    | 3.66E-06    | 0.421977 | <b>-2.3698</b>  | cold down vs hot |
| RUNX3     | 7.85E-07    | 2.65E-06    | 0.421342 | <b>-2.37337</b> | cold down vs hot |
| OR2A7     | 0.000273944 | 0.000571227 | 0.420969 | <b>-2.37547</b> | cold down vs hot |
| BCL3      | 1.49E-17    | 1.03E-16    | 0.420492 | <b>-2.37817</b> | cold down vs hot |
| PTPLAD2   | 6.19E-10    | 2.84E-09    | 0.42     | <b>-2.38095</b> | cold down vs hot |
| TAPBP     | 1.31E-26    | 1.25E-25    | 0.419089 | <b>-2.38613</b> | cold down vs hot |
| CYSLTR2   | 0.000212931 | 0.000456397 | 0.418962 | <b>-2.38685</b> | cold down vs hot |
| FCGR3B    | 2.33E-05    | 6.21E-05    | 0.41881  | <b>-2.38772</b> | cold down vs hot |
| NPL       | 4.40E-17    | 2.95E-16    | 0.418535 | <b>-2.38929</b> | cold down vs hot |
| HIST1H2BG | 1.31E-05    | 3.65E-05    | 0.418157 | <b>-2.39144</b> | cold down vs hot |
| IRF7      | 1.11E-12    | 6.04E-12    | 0.417913 | <b>-2.39284</b> | cold down vs hot |
| RTP4      | 1.02E-11    | 5.34E-11    | 0.417696 | <b>-2.39408</b> | cold down vs hot |
| XPNPEP2   | 5.42E-05    | 0.000134712 | 0.417636 | <b>-2.39443</b> | cold down vs hot |
| CD207     | 3.09E-06    | 9.57E-06    | 0.417094 | <b>-2.39754</b> | cold down vs hot |
| RILPL2    | 2.39E-26    | 2.25E-25    | 0.41703  | <b>-2.39791</b> | cold down vs hot |
| SORL1     | 9.17E-06    | 2.63E-05    | 0.416978 | <b>-2.39821</b> | cold down vs hot |
| CXorf65   | 3.37E-06    | 1.03E-05    | 0.416926 | <b>-2.39851</b> | cold down vs hot |
| PION      | 3.60E-09    | 1.55E-08    | 0.41672  | <b>-2.39969</b> | cold down vs hot |
| JAKMIP2   | 0.00071649  | 0.00134299  | 0.416281 | <b>-2.40223</b> | cold down vs hot |
| BHLHE22   | 9.42E-05    | 0.000222217 | 0.415638 | <b>-2.40594</b> | cold down vs hot |
| SLCO2A1   | 7.83E-09    | 3.27E-08    | 0.415241 | <b>-2.40824</b> | cold down vs hot |
| ACSS3     | 0.0021356   | 0.00345264  | 0.415064 | <b>-2.40927</b> | cold down vs hot |
| LAMA3     | 1.65E-06    | 5.33E-06    | 0.414766 | <b>-2.411</b>   | cold down vs hot |
| KIAA1644  | 0.000127947 | 0.000292595 | 0.414561 | <b>-2.41219</b> | cold down vs hot |
| VIPR2     | 9.51E-05    | 0.000224044 | 0.414509 | <b>-2.41249</b> | cold down vs hot |
| GLDC      | 0.000383718 | 0.000771409 | 0.414121 | <b>-2.41475</b> | cold down vs hot |
| LGI2      | 1.07E-07    | 3.98E-07    | 0.413595 | <b>-2.41782</b> | cold down vs hot |
| REM1      | 2.93E-05    | 7.64E-05    | 0.413495 | <b>-2.41841</b> | cold down vs hot |
| UBE2QL1   | 3.35E-06    | 1.03E-05    | 0.412766 | <b>-2.42268</b> | cold down vs hot |
| FMOD      | 7.13E-05    | 0.000173041 | 0.412614 | <b>-2.42357</b> | cold down vs hot |
| COL8A2    | 9.85E-09    | 4.06E-08    | 0.412323 | <b>-2.42528</b> | cold down vs hot |
| HOOK1     | 0.00145232  | 0.00247877  | 0.412298 | <b>-2.42543</b> | cold down vs hot |
| HERC6     | 3.92E-11    | 1.98E-10    | 0.412024 | <b>-2.42704</b> | cold down vs hot |
| C18orf1   | 1.99E-09    | 8.78E-09    | 0.411942 | <b>-2.42753</b> | cold down vs hot |
| DACT2     | 0.000180276 | 0.000393776 | 0.411882 | <b>-2.42788</b> | cold down vs hot |
| FHAD1     | 0.000162875 | 0.000361943 | 0.41185  | <b>-2.42807</b> | cold down vs hot |
| ENPP5     | 0.000501472 | 0.000980804 | 0.411834 | <b>-2.42816</b> | cold down vs hot |
| RRAD      | 1.13E-05    | 3.20E-05    | 0.411815 | <b>-2.42828</b> | cold down vs hot |
| FFAR2     | 3.51E-08    | 1.38E-07    | 0.411771 | <b>-2.42853</b> | cold down vs hot |
| PSME2     | 9.90E-38    | 1.41E-36    | 0.411478 | <b>-2.43027</b> | cold down vs hot |
| LOXL1     | 4.92E-09    | 2.09E-08    | 0.411381 | <b>-2.43084</b> | cold down vs hot |
| EYA2      | 1.25E-07    | 4.63E-07    | 0.411297 | <b>-2.43133</b> | cold down vs hot |
| ICAM1     | 4.08E-15    | 2.48E-14    | 0.411061 | <b>-2.43273</b> | cold down vs hot |
| SFRP4     | 0.00194245  | 0.00318297  | 0.410924 | <b>-2.43354</b> | cold down vs hot |
| LOC154761 | 1.88E-10    | 9.03E-10    | 0.410691 | <b>-2.43492</b> | cold down vs hot |
| POMC      | 8.61E-05    | 0.000204475 | 0.410666 | <b>-2.43507</b> | cold down vs hot |
| S1PR1     | 2.77E-16    | 1.80E-15    | 0.410542 | <b>-2.43581</b> | cold down vs hot |
| TEKT5     | 0.00363242  | 0.00543378  | 0.410221 | <b>-2.43771</b> | cold down vs hot |
| ALDH1A1   | 5.78E-06    | 1.71E-05    | 0.409815 | <b>-2.44013</b> | cold down vs hot |
| SLCSA5    | 1.03E-08    | 4.25E-08    | 0.409681 | <b>-2.44092</b> | cold down vs hot |
| CD82      | 3.45E-10    | 1.63E-09    | 0.409674 | <b>-2.44097</b> | cold down vs hot |
| TM6SF1    | 2.22E-17    | 1.51E-16    | 0.409445 | <b>-2.44233</b> | cold down vs hot |
| GALNTL1   | 1.50E-06    | 4.85E-06    | 0.409175 | <b>-2.44394</b> | cold down vs hot |
| TLR1      | 1.57E-13    | 8.92E-13    | 0.408523 | <b>-2.44784</b> | cold down vs hot |
| CABP4     | 6.89E-05    | 0.000167495 | 0.4084   | <b>-2.44858</b> | cold down vs hot |
| NCEH1     | 1.71E-14    | 1.02E-13    | 0.408336 | <b>-2.44897</b> | cold down vs hot |

|          |             |             |          |                 |                  |
|----------|-------------|-------------|----------|-----------------|------------------|
| WNT5B    | 4.27E-08    | 1.66E-07    | 0.408216 | <b>-2.44969</b> | cold down vs hot |
| SLC2A9   | 5.61E-11    | 2.80E-10    | 0.407717 | <b>-2.45268</b> | cold down vs hot |
| COX7A1   | 9.72E-07    | 3.24E-06    | 0.407695 | <b>-2.45281</b> | cold down vs hot |
| FFAR3    | 4.27E-09    | 1.83E-08    | 0.407686 | <b>-2.45287</b> | cold down vs hot |
| CLECSA   | 4.26E-06    | 1.29E-05    | 0.407102 | <b>-2.45639</b> | cold down vs hot |
| DTX3L    | 5.08E-22    | 4.07E-21    | 0.406473 | <b>-2.46019</b> | cold down vs hot |
| EPHX2    | 3.27E-05    | 8.45E-05    | 0.406144 | <b>-2.46218</b> | cold down vs hot |
| HS3ST2   | 0.000156995 | 0.000350428 | 0.406031 | <b>-2.46287</b> | cold down vs hot |
| NAIP     | 5.22E-12    | 2.76E-11    | 0.405716 | <b>-2.46478</b> | cold down vs hot |
| ZNF334   | 0.000555737 | 0.00107502  | 0.405213 | <b>-2.46784</b> | cold down vs hot |
| NNMT     | 5.07E-07    | 1.75E-06    | 0.404934 | <b>-2.46954</b> | cold down vs hot |
| GPR133   | 9.03E-06    | 2.59E-05    | 0.404364 | <b>-2.47302</b> | cold down vs hot |
| SAMD12   | 5.78E-05    | 0.000142773 | 0.404267 | <b>-2.47361</b> | cold down vs hot |
| OR2A9P   | 2.52E-05    | 6.68E-05    | 0.403621 | <b>-2.47757</b> | cold down vs hot |
| TLR3     | 1.14E-09    | 5.16E-09    | 0.403451 | <b>-2.47861</b> | cold down vs hot |
| PLAU     | 1.48E-09    | 6.60E-09    | 0.403358 | <b>-2.47919</b> | cold down vs hot |
| DSC2     | 9.53E-08    | 3.57E-07    | 0.403215 | <b>-2.48007</b> | cold down vs hot |
| CEBPD    | 1.51E-14    | 8.99E-14    | 0.403144 | <b>-2.4805</b>  | cold down vs hot |
| DRAM1    | 3.35E-25    | 3.00E-24    | 0.402853 | <b>-2.48229</b> | cold down vs hot |
| LRRK2    | 1.72E-07    | 6.28E-07    | 0.402644 | <b>-2.48358</b> | cold down vs hot |
| CXCL2    | 1.26E-05    | 3.52E-05    | 0.402527 | <b>-2.4843</b>  | cold down vs hot |
| OAS3     | 1.86E-12    | 1.01E-11    | 0.402364 | <b>-2.48531</b> | cold down vs hot |
| CCL11    | 9.17E-05    | 0.000216803 | 0.402184 | <b>-2.48642</b> | cold down vs hot |
| HPSE     | 1.89E-12    | 1.02E-11    | 0.402034 | <b>-2.48735</b> | cold down vs hot |
| FOXF1    | 5.68E-06    | 1.68E-05    | 0.401973 | <b>-2.48773</b> | cold down vs hot |
| CARNS1   | 4.62E-10    | 2.15E-09    | 0.401935 | <b>-2.48796</b> | cold down vs hot |
| BTN3A2   | 8.44E-20    | 6.34E-19    | 0.401702 | <b>-2.48941</b> | cold down vs hot |
| ARHGEF6  | 4.43E-10    | 2.06E-09    | 0.401689 | <b>-2.48949</b> | cold down vs hot |
| GIPC2    | 1.13E-09    | 5.07E-09    | 0.401019 | <b>-2.49365</b> | cold down vs hot |
| SLC29A3  | 2.57E-22    | 2.07E-21    | 0.400446 | <b>-2.49721</b> | cold down vs hot |
| DHX58    | 8.21E-18    | 5.71E-17    | 0.400402 | <b>-2.49749</b> | cold down vs hot |
| STRA6    | 0.000532727 | 0.00103542  | 0.399891 | <b>-2.50068</b> | cold down vs hot |
| GPR35    | 2.03E-16    | 1.33E-15    | 0.399806 | <b>-2.50121</b> | cold down vs hot |
| KLRG1    | 1.05E-16    | 6.95E-16    | 0.399716 | <b>-2.50178</b> | cold down vs hot |
| L3MBTL4  | 8.02E-06    | 2.32E-05    | 0.398735 | <b>-2.50793</b> | cold down vs hot |
| CYBA     | 1.85E-17    | 1.26E-16    | 0.398721 | <b>-2.50802</b> | cold down vs hot |
| WIPF1    | 8.47E-13    | 4.66E-12    | 0.398212 | <b>-2.51122</b> | cold down vs hot |
| KLF2     | 5.43E-16    | 3.46E-15    | 0.398159 | <b>-2.51156</b> | cold down vs hot |
| MAP1LC3C | 4.80E-06    | 1.44E-05    | 0.397936 | <b>-2.51297</b> | cold down vs hot |
| ENPP6    | 4.55E-06    | 1.37E-05    | 0.397741 | <b>-2.5142</b>  | cold down vs hot |
| PNMAL2   | 5.30E-11    | 2.64E-10    | 0.397457 | <b>-2.516</b>   | cold down vs hot |
| ARL4C    | 4.60E-14    | 2.67E-13    | 0.39739  | <b>-2.51642</b> | cold down vs hot |
| IL24     | 2.12E-05    | 5.71E-05    | 0.397141 | <b>-2.518</b>   | cold down vs hot |
| KIF17    | 0.000234606 | 0.000496497 | 0.39642  | <b>-2.52258</b> | cold down vs hot |
| NCCRP1   | 0.000194728 | 0.000421254 | 0.396108 | <b>-2.52457</b> | cold down vs hot |
| IQGAP2   | 9.58E-09    | 3.96E-08    | 0.395825 | <b>-2.52637</b> | cold down vs hot |
| IFIT2    | 7.25E-14    | 4.17E-13    | 0.395499 | <b>-2.52845</b> | cold down vs hot |
| TTC39B   | 5.52E-10    | 2.55E-09    | 0.395352 | <b>-2.52939</b> | cold down vs hot |
| TAP2     | 4.28E-24    | 3.69E-23    | 0.395238 | <b>-2.53012</b> | cold down vs hot |
| IRAK2    | 9.56E-13    | 5.24E-12    | 0.395117 | <b>-2.53089</b> | cold down vs hot |
| CRHBP    | 5.28E-08    | 2.04E-07    | 0.395083 | <b>-2.53112</b> | cold down vs hot |
| DGKG     | 1.24E-09    | 5.56E-09    | 0.395077 | <b>-2.53116</b> | cold down vs hot |
| SLC37A2  | 2.26E-13    | 1.27E-12    | 0.395051 | <b>-2.53132</b> | cold down vs hot |
| KCNQ1    | 4.73E-17    | 3.17E-16    | 0.394552 | <b>-2.53452</b> | cold down vs hot |
| CLIC6    | 7.57E-07    | 2.56E-06    | 0.394429 | <b>-2.53531</b> | cold down vs hot |
| GGTLC2   | 4.76E-09    | 2.03E-08    | 0.394257 | <b>-2.53642</b> | cold down vs hot |
| NKX3-1   | 2.96E-05    | 7.72E-05    | 0.394226 | <b>-2.53662</b> | cold down vs hot |
| BHMT2    | 0.000265289 | 0.000554742 | 0.394072 | <b>-2.53761</b> | cold down vs hot |
| GSDMB    | 6.86E-10    | 3.14E-09    | 0.394009 | <b>-2.53801</b> | cold down vs hot |
| PDGFRA   | 1.43E-07    | 5.26E-07    | 0.393541 | <b>-2.54103</b> | cold down vs hot |
| ALS2CL   | 7.28E-10    | 3.33E-09    | 0.393508 | <b>-2.54124</b> | cold down vs hot |
| RASAL1   | 0.00169842  | 0.00283505  | 0.39348  | <b>-2.54142</b> | cold down vs hot |
| P2RY2    | 7.42E-08    | 2.82E-07    | 0.393275 | <b>-2.54275</b> | cold down vs hot |
| HS3ST3B1 | 1.45E-07    | 5.35E-07    | 0.393134 | <b>-2.54366</b> | cold down vs hot |
| ADAM19   | 3.16E-08    | 1.24E-07    | 0.393082 | <b>-2.544</b>   | cold down vs hot |
| TRPC2    | 1.30E-10    | 6.34E-10    | 0.393041 | <b>-2.54426</b> | cold down vs hot |
| APOL2    | 3.83E-28    | 3.82E-27    | 0.392148 | <b>-2.55006</b> | cold down vs hot |
| IFIT3    | 1.41E-13    | 7.99E-13    | 0.391949 | <b>-2.55135</b> | cold down vs hot |
| PYCARD   | 6.90E-09    | 2.90E-08    | 0.390865 | <b>-2.55843</b> | cold down vs hot |
| TICAM2   | 1.59E-14    | 9.48E-14    | 0.390794 | <b>-2.55889</b> | cold down vs hot |
| CCDC152  | 7.49E-07    | 2.54E-06    | 0.390766 | <b>-2.55908</b> | cold down vs hot |
| CTSH     | 9.97E-19    | 7.25E-18    | 0.390738 | <b>-2.55926</b> | cold down vs hot |
| NFKBIA   | 7.65E-33    | 8.93E-32    | 0.390441 | <b>-2.56121</b> | cold down vs hot |
| TXLNB    | 2.35E-08    | 9.35E-08    | 0.390272 | <b>-2.56231</b> | cold down vs hot |
| IL6      | 8.73E-07    | 2.93E-06    | 0.389971 | <b>-2.56429</b> | cold down vs hot |
| CDYL2    | 1.36E-08    | 5.54E-08    | 0.389954 | <b>-2.56441</b> | cold down vs hot |
| GRAPL    | 5.41E-09    | 2.30E-08    | 0.389502 | <b>-2.56738</b> | cold down vs hot |

|           |             |             |          |                 |                  |
|-----------|-------------|-------------|----------|-----------------|------------------|
| MYEOV     | 0.00401439  | 0.00590237  | 0.389441 | <b>-2.56779</b> | cold down vs hot |
| TFCP2L1   | 2.51E-05    | 6.66E-05    | 0.389293 | <b>-2.56876</b> | cold down vs hot |
| AGXT2L1   | 0.00343617  | 0.00518537  | 0.389122 | <b>-2.56989</b> | cold down vs hot |
| CPNE9     | 1.00E-09    | 4.54E-09    | 0.388703 | <b>-2.57266</b> | cold down vs hot |
| CH25H     | 3.59E-08    | 1.41E-07    | 0.388657 | <b>-2.57296</b> | cold down vs hot |
| PLEKHO1   | 4.02E-20    | 3.04E-19    | 0.388094 | <b>-2.5767</b>  | cold down vs hot |
| TNFSF4    | 1.65E-12    | 8.96E-12    | 0.387273 | <b>-2.58216</b> | cold down vs hot |
| RPGRIP1   | 2.13E-10    | 1.02E-09    | 0.387134 | <b>-2.58308</b> | cold down vs hot |
| ADCY7     | 1.18E-18    | 8.56E-18    | 0.387036 | <b>-2.58374</b> | cold down vs hot |
| POM121L9  | 4.19E-10    | 1.95E-09    | 0.386627 | <b>-2.58647</b> | cold down vs hot |
| ASS1      | 1.46E-07    | 5.37E-07    | 0.386069 | <b>-2.59021</b> | cold down vs hot |
| RRN3P2    | 7.18E-12    | 3.76E-11    | 0.385916 | <b>-2.59124</b> | cold down vs hot |
| PCBP3     | 2.43E-07    | 8.70E-07    | 0.385776 | <b>-2.59218</b> | cold down vs hot |
| DES       | 0.00118453  | 0.00208156  | 0.385239 | <b>-2.59579</b> | cold down vs hot |
| ADAMTSL3  | 1.07E-08    | 4.38E-08    | 0.384572 | <b>-2.60029</b> | cold down vs hot |
| ERP27     | 1.40E-05    | 3.89E-05    | 0.384163 | <b>-2.60306</b> | cold down vs hot |
| IL1RN     | 1.16E-08    | 4.73E-08    | 0.383705 | <b>-2.60617</b> | cold down vs hot |
| TAPBPL    | 9.55E-24    | 8.09E-23    | 0.382637 | <b>-2.61344</b> | cold down vs hot |
| DGKA      | 3.77E-16    | 2.42E-15    | 0.382163 | <b>-2.61669</b> | cold down vs hot |
| DHRS3     | 2.82E-12    | 1.51E-11    | 0.381563 | <b>-2.6208</b>  | cold down vs hot |
| KIAA0040  | 4.06E-10    | 1.90E-09    | 0.38102  | <b>-2.62453</b> | cold down vs hot |
| LOC339535 | 0.000989089 | 0.00178377  | 0.380816 | <b>-2.62594</b> | cold down vs hot |
| TRAF1     | 1.51E-07    | 5.54E-07    | 0.380366 | <b>-2.62905</b> | cold down vs hot |
| RAI2      | 9.61E-14    | 5.51E-13    | 0.380318 | <b>-2.62938</b> | cold down vs hot |
| ARNTL2    | 1.33E-05    | 3.71E-05    | 0.380143 | <b>-2.63059</b> | cold down vs hot |
| TMEM163   | 0.00141501  | 0.00242206  | 0.379901 | <b>-2.63227</b> | cold down vs hot |
| C6orf105  | 2.06E-08    | 8.25E-08    | 0.379725 | <b>-2.63348</b> | cold down vs hot |
| CXorf42   | 6.31E-07    | 2.16E-06    | 0.3797   | <b>-2.63366</b> | cold down vs hot |
| GPX3      | 8.30E-09    | 3.45E-08    | 0.379457 | <b>-2.63534</b> | cold down vs hot |
| ARHGAP4   | 1.63E-14    | 9.70E-14    | 0.379271 | <b>-2.63664</b> | cold down vs hot |
| CPXM2     | 3.90E-05    | 9.96E-05    | 0.378977 | <b>-2.63868</b> | cold down vs hot |
| ITGA4     | 7.46E-07    | 2.53E-06    | 0.378477 | <b>-2.64217</b> | cold down vs hot |
| NAAA      | 7.55E-19    | 5.53E-18    | 0.377482 | <b>-2.64913</b> | cold down vs hot |
| PIGR      | 5.97E-06    | 1.76E-05    | 0.377472 | <b>-2.6492</b>  | cold down vs hot |
| MYB       | 2.75E-11    | 1.40E-10    | 0.377156 | <b>-2.65142</b> | cold down vs hot |
| FAM101A   | 1.01E-06    | 3.36E-06    | 0.376972 | <b>-2.65272</b> | cold down vs hot |
| LMTK3     | 9.01E-09    | 3.73E-08    | 0.375724 | <b>-2.66153</b> | cold down vs hot |
| CYFIP2    | 2.42E-11    | 1.24E-10    | 0.375424 | <b>-2.66365</b> | cold down vs hot |
| IGF1      | 4.51E-08    | 1.75E-07    | 0.37492  | <b>-2.66724</b> | cold down vs hot |
| HLA-L     | 1.21E-16    | 7.97E-16    | 0.374594 | <b>-2.66956</b> | cold down vs hot |
| CNR1      | 0.00039792  | 0.000798122 | 0.374577 | <b>-2.66968</b> | cold down vs hot |
| GBGT1     | 3.01E-16    | 1.94E-15    | 0.374564 | <b>-2.66977</b> | cold down vs hot |
| GPR88     | 8.19E-09    | 3.41E-08    | 0.374278 | <b>-2.67181</b> | cold down vs hot |
| ESR1      | 4.19E-11    | 2.11E-10    | 0.374216 | <b>-2.67226</b> | cold down vs hot |
| DDX60     | 9.39E-13    | 5.15E-12    | 0.373991 | <b>-2.67386</b> | cold down vs hot |
| LOC653786 | 1.06E-08    | 4.35E-08    | 0.373814 | <b>-2.67513</b> | cold down vs hot |
| SOCS3     | 4.66E-14    | 2.71E-13    | 0.373381 | <b>-2.67823</b> | cold down vs hot |
| TTC7A     | 6.50E-33    | 7.64E-32    | 0.373159 | <b>-2.67982</b> | cold down vs hot |
| ACHE      | 2.03E-09    | 8.95E-09    | 0.373115 | <b>-2.68014</b> | cold down vs hot |
| TLR5      | 3.73E-19    | 2.75E-18    | 0.372917 | <b>-2.68156</b> | cold down vs hot |
| LUM       | 8.03E-08    | 3.04E-07    | 0.372895 | <b>-2.68172</b> | cold down vs hot |
| LPXN      | 1.92E-14    | 1.13E-13    | 0.372713 | <b>-2.68303</b> | cold down vs hot |
| FCN3      | 1.77E-09    | 7.85E-09    | 0.372477 | <b>-2.68473</b> | cold down vs hot |
| GPR77     | 5.38E-14    | 3.12E-13    | 0.37231  | <b>-2.68594</b> | cold down vs hot |
| SCARA5    | 0.00016029  | 0.000356808 | 0.371385 | <b>-2.69262</b> | cold down vs hot |
| NR1H3     | 4.74E-27    | 4.58E-26    | 0.371259 | <b>-2.69354</b> | cold down vs hot |
| BTN3A1    | 3.81E-25    | 3.40E-24    | 0.370744 | <b>-2.69728</b> | cold down vs hot |
| PKP2      | 9.32E-05    | 0.000220022 | 0.3707   | <b>-2.6976</b>  | cold down vs hot |
| DOCK11    | 6.15E-15    | 3.71E-14    | 0.369701 | <b>-2.70489</b> | cold down vs hot |
| C1orf106  | 0.000289099 | 0.000599571 | 0.369454 | <b>-2.7067</b>  | cold down vs hot |
| ATP8A1    | 3.24E-07    | 1.14E-06    | 0.368797 | <b>-2.71152</b> | cold down vs hot |
| ZNF835    | 1.00E-07    | 3.73E-07    | 0.368778 | <b>-2.71166</b> | cold down vs hot |
| ABLIM1    | 2.22E-11    | 1.14E-10    | 0.368569 | <b>-2.7132</b>  | cold down vs hot |
| IL1R1     | 5.09E-14    | 2.96E-13    | 0.368546 | <b>-2.71337</b> | cold down vs hot |
| GLDN      | 2.51E-07    | 8.96E-07    | 0.368102 | <b>-2.71664</b> | cold down vs hot |
| PAPLN     | 1.59E-14    | 9.46E-14    | 0.367972 | <b>-2.7176</b>  | cold down vs hot |
| LBH       | 2.76E-17    | 1.87E-16    | 0.367532 | <b>-2.72085</b> | cold down vs hot |
| PAOX      | 9.08E-24    | 7.72E-23    | 0.366778 | <b>-2.72644</b> | cold down vs hot |
| FKBP5     | 5.03E-12    | 2.67E-11    | 0.366682 | <b>-2.72716</b> | cold down vs hot |
| FCGR2C    | 6.98E-08    | 2.66E-07    | 0.366548 | <b>-2.72816</b> | cold down vs hot |
| SCUBE2    | 0.000562157 | 0.00108422  | 0.366527 | <b>-2.72831</b> | cold down vs hot |
| SLC17A9   | 4.50E-06    | 1.35E-05    | 0.366087 | <b>-2.73159</b> | cold down vs hot |
| TDRD9     | 0.00415174  | 0.00606876  | 0.366039 | <b>-2.73195</b> | cold down vs hot |
| CD101     | 1.01E-18    | 7.36E-18    | 0.365924 | <b>-2.7328</b>  | cold down vs hot |
| SSTR2     | 7.86E-19    | 5.74E-18    | 0.365877 | <b>-2.73316</b> | cold down vs hot |
| CERKL     | 6.53E-09    | 2.75E-08    | 0.365556 | <b>-2.73556</b> | cold down vs hot |
| PLCXD3    | 0.000169536 | 0.00037344  | 0.365446 | <b>-2.73638</b> | cold down vs hot |

|           |             |             |          |                 |                  |
|-----------|-------------|-------------|----------|-----------------|------------------|
| RAMP3     | 2.24E-15    | 1.37E-14    | 0.365357 | <b>-2.73705</b> | cold down vs hot |
| ALPL      | 3.79E-13    | 2.11E-12    | 0.365235 | <b>-2.73796</b> | cold down vs hot |
| FAIM2     | 2.04E-08    | 8.16E-08    | 0.365035 | <b>-2.73946</b> | cold down vs hot |
| RNASSET2  | 9.02E-27    | 8.63E-26    | 0.3648   | <b>-2.74123</b> | cold down vs hot |
| SMPD3     | 4.87E-18    | 3.40E-17    | 0.364554 | <b>-2.74308</b> | cold down vs hot |
| NINJ2     | 6.44E-15    | 3.88E-14    | 0.364263 | <b>-2.74527</b> | cold down vs hot |
| ITIH4     | 7.95E-10    | 3.62E-09    | 0.363683 | <b>-2.74965</b> | cold down vs hot |
| FILIP1L   | 1.54E-15    | 9.58E-15    | 0.36348  | <b>-2.75118</b> | cold down vs hot |
| SYNGR3    | 1.62E-09    | 7.20E-09    | 0.363353 | <b>-2.75214</b> | cold down vs hot |
| SLC31A2   | 4.07E-26    | 3.79E-25    | 0.362692 | <b>-2.75716</b> | cold down vs hot |
| SLC24A4   | 0.000180957 | 0.000394866 | 0.362492 | <b>-2.75868</b> | cold down vs hot |
| PARP9     | 5.80E-24    | 4.97E-23    | 0.362234 | <b>-2.76065</b> | cold down vs hot |
| STAR      | 7.52E-10    | 3.43E-09    | 0.361995 | <b>-2.76247</b> | cold down vs hot |
| FAM107A   | 9.58E-15    | 5.75E-14    | 0.361745 | <b>-2.76438</b> | cold down vs hot |
| NMI       | 3.99E-21    | 3.10E-20    | 0.361459 | <b>-2.76656</b> | cold down vs hot |
| GGT1      | 1.53E-09    | 6.83E-09    | 0.36145  | <b>-2.76664</b> | cold down vs hot |
| TMEM90B   | 3.32E-06    | 1.02E-05    | 0.361356 | <b>-2.76735</b> | cold down vs hot |
| C6orf150  | 1.90E-11    | 9.78E-11    | 0.360757 | <b>-2.77195</b> | cold down vs hot |
| VMO1      | 1.94E-09    | 8.58E-09    | 0.360728 | <b>-2.77217</b> | cold down vs hot |
| RASGRP3   | 6.20E-17    | 4.13E-16    | 0.360392 | <b>-2.77475</b> | cold down vs hot |
| SOD2      | 2.22E-27    | 2.17E-26    | 0.360365 | <b>-2.77496</b> | cold down vs hot |
| ZG16B     | 1.85E-07    | 6.73E-07    | 0.360359 | <b>-2.77501</b> | cold down vs hot |
| TNFRSF10A | 2.49E-07    | 8.90E-07    | 0.360135 | <b>-2.77673</b> | cold down vs hot |
| LSR       | 2.27E-09    | 9.93E-09    | 0.359743 | <b>-2.77977</b> | cold down vs hot |
| BMX       | 0.000624529 | 0.00119145  | 0.35969  | <b>-2.78017</b> | cold down vs hot |
| MICB      | 2.60E-12    | 1.40E-11    | 0.359603 | <b>-2.78085</b> | cold down vs hot |
| PGM5      | 7.70E-08    | 2.92E-07    | 0.359165 | <b>-2.78424</b> | cold down vs hot |
| LPAR1     | 4.01E-06    | 1.22E-05    | 0.359156 | <b>-2.78431</b> | cold down vs hot |
| SULF1     | 2.92E-08    | 1.15E-07    | 0.359005 | <b>-2.78547</b> | cold down vs hot |
| FAM129A   | 1.95E-08    | 7.84E-08    | 0.359004 | <b>-2.78548</b> | cold down vs hot |
| LRRC15    | 0.00037088  | 0.000748025 | 0.358576 | <b>-2.78881</b> | cold down vs hot |
| PTGFR     | 1.29E-06    | 4.22E-06    | 0.358459 | <b>-2.78972</b> | cold down vs hot |
| HMOX1     | 4.67E-16    | 2.99E-15    | 0.357651 | <b>-2.79602</b> | cold down vs hot |
| NKAPL     | 4.58E-09    | 1.96E-08    | 0.356933 | <b>-2.80165</b> | cold down vs hot |
| IL16      | 5.54E-15    | 3.35E-14    | 0.356729 | <b>-2.80325</b> | cold down vs hot |
| C10orf10  | 5.23E-14    | 3.03E-13    | 0.356692 | <b>-2.80354</b> | cold down vs hot |
| APOC1     | 9.99E-09    | 4.12E-08    | 0.356669 | <b>-2.80372</b> | cold down vs hot |
| CAMK4     | 2.96E-06    | 9.19E-06    | 0.356593 | <b>-2.80432</b> | cold down vs hot |
| CD68      | 3.35E-21    | 2.60E-20    | 0.356452 | <b>-2.80543</b> | cold down vs hot |
| ZNF154    | 4.18E-12    | 2.23E-11    | 0.356211 | <b>-2.80733</b> | cold down vs hot |
| UNC5A     | 2.77E-08    | 1.09E-07    | 0.356113 | <b>-2.8081</b>  | cold down vs hot |
| CLEC4G    | 9.79E-06    | 2.79E-05    | 0.356025 | <b>-2.80879</b> | cold down vs hot |
| MS4A14    | 9.17E-15    | 5.50E-14    | 0.355895 | <b>-2.80982</b> | cold down vs hot |
| STAB1     | 3.64E-19    | 2.69E-18    | 0.355731 | <b>-2.81112</b> | cold down vs hot |
| RAB20     | 2.30E-16    | 1.49E-15    | 0.355057 | <b>-2.81645</b> | cold down vs hot |
| KAL1      | 1.50E-09    | 6.67E-09    | 0.354674 | <b>-2.81949</b> | cold down vs hot |
| FGF7      | 2.59E-10    | 1.23E-09    | 0.354212 | <b>-2.82317</b> | cold down vs hot |
| CEBPE     | 2.44E-14    | 1.43E-13    | 0.354124 | <b>-2.82387</b> | cold down vs hot |
| GOLGA2B   | 1.59E-13    | 8.99E-13    | 0.353945 | <b>-2.8253</b>  | cold down vs hot |
| IFIH1     | 2.51E-16    | 1.63E-15    | 0.353831 | <b>-2.82621</b> | cold down vs hot |
| CD300LB   | 2.67E-14    | 1.57E-13    | 0.353495 | <b>-2.82889</b> | cold down vs hot |
| CLEC1A    | 1.40E-07    | 5.18E-07    | 0.352827 | <b>-2.83425</b> | cold down vs hot |
| ARAP2     | 3.91E-13    | 2.18E-12    | 0.352802 | <b>-2.83445</b> | cold down vs hot |
| TP73      | 2.08E-07    | 7.52E-07    | 0.352173 | <b>-2.83951</b> | cold down vs hot |
| F5        | 9.17E-05    | 0.000216793 | 0.352127 | <b>-2.83988</b> | cold down vs hot |
| LYL1      | 3.19E-19    | 2.36E-18    | 0.352066 | <b>-2.84038</b> | cold down vs hot |
| FAM115C   | 1.01E-14    | 6.05E-14    | 0.352049 | <b>-2.84052</b> | cold down vs hot |
| GYLTL1B   | 2.69E-05    | 7.08E-05    | 0.351671 | <b>-2.84357</b> | cold down vs hot |
| GLIPR2    | 1.40E-24    | 1.23E-23    | 0.351321 | <b>-2.8464</b>  | cold down vs hot |
| CD163L1   | 6.65E-08    | 2.54E-07    | 0.350868 | <b>-2.85007</b> | cold down vs hot |
| COL29A1   | 9.23E-06    | 2.64E-05    | 0.350736 | <b>-2.85115</b> | cold down vs hot |
| DTX1      | 9.54E-09    | 3.94E-08    | 0.350444 | <b>-2.85352</b> | cold down vs hot |
| PTPRE     | 1.78E-14    | 1.06E-13    | 0.350287 | <b>-2.8548</b>  | cold down vs hot |
| NEXN      | 1.30E-13    | 7.41E-13    | 0.350278 | <b>-2.85487</b> | cold down vs hot |
| ARHGEF5   | 3.25E-05    | 8.40E-05    | 0.350274 | <b>-2.85491</b> | cold down vs hot |
| COLQ      | 1.63E-15    | 1.01E-14    | 0.350049 | <b>-2.85674</b> | cold down vs hot |
| GP5       | 5.63E-11    | 2.80E-10    | 0.350018 | <b>-2.857</b>   | cold down vs hot |
| BEX5      | 4.41E-06    | 1.33E-05    | 0.349876 | <b>-2.85815</b> | cold down vs hot |
| TMEM63C   | 4.85E-06    | 1.45E-05    | 0.349745 | <b>-2.85923</b> | cold down vs hot |
| ELF4      | 9.73E-22    | 7.70E-21    | 0.3495   | <b>-2.86123</b> | cold down vs hot |
| FUCA1     | 3.32E-24    | 2.88E-23    | 0.349403 | <b>-2.86202</b> | cold down vs hot |
| FNDC1     | 2.01E-06    | 6.41E-06    | 0.349399 | <b>-2.86206</b> | cold down vs hot |
| DYSF      | 5.90E-22    | 4.71E-21    | 0.348865 | <b>-2.86644</b> | cold down vs hot |
| PRR5L     | 6.93E-26    | 6.43E-25    | 0.347678 | <b>-2.87623</b> | cold down vs hot |
| ICAM3     | 3.89E-37    | 5.41E-36    | 0.347577 | <b>-2.87706</b> | cold down vs hot |
| LIF       | 8.40E-05    | 0.000200272 | 0.347437 | <b>-2.87822</b> | cold down vs hot |
| GPR64     | 1.71E-05    | 4.69E-05    | 0.34735  | <b>-2.87894</b> | cold down vs hot |

|           |            |            |          |                 |                  |
|-----------|------------|------------|----------|-----------------|------------------|
| GGT5      | 2.83E-16   | 1.83E-15   | 0.346672 | <b>-2.88457</b> | cold down vs hot |
| LOC389634 | 1.24E-10   | 6.02E-10   | 0.346392 | <b>-2.88691</b> | cold down vs hot |
| METTL7A   | 3.00E-14   | 1.75E-13   | 0.346155 | <b>-2.88888</b> | cold down vs hot |
| RASSF2    | 2.30E-15   | 1.41E-14   | 0.345881 | <b>-2.89117</b> | cold down vs hot |
| HCG27     | 2.48E-14   | 1.45E-13   | 0.345656 | <b>-2.89305</b> | cold down vs hot |
| FAM78A    | 1.90E-17   | 1.30E-16   | 0.345292 | <b>-2.8961</b>  | cold down vs hot |
| KLHL14    | 3.16E-05   | 8.20E-05   | 0.345235 | <b>-2.89658</b> | cold down vs hot |
| ASB2      | 4.26E-11   | 2.15E-10   | 0.34456  | <b>-2.90225</b> | cold down vs hot |
| NAPSA     | 1.82E-10   | 8.76E-10   | 0.34341  | <b>-2.91197</b> | cold down vs hot |
| ACOXL     | 1.39E-09   | 6.22E-09   | 0.342931 | <b>-2.91604</b> | cold down vs hot |
| TPRG1     | 7.76E-13   | 4.28E-12   | 0.342436 | <b>-2.92025</b> | cold down vs hot |
| ST6GALNA4 | 8.06E-06   | 2.33E-05   | 0.342314 | <b>-2.92129</b> | cold down vs hot |
| GOS2      | 3.92E-09   | 1.69E-08   | 0.341982 | <b>-2.92413</b> | cold down vs hot |
| RGN       | 2.86E-10   | 1.35E-09   | 0.341393 | <b>-2.92917</b> | cold down vs hot |
| ACE       | 1.21E-18   | 8.75E-18   | 0.341042 | <b>-2.93219</b> | cold down vs hot |
| SLC43A2   | 1.37E-24   | 1.21E-23   | 0.340515 | <b>-2.93672</b> | cold down vs hot |
| SLC1A2    | 4.30E-08   | 1.67E-07   | 0.340344 | <b>-2.93821</b> | cold down vs hot |
| OLFM1     | 6.26E-16   | 3.97E-15   | 0.340079 | <b>-2.94049</b> | cold down vs hot |
| CSAR1     | 2.78E-16   | 1.80E-15   | 0.339872 | <b>-2.94228</b> | cold down vs hot |
| ARHGGEF35 | 1.09E-05   | 3.10E-05   | 0.339052 | <b>-2.9494</b>  | cold down vs hot |
| DOC2B     | 4.45E-08   | 1.72E-07   | 0.339039 | <b>-2.94951</b> | cold down vs hot |
| CDX1      | 4.68E-12   | 2.49E-11   | 0.339025 | <b>-2.94963</b> | cold down vs hot |
| ISG15     | 1.79E-11   | 9.24E-11   | 0.338893 | <b>-2.95078</b> | cold down vs hot |
| DEGS2     | 4.61E-09   | 1.97E-08   | 0.338812 | <b>-2.95149</b> | cold down vs hot |
| IFI35     | 1.95E-23   | 1.63E-22   | 0.338309 | <b>-2.95588</b> | cold down vs hot |
| HCG22     | 7.66E-07   | 2.59E-06   | 0.338196 | <b>-2.95686</b> | cold down vs hot |
| SP140L    | 1.34E-16   | 8.83E-16   | 0.338097 | <b>-2.95774</b> | cold down vs hot |
| S100A9    | 1.39E-09   | 6.20E-09   | 0.338085 | <b>-2.95784</b> | cold down vs hot |
| CNKSR1    | 1.00E-09   | 4.54E-09   | 0.338045 | <b>-2.95819</b> | cold down vs hot |
| NAALADL1  | 5.49E-10   | 2.54E-09   | 0.337685 | <b>-2.96134</b> | cold down vs hot |
| SLFN11    | 2.41E-14   | 1.42E-13   | 0.33753  | <b>-2.9627</b>  | cold down vs hot |
| TNFAIP8L3 | 3.64E-12   | 1.94E-11   | 0.337497 | <b>-2.96299</b> | cold down vs hot |
| TSPAN2    | 2.80E-10   | 1.33E-09   | 0.337315 | <b>-2.96459</b> | cold down vs hot |
| PIM1      | 7.57E-31   | 8.37E-30   | 0.336288 | <b>-2.97364</b> | cold down vs hot |
| GREM1     | 1.31E-06   | 4.28E-06   | 0.336277 | <b>-2.97374</b> | cold down vs hot |
| LOC647121 | 3.55E-12   | 1.90E-11   | 0.335791 | <b>-2.97804</b> | cold down vs hot |
| BATF2     | 8.03E-19   | 5.85E-18   | 0.335755 | <b>-2.97837</b> | cold down vs hot |
| GPR160    | 1.77E-21   | 1.39E-20   | 0.335721 | <b>-2.97867</b> | cold down vs hot |
| CPVL      | 3.12E-12   | 1.68E-11   | 0.33519  | <b>-2.98338</b> | cold down vs hot |
| ATF7IP2   | 1.52E-08   | 6.19E-08   | 0.33501  | <b>-2.98499</b> | cold down vs hot |
| CCL17     | 2.54E-09   | 1.11E-08   | 0.33368  | <b>-2.99689</b> | cold down vs hot |
| CPNE5     | 5.02E-10   | 2.33E-09   | 0.333672 | <b>-2.99695</b> | cold down vs hot |
| MPO       | 5.92E-12   | 3.13E-11   | 0.333544 | <b>-2.99811</b> | cold down vs hot |
| ADAP1     | 3.34E-12   | 1.79E-11   | 0.332269 | <b>-3.00961</b> | cold down vs hot |
| RNF43     | 4.43E-06   | 1.33E-05   | 0.331988 | <b>-3.01216</b> | cold down vs hot |
| FCAR      | 8.29E-11   | 4.08E-10   | 0.331077 | <b>-3.02045</b> | cold down vs hot |
| FER1L4    | 1.16E-06   | 3.83E-06   | 0.330965 | <b>-3.02147</b> | cold down vs hot |
| CD160     | 3.23E-18   | 2.27E-17   | 0.330162 | <b>-3.02882</b> | cold down vs hot |
| SARDH     | 5.41E-08   | 2.08E-07   | 0.32997  | <b>-3.03058</b> | cold down vs hot |
| LIMD2     | 7.99E-21   | 6.14E-20   | 0.329055 | <b>-3.039</b>   | cold down vs hot |
| DENND3    | 2.11E-29   | 2.18E-28   | 0.328315 | <b>-3.04585</b> | cold down vs hot |
| CXCL16    | 3.15E-24   | 2.74E-23   | 0.327964 | <b>-3.04911</b> | cold down vs hot |
| NMNAT3    | 1.00E-07   | 3.73E-07   | 0.32745  | <b>-3.0539</b>  | cold down vs hot |
| STYK1     | 1.01E-10   | 4.94E-10   | 0.32714  | <b>-3.0568</b>  | cold down vs hot |
| HAPLN3    | 1.81E-22   | 1.47E-21   | 0.32617  | <b>-3.06588</b> | cold down vs hot |
| PSMB8     | 4.17E-30   | 4.43E-29   | 0.326106 | <b>-3.06648</b> | cold down vs hot |
| PTGS1     | 1.62E-17   | 1.11E-16   | 0.325701 | <b>-3.0703</b>  | cold down vs hot |
| SMTNL1    | 1.25E-15   | 7.78E-15   | 0.325043 | <b>-3.07652</b> | cold down vs hot |
| SLC2A6    | 5.86E-15   | 3.54E-14   | 0.324555 | <b>-3.08115</b> | cold down vs hot |
| CDH1      | 0.00394461 | 0.00582298 | 0.324308 | <b>-3.08349</b> | cold down vs hot |
| CDH23     | 5.85E-14   | 3.38E-13   | 0.324007 | <b>-3.08635</b> | cold down vs hot |
| GLIPR1    | 2.27E-13   | 1.27E-12   | 0.32386  | <b>-3.08776</b> | cold down vs hot |
| CHST15    | 7.93E-26   | 7.34E-25   | 0.323239 | <b>-3.09369</b> | cold down vs hot |
| SLC35F3   | 3.47E-08   | 1.36E-07   | 0.322796 | <b>-3.09793</b> | cold down vs hot |
| GALM      | 1.53E-21   | 1.21E-20   | 0.322638 | <b>-3.09945</b> | cold down vs hot |
| RFTN1     | 3.67E-26   | 3.42E-25   | 0.322283 | <b>-3.10286</b> | cold down vs hot |
| PECAM1    | 1.30E-34   | 1.62E-33   | 0.322261 | <b>-3.10308</b> | cold down vs hot |
| DPYD      | 1.05E-12   | 5.73E-12   | 0.321458 | <b>-3.11083</b> | cold down vs hot |
| TP63      | 2.15E-08   | 8.57E-08   | 0.320899 | <b>-3.11625</b> | cold down vs hot |
| GSTM5     | 5.71E-10   | 2.63E-09   | 0.3206   | <b>-3.11916</b> | cold down vs hot |
| LOC283314 | 1.53E-14   | 9.10E-14   | 0.320272 | <b>-3.12234</b> | cold down vs hot |
| TLL1      | 7.89E-09   | 3.29E-08   | 0.319859 | <b>-3.12638</b> | cold down vs hot |
| PRSS16    | 1.24E-05   | 3.48E-05   | 0.319814 | <b>-3.12681</b> | cold down vs hot |
| NUP210    | 1.93E-10   | 9.27E-10   | 0.319728 | <b>-3.12766</b> | cold down vs hot |
| HLA-A     | 1.69E-24   | 1.48E-23   | 0.319675 | <b>-3.12818</b> | cold down vs hot |
| MLKL      | 9.06E-26   | 8.33E-25   | 0.319585 | <b>-3.12905</b> | cold down vs hot |
| ANK1      | 5.68E-11   | 2.82E-10   | 0.319547 | <b>-3.12943</b> | cold down vs hot |

|           |             |             |          |                 |                  |
|-----------|-------------|-------------|----------|-----------------|------------------|
| C1orf38   | 4.64E-25    | 4.14E-24    | 0.319021 | <b>-3.13459</b> | cold down vs hot |
| PARP14    | 9.49E-31    | 1.05E-29    | 0.31831  | <b>-3.14159</b> | cold down vs hot |
| DUSP26    | 1.72E-08    | 6.96E-08    | 0.318293 | <b>-3.14176</b> | cold down vs hot |
| OSM       | 2.70E-11    | 1.38E-10    | 0.318159 | <b>-3.14308</b> | cold down vs hot |
| FAM167B   | 3.66E-09    | 1.58E-08    | 0.318066 | <b>-3.144</b>   | cold down vs hot |
| DPP4      | 2.08E-09    | 9.13E-09    | 0.318064 | <b>-3.14402</b> | cold down vs hot |
| TCF7      | 1.15E-14    | 6.87E-14    | 0.317646 | <b>-3.14816</b> | cold down vs hot |
| MST4      | 6.54E-09    | 2.76E-08    | 0.317583 | <b>-3.14878</b> | cold down vs hot |
| BTN1A1    | 2.70E-11    | 1.38E-10    | 0.316948 | <b>-3.15509</b> | cold down vs hot |
| GPAT2     | 2.38E-08    | 9.45E-08    | 0.316883 | <b>-3.15574</b> | cold down vs hot |
| BTN3A3    | 5.53E-29    | 5.66E-28    | 0.316707 | <b>-3.15749</b> | cold down vs hot |
| CD1A      | 3.48E-07    | 1.22E-06    | 0.316457 | <b>-3.15999</b> | cold down vs hot |
| C1orf54   | 4.39E-34    | 5.39E-33    | 0.316005 | <b>-3.16451</b> | cold down vs hot |
| CSF1      | 1.49E-23    | 1.25E-22    | 0.315998 | <b>-3.16458</b> | cold down vs hot |
| SH2D3C    | 3.07E-28    | 3.08E-27    | 0.315578 | <b>-3.16879</b> | cold down vs hot |
| APOBEC3F  | 2.22E-17    | 1.51E-16    | 0.315426 | <b>-3.17031</b> | cold down vs hot |
| ODF3B     | 9.14E-22    | 7.24E-21    | 0.315311 | <b>-3.17147</b> | cold down vs hot |
| MFSD7     | 2.95E-14    | 1.72E-13    | 0.315127 | <b>-3.17333</b> | cold down vs hot |
| TNFAIP3   | 2.17E-21    | 1.70E-20    | 0.31508  | <b>-3.1738</b>  | cold down vs hot |
| PRKCH     | 4.04E-28    | 4.03E-27    | 0.314906 | <b>-3.17555</b> | cold down vs hot |
| GALNT6    | 6.57E-12    | 3.45E-11    | 0.314504 | <b>-3.17961</b> | cold down vs hot |
| MAFB      | 7.93E-28    | 7.84E-27    | 0.314472 | <b>-3.17993</b> | cold down vs hot |
| ICAM4     | 1.44E-09    | 6.44E-09    | 0.314126 | <b>-3.18343</b> | cold down vs hot |
| CFH       | 4.34E-15    | 2.63E-14    | 0.314095 | <b>-3.18375</b> | cold down vs hot |
| KBTD8     | 1.11E-16    | 7.33E-16    | 0.313455 | <b>-3.19026</b> | cold down vs hot |
| ENPP4     | 1.04E-08    | 4.26E-08    | 0.313178 | <b>-3.19307</b> | cold down vs hot |
| GLRX      | 6.74E-30    | 7.11E-29    | 0.312747 | <b>-3.19747</b> | cold down vs hot |
| FBXO6     | 3.80E-25    | 3.40E-24    | 0.312712 | <b>-3.19783</b> | cold down vs hot |
| EIF4E3    | 4.50E-16    | 2.88E-15    | 0.312526 | <b>-3.19974</b> | cold down vs hot |
| GLT1D1    | 4.28E-11    | 2.15E-10    | 0.311827 | <b>-3.20691</b> | cold down vs hot |
| TBXAS1    | 3.13E-15    | 1.92E-14    | 0.311581 | <b>-3.20944</b> | cold down vs hot |
| IQSEC3    | 2.62E-11    | 1.34E-10    | 0.311404 | <b>-3.21126</b> | cold down vs hot |
| STXBP2    | 1.15E-18    | 8.35E-18    | 0.311163 | <b>-3.21375</b> | cold down vs hot |
| MYBPC2    | 1.01E-06    | 3.37E-06    | 0.311054 | <b>-3.21487</b> | cold down vs hot |
| ABP1      | 3.38E-11    | 1.71E-10    | 0.311039 | <b>-3.21503</b> | cold down vs hot |
| KCNMB1    | 1.98E-18    | 1.41E-17    | 0.310785 | <b>-3.21766</b> | cold down vs hot |
| TGM2      | 1.53E-18    | 1.10E-17    | 0.310023 | <b>-3.22556</b> | cold down vs hot |
| C17orf28  | 3.53E-16    | 2.28E-15    | 0.309547 | <b>-3.23052</b> | cold down vs hot |
| TXK       | 7.74E-11    | 3.81E-10    | 0.309369 | <b>-3.23238</b> | cold down vs hot |
| PLCXD2    | 8.87E-16    | 5.58E-15    | 0.308968 | <b>-3.23658</b> | cold down vs hot |
| TREML1    | 1.06E-13    | 6.05E-13    | 0.30894  | <b>-3.23687</b> | cold down vs hot |
| CDHR1     | 3.74E-07    | 1.31E-06    | 0.30892  | <b>-3.23709</b> | cold down vs hot |
| TLR2      | 2.28E-17    | 1.55E-16    | 0.308452 | <b>-3.242</b>   | cold down vs hot |
| SLCO5A1   | 5.16E-07    | 1.78E-06    | 0.308116 | <b>-3.24553</b> | cold down vs hot |
| CNTNAP2   | 2.34E-07    | 8.39E-07    | 0.307383 | <b>-3.25327</b> | cold down vs hot |
| NAT8B     | 3.68E-16    | 2.37E-15    | 0.307192 | <b>-3.25529</b> | cold down vs hot |
| KCNMA1    | 6.94E-09    | 2.91E-08    | 0.307005 | <b>-3.25727</b> | cold down vs hot |
| FAM107B   | 2.47E-20    | 1.88E-19    | 0.30674  | <b>-3.26008</b> | cold down vs hot |
| LRRC4C    | 1.63E-09    | 7.26E-09    | 0.30667  | <b>-3.26084</b> | cold down vs hot |
| SDS       | 2.76E-11    | 1.40E-10    | 0.306517 | <b>-3.26246</b> | cold down vs hot |
| PSMB10    | 8.85E-42    | 1.50E-40    | 0.306349 | <b>-3.26425</b> | cold down vs hot |
| PLBD1     | 2.33E-11    | 1.19E-10    | 0.306315 | <b>-3.26461</b> | cold down vs hot |
| MEF2B     | 4.17E-15    | 2.54E-14    | 0.306158 | <b>-3.26629</b> | cold down vs hot |
| LRG1      | 9.17E-11    | 4.49E-10    | 0.30515  | <b>-3.27708</b> | cold down vs hot |
| ADORA3    | 2.19E-20    | 1.67E-19    | 0.304784 | <b>-3.28101</b> | cold down vs hot |
| BST2      | 2.47E-14    | 1.45E-13    | 0.304562 | <b>-3.28341</b> | cold down vs hot |
| TNFRSF4   | 2.23E-13    | 1.25E-12    | 0.30446  | <b>-3.2845</b>  | cold down vs hot |
| DUSP2     | 7.33E-22    | 5.83E-21    | 0.303269 | <b>-3.29741</b> | cold down vs hot |
| TRIM69    | 6.27E-21    | 4.83E-20    | 0.30288  | <b>-3.30163</b> | cold down vs hot |
| PLA2G2A   | 0.000356216 | 0.000721795 | 0.302683 | <b>-3.30379</b> | cold down vs hot |
| CYP2S1    | 1.66E-18    | 1.19E-17    | 0.302556 | <b>-3.30517</b> | cold down vs hot |
| ICOSLG    | 3.21E-18    | 2.27E-17    | 0.302225 | <b>-3.3088</b>  | cold down vs hot |
| CCL23     | 5.77E-10    | 2.65E-09    | 0.302037 | <b>-3.31085</b> | cold down vs hot |
| CLIC5     | 4.47E-22    | 3.59E-21    | 0.301752 | <b>-3.31398</b> | cold down vs hot |
| PTGIR     | 2.05E-23    | 1.71E-22    | 0.301268 | <b>-3.3193</b>  | cold down vs hot |
| PLCL2     | 5.11E-21    | 3.95E-20    | 0.301061 | <b>-3.32159</b> | cold down vs hot |
| ERMN      | 2.98E-11    | 1.52E-10    | 0.300625 | <b>-3.3264</b>  | cold down vs hot |
| PLCB2     | 2.62E-20    | 1.99E-19    | 0.300078 | <b>-3.33246</b> | cold down vs hot |
| LOC100272 | 3.83E-18    | 2.69E-17    | 0.299659 | <b>-3.33713</b> | cold down vs hot |
| VAV3      | 8.71E-11    | 4.28E-10    | 0.298796 | <b>-3.34676</b> | cold down vs hot |
| SDK1      | 1.26E-09    | 5.67E-09    | 0.298782 | <b>-3.34692</b> | cold down vs hot |
| NEURL3    | 2.63E-11    | 1.34E-10    | 0.298659 | <b>-3.3483</b>  | cold down vs hot |
| BTG2      | 1.26E-30    | 1.38E-29    | 0.298514 | <b>-3.34992</b> | cold down vs hot |
| VOPP1     | 2.01E-22    | 1.62E-21    | 0.298274 | <b>-3.35262</b> | cold down vs hot |
| LIPG      | 2.23E-10    | 1.06E-09    | 0.297671 | <b>-3.35942</b> | cold down vs hot |
| NPY1R     | 1.79E-05    | 4.86E-05    | 0.297514 | <b>-3.36119</b> | cold down vs hot |
| SEPP1     | 4.19E-13    | 2.33E-12    | 0.297419 | <b>-3.36225</b> | cold down vs hot |

|           |          |          |          |                 |                  |
|-----------|----------|----------|----------|-----------------|------------------|
| HLA-E     | 2.68E-40 | 4.32E-39 | 0.29691  | <b>-3.36802</b> | cold down vs hot |
| SLC1A3    | 9.90E-16 | 6.21E-15 | 0.295068 | <b>-3.38905</b> | cold down vs hot |
| GRAMD1B   | 5.03E-11 | 2.52E-10 | 0.294849 | <b>-3.39157</b> | cold down vs hot |
| ACRBP     | 1.14E-22 | 9.26E-22 | 0.294613 | <b>-3.39428</b> | cold down vs hot |
| EVL       | 9.73E-30 | 1.02E-28 | 0.294598 | <b>-3.39445</b> | cold down vs hot |
| CCDC109B  | 2.93E-20 | 2.23E-19 | 0.294274 | <b>-3.39819</b> | cold down vs hot |
| MYO1A     | 3.50E-18 | 2.46E-17 | 0.293981 | <b>-3.40158</b> | cold down vs hot |
| LRRN2     | 5.66E-09 | 2.40E-08 | 0.293067 | <b>-3.41219</b> | cold down vs hot |
| HMHA1     | 7.15E-29 | 7.29E-28 | 0.292961 | <b>-3.41342</b> | cold down vs hot |
| ME1       | 5.40E-10 | 2.50E-09 | 0.29277  | <b>-3.41565</b> | cold down vs hot |
| MPP7      | 2.13E-10 | 1.02E-09 | 0.29263  | <b>-3.41729</b> | cold down vs hot |
| LGR6      | 4.14E-11 | 2.09E-10 | 0.292596 | <b>-3.41768</b> | cold down vs hot |
| RAMP1     | 3.28E-06 | 1.01E-05 | 0.292543 | <b>-3.4183</b>  | cold down vs hot |
| IL3RA     | 9.20E-28 | 9.06E-27 | 0.292288 | <b>-3.42128</b> | cold down vs hot |
| CMPK2     | 3.69E-18 | 2.60E-17 | 0.291251 | <b>-3.43346</b> | cold down vs hot |
| FLVCR2    | 1.69E-29 | 1.76E-28 | 0.290565 | <b>-3.44157</b> | cold down vs hot |
| VAMP5     | 9.44E-24 | 8.02E-23 | 0.290387 | <b>-3.44368</b> | cold down vs hot |
| C11orf75  | 3.35E-33 | 3.97E-32 | 0.290282 | <b>-3.44492</b> | cold down vs hot |
| TMEM130   | 1.25E-09 | 5.63E-09 | 0.28978  | <b>-3.45089</b> | cold down vs hot |
| AQP9      | 3.07E-09 | 1.33E-08 | 0.289562 | <b>-3.45349</b> | cold down vs hot |
| ANKRD55   | 8.35E-15 | 5.02E-14 | 0.289172 | <b>-3.45815</b> | cold down vs hot |
| CYP4F22   | 1.11E-08 | 4.56E-08 | 0.289084 | <b>-3.4592</b>  | cold down vs hot |
| BTBD11    | 4.78E-12 | 2.54E-11 | 0.289067 | <b>-3.4594</b>  | cold down vs hot |
| MAL       | 1.13E-05 | 3.20E-05 | 0.289052 | <b>-3.45958</b> | cold down vs hot |
| WARS      | 7.33E-23 | 6.02E-22 | 0.288611 | <b>-3.46487</b> | cold down vs hot |
| C20orf118 | 3.09E-24 | 2.69E-23 | 0.288528 | <b>-3.46587</b> | cold down vs hot |
| SEPT6     | 2.64E-28 | 2.66E-27 | 0.288195 | <b>-3.46987</b> | cold down vs hot |
| LMO2      | 1.29E-32 | 1.48E-31 | 0.288138 | <b>-3.47056</b> | cold down vs hot |
| BFSF2     | 6.29E-07 | 2.15E-06 | 0.288046 | <b>-3.47167</b> | cold down vs hot |
| IKZF2     | 1.36E-16 | 8.90E-16 | 0.287965 | <b>-3.47265</b> | cold down vs hot |
| ANKRD35   | 3.67E-14 | 2.14E-13 | 0.287877 | <b>-3.47371</b> | cold down vs hot |
| HLA-H     | 8.01E-26 | 7.41E-25 | 0.28738  | <b>-3.47972</b> | cold down vs hot |
| BIK       | 4.24E-08 | 1.65E-07 | 0.287158 | <b>-3.48241</b> | cold down vs hot |
| KCNK6     | 1.09E-25 | 9.93E-25 | 0.286951 | <b>-3.48492</b> | cold down vs hot |
| FCGR2B    | 2.05E-16 | 1.34E-15 | 0.286904 | <b>-3.48549</b> | cold down vs hot |
| HAR1A     | 9.54E-11 | 4.66E-10 | 0.286813 | <b>-3.48659</b> | cold down vs hot |
| CRYBB1    | 2.56E-23 | 2.13E-22 | 0.285691 | <b>-3.50028</b> | cold down vs hot |
| RIC3      | 5.66E-08 | 2.17E-07 | 0.285347 | <b>-3.5045</b>  | cold down vs hot |
| STK17B    | 5.37E-22 | 4.29E-21 | 0.285272 | <b>-3.50543</b> | cold down vs hot |
| KLRC3     | 1.81E-08 | 7.29E-08 | 0.28428  | <b>-3.51766</b> | cold down vs hot |
| CGNL1     | 1.31E-09 | 5.87E-09 | 0.284196 | <b>-3.5187</b>  | cold down vs hot |
| S100A8    | 2.76E-08 | 1.09E-07 | 0.284083 | <b>-3.5201</b>  | cold down vs hot |
| FGF1      | 6.31E-10 | 2.89E-09 | 0.283995 | <b>-3.52119</b> | cold down vs hot |
| SLC46A3   | 2.79E-21 | 2.18E-20 | 0.283452 | <b>-3.52794</b> | cold down vs hot |
| GCOM1     | 1.12E-13 | 6.39E-13 | 0.283103 | <b>-3.53228</b> | cold down vs hot |
| PLB1      | 5.81E-17 | 3.87E-16 | 0.282573 | <b>-3.53891</b> | cold down vs hot |
| TNFRSF11B | 2.90E-09 | 1.26E-08 | 0.282466 | <b>-3.54025</b> | cold down vs hot |
| GSDMA     | 4.32E-10 | 2.01E-09 | 0.282095 | <b>-3.5449</b>  | cold down vs hot |
| MYCL1     | 4.34E-23 | 3.59E-22 | 0.28132  | <b>-3.55467</b> | cold down vs hot |
| PIPOX     | 5.38E-26 | 5.00E-25 | 0.281186 | <b>-3.55637</b> | cold down vs hot |
| MYO5B     | 7.62E-06 | 2.21E-05 | 0.28073  | <b>-3.56214</b> | cold down vs hot |
| RASGRP4   | 3.80E-22 | 3.06E-21 | 0.279873 | <b>-3.57305</b> | cold down vs hot |
| APOBEC3A  | 9.72E-17 | 6.44E-16 | 0.278703 | <b>-3.58805</b> | cold down vs hot |
| TMEM154   | 3.26E-14 | 1.90E-13 | 0.278528 | <b>-3.59031</b> | cold down vs hot |
| GRAP2     | 4.86E-15 | 2.95E-14 | 0.278312 | <b>-3.5931</b>  | cold down vs hot |
| TMEM149   | 2.17E-38 | 3.15E-37 | 0.278298 | <b>-3.59327</b> | cold down vs hot |
| TAS1R3    | 3.79E-15 | 2.31E-14 | 0.278134 | <b>-3.59539</b> | cold down vs hot |
| SPTA1     | 8.45E-07 | 2.84E-06 | 0.277576 | <b>-3.60262</b> | cold down vs hot |
| FAM20A    | 7.13E-14 | 4.11E-13 | 0.2774   | <b>-3.6049</b>  | cold down vs hot |
| TSPAN33   | 1.03E-25 | 9.45E-25 | 0.277227 | <b>-3.60715</b> | cold down vs hot |
| PARP12    | 5.38E-31 | 5.97E-30 | 0.277015 | <b>-3.60991</b> | cold down vs hot |
| CRIP1     | 7.16E-20 | 5.40E-19 | 0.276788 | <b>-3.61288</b> | cold down vs hot |
| RGS1      | 4.79E-09 | 2.04E-08 | 0.276702 | <b>-3.614</b>   | cold down vs hot |
| VIPR1     | 2.24E-10 | 1.07E-09 | 0.276658 | <b>-3.61458</b> | cold down vs hot |
| CARD16    | 4.75E-13 | 2.63E-12 | 0.276621 | <b>-3.61505</b> | cold down vs hot |
| TLR4      | 1.80E-18 | 1.28E-17 | 0.276604 | <b>-3.61528</b> | cold down vs hot |
| ZNF804A   | 6.17E-12 | 3.26E-11 | 0.276372 | <b>-3.61831</b> | cold down vs hot |
| MAN1A1    | 1.63E-17 | 1.12E-16 | 0.276357 | <b>-3.61851</b> | cold down vs hot |
| CFD       | 1.79E-16 | 1.17E-15 | 0.275227 | <b>-3.63336</b> | cold down vs hot |
| UBE2L6    | 1.23E-33 | 1.48E-32 | 0.2752   | <b>-3.63373</b> | cold down vs hot |
| PTPRN2    | 1.58E-21 | 1.25E-20 | 0.274363 | <b>-3.6448</b>  | cold down vs hot |
| CRB2      | 6.15E-12 | 3.25E-11 | 0.273718 | <b>-3.65339</b> | cold down vs hot |
| TREM2     | 1.82E-18 | 1.30E-17 | 0.273372 | <b>-3.65802</b> | cold down vs hot |
| LTC4S     | 1.49E-15 | 9.24E-15 | 0.273295 | <b>-3.65905</b> | cold down vs hot |
| CX3CR1    | 3.39E-15 | 2.07E-14 | 0.273261 | <b>-3.65951</b> | cold down vs hot |
| ITGAX     | 1.95E-27 | 1.90E-26 | 0.27156  | <b>-3.68243</b> | cold down vs hot |
| SERPINF2  | 5.33E-25 | 4.74E-24 | 0.271148 | <b>-3.68802</b> | cold down vs hot |

|           |             |             |          |                 |                  |
|-----------|-------------|-------------|----------|-----------------|------------------|
| P2RX5     | 1.00E-20    | 7.70E-20    | 0.270915 | <b>-3.69119</b> | cold down vs hot |
| C5orf39   | 2.51E-32    | 2.85E-31    | 0.270748 | <b>-3.69347</b> | cold down vs hot |
| GNA14     | 1.68E-09    | 7.47E-09    | 0.270604 | <b>-3.69544</b> | cold down vs hot |
| TMEM119   | 1.32E-15    | 8.23E-15    | 0.270513 | <b>-3.69667</b> | cold down vs hot |
| SLFN13    | 6.72E-18    | 4.68E-17    | 0.270333 | <b>-3.69915</b> | cold down vs hot |
| PLXDC2    | 1.02E-18    | 7.38E-18    | 0.268941 | <b>-3.71829</b> | cold down vs hot |
| ISG20     | 2.10E-14    | 1.23E-13    | 0.268661 | <b>-3.72216</b> | cold down vs hot |
| EOMES     | 1.10E-15    | 6.91E-15    | 0.268627 | <b>-3.72264</b> | cold down vs hot |
| ST14      | 8.41E-18    | 5.82E-17    | 0.268553 | <b>-3.72366</b> | cold down vs hot |
| SAMHD1    | 1.16E-26    | 1.10E-25    | 0.268046 | <b>-3.7307</b>  | cold down vs hot |
| FAM70A    | 1.83E-06    | 5.86E-06    | 0.267911 | <b>-3.73258</b> | cold down vs hot |
| KIF21B    | 3.24E-17    | 2.19E-16    | 0.267242 | <b>-3.74193</b> | cold down vs hot |
| LAMC2     | 6.90E-09    | 2.90E-08    | 0.267225 | <b>-3.74217</b> | cold down vs hot |
| ARHGAP27  | 8.25E-40    | 1.28E-38    | 0.267158 | <b>-3.74311</b> | cold down vs hot |
| SIGLEC12  | 1.32E-07    | 4.88E-07    | 0.267047 | <b>-3.74467</b> | cold down vs hot |
| MX1       | 1.62E-15    | 1.01E-14    | 0.266522 | <b>-3.75203</b> | cold down vs hot |
| BZRAP1    | 5.77E-10    | 2.65E-09    | 0.266236 | <b>-3.75606</b> | cold down vs hot |
| IL1R2     | 7.50E-14    | 4.31E-13    | 0.265638 | <b>-3.76452</b> | cold down vs hot |
| PIK3IP1   | 1.24E-35    | 1.60E-34    | 0.265517 | <b>-3.76624</b> | cold down vs hot |
| MSR1      | 1.50E-18    | 1.08E-17    | 0.265291 | <b>-3.76944</b> | cold down vs hot |
| FERMT3    | 2.79E-20    | 2.12E-19    | 0.264702 | <b>-3.77783</b> | cold down vs hot |
| CST2      | 0.000317573 | 0.000651791 | 0.264624 | <b>-3.77894</b> | cold down vs hot |
| STAT1     | 1.10E-34    | 1.38E-33    | 0.264461 | <b>-3.78128</b> | cold down vs hot |
| C6orf97   | 7.30E-20    | 5.49E-19    | 0.263935 | <b>-3.78881</b> | cold down vs hot |
| EVI2A     | 5.60E-17    | 3.74E-16    | 0.263178 | <b>-3.79971</b> | cold down vs hot |
| B2M       | 1.63E-37    | 2.31E-36    | 0.263036 | <b>-3.80176</b> | cold down vs hot |
| TTBK1     | 4.11E-16    | 2.63E-15    | 0.262976 | <b>-3.80264</b> | cold down vs hot |
| OXER1     | 1.15E-17    | 7.93E-17    | 0.261862 | <b>-3.8188</b>  | cold down vs hot |
| UBA7      | 1.59E-30    | 1.72E-29    | 0.261495 | <b>-3.82416</b> | cold down vs hot |
| KLRF1     | 1.67E-13    | 9.43E-13    | 0.261263 | <b>-3.82755</b> | cold down vs hot |
| IFITM1    | 9.73E-19    | 7.09E-18    | 0.260964 | <b>-3.83195</b> | cold down vs hot |
| STAB2     | 8.06E-08    | 3.05E-07    | 0.260233 | <b>-3.84271</b> | cold down vs hot |
| GPR34     | 2.61E-18    | 1.84E-17    | 0.260118 | <b>-3.84441</b> | cold down vs hot |
| GPR55     | 2.49E-13    | 1.39E-12    | 0.260075 | <b>-3.84504</b> | cold down vs hot |
| BASP1     | 2.78E-26    | 2.60E-25    | 0.259543 | <b>-3.85293</b> | cold down vs hot |
| APOBEC3D  | 1.87E-25    | 1.68E-24    | 0.25945  | <b>-3.85431</b> | cold down vs hot |
| C19orf35  | 6.83E-23    | 5.62E-22    | 0.259205 | <b>-3.85794</b> | cold down vs hot |
| CCL7      | 8.05E-09    | 3.35E-08    | 0.258462 | <b>-3.86905</b> | cold down vs hot |
| NTNG2     | 5.47E-16    | 3.48E-15    | 0.258347 | <b>-3.87076</b> | cold down vs hot |
| CCL14     | 1.05E-09    | 4.75E-09    | 0.258312 | <b>-3.87129</b> | cold down vs hot |
| OAS1      | 1.94E-22    | 1.58E-21    | 0.258141 | <b>-3.87386</b> | cold down vs hot |
| NLRP3     | 3.12E-25    | 2.80E-24    | 0.257785 | <b>-3.8792</b>  | cold down vs hot |
| MGC12916  | 1.31E-13    | 7.45E-13    | 0.257392 | <b>-3.88513</b> | cold down vs hot |
| CCR1      | 9.39E-28    | 9.23E-27    | 0.257316 | <b>-3.88627</b> | cold down vs hot |
| FOLR2     | 4.80E-21    | 3.71E-20    | 0.257049 | <b>-3.89032</b> | cold down vs hot |
| TNFRSF13C | 7.08E-16    | 4.47E-15    | 0.255152 | <b>-3.91924</b> | cold down vs hot |
| NUDT16P1  | 2.76E-18    | 1.95E-17    | 0.254945 | <b>-3.92241</b> | cold down vs hot |
| CD22      | 1.87E-10    | 8.99E-10    | 0.254755 | <b>-3.92534</b> | cold down vs hot |
| TRPM2     | 3.11E-21    | 2.42E-20    | 0.254673 | <b>-3.9266</b>  | cold down vs hot |
| EFEMP1    | 6.34E-16    | 4.01E-15    | 0.254159 | <b>-3.93454</b> | cold down vs hot |
| MAP3K8    | 2.78E-25    | 2.50E-24    | 0.253431 | <b>-3.94584</b> | cold down vs hot |
| LIPC      | 1.18E-12    | 6.43E-12    | 0.253084 | <b>-3.95126</b> | cold down vs hot |
| ADAM8     | 1.88E-18    | 1.34E-17    | 0.252917 | <b>-3.95386</b> | cold down vs hot |
| MYO7A     | 5.53E-21    | 4.27E-20    | 0.252856 | <b>-3.95482</b> | cold down vs hot |
| GCNT4     | 1.77E-12    | 9.59E-12    | 0.252764 | <b>-3.95626</b> | cold down vs hot |
| SLC40A1   | 9.64E-18    | 6.67E-17    | 0.252668 | <b>-3.95776</b> | cold down vs hot |
| FA2H      | 7.99E-11    | 3.93E-10    | 0.252644 | <b>-3.95814</b> | cold down vs hot |
| GPR109A   | 1.97E-15    | 1.21E-14    | 0.252389 | <b>-3.96214</b> | cold down vs hot |
| TDO2      | 1.18E-14    | 7.08E-14    | 0.251989 | <b>-3.96843</b> | cold down vs hot |
| PTK2B     | 0           | 0           | 0.251836 | <b>-3.97084</b> | cold down vs hot |
| ANKRD29   | 9.42E-17    | 6.25E-16    | 0.251552 | <b>-3.97533</b> | cold down vs hot |
| SLC6A12   | 4.24E-14    | 2.46E-13    | 0.251513 | <b>-3.97594</b> | cold down vs hot |
| FAM65C    | 1.60E-15    | 9.90E-15    | 0.251227 | <b>-3.98046</b> | cold down vs hot |
| CD70      | 1.74E-10    | 8.39E-10    | 0.251169 | <b>-3.98139</b> | cold down vs hot |
| MAPK13    | 4.28E-30    | 4.55E-29    | 0.251105 | <b>-3.98239</b> | cold down vs hot |
| VAMP8     | 3.64E-26    | 3.39E-25    | 0.250904 | <b>-3.98559</b> | cold down vs hot |
| CYP1B1    | 2.95E-16    | 1.90E-15    | 0.250767 | <b>-3.98777</b> | cold down vs hot |
| MACC1     | 1.12E-18    | 8.12E-18    | 0.250723 | <b>-3.98846</b> | cold down vs hot |
| ITIH3     | 1.78E-09    | 7.86E-09    | 0.250388 | <b>-3.9938</b>  | cold down vs hot |
| BSPRY     | 1.01E-12    | 5.54E-12    | 0.250263 | <b>-3.9958</b>  | cold down vs hot |
| KLK1      | 8.21E-09    | 3.42E-08    | 0.2502   | <b>-3.9968</b>  | cold down vs hot |
| TMEM37    | 1.75E-32    | 1.99E-31    | 0.25009  | <b>-3.99856</b> | cold down vs hot |
| TNNI2     | 6.04E-18    | 4.21E-17    | 0.25002  | <b>-3.99968</b> | cold down vs hot |
| EMR4P     | 2.83E-17    | 1.91E-16    | 0.24951  | <b>-4.00786</b> | cold down vs hot |
| RARRES2   | 1.04E-17    | 7.18E-17    | 0.249073 | <b>-4.01489</b> | cold down vs hot |
| DAPK2     | 1.28E-27    | 1.25E-26    | 0.248843 | <b>-4.0186</b>  | cold down vs hot |
| TACR1     | 1.48E-11    | 7.67E-11    | 0.248728 | <b>-4.02046</b> | cold down vs hot |

|           |          |          |          |                 |                  |
|-----------|----------|----------|----------|-----------------|------------------|
| HLA-C     | 7.32E-31 | 8.11E-30 | 0.248674 | <b>-4.02133</b> | cold down vs hot |
| GPR120    | 1.28E-17 | 8.81E-17 | 0.24735  | <b>-4.04286</b> | cold down vs hot |
| SIGLEC16  | 5.55E-17 | 3.71E-16 | 0.246925 | <b>-4.04981</b> | cold down vs hot |
| BCAS4     | 6.55E-35 | 8.30E-34 | 0.246317 | <b>-4.05982</b> | cold down vs hot |
| ST8SIA4   | 1.48E-25 | 1.34E-24 | 0.2462   | <b>-4.06175</b> | cold down vs hot |
| CD1D      | 8.06E-27 | 7.73E-26 | 0.245264 | <b>-4.07723</b> | cold down vs hot |
| PDE6B     | 8.33E-18 | 5.79E-17 | 0.244863 | <b>-4.08391</b> | cold down vs hot |
| NLRC4     | 4.61E-36 | 6.13E-35 | 0.244661 | <b>-4.08729</b> | cold down vs hot |
| GJD3      | 8.11E-33 | 9.44E-32 | 0.244318 | <b>-4.09303</b> | cold down vs hot |
| MS4A7     | 1.21E-25 | 1.10E-24 | 0.244108 | <b>-4.09654</b> | cold down vs hot |
| CACNA1I   | 8.19E-10 | 3.73E-09 | 0.243764 | <b>-4.10233</b> | cold down vs hot |
| OLR1      | 4.46E-10 | 2.07E-09 | 0.243712 | <b>-4.10321</b> | cold down vs hot |
| GCNT1     | 2.97E-22 | 2.40E-21 | 0.243455 | <b>-4.10754</b> | cold down vs hot |
| DDO       | 3.55E-11 | 1.79E-10 | 0.243406 | <b>-4.10836</b> | cold down vs hot |
| MMRN1     | 7.76E-10 | 3.54E-09 | 0.242823 | <b>-4.11823</b> | cold down vs hot |
| IL9R      | 3.29E-19 | 2.43E-18 | 0.242053 | <b>-4.13133</b> | cold down vs hot |
| CASP1     | 6.80E-17 | 4.52E-16 | 0.241904 | <b>-4.13387</b> | cold down vs hot |
| LOC283663 | 5.13E-16 | 3.27E-15 | 0.241642 | <b>-4.13835</b> | cold down vs hot |
| RNASE2    | 2.51E-18 | 1.78E-17 | 0.24161  | <b>-4.13891</b> | cold down vs hot |
| VSIG1     | 1.19E-15 | 7.44E-15 | 0.241246 | <b>-4.14515</b> | cold down vs hot |
| SUCNR1    | 1.09E-19 | 8.18E-19 | 0.241055 | <b>-4.14842</b> | cold down vs hot |
| INMT      | 8.53E-16 | 5.37E-15 | 0.241006 | <b>-4.14927</b> | cold down vs hot |
| C17orf60  | 7.35E-24 | 6.27E-23 | 0.240122 | <b>-4.16456</b> | cold down vs hot |
| ADORA2A   | 5.94E-36 | 7.84E-35 | 0.240015 | <b>-4.1664</b>  | cold down vs hot |
| APOC2     | 1.28E-06 | 4.18E-06 | 0.239169 | <b>-4.18114</b> | cold down vs hot |
| LYN       | 2.03E-42 | 3.53E-41 | 0.238867 | <b>-4.18644</b> | cold down vs hot |
| SRGN      | 3.07E-34 | 3.78E-33 | 0.238767 | <b>-4.18818</b> | cold down vs hot |
| GPR109B   | 3.31E-16 | 2.14E-15 | 0.238679 | <b>-4.18973</b> | cold down vs hot |
| FAM65B    | 2.32E-13 | 1.30E-12 | 0.23863  | <b>-4.19059</b> | cold down vs hot |
| MEOX1     | 8.84E-13 | 4.85E-12 | 0.237787 | <b>-4.20544</b> | cold down vs hot |
| PKD2L1    | 3.52E-17 | 2.37E-16 | 0.237668 | <b>-4.20755</b> | cold down vs hot |
| IL28RA    | 3.26E-11 | 1.65E-10 | 0.23759  | <b>-4.20893</b> | cold down vs hot |
| MYO7B     | 1.80E-10 | 8.67E-10 | 0.237466 | <b>-4.21113</b> | cold down vs hot |
| ITGAM     | 2.20E-29 | 2.28E-28 | 0.23744  | <b>-4.21158</b> | cold down vs hot |
| GRAP      | 1.66E-29 | 1.73E-28 | 0.236801 | <b>-4.22296</b> | cold down vs hot |
| CASP10    | 1.98E-39 | 3.04E-38 | 0.236733 | <b>-4.22417</b> | cold down vs hot |
| SELE      | 8.33E-11 | 4.09E-10 | 0.236583 | <b>-4.22684</b> | cold down vs hot |
| LOC100130 | 4.34E-16 | 2.78E-15 | 0.23635  | <b>-4.23101</b> | cold down vs hot |
| CES1      | 8.16E-07 | 2.75E-06 | 0.236332 | <b>-4.23133</b> | cold down vs hot |
| ABCG1     | 2.71E-28 | 2.72E-27 | 0.235946 | <b>-4.23826</b> | cold down vs hot |
| CPZ       | 2.19E-12 | 1.18E-11 | 0.235882 | <b>-4.23941</b> | cold down vs hot |
| LOC284749 | 1.89E-08 | 7.59E-08 | 0.235812 | <b>-4.24067</b> | cold down vs hot |
| EPHB2     | 9.05E-26 | 8.33E-25 | 0.235656 | <b>-4.24348</b> | cold down vs hot |
| CXCL14    | 4.90E-06 | 1.47E-05 | 0.234603 | <b>-4.26252</b> | cold down vs hot |
| TYMP      | 1.73E-29 | 1.80E-28 | 0.234261 | <b>-4.26875</b> | cold down vs hot |
| P2RY12    | 1.48E-14 | 8.84E-14 | 0.233967 | <b>-4.2741</b>  | cold down vs hot |
| SLC9A9    | 1.40E-34 | 1.74E-33 | 0.233823 | <b>-4.27675</b> | cold down vs hot |
| ADAP2     | 4.60E-40 | 7.24E-39 | 0.233641 | <b>-4.28007</b> | cold down vs hot |
| ELMO1     | 1.04E-27 | 1.02E-26 | 0.233634 | <b>-4.28019</b> | cold down vs hot |
| CUX2      | 5.66E-16 | 3.60E-15 | 0.233493 | <b>-4.28279</b> | cold down vs hot |
| ABCB1     | 1.60E-18 | 1.15E-17 | 0.233382 | <b>-4.28481</b> | cold down vs hot |
| SNAI3     | 8.33E-40 | 1.29E-38 | 0.233304 | <b>-4.28626</b> | cold down vs hot |
| AQP3      | 1.60E-14 | 9.52E-14 | 0.233099 | <b>-4.29002</b> | cold down vs hot |
| C20orf103 | 1.06E-13 | 6.08E-13 | 0.232751 | <b>-4.29643</b> | cold down vs hot |
| MMP9      | 3.20E-10 | 1.51E-09 | 0.232454 | <b>-4.30192</b> | cold down vs hot |
| PADI2     | 5.42E-13 | 3.00E-12 | 0.231863 | <b>-4.31288</b> | cold down vs hot |
| C12orf59  | 1.68E-17 | 1.15E-16 | 0.231591 | <b>-4.31796</b> | cold down vs hot |
| AKNA      | 4.20E-45 | 8.14E-44 | 0.231514 | <b>-4.3194</b>  | cold down vs hot |
| GNA15     | 1.47E-32 | 1.69E-31 | 0.231264 | <b>-4.32405</b> | cold down vs hot |
| TNFSF11   | 1.53E-11 | 7.93E-11 | 0.231225 | <b>-4.3248</b>  | cold down vs hot |
| C2orf89   | 6.91E-12 | 3.63E-11 | 0.231136 | <b>-4.32645</b> | cold down vs hot |
| AGAP2     | 4.16E-33 | 4.92E-32 | 0.231014 | <b>-4.32875</b> | cold down vs hot |
| ICAM2     | 1.63E-37 | 2.31E-36 | 0.230383 | <b>-4.34059</b> | cold down vs hot |
| FMO3      | 8.34E-18 | 5.79E-17 | 0.229472 | <b>-4.35783</b> | cold down vs hot |
| OAS2      | 1.38E-23 | 1.16E-22 | 0.229348 | <b>-4.36018</b> | cold down vs hot |
| CCL13     | 7.80E-12 | 4.07E-11 | 0.229063 | <b>-4.36561</b> | cold down vs hot |
| SEL1L3    | 1.53E-16 | 1.00E-15 | 0.228952 | <b>-4.36773</b> | cold down vs hot |
| CSTA      | 2.03E-20 | 1.55E-19 | 0.228916 | <b>-4.36842</b> | cold down vs hot |
| KCNJ5     | 7.57E-19 | 5.53E-18 | 0.228702 | <b>-4.37249</b> | cold down vs hot |
| OTOF      | 7.76E-18 | 5.40E-17 | 0.228292 | <b>-4.38036</b> | cold down vs hot |
| FLI1      | 4.12E-39 | 6.18E-38 | 0.227975 | <b>-4.38644</b> | cold down vs hot |
| PTCRA     | 2.19E-13 | 1.23E-12 | 0.227682 | <b>-4.3921</b>  | cold down vs hot |
| ADRA2A    | 1.19E-16 | 7.86E-16 | 0.227419 | <b>-4.39716</b> | cold down vs hot |
| BCL11A    | 8.53E-11 | 4.19E-10 | 0.227326 | <b>-4.39897</b> | cold down vs hot |
| P2RY14    | 2.52E-26 | 2.37E-25 | 0.226972 | <b>-4.40583</b> | cold down vs hot |
| SHISA3    | 2.08E-07 | 7.50E-07 | 0.226623 | <b>-4.41261</b> | cold down vs hot |
| LOC100240 | 3.58E-17 | 2.41E-16 | 0.226559 | <b>-4.41385</b> | cold down vs hot |

|             |          |          |          |                 |                  |
|-------------|----------|----------|----------|-----------------|------------------|
| C1R         | 1.97E-28 | 1.99E-27 | 0.226482 | <b>-4.41536</b> | cold down vs hot |
| C3AR1       | 7.89E-33 | 9.20E-32 | 0.225915 | <b>-4.42643</b> | cold down vs hot |
| PLCG2       | 1.95E-34 | 2.42E-33 | 0.225788 | <b>-4.42893</b> | cold down vs hot |
| TMPRSS13    | 7.87E-08 | 2.99E-07 | 0.225337 | <b>-4.43779</b> | cold down vs hot |
| PRDM8       | 1.12E-15 | 6.99E-15 | 0.225194 | <b>-4.44063</b> | cold down vs hot |
| ARHGDIB     | 4.07E-39 | 6.12E-38 | 0.225192 | <b>-4.44066</b> | cold down vs hot |
| TNFRSF25    | 3.57E-19 | 2.64E-18 | 0.224621 | <b>-4.45194</b> | cold down vs hot |
| KCNK13      | 9.06E-26 | 8.33E-25 | 0.224355 | <b>-4.45721</b> | cold down vs hot |
| AMPD3       | 8.26E-34 | 1.00E-32 | 0.22394  | <b>-4.46548</b> | cold down vs hot |
| SEMA4D      | 5.51E-37 | 7.63E-36 | 0.223877 | <b>-4.46674</b> | cold down vs hot |
| CCL18       | 5.29E-10 | 2.45E-09 | 0.223795 | <b>-4.46837</b> | cold down vs hot |
| CD14        | 3.93E-30 | 4.19E-29 | 0.223781 | <b>-4.46866</b> | cold down vs hot |
| SAMD9L      | 9.78E-23 | 7.97E-22 | 0.223709 | <b>-4.47008</b> | cold down vs hot |
| WNT1        | 3.45E-22 | 2.78E-21 | 0.223667 | <b>-4.47092</b> | cold down vs hot |
| TRANK1      | 6.70E-35 | 8.45E-34 | 0.223381 | <b>-4.47667</b> | cold down vs hot |
| AMIGO2      | 1.84E-15 | 1.14E-14 | 0.223264 | <b>-4.47901</b> | cold down vs hot |
| SDR42E1     | 7.38E-12 | 3.85E-11 | 0.222945 | <b>-4.48541</b> | cold down vs hot |
| IRF5        | 4.40E-42 | 7.51E-41 | 0.22293  | <b>-4.48571</b> | cold down vs hot |
| C19orf38    | 5.55E-36 | 7.37E-35 | 0.222905 | <b>-4.48622</b> | cold down vs hot |
| PDPN        | 3.75E-15 | 2.29E-14 | 0.221878 | <b>-4.50698</b> | cold down vs hot |
| MLC1        | 1.10E-08 | 4.50E-08 | 0.221811 | <b>-4.50835</b> | cold down vs hot |
| NAP1L2      | 6.24E-12 | 3.28E-11 | 0.221686 | <b>-4.51089</b> | cold down vs hot |
| FAM18A      | 1.04E-29 | 1.09E-28 | 0.221322 | <b>-4.51831</b> | cold down vs hot |
| APOB48R     | 6.04E-37 | 8.33E-36 | 0.220526 | <b>-4.53461</b> | cold down vs hot |
| SQRDL       | 4.54E-34 | 5.56E-33 | 0.220477 | <b>-4.53562</b> | cold down vs hot |
| BHLHA15     | 6.76E-15 | 4.07E-14 | 0.220057 | <b>-4.54428</b> | cold down vs hot |
| CD33        | 3.26E-26 | 3.05E-25 | 0.219834 | <b>-4.54888</b> | cold down vs hot |
| DBH         | 2.57E-21 | 2.01E-20 | 0.219719 | <b>-4.55127</b> | cold down vs hot |
| RORC        | 6.07E-09 | 2.57E-08 | 0.219638 | <b>-4.55295</b> | cold down vs hot |
| SERPING1    | 4.67E-35 | 5.96E-34 | 0.218636 | <b>-4.57381</b> | cold down vs hot |
| ERAP2       | 6.02E-11 | 2.98E-10 | 0.218577 | <b>-4.57505</b> | cold down vs hot |
| GRIN3A      | 5.64E-36 | 7.47E-35 | 0.21854  | <b>-4.57583</b> | cold down vs hot |
| KLRC2       | 5.62E-10 | 2.59E-09 | 0.218334 | <b>-4.58013</b> | cold down vs hot |
| IL1B        | 1.48E-12 | 8.08E-12 | 0.218109 | <b>-4.58486</b> | cold down vs hot |
| ZMYND15     | 6.36E-30 | 6.72E-29 | 0.218066 | <b>-4.58576</b> | cold down vs hot |
| MEFV        | 2.90E-30 | 3.10E-29 | 0.217499 | <b>-4.59772</b> | cold down vs hot |
| RBM47       | 4.23E-28 | 4.20E-27 | 0.216947 | <b>-4.60943</b> | cold down vs hot |
| RASGEF1B    | 9.74E-33 | 1.12E-31 | 0.21636  | <b>-4.62192</b> | cold down vs hot |
| FLT3LG      | 6.45E-34 | 7.85E-33 | 0.216252 | <b>-4.62423</b> | cold down vs hot |
| RASSF4      | 6.10E-40 | 9.55E-39 | 0.215076 | <b>-4.64953</b> | cold down vs hot |
| FAM49A      | 1.90E-23 | 1.59E-22 | 0.214869 | <b>-4.65401</b> | cold down vs hot |
| PROC        | 1.46E-24 | 1.28E-23 | 0.214684 | <b>-4.65802</b> | cold down vs hot |
| CD300A      | 1.01E-35 | 1.31E-34 | 0.214631 | <b>-4.65916</b> | cold down vs hot |
| MAOB        | 1.85E-07 | 6.73E-07 | 0.213898 | <b>-4.67512</b> | cold down vs hot |
| PTGDR       | 7.84E-25 | 6.94E-24 | 0.213263 | <b>-4.68904</b> | cold down vs hot |
| TTC16       | 2.59E-23 | 2.15E-22 | 0.213141 | <b>-4.69173</b> | cold down vs hot |
| C10orf54    | 6.14E-43 | 1.10E-41 | 0.212475 | <b>-4.70643</b> | cold down vs hot |
| KCNN3       | 1.61E-23 | 1.36E-22 | 0.211951 | <b>-4.71807</b> | cold down vs hot |
| CXCR4       | 7.51E-33 | 8.79E-32 | 0.211724 | <b>-4.72314</b> | cold down vs hot |
| PTPRO       | 1.33E-24 | 1.17E-23 | 0.211592 | <b>-4.72607</b> | cold down vs hot |
| ALPK2       | 1.38E-16 | 9.03E-16 | 0.211485 | <b>-4.72847</b> | cold down vs hot |
| TAP1        | 2.21E-37 | 3.11E-36 | 0.211421 | <b>-4.72989</b> | cold down vs hot |
| SLC8A1      | 3.91E-30 | 4.17E-29 | 0.211397 | <b>-4.73043</b> | cold down vs hot |
| OSCAR       | 1.61E-27 | 1.57E-26 | 0.211208 | <b>-4.73466</b> | cold down vs hot |
| TNFRSF12-TN | 2.91E-21 | 2.27E-20 | 0.211098 | <b>-4.73714</b> | cold down vs hot |
| AIM1        | 1.61E-19 | 1.20E-18 | 0.210679 | <b>-4.74655</b> | cold down vs hot |
| ACSM5       | 1.22E-18 | 8.82E-18 | 0.210632 | <b>-4.74762</b> | cold down vs hot |
| ACSL6       | 2.80E-15 | 1.72E-14 | 0.210053 | <b>-4.76071</b> | cold down vs hot |
| EPHB6       | 1.02E-18 | 7.39E-18 | 0.209805 | <b>-4.76633</b> | cold down vs hot |
| HAAO        | 1.46E-24 | 1.29E-23 | 0.209739 | <b>-4.76784</b> | cold down vs hot |
| LILRB5      | 4.14E-22 | 3.32E-21 | 0.209693 | <b>-4.76888</b> | cold down vs hot |
| CCL2        | 4.23E-28 | 4.20E-27 | 0.209476 | <b>-4.77382</b> | cold down vs hot |
| LRRRC61     | 2.71E-12 | 1.46E-11 | 0.20936  | <b>-4.77647</b> | cold down vs hot |
| OCIAD2      | 3.06E-13 | 1.71E-12 | 0.209355 | <b>-4.77656</b> | cold down vs hot |
| LTF         | 1.94E-10 | 9.29E-10 | 0.209192 | <b>-4.7803</b>  | cold down vs hot |
| GBP3        | 4.62E-20 | 3.48E-19 | 0.208698 | <b>-4.79161</b> | cold down vs hot |
| VSIG4       | 2.53E-25 | 2.28E-24 | 0.208537 | <b>-4.79531</b> | cold down vs hot |
| C10orf105   | 8.58E-28 | 8.46E-27 | 0.208458 | <b>-4.79713</b> | cold down vs hot |
| MFAP4       | 1.97E-13 | 1.11E-12 | 0.208362 | <b>-4.79935</b> | cold down vs hot |
| C5orf56     | 1.71E-42 | 2.99E-41 | 0.208125 | <b>-4.8048</b>  | cold down vs hot |
| IFI44L      | 8.20E-15 | 4.93E-14 | 0.207993 | <b>-4.80785</b> | cold down vs hot |
| MRC1        | 9.40E-20 | 7.05E-19 | 0.207734 | <b>-4.81384</b> | cold down vs hot |
| XAF1        | 2.71E-23 | 2.25E-22 | 0.20764  | <b>-4.81604</b> | cold down vs hot |
| DOK3        | 3.16E-39 | 4.79E-38 | 0.207177 | <b>-4.8268</b>  | cold down vs hot |
| RSAD2       | 1.44E-17 | 9.91E-17 | 0.20698  | <b>-4.83139</b> | cold down vs hot |
| KMO         | 2.57E-23 | 2.14E-22 | 0.206883 | <b>-4.83365</b> | cold down vs hot |
| DPEP1       | 3.88E-13 | 2.16E-12 | 0.206755 | <b>-4.83664</b> | cold down vs hot |

|           |          |          |          |                 |                  |
|-----------|----------|----------|----------|-----------------|------------------|
| TNFRSF8   | 2.61E-23 | 2.17E-22 | 0.206416 | <b>-4.84459</b> | cold down vs hot |
| MMP25     | 2.14E-24 | 1.87E-23 | 0.206121 | <b>-4.85153</b> | cold down vs hot |
| ATP8B4    | 1.02E-25 | 9.33E-25 | 0.206046 | <b>-4.85328</b> | cold down vs hot |
| EMB       | 1.52E-18 | 1.09E-17 | 0.205799 | <b>-4.85911</b> | cold down vs hot |
| RTN1      | 2.56E-17 | 1.74E-16 | 0.204854 | <b>-4.88153</b> | cold down vs hot |
| TNFAIP2   | 1.26E-44 | 2.41E-43 | 0.204708 | <b>-4.88501</b> | cold down vs hot |
| CMAH      | 9.39E-27 | 8.96E-26 | 0.204204 | <b>-4.89707</b> | cold down vs hot |
| ALDH2     | 1.30E-21 | 1.02E-20 | 0.204155 | <b>-4.89823</b> | cold down vs hot |
| LILRA2    | 1.20E-28 | 1.21E-27 | 0.204014 | <b>-4.90163</b> | cold down vs hot |
| EAF2      | 2.13E-34 | 2.63E-33 | 0.203968 | <b>-4.90273</b> | cold down vs hot |
| CSF2RA    | 4.32E-17 | 2.91E-16 | 0.20381  | <b>-4.90652</b> | cold down vs hot |
| SGPP2     | 9.08E-27 | 8.68E-26 | 0.203267 | <b>-4.91964</b> | cold down vs hot |
| REC8      | 3.72E-30 | 3.97E-29 | 0.202882 | <b>-4.92898</b> | cold down vs hot |
| SYTL3     | 1.37E-41 | 2.31E-40 | 0.202681 | <b>-4.93387</b> | cold down vs hot |
| LILRA6    | 2.01E-30 | 2.18E-29 | 0.202153 | <b>-4.94675</b> | cold down vs hot |
| SIGLEC9   | 8.19E-36 | 1.06E-34 | 0.201769 | <b>-4.95616</b> | cold down vs hot |
| CD209     | 8.95E-22 | 7.11E-21 | 0.201309 | <b>-4.96749</b> | cold down vs hot |
| AOX1      | 3.28E-15 | 2.01E-14 | 0.20103  | <b>-4.97438</b> | cold down vs hot |
| RAB39B    | 2.06E-16 | 1.34E-15 | 0.200761 | <b>-4.98104</b> | cold down vs hot |
| MCTP2     | 4.63E-13 | 2.57E-12 | 0.200424 | <b>-4.98943</b> | cold down vs hot |
| C1orf228  | 2.37E-26 | 2.23E-25 | 0.200309 | <b>-4.99228</b> | cold down vs hot |
| LPAR5     | 1.22E-36 | 1.66E-35 | 0.200235 | <b>-4.99412</b> | cold down vs hot |
| SPATC1    | 1.71E-32 | 1.96E-31 | 0.200066 | <b>-4.99834</b> | cold down vs hot |
| GAB3      | 2.44E-40 | 3.93E-39 | 0.199927 | <b>-5.00182</b> | cold down vs hot |
| IL7       | 2.93E-23 | 2.42E-22 | 0.199822 | <b>-5.00445</b> | cold down vs hot |
| TNFAIP8   | 1.40E-45 | 2.81E-44 | 0.199382 | <b>-5.01549</b> | cold down vs hot |
| PIM2      | 0        | 0        | 0.199221 | <b>-5.01954</b> | cold down vs hot |
| LILRA5    | 3.20E-26 | 2.99E-25 | 0.199157 | <b>-5.02117</b> | cold down vs hot |
| GPR68     | 1.67E-25 | 1.52E-24 | 0.199092 | <b>-5.02281</b> | cold down vs hot |
| CARD9     | 1.13E-32 | 1.30E-31 | 0.198898 | <b>-5.0277</b>  | cold down vs hot |
| LOC283070 | 7.56E-40 | 1.18E-38 | 0.198879 | <b>-5.02819</b> | cold down vs hot |
| APOBEC3G  | 2.24E-26 | 2.11E-25 | 0.198488 | <b>-5.03809</b> | cold down vs hot |
| ALOX5AP   | 3.10E-24 | 2.69E-23 | 0.198175 | <b>-5.04605</b> | cold down vs hot |
| CADM3     | 8.21E-09 | 3.42E-08 | 0.197977 | <b>-5.0511</b>  | cold down vs hot |
| GPR82     | 4.20E-22 | 3.37E-21 | 0.197842 | <b>-5.05454</b> | cold down vs hot |
| SLC38A1   | 8.12E-13 | 4.47E-12 | 0.197739 | <b>-5.05717</b> | cold down vs hot |
| VNN1      | 6.38E-24 | 5.45E-23 | 0.197472 | <b>-5.064</b>   | cold down vs hot |
| GPR141    | 1.74E-24 | 1.52E-23 | 0.197056 | <b>-5.07469</b> | cold down vs hot |
| GIMAP8    | 4.20E-45 | 8.14E-44 | 0.196557 | <b>-5.08759</b> | cold down vs hot |
| NLRP6     | 2.80E-24 | 2.45E-23 | 0.196337 | <b>-5.09329</b> | cold down vs hot |
| RNASE6    | 0        | 0        | 0.196137 | <b>-5.09847</b> | cold down vs hot |
| CLIC2     | 3.43E-24 | 2.97E-23 | 0.196072 | <b>-5.10018</b> | cold down vs hot |
| SLC38A5   | 9.70E-22 | 7.69E-21 | 0.196044 | <b>-5.1009</b>  | cold down vs hot |
| HLA-G     | 6.22E-16 | 3.95E-15 | 0.195546 | <b>-5.11388</b> | cold down vs hot |
| SERPINB9  | 1.47E-21 | 1.16E-20 | 0.195472 | <b>-5.11581</b> | cold down vs hot |
| CAPG      | 6.73E-14 | 3.88E-13 | 0.195266 | <b>-5.12121</b> | cold down vs hot |
| PSTPIP2   | 8.27E-29 | 8.41E-28 | 0.194782 | <b>-5.13394</b> | cold down vs hot |
| CCN12     | 6.55E-34 | 7.96E-33 | 0.194782 | <b>-5.13395</b> | cold down vs hot |
| C15orf48  | 3.72E-19 | 2.74E-18 | 0.1944   | <b>-5.14403</b> | cold down vs hot |
| CD163     | 1.40E-25 | 1.28E-24 | 0.194178 | <b>-5.14992</b> | cold down vs hot |
| MARCH1    | 1.85E-29 | 1.91E-28 | 0.194025 | <b>-5.15399</b> | cold down vs hot |
| APOL6     | 3.00E-36 | 4.03E-35 | 0.193831 | <b>-5.15914</b> | cold down vs hot |
| SLC2A5    | 4.16E-24 | 3.59E-23 | 0.193369 | <b>-5.17146</b> | cold down vs hot |
| CASS4     | 2.20E-28 | 2.22E-27 | 0.193357 | <b>-5.17178</b> | cold down vs hot |
| NLRP1     | 9.56E-33 | 1.11E-31 | 0.192804 | <b>-5.18661</b> | cold down vs hot |
| CHRNA1    | 1.18E-09 | 5.31E-09 | 0.192519 | <b>-5.1943</b>  | cold down vs hot |
| CETP      | 4.55E-11 | 2.28E-10 | 0.191646 | <b>-5.21795</b> | cold down vs hot |
| LCP2      | 2.46E-33 | 2.93E-32 | 0.191622 | <b>-5.21861</b> | cold down vs hot |
| UNC13D    | 3.76E-31 | 4.18E-30 | 0.19115  | <b>-5.23148</b> | cold down vs hot |
| IL10      | 9.44E-26 | 8.65E-25 | 0.190919 | <b>-5.23783</b> | cold down vs hot |
| LRRC25    | 1.10E-42 | 1.94E-41 | 0.190835 | <b>-5.24014</b> | cold down vs hot |
| MS4A4A    | 2.17E-36 | 2.93E-35 | 0.190723 | <b>-5.24321</b> | cold down vs hot |
| GADD45G   | 1.54E-19 | 1.15E-18 | 0.190602 | <b>-5.24653</b> | cold down vs hot |
| TTG9      | 4.67E-25 | 4.16E-24 | 0.190526 | <b>-5.24863</b> | cold down vs hot |
| FPR3      | 9.58E-35 | 1.20E-33 | 0.190193 | <b>-5.2578</b>  | cold down vs hot |
| IL33      | 1.10E-16 | 7.26E-16 | 0.189998 | <b>-5.26322</b> | cold down vs hot |
| CD300C    | 5.54E-34 | 6.77E-33 | 0.189775 | <b>-5.2694</b>  | cold down vs hot |
| NLR5      | 0        | 0        | 0.189712 | <b>-5.27115</b> | cold down vs hot |
| SH2D2A    | 4.55E-32 | 5.14E-31 | 0.189251 | <b>-5.284</b>   | cold down vs hot |
| FPR1      | 2.65E-26 | 2.49E-25 | 0.189246 | <b>-5.28413</b> | cold down vs hot |
| LGALS9    | 2.52E-44 | 4.77E-43 | 0.189078 | <b>-5.28884</b> | cold down vs hot |
| RIPK3     | 1.09E-34 | 1.37E-33 | 0.188808 | <b>-5.29638</b> | cold down vs hot |
| FCHO1     | 8.50E-26 | 7.85E-25 | 0.188781 | <b>-5.29715</b> | cold down vs hot |
| SLC7A7    | 0        | 0        | 0.188775 | <b>-5.2973</b>  | cold down vs hot |
| GHRL      | 1.29E-23 | 1.09E-22 | 0.188558 | <b>-5.30342</b> | cold down vs hot |
| MIAT      | 2.70E-35 | 3.48E-34 | 0.188019 | <b>-5.31862</b> | cold down vs hot |
| SH2D3A    | 1.19E-31 | 1.34E-30 | 0.187945 | <b>-5.3207</b>  | cold down vs hot |

|           |          |          |          |                 |                  |
|-----------|----------|----------|----------|-----------------|------------------|
| CCDC88C   | 7.46E-33 | 8.75E-32 | 0.187664 | <b>-5.32867</b> | cold down vs hot |
| RGS9      | 1.49E-18 | 1.07E-17 | 0.186978 | <b>-5.34823</b> | cold down vs hot |
| SEMA4A    | 0        | 0        | 0.186921 | <b>-5.34986</b> | cold down vs hot |
| LIME1     | 8.86E-38 | 1.27E-36 | 0.186412 | <b>-5.36447</b> | cold down vs hot |
| ARHGAP15  | 1.52E-26 | 1.44E-25 | 0.186311 | <b>-5.36736</b> | cold down vs hot |
| RARRES1   | 3.37E-22 | 2.72E-21 | 0.186111 | <b>-5.37314</b> | cold down vs hot |
| PIP5K1B   | 2.86E-12 | 1.54E-11 | 0.185187 | <b>-5.39995</b> | cold down vs hot |
| LGALS9C   | 3.43E-42 | 5.89E-41 | 0.184948 | <b>-5.40691</b> | cold down vs hot |
| IL34      | 1.19E-27 | 1.16E-26 | 0.184627 | <b>-5.41633</b> | cold down vs hot |
| SPINT2    | 1.11E-41 | 1.88E-40 | 0.184439 | <b>-5.42184</b> | cold down vs hot |
| GPBAR1    | 1.05E-38 | 1.54E-37 | 0.184175 | <b>-5.42963</b> | cold down vs hot |
| KYNU      | 2.12E-18 | 1.51E-17 | 0.184135 | <b>-5.4308</b>  | cold down vs hot |
| TMSL3     | 0        | 0        | 0.184131 | <b>-5.43092</b> | cold down vs hot |
| PRDM1     | 1.88E-40 | 3.05E-39 | 0.183719 | <b>-5.44308</b> | cold down vs hot |
| STAC3     | 0        | 0        | 0.18341  | <b>-5.45227</b> | cold down vs hot |
| CSF3R     | 1.01E-33 | 1.22E-32 | 0.183042 | <b>-5.46324</b> | cold down vs hot |
| CES8      | 8.74E-23 | 7.15E-22 | 0.182986 | <b>-5.46489</b> | cold down vs hot |
| KIF19     | 1.18E-26 | 1.12E-25 | 0.182981 | <b>-5.46504</b> | cold down vs hot |
| LOC100188 | 8.53E-23 | 6.98E-22 | 0.182412 | <b>-5.48209</b> | cold down vs hot |
| C7        | 1.36E-09 | 6.07E-09 | 0.182089 | <b>-5.49183</b> | cold down vs hot |
| LOC254559 | 3.64E-15 | 2.22E-14 | 0.180719 | <b>-5.53344</b> | cold down vs hot |
| PLA1A     | 4.02E-09 | 1.73E-08 | 0.180635 | <b>-5.53603</b> | cold down vs hot |
| ASGR2     | 3.43E-29 | 3.53E-28 | 0.17981  | <b>-5.56142</b> | cold down vs hot |
| TNS4      | 1.99E-15 | 1.23E-14 | 0.179272 | <b>-5.5781</b>  | cold down vs hot |
| FAM105A   | 4.99E-27 | 4.81E-26 | 0.178926 | <b>-5.5889</b>  | cold down vs hot |
| CD40      | 9.42E-39 | 1.39E-37 | 0.178818 | <b>-5.59227</b> | cold down vs hot |
| LILRB3    | 5.61E-41 | 9.24E-40 | 0.178396 | <b>-5.60552</b> | cold down vs hot |
| CSF1R     | 7.16E-37 | 9.84E-36 | 0.17832  | <b>-5.60789</b> | cold down vs hot |
| C9orf139  | 9.69E-30 | 1.02E-28 | 0.178022 | <b>-5.61729</b> | cold down vs hot |
| CEACAM4   | 8.25E-28 | 8.14E-27 | 0.177905 | <b>-5.62097</b> | cold down vs hot |
| SLC15A3   | 6.93E-40 | 1.08E-38 | 0.177303 | <b>-5.64007</b> | cold down vs hot |
| FAM46C    | 5.61E-29 | 5.73E-28 | 0.17713  | <b>-5.64558</b> | cold down vs hot |
| ILDR1     | 2.03E-23 | 1.70E-22 | 0.176877 | <b>-5.65363</b> | cold down vs hot |
| C15       | 4.99E-33 | 5.90E-32 | 0.17616  | <b>-5.67665</b> | cold down vs hot |
| CCND2     | 2.04E-34 | 2.53E-33 | 0.176087 | <b>-5.67901</b> | cold down vs hot |
| DEF6      | 2.32E-41 | 3.87E-40 | 0.176054 | <b>-5.68008</b> | cold down vs hot |
| HLA-F     | 2.23E-39 | 3.40E-38 | 0.175179 | <b>-5.70846</b> | cold down vs hot |
| GPR84     | 6.13E-25 | 5.45E-24 | 0.174922 | <b>-5.71682</b> | cold down vs hot |
| SH2D1B    | 2.10E-19 | 1.56E-18 | 0.174231 | <b>-5.7395</b>  | cold down vs hot |
| JAK3      | 3.29E-39 | 4.97E-38 | 0.173058 | <b>-5.77842</b> | cold down vs hot |
| PILRA     | 0        | 0        | 0.172679 | <b>-5.7911</b>  | cold down vs hot |
| STX11     | 2.19E-41 | 3.65E-40 | 0.172085 | <b>-5.81108</b> | cold down vs hot |
| SIGLEC11  | 1.80E-23 | 1.51E-22 | 0.172074 | <b>-5.81145</b> | cold down vs hot |
| SYK       | 7.77E-36 | 1.01E-34 | 0.170953 | <b>-5.84957</b> | cold down vs hot |
| CD28      | 8.56E-35 | 1.08E-33 | 0.170775 | <b>-5.85567</b> | cold down vs hot |
| CXCL12    | 6.61E-33 | 7.76E-32 | 0.170215 | <b>-5.87494</b> | cold down vs hot |
| LAT2      | 3.54E-42 | 6.06E-41 | 0.169204 | <b>-5.91004</b> | cold down vs hot |
| LAT       | 2.88E-29 | 2.97E-28 | 0.169088 | <b>-5.91409</b> | cold down vs hot |
| TNFRSF1B  | 0        | 0        | 0.168379 | <b>-5.93898</b> | cold down vs hot |
| C1orf200  | 6.20E-34 | 7.57E-33 | 0.167509 | <b>-5.96984</b> | cold down vs hot |
| HVCN1     | 2.02E-43 | 3.66E-42 | 0.167506 | <b>-5.96992</b> | cold down vs hot |
| CAMK1D    | 3.09E-35 | 3.96E-34 | 0.167325 | <b>-5.97638</b> | cold down vs hot |
| FPR2      | 9.46E-23 | 7.73E-22 | 0.167217 | <b>-5.98025</b> | cold down vs hot |
| FMO2      | 4.45E-23 | 3.67E-22 | 0.166965 | <b>-5.98926</b> | cold down vs hot |
| NUAK2     | 1.64E-42 | 2.87E-41 | 0.166829 | <b>-5.99416</b> | cold down vs hot |
| MATK      | 1.12E-23 | 9.51E-23 | 0.166642 | <b>-6.00088</b> | cold down vs hot |
| DPT       | 1.21E-13 | 6.89E-13 | 0.165864 | <b>-6.02903</b> | cold down vs hot |
| CMKLR1    | 9.14E-39 | 1.35E-37 | 0.165816 | <b>-6.03079</b> | cold down vs hot |
| HLA-B     | 3.18E-40 | 5.09E-39 | 0.165254 | <b>-6.05128</b> | cold down vs hot |
| CCDC88B   | 0        | 0        | 0.1648   | <b>-6.06798</b> | cold down vs hot |
| MFNG      | 0        | 0        | 0.164611 | <b>-6.07493</b> | cold down vs hot |
| IFI27     | 2.81E-17 | 1.90E-16 | 0.164474 | <b>-6.08</b>    | cold down vs hot |
| GMFG      | 7.01E-45 | 1.35E-43 | 0.16425  | <b>-6.08828</b> | cold down vs hot |
| CCDC141   | 4.64E-19 | 3.41E-18 | 0.164035 | <b>-6.09624</b> | cold down vs hot |
| NELL2     | 4.81E-18 | 3.37E-17 | 0.163775 | <b>-6.10595</b> | cold down vs hot |
| SLCO2B1   | 2.48E-38 | 3.59E-37 | 0.163741 | <b>-6.10719</b> | cold down vs hot |
| TYROBP    | 0        | 0        | 0.163305 | <b>-6.12349</b> | cold down vs hot |
| C7orf29   | 1.84E-17 | 1.26E-16 | 0.163173 | <b>-6.12846</b> | cold down vs hot |
| PTGER4    | 8.52E-43 | 1.52E-41 | 0.163168 | <b>-6.12864</b> | cold down vs hot |
| HOPX      | 1.48E-30 | 1.61E-29 | 0.162961 | <b>-6.13644</b> | cold down vs hot |
| GIMAP2    | 3.24E-40 | 5.17E-39 | 0.162942 | <b>-6.13716</b> | cold down vs hot |
| ACY3      | 8.97E-16 | 5.64E-15 | 0.16258  | <b>-6.15081</b> | cold down vs hot |
| TLR9      | 4.83E-35 | 6.16E-34 | 0.162567 | <b>-6.1513</b>  | cold down vs hot |
| CLEC4A    | 8.27E-43 | 1.48E-41 | 0.162137 | <b>-6.16762</b> | cold down vs hot |
| GCH1      | 0        | 0        | 0.161603 | <b>-6.18799</b> | cold down vs hot |
| PDE6G     | 6.47E-22 | 5.16E-21 | 0.161284 | <b>-6.20024</b> | cold down vs hot |
| SMPDL3B   | 2.00E-14 | 1.18E-13 | 0.160884 | <b>-6.21564</b> | cold down vs hot |

|           |          |          |          |          |                  |
|-----------|----------|----------|----------|----------|------------------|
| PIK3R5    | 0        | 0        | 0.160746 | -6.22101 | cold down vs hot |
| CCL3L1    | 4.00E-27 | 3.87E-26 | 0.160631 | -6.22545 | cold down vs hot |
| GBP2      | 2.14E-36 | 2.90E-35 | 0.160592 | -6.22696 | cold down vs hot |
| PTGER2    | 2.31E-38 | 3.35E-37 | 0.160217 | -6.24154 | cold down vs hot |
| CCRL2     | 0        | 0        | 0.159859 | -6.25551 | cold down vs hot |
| KLHL6     | 9.15E-33 | 1.06E-31 | 0.159839 | -6.25631 | cold down vs hot |
| GIMAP6    | 0        | 0        | 0.15931  | -6.27705 | cold down vs hot |
| C4A       | 2.76E-30 | 2.96E-29 | 0.158938 | -6.29177 | cold down vs hot |
| CCL3      | 1.03E-36 | 1.41E-35 | 0.158763 | -6.29868 | cold down vs hot |
| CEBPA     | 1.85E-41 | 3.11E-40 | 0.158588 | -6.30566 | cold down vs hot |
| NCF2      | 1.15E-43 | 2.09E-42 | 0.158072 | -6.32623 | cold down vs hot |
| GPR183    | 5.85E-30 | 6.19E-29 | 0.157783 | -6.33783 | cold down vs hot |
| ALOX15B   | 1.22E-17 | 8.38E-17 | 0.15776  | -6.33873 | cold down vs hot |
| IL15      | 1.15E-26 | 1.10E-25 | 0.157056 | -6.36714 | cold down vs hot |
| TUBA4A    | 7.29E-39 | 1.08E-37 | 0.156997 | -6.36954 | cold down vs hot |
| IFI30     | 0        | 0        | 0.156599 | -6.38574 | cold down vs hot |
| TC2N      | 2.07E-18 | 1.47E-17 | 0.156423 | -6.39292 | cold down vs hot |
| OASL      | 3.99E-29 | 4.09E-28 | 0.15634  | -6.3963  | cold down vs hot |
| C1orf162  | 0        | 0        | 0.156028 | -6.40912 | cold down vs hot |
| SIGLEC7   | 1.02E-42 | 1.81E-41 | 0.155825 | -6.41748 | cold down vs hot |
| PIK3R6    | 1.58E-36 | 2.15E-35 | 0.1555   | -6.43089 | cold down vs hot |
| TRIM22    | 1.29E-39 | 1.99E-38 | 0.155225 | -6.44225 | cold down vs hot |
| CYSLTR1   | 7.07E-41 | 1.16E-39 | 0.155143 | -6.44567 | cold down vs hot |
| RUFY4     | 1.80E-25 | 1.63E-24 | 0.154841 | -6.45825 | cold down vs hot |
| SIDT1     | 2.94E-34 | 3.63E-33 | 0.154721 | -6.46326 | cold down vs hot |
| AKAP5     | 5.31E-32 | 5.99E-31 | 0.154527 | -6.47135 | cold down vs hot |
| FBP1      | 1.08E-30 | 1.18E-29 | 0.15389  | -6.49815 | cold down vs hot |
| KCNJ10    | 6.93E-12 | 3.63E-11 | 0.153789 | -6.50242 | cold down vs hot |
| SCNN1B    | 4.30E-15 | 2.62E-14 | 0.153773 | -6.50309 | cold down vs hot |
| KEL       | 1.67E-18 | 1.20E-17 | 0.153459 | -6.51638 | cold down vs hot |
| ABI3BP    | 4.83E-16 | 3.09E-15 | 0.153102 | -6.53161 | cold down vs hot |
| ABI3      | 0        | 0        | 0.152963 | -6.53753 | cold down vs hot |
| PSMB9     | 0        | 0        | 0.152323 | -6.56498 | cold down vs hot |
| CD1E      | 3.09E-21 | 2.41E-20 | 0.15219  | -6.57073 | cold down vs hot |
| CYTH4     | 0        | 0        | 0.152063 | -6.57624 | cold down vs hot |
| IL18R1    | 2.39E-31 | 2.67E-30 | 0.151773 | -6.5888  | cold down vs hot |
| LSP1      | 0        | 0        | 0.151411 | -6.60453 | cold down vs hot |
| GPA33     | 1.91E-24 | 1.67E-23 | 0.151298 | -6.60945 | cold down vs hot |
| CTSS      | 0        | 0        | 0.150988 | -6.62305 | cold down vs hot |
| LILRA1    | 7.58E-36 | 9.92E-35 | 0.150922 | -6.62594 | cold down vs hot |
| IL18BP    | 0        | 0        | 0.150853 | -6.62896 | cold down vs hot |
| ECEL1     | 4.03E-23 | 3.33E-22 | 0.15083  | -6.62996 | cold down vs hot |
| CD4       | 0        | 0        | 0.150747 | -6.63362 | cold down vs hot |
| APOBEC3H  | 1.10E-30 | 1.20E-29 | 0.150523 | -6.64352 | cold down vs hot |
| CD24      | 1.75E-14 | 1.04E-13 | 0.150516 | -6.64383 | cold down vs hot |
| COL4A4    | 4.67E-27 | 4.52E-26 | 0.150353 | -6.651   | cold down vs hot |
| C10orf128 | 7.47E-39 | 1.10E-37 | 0.150335 | -6.65182 | cold down vs hot |
| UCP2      | 0        | 0        | 0.149009 | -6.71103 | cold down vs hot |
| PPP1R16B  | 1.04E-39 | 1.60E-38 | 0.148903 | -6.71576 | cold down vs hot |
| ARHGAP25  | 0        | 0        | 0.148515 | -6.73334 | cold down vs hot |
| P2RY6     | 0        | 0        | 0.148135 | -6.75061 | cold down vs hot |
| GZMM      | 1.31E-23 | 1.11E-22 | 0.148097 | -6.75233 | cold down vs hot |
| FCGR3A    | 2.12E-33 | 2.53E-32 | 0.147903 | -6.7612  | cold down vs hot |
| SPI1      | 0        | 0        | 0.147635 | -6.77347 | cold down vs hot |
| IL15RA    | 0        | 0        | 0.147595 | -6.77529 | cold down vs hot |
| CD200R1   | 2.06E-35 | 2.66E-34 | 0.147347 | -6.78671 | cold down vs hot |
| TMEM176A  | 0        | 0        | 0.147198 | -6.79358 | cold down vs hot |
| TSPAN32   | 1.74E-29 | 1.80E-28 | 0.147104 | -6.79791 | cold down vs hot |
| ATP2A3    | 1.50E-36 | 2.04E-35 | 0.14705  | -6.80043 | cold down vs hot |
| SCML4     | 1.87E-13 | 1.06E-12 | 0.146946 | -6.80522 | cold down vs hot |
| DHRS9     | 5.38E-26 | 5.00E-25 | 0.146783 | -6.81276 | cold down vs hot |
| DARC      | 2.86E-14 | 1.67E-13 | 0.1466   | -6.82127 | cold down vs hot |
| CFB       | 3.37E-32 | 3.82E-31 | 0.14657  | -6.82267 | cold down vs hot |
| DERL3     | 1.22E-31 | 1.37E-30 | 0.14653  | -6.82456 | cold down vs hot |
| CHI3L1    | 1.01E-13 | 5.79E-13 | 0.146341 | -6.83334 | cold down vs hot |
| GTSF1     | 6.53E-07 | 2.23E-06 | 0.145856 | -6.85606 | cold down vs hot |
| CFP       | 1.99E-33 | 2.38E-32 | 0.14565  | -6.8658  | cold down vs hot |
| FYB       | 1.16E-38 | 1.69E-37 | 0.145584 | -6.8689  | cold down vs hot |
| RHOF      | 3.56E-39 | 5.37E-38 | 0.145475 | -6.87402 | cold down vs hot |
| GGTA1     | 3.42E-40 | 5.41E-39 | 0.145381 | -6.87849 | cold down vs hot |
| PRAM1     | 4.87E-38 | 6.98E-37 | 0.145168 | -6.88858 | cold down vs hot |
| TNFSF10   | 2.01E-40 | 3.26E-39 | 0.144789 | -6.90662 | cold down vs hot |
| TOX2      | 6.43E-27 | 6.18E-26 | 0.144715 | -6.91013 | cold down vs hot |
| PVRIG     | 0        | 0        | 0.144639 | -6.91377 | cold down vs hot |
| C2        | 1.59E-30 | 1.72E-29 | 0.14447  | -6.92184 | cold down vs hot |
| ANKRD58   | 0        | 0        | 0.144112 | -6.93906 | cold down vs hot |
| LY86      | 0        | 0        | 0.144041 | -6.94249 | cold down vs hot |

|           |          |          |          |                 |                  |
|-----------|----------|----------|----------|-----------------|------------------|
| NCF4      | 0        | 0        | 0.143696 | <b>-6.95915</b> | cold down vs hot |
| TNFSF13B  | 2.52E-28 | 2.54E-27 | 0.143148 | <b>-6.98577</b> | cold down vs hot |
| SIRPB2    | 3.60E-42 | 6.15E-41 | 0.142736 | <b>-7.00594</b> | cold down vs hot |
| PLA2G7    | 2.71E-30 | 2.91E-29 | 0.14266  | <b>-7.00966</b> | cold down vs hot |
| ABCC3     | 3.37E-28 | 3.38E-27 | 0.142371 | <b>-7.02391</b> | cold down vs hot |
| MS4A6A    | 0        | 0        | 0.142358 | <b>-7.02455</b> | cold down vs hot |
| HLA-DMA   | 0        | 0        | 0.142342 | <b>-7.02533</b> | cold down vs hot |
| MYO1F     | 0        | 0        | 0.141608 | <b>-7.06177</b> | cold down vs hot |
| C14orf64  | 4.90E-24 | 4.21E-23 | 0.141354 | <b>-7.07445</b> | cold down vs hot |
| CLU       | 6.88E-16 | 4.35E-15 | 0.140957 | <b>-7.09436</b> | cold down vs hot |
| FCN1      | 3.70E-29 | 3.80E-28 | 0.140952 | <b>-7.0946</b>  | cold down vs hot |
| MMP12     | 2.62E-10 | 1.24E-09 | 0.140644 | <b>-7.11013</b> | cold down vs hot |
| BTK       | 0        | 0        | 0.14045  | <b>-7.11997</b> | cold down vs hot |
| LAPTM5    | 0        | 0        | 0.140309 | <b>-7.12713</b> | cold down vs hot |
| ARL11     | 0        | 0        | 0.14023  | <b>-7.13114</b> | cold down vs hot |
| FGR       | 0        | 0        | 0.140038 | <b>-7.14094</b> | cold down vs hot |
| FMNL1     | 0        | 0        | 0.140022 | <b>-7.14175</b> | cold down vs hot |
| NFAM1     | 0        | 0        | 0.139863 | <b>-7.14986</b> | cold down vs hot |
| LAMP3     | 1.81E-40 | 2.95E-39 | 0.139332 | <b>-7.1771</b>  | cold down vs hot |
| CTLA4     | 1.39E-20 | 1.06E-19 | 0.139103 | <b>-7.1889</b>  | cold down vs hot |
| ACSL5     | 9.83E-39 | 1.44E-37 | 0.13905  | <b>-7.19163</b> | cold down vs hot |
| BATF      | 3.32E-37 | 4.65E-36 | 0.138782 | <b>-7.20554</b> | cold down vs hot |
| PIK3AP1   | 0        | 0        | 0.138752 | <b>-7.20708</b> | cold down vs hot |
| FAM179A   | 2.63E-33 | 3.13E-32 | 0.138396 | <b>-7.22566</b> | cold down vs hot |
| HAMP      | 4.50E-18 | 3.16E-17 | 0.138294 | <b>-7.23099</b> | cold down vs hot |
| FCER1G    | 6.89E-36 | 9.02E-35 | 0.13811  | <b>-7.2406</b>  | cold down vs hot |
| CASP5     | 5.70E-28 | 5.64E-27 | 0.137985 | <b>-7.24717</b> | cold down vs hot |
| VCAM1     | 2.31E-37 | 3.25E-36 | 0.137592 | <b>-7.26788</b> | cold down vs hot |
| SIGLEC1   | 2.80E-45 | 5.51E-44 | 0.1375   | <b>-7.27271</b> | cold down vs hot |
| HAVCR2    | 0        | 0        | 0.137008 | <b>-7.29884</b> | cold down vs hot |
| DOCK8     | 0        | 0        | 0.136748 | <b>-7.3127</b>  | cold down vs hot |
| RGS18     | 2.48E-32 | 2.82E-31 | 0.136713 | <b>-7.3146</b>  | cold down vs hot |
| ITM2A     | 4.52E-36 | 6.01E-35 | 0.13641  | <b>-7.33082</b> | cold down vs hot |
| APOL4     | 1.11E-32 | 1.28E-31 | 0.136058 | <b>-7.34982</b> | cold down vs hot |
| TMPRSS3   | 3.89E-19 | 2.86E-18 | 0.135892 | <b>-7.35876</b> | cold down vs hot |
| NLRC3     | 0        | 0        | 0.135885 | <b>-7.35918</b> | cold down vs hot |
| TNFSF8    | 2.10E-44 | 4.00E-43 | 0.135796 | <b>-7.36397</b> | cold down vs hot |
| COL4A3    | 1.72E-18 | 1.23E-17 | 0.135795 | <b>-7.36402</b> | cold down vs hot |
| PTAFR     | 0        | 0        | 0.135637 | <b>-7.37264</b> | cold down vs hot |
| GIMAP1    | 0        | 0        | 0.135363 | <b>-7.38752</b> | cold down vs hot |
| GPR132    | 0        | 0        | 0.135107 | <b>-7.40152</b> | cold down vs hot |
| TMEM176B  | 0        | 0        | 0.134898 | <b>-7.41303</b> | cold down vs hot |
| IL27      | 8.47E-33 | 9.84E-32 | 0.134869 | <b>-7.41463</b> | cold down vs hot |
| RSPO3     | 7.09E-27 | 6.80E-26 | 0.134507 | <b>-7.43456</b> | cold down vs hot |
| RASSF5    | 0        | 0        | 0.13396  | <b>-7.46494</b> | cold down vs hot |
| INSL3     | 2.07E-37 | 2.92E-36 | 0.133915 | <b>-7.46741</b> | cold down vs hot |
| DOK2      | 0        | 0        | 0.132747 | <b>-7.53313</b> | cold down vs hot |
| LAIR1     | 0        | 0        | 0.132648 | <b>-7.53872</b> | cold down vs hot |
| NOD2      | 2.80E-45 | 5.51E-44 | 0.132547 | <b>-7.5445</b>  | cold down vs hot |
| CBFA2T3   | 6.50E-36 | 8.54E-35 | 0.132087 | <b>-7.57077</b> | cold down vs hot |
| CHI3L2    | 2.99E-19 | 2.22E-18 | 0.131771 | <b>-7.58891</b> | cold down vs hot |
| CLEC7A    | 2.52E-44 | 4.77E-43 | 0.131549 | <b>-7.60175</b> | cold down vs hot |
| CD86      | 0        | 0        | 0.131211 | <b>-7.62139</b> | cold down vs hot |
| XIRP1     | 3.98E-19 | 2.93E-18 | 0.131112 | <b>-7.62708</b> | cold down vs hot |
| AIF1      | 0        | 0        | 0.131075 | <b>-7.6292</b>  | cold down vs hot |
| SELPLG    | 0        | 0        | 0.131045 | <b>-7.63097</b> | cold down vs hot |
| FCGR1C    | 1.55E-42 | 2.73E-41 | 0.131038 | <b>-7.63138</b> | cold down vs hot |
| POU2F2    | 4.96E-40 | 7.78E-39 | 0.130963 | <b>-7.63575</b> | cold down vs hot |
| SOCS1     | 0        | 0        | 0.130121 | <b>-7.68516</b> | cold down vs hot |
| ALOX5     | 1.12E-43 | 2.05E-42 | 0.130085 | <b>-7.68726</b> | cold down vs hot |
| FAIM3     | 3.58E-24 | 3.09E-23 | 0.129988 | <b>-7.69304</b> | cold down vs hot |
| CD274     | 4.46E-31 | 4.96E-30 | 0.129875 | <b>-7.69971</b> | cold down vs hot |
| HK3       | 4.18E-38 | 6.03E-37 | 0.129563 | <b>-7.71826</b> | cold down vs hot |
| HCK       | 0        | 0        | 0.129495 | <b>-7.72233</b> | cold down vs hot |
| PSD4      | 0        | 0        | 0.129263 | <b>-7.73616</b> | cold down vs hot |
| ATP1A3    | 1.17E-17 | 8.05E-17 | 0.128918 | <b>-7.75686</b> | cold down vs hot |
| TMC8      | 1.12E-44 | 2.15E-43 | 0.128869 | <b>-7.75981</b> | cold down vs hot |
| FXYD2     | 7.18E-25 | 6.36E-24 | 0.127897 | <b>-7.81878</b> | cold down vs hot |
| TNFSF14   | 3.32E-40 | 5.27E-39 | 0.127847 | <b>-7.82186</b> | cold down vs hot |
| RCSD1     | 0        | 0        | 0.127816 | <b>-7.82374</b> | cold down vs hot |
| TSHR      | 8.36E-34 | 1.01E-32 | 0.12739  | <b>-7.84991</b> | cold down vs hot |
| LST1      | 0        | 0        | 0.12708  | <b>-7.86904</b> | cold down vs hot |
| GPR65     | 1.40E-45 | 2.81E-44 | 0.126744 | <b>-7.88992</b> | cold down vs hot |
| GCET2     | 3.56E-36 | 4.76E-35 | 0.125919 | <b>-7.94159</b> | cold down vs hot |
| IL4I1     | 0        | 0        | 0.124893 | <b>-8.00685</b> | cold down vs hot |
| IGSF6     | 0        | 0        | 0.124674 | <b>-8.02093</b> | cold down vs hot |
| TNFAIP8L2 | 0        | 0        | 0.124001 | <b>-8.06448</b> | cold down vs hot |

|          |          |          |          |                 |                  |
|----------|----------|----------|----------|-----------------|------------------|
| MPEG1    | 0        | 0        | 0.123845 | <b>-8.07462</b> | cold down vs hot |
| FLJ40330 | 4.97E-23 | 4.09E-22 | 0.123035 | <b>-8.12777</b> | cold down vs hot |
| SELP     | 1.45E-19 | 1.08E-18 | 0.123009 | <b>-8.12951</b> | cold down vs hot |
| MIR155HG | 2.66E-30 | 2.86E-29 | 0.122585 | <b>-8.15757</b> | cold down vs hot |
| SECTM1   | 4.20E-45 | 8.14E-44 | 0.122353 | <b>-8.17307</b> | cold down vs hot |
| PACSIN1  | 1.52E-33 | 1.82E-32 | 0.121953 | <b>-8.19985</b> | cold down vs hot |
| GP1BA    | 4.88E-27 | 4.70E-26 | 0.12178  | <b>-8.21153</b> | cold down vs hot |
| MNDA     | 4.25E-43 | 7.68E-42 | 0.121771 | <b>-8.21212</b> | cold down vs hot |
| CXorf21  | 0        | 0        | 0.121707 | <b>-8.21643</b> | cold down vs hot |
| DPEP2    | 0        | 0        | 0.121256 | <b>-8.24703</b> | cold down vs hot |
| EVI2B    | 0        | 0        | 0.121232 | <b>-8.24864</b> | cold down vs hot |
| FAAH2    | 1.58E-30 | 1.71E-29 | 0.120913 | <b>-8.27043</b> | cold down vs hot |
| KIAA1324 | 5.42E-39 | 8.07E-38 | 0.120514 | <b>-8.2978</b>  | cold down vs hot |
| XCR1     | 9.73E-32 | 1.09E-30 | 0.12044  | <b>-8.30287</b> | cold down vs hot |
| P2RY8    | 0        | 0        | 0.120206 | <b>-8.31909</b> | cold down vs hot |
| GIMAP5   | 0        | 0        | 0.120097 | <b>-8.32664</b> | cold down vs hot |
| TMIGD2   | 3.50E-27 | 3.39E-26 | 0.12008  | <b>-8.3278</b>  | cold down vs hot |
| AIM2     | 2.82E-16 | 1.82E-15 | 0.119893 | <b>-8.34077</b> | cold down vs hot |
| C1QC     | 0        | 0        | 0.119787 | <b>-8.34816</b> | cold down vs hot |
| FCGR1B   | 1.49E-43 | 2.70E-42 | 0.119657 | <b>-8.35725</b> | cold down vs hot |
| APOL1    | 2.80E-45 | 5.51E-44 | 0.119507 | <b>-8.3677</b>  | cold down vs hot |
| RASGEF1A | 9.42E-26 | 8.65E-25 | 0.119456 | <b>-8.37128</b> | cold down vs hot |
| MAP4K1   | 0        | 0        | 0.11926  | <b>-8.38504</b> | cold down vs hot |
| GIMAP4   | 0        | 0        | 0.11896  | <b>-8.40619</b> | cold down vs hot |
| GFI1     | 2.45E-42 | 4.22E-41 | 0.118208 | <b>-8.4597</b>  | cold down vs hot |
| HCLS1    | 0        | 0        | 0.118198 | <b>-8.46038</b> | cold down vs hot |
| GAPT     | 5.70E-37 | 7.88E-36 | 0.117972 | <b>-8.47661</b> | cold down vs hot |
| CCR6     | 1.32E-34 | 1.64E-33 | 0.117967 | <b>-8.47697</b> | cold down vs hot |
| SIGLEC5  | 0        | 0        | 0.117914 | <b>-8.48073</b> | cold down vs hot |
| LILRA3   | 1.26E-19 | 9.46E-19 | 0.11761  | <b>-8.50266</b> | cold down vs hot |
| DENND1C  | 0        | 0        | 0.117357 | <b>-8.52104</b> | cold down vs hot |
| LCP1     | 0        | 0        | 0.117194 | <b>-8.53284</b> | cold down vs hot |
| EPST11   | 3.06E-39 | 4.65E-38 | 0.116871 | <b>-8.55643</b> | cold down vs hot |
| PARVG    | 0        | 0        | 0.116489 | <b>-8.58453</b> | cold down vs hot |
| SERPINA1 | 3.89E-37 | 5.41E-36 | 0.116163 | <b>-8.60857</b> | cold down vs hot |
| FGD3     | 0        | 0        | 0.116048 | <b>-8.61712</b> | cold down vs hot |
| CEACAM21 | 1.16E-37 | 1.65E-36 | 0.115556 | <b>-8.65378</b> | cold down vs hot |
| TNF      | 1.41E-37 | 2.01E-36 | 0.115318 | <b>-8.67168</b> | cold down vs hot |
| CCL8     | 1.01E-30 | 1.11E-29 | 0.115281 | <b>-8.67446</b> | cold down vs hot |
| TFEC     | 1.39E-40 | 2.26E-39 | 0.11493  | <b>-8.70095</b> | cold down vs hot |
| ITGB2    | 0        | 0        | 0.11467  | <b>-8.72064</b> | cold down vs hot |
| CECR1    | 0        | 0        | 0.114369 | <b>-8.74362</b> | cold down vs hot |
| TSTD1    | 6.83E-22 | 5.45E-21 | 0.113649 | <b>-8.79901</b> | cold down vs hot |
| SLC12A3  | 4.83E-38 | 6.95E-37 | 0.113273 | <b>-8.82824</b> | cold down vs hot |
| KLRC1    | 6.69E-25 | 5.93E-24 | 0.112905 | <b>-8.85698</b> | cold down vs hot |
| HLA-DRB5 | 3.70E-36 | 4.94E-35 | 0.112675 | <b>-8.87509</b> | cold down vs hot |
| BIRC3    | 4.29E-29 | 4.40E-28 | 0.112185 | <b>-8.91385</b> | cold down vs hot |
| RBPS     | 2.43E-27 | 2.36E-26 | 0.111907 | <b>-8.93598</b> | cold down vs hot |
| HTRA4    | 8.37E-35 | 1.05E-33 | 0.11173  | <b>-8.95014</b> | cold down vs hot |
| CD84     | 6.17E-44 | 1.14E-42 | 0.111593 | <b>-8.9611</b>  | cold down vs hot |
| SLC22A3  | 9.08E-24 | 7.72E-23 | 0.111512 | <b>-8.96762</b> | cold down vs hot |
| IRF1     | 0        | 0        | 0.110927 | <b>-9.01497</b> | cold down vs hot |
| GIMAP7   | 0        | 0        | 0.110892 | <b>-9.01782</b> | cold down vs hot |
| LILRB2   | 0        | 0        | 0.110486 | <b>-9.05095</b> | cold down vs hot |
| FOXP3    | 0        | 0        | 0.109964 | <b>-9.09389</b> | cold down vs hot |
| INPP5D   | 0        | 0        | 0.109953 | <b>-9.09478</b> | cold down vs hot |
| CCDC64   | 3.63E-32 | 4.11E-31 | 0.108832 | <b>-9.18846</b> | cold down vs hot |
| ARHGAP30 | 0        | 0        | 0.108753 | <b>-9.19512</b> | cold down vs hot |
| GNGT2    | 0        | 0        | 0.108708 | <b>-9.19899</b> | cold down vs hot |
| PTGDS    | 1.03E-16 | 6.79E-16 | 0.108694 | <b>-9.20012</b> | cold down vs hot |
| CD180    | 0        | 0        | 0.108639 | <b>-9.20476</b> | cold down vs hot |
| PATL2    | 7.69E-36 | 1.00E-34 | 0.108484 | <b>-9.21791</b> | cold down vs hot |
| HLA-DMB  | 0        | 0        | 0.1079   | <b>-9.26782</b> | cold down vs hot |
| C1QA     | 0        | 0        | 0.107897 | <b>-9.26809</b> | cold down vs hot |
| PLCH2    | 1.49E-32 | 1.71E-31 | 0.107694 | <b>-9.28558</b> | cold down vs hot |
| ITGB7    | 0        | 0        | 0.107644 | <b>-9.28986</b> | cold down vs hot |
| IL2RA    | 5.90E-36 | 7.79E-35 | 0.107508 | <b>-9.3016</b>  | cold down vs hot |
| LRP2     | 1.38E-08 | 5.60E-08 | 0.107354 | <b>-9.31499</b> | cold down vs hot |
| CD226    | 1.40E-45 | 2.81E-44 | 0.107169 | <b>-9.33105</b> | cold down vs hot |
| CCR8     | 9.41E-41 | 1.54E-39 | 0.107102 | <b>-9.33692</b> | cold down vs hot |
| CCDC69   | 0        | 0        | 0.107087 | <b>-9.3382</b>  | cold down vs hot |
| TLR7     | 0        | 0        | 0.107    | <b>-9.3458</b>  | cold down vs hot |
| SUSD3    | 3.36E-44 | 6.29E-43 | 0.106591 | <b>-9.38166</b> | cold down vs hot |
| CYBB     | 0        | 0        | 0.106499 | <b>-9.38976</b> | cold down vs hot |
| FCGR1A   | 5.47E-44 | 1.01E-42 | 0.105959 | <b>-9.43759</b> | cold down vs hot |
| HCST     | 0        | 0        | 0.105041 | <b>-9.52005</b> | cold down vs hot |
| HLA-DPB1 | 0        | 0        | 0.104936 | <b>-9.52961</b> | cold down vs hot |

|           |          |          |           |                 |                  |
|-----------|----------|----------|-----------|-----------------|------------------|
| CD80      | 0        | 0        | 0.104513  | <b>-9.56817</b> | cold down vs hot |
| SLA       | 0        | 0        | 0.104314  | <b>-9.5864</b>  | cold down vs hot |
| SYTL1     | 1.49E-42 | 2.63E-41 | 0.104276  | <b>-9.58989</b> | cold down vs hot |
| DOCK2     | 0        | 0        | 0.104143  | <b>-9.60215</b> | cold down vs hot |
| WAS       | 0        | 0        | 0.103787  | <b>-9.6351</b>  | cold down vs hot |
| ARRDC5    | 0        | 0        | 0.102667  | <b>-9.74027</b> | cold down vs hot |
| HLA-DRB1  | 0        | 0        | 0.102551  | <b>-9.75126</b> | cold down vs hot |
| TMEM150B  | 1.82E-42 | 3.17E-41 | 0.102527  | <b>-9.7535</b>  | cold down vs hot |
| PIK3CG    | 1.53E-38 | 2.23E-37 | 0.10227   | <b>-9.77803</b> | cold down vs hot |
| CD244     | 0        | 0        | 0.101123  | <b>-9.88895</b> | cold down vs hot |
| HCG26     | 0        | 0        | 0.100971  | <b>-9.90383</b> | cold down vs hot |
| CD300LF   | 0        | 0        | 0.100385  | <b>-9.96161</b> | cold down vs hot |
| GBP1      | 2.45E-39 | 3.72E-38 | 0.100287  | <b>-9.9714</b>  | cold down vs hot |
| AMICA1    | 0        | 0        | 0.100236  | <b>-9.97641</b> | cold down vs hot |
| NLRP7     | 2.62E-30 | 2.83E-29 | 0.0999173 | <b>-10.0083</b> | cold down vs hot |
| SLAMF8    | 0        | 0        | 0.0998247 | <b>-10.0176</b> | cold down vs hot |
| PDCD1LG2  | 0        | 0        | 0.0997564 | <b>-10.0244</b> | cold down vs hot |
| WNT10A    | 3.35E-37 | 4.67E-36 | 0.0993058 | <b>-10.0699</b> | cold down vs hot |
| MEI1      | 6.17E-43 | 1.11E-41 | 0.0993015 | <b>-10.0703</b> | cold down vs hot |
| TMEM155   | 1.66E-28 | 1.68E-27 | 0.0988115 | <b>-10.1203</b> | cold down vs hot |
| C1QB      | 0        | 0        | 0.0986006 | <b>-10.1419</b> | cold down vs hot |
| CD79B     | 4.33E-30 | 4.59E-29 | 0.098288  | <b>-10.1742</b> | cold down vs hot |
| DENND2D   | 5.00E-39 | 7.46E-38 | 0.0979127 | <b>-10.2132</b> | cold down vs hot |
| FAM159A   | 2.01E-39 | 3.07E-38 | 0.0978778 | <b>-10.2168</b> | cold down vs hot |
| SIGLEC14  | 0        | 0        | 0.0973297 | <b>-10.2744</b> | cold down vs hot |
| CLEC12A   | 3.29E-35 | 4.20E-34 | 0.0972815 | <b>-10.2794</b> | cold down vs hot |
| RAC2      | 0        | 0        | 0.097227  | <b>-10.2852</b> | cold down vs hot |
| ZBTB32    | 0        | 0        | 0.0962828 | <b>-10.3861</b> | cold down vs hot |
| NLRP2     | 3.20E-20 | 2.43E-19 | 0.0961951 | <b>-10.3955</b> | cold down vs hot |
| CR1       | 6.34E-35 | 8.05E-34 | 0.0955194 | <b>-10.4691</b> | cold down vs hot |
| FGL2      | 1.13E-33 | 1.36E-32 | 0.0954852 | <b>-10.4728</b> | cold down vs hot |
| RGL4      | 0        | 0        | 0.0954465 | <b>-10.4771</b> | cold down vs hot |
| APBB1IP   | 0        | 0        | 0.095248  | <b>-10.4989</b> | cold down vs hot |
| CSF2RB    | 0        | 0        | 0.0949624 | <b>-10.5305</b> | cold down vs hot |
| IL10RA    | 0        | 0        | 0.0946964 | <b>-10.5601</b> | cold down vs hot |
| ASCL2     | 0        | 0        | 0.0945944 | <b>-10.5714</b> | cold down vs hot |
| HLA-DPA1  | 0        | 0        | 0.0941592 | <b>-10.6203</b> | cold down vs hot |
| STAT4     | 0        | 0        | 0.0938901 | <b>-10.6507</b> | cold down vs hot |
| SAMSN1    | 2.80E-45 | 5.51E-44 | 0.0935897 | <b>-10.6849</b> | cold down vs hot |
| CD37      | 0        | 0        | 0.0933756 | <b>-10.7094</b> | cold down vs hot |
| CD72      | 0        | 0        | 0.09312   | <b>-10.7388</b> | cold down vs hot |
| HLA-DQB1  | 0        | 0        | 0.0930243 | <b>-10.7499</b> | cold down vs hot |
| CLIC3     | 6.64E-35 | 8.40E-34 | 0.0929524 | <b>-10.7582</b> | cold down vs hot |
| HCP5      | 7.01E-45 | 1.35E-43 | 0.0925741 | <b>-10.8022</b> | cold down vs hot |
| CD53      | 0        | 0        | 0.0921798 | <b>-10.8484</b> | cold down vs hot |
| PTPN6     | 0        | 0        | 0.0915903 | <b>-10.9182</b> | cold down vs hot |
| SLFN12L   | 0        | 0        | 0.0911653 | <b>-10.9691</b> | cold down vs hot |
| LYZ       | 3.26E-40 | 5.19E-39 | 0.0909446 | <b>-10.9957</b> | cold down vs hot |
| SPOCK2    | 0        | 0        | 0.0908518 | <b>-11.0069</b> | cold down vs hot |
| NCKAP1L   | 0        | 0        | 0.0908444 | <b>-11.0078</b> | cold down vs hot |
| SLC27A2   | 1.40E-34 | 1.74E-33 | 0.0908192 | <b>-11.0109</b> | cold down vs hot |
| CD1C      | 1.17E-29 | 1.23E-28 | 0.0907552 | <b>-11.0186</b> | cold down vs hot |
| P2RX1     | 8.77E-40 | 1.36E-38 | 0.0907242 | <b>-11.0224</b> | cold down vs hot |
| CLEC9A    | 5.62E-35 | 7.14E-34 | 0.0904295 | <b>-11.0583</b> | cold down vs hot |
| RASGRP2   | 8.65E-43 | 1.54E-41 | 0.0904008 | <b>-11.0618</b> | cold down vs hot |
| LILRB4    | 0        | 0        | 0.0896077 | <b>-11.1598</b> | cold down vs hot |
| EPHA1     | 6.98E-37 | 9.61E-36 | 0.08943   | <b>-11.1819</b> | cold down vs hot |
| TTC24     | 1.03E-30 | 1.13E-29 | 0.0893844 | <b>-11.1876</b> | cold down vs hot |
| ZNF80     | 8.80E-37 | 1.21E-35 | 0.0893269 | <b>-11.1948</b> | cold down vs hot |
| MYO1G     | 0        | 0        | 0.088562  | <b>-11.2915</b> | cold down vs hot |
| LOC606724 | 0        | 0        | 0.0884136 | <b>-11.3105</b> | cold down vs hot |
| CD5L      | 4.97E-15 | 3.01E-14 | 0.0881761 | <b>-11.3409</b> | cold down vs hot |
| TREML2    | 9.87E-33 | 1.14E-31 | 0.0876593 | <b>-11.4078</b> | cold down vs hot |
| ADAM28    | 4.72E-39 | 7.06E-38 | 0.087509  | <b>-11.4274</b> | cold down vs hot |
| VPREB3    | 2.78E-25 | 2.50E-24 | 0.0874339 | <b>-11.4372</b> | cold down vs hot |
| TNFRSF18  | 1.40E-45 | 2.81E-44 | 0.0872626 | <b>-11.4597</b> | cold down vs hot |
| MARCO     | 2.27E-18 | 1.61E-17 | 0.0871199 | <b>-11.4784</b> | cold down vs hot |
| CCL4L2    | 0        | 0        | 0.0870659 | <b>-11.4855</b> | cold down vs hot |
| PTPN22    | 0        | 0        | 0.0869871 | <b>-11.496</b>  | cold down vs hot |
| HSD11B1   | 5.69E-39 | 8.45E-38 | 0.0866146 | <b>-11.5454</b> | cold down vs hot |
| RASGRP1   | 4.20E-45 | 8.14E-44 | 0.0864283 | <b>-11.5703</b> | cold down vs hot |
| PLEK      | 0        | 0        | 0.0861981 | <b>-11.6012</b> | cold down vs hot |
| FGD2      | 0        | 0        | 0.0860298 | <b>-11.6239</b> | cold down vs hot |
| EMR1      | 5.51E-39 | 8.20E-38 | 0.0854839 | <b>-11.6981</b> | cold down vs hot |
| ABCD2     | 4.34E-44 | 8.10E-43 | 0.0850334 | <b>-11.7601</b> | cold down vs hot |
| SEPT1     | 0        | 0        | 0.0847992 | <b>-11.7926</b> | cold down vs hot |
| FCRL6     | 0        | 0        | 0.0843214 | <b>-11.8594</b> | cold down vs hot |

|           |          |          |           |                 |                  |
|-----------|----------|----------|-----------|-----------------|------------------|
| IL18RAP   | 0        | 0        | 0.0841483 | <b>-11.8838</b> | cold down vs hot |
| CCL22     | 2.06E-41 | 3.45E-40 | 0.0841293 | <b>-11.8865</b> | cold down vs hot |
| VNN2      | 0        | 0        | 0.0840875 | <b>-11.8924</b> | cold down vs hot |
| HLA-DPB2  | 8.13E-44 | 1.49E-42 | 0.0840634 | <b>-11.8958</b> | cold down vs hot |
| PLD4      | 1.34E-36 | 1.83E-35 | 0.0840489 | <b>-11.8978</b> | cold down vs hot |
| KCNA3     | 2.66E-44 | 5.02E-43 | 0.0837675 | <b>-11.9378</b> | cold down vs hot |
| PRKCB     | 3.72E-40 | 5.88E-39 | 0.0835791 | <b>-11.9647</b> | cold down vs hot |
| ARHGAP9   | 0        | 0        | 0.0835622 | <b>-11.9671</b> | cold down vs hot |
| ZC3H12D   | 0        | 0        | 0.0831057 | <b>-12.0329</b> | cold down vs hot |
| ZNF683    | 3.44E-36 | 4.61E-35 | 0.0826002 | <b>-12.1065</b> | cold down vs hot |
| C11orf21  | 0        | 0        | 0.0825747 | <b>-12.1102</b> | cold down vs hot |
| GVIN1     | 0        | 0        | 0.0820713 | <b>-12.1845</b> | cold down vs hot |
| DNAJC5B   | 3.36E-44 | 6.29E-43 | 0.0819196 | <b>-12.2071</b> | cold down vs hot |
| IL18      | 0        | 0        | 0.0812815 | <b>-12.3029</b> | cold down vs hot |
| BCL2L14   | 0        | 0        | 0.0810738 | <b>-12.3344</b> | cold down vs hot |
| IPCEF1    | 0        | 0        | 0.0809764 | <b>-12.3493</b> | cold down vs hot |
| LILRB1    | 0        | 0        | 0.0805701 | <b>-12.4115</b> | cold down vs hot |
| EBI3      | 0        | 0        | 0.0801923 | <b>-12.47</b>   | cold down vs hot |
| NCF1B     | 0        | 0        | 0.0801342 | <b>-12.4791</b> | cold down vs hot |
| TAGAP     | 0        | 0        | 0.0794641 | <b>-12.5843</b> | cold down vs hot |
| ITGAD     | 1.70E-31 | 1.90E-30 | 0.0791932 | <b>-12.6273</b> | cold down vs hot |
| SKAP1     | 3.93E-28 | 3.93E-27 | 0.0791122 | <b>-12.6403</b> | cold down vs hot |
| C17orf87  | 0        | 0        | 0.0790057 | <b>-12.6573</b> | cold down vs hot |
| CLEC10A   | 2.82E-40 | 4.52E-39 | 0.0787569 | <b>-12.6973</b> | cold down vs hot |
| CD74      | 0        | 0        | 0.0787517 | <b>-12.6981</b> | cold down vs hot |
| BIN2      | 0        | 0        | 0.078749  | <b>-12.6986</b> | cold down vs hot |
| SPNS3     | 4.20E-45 | 8.14E-44 | 0.0784221 | <b>-12.7515</b> | cold down vs hot |
| IL7R      | 2.89E-35 | 3.71E-34 | 0.0780539 | <b>-12.8117</b> | cold down vs hot |
| APOL3     | 0        | 0        | 0.0778776 | <b>-12.8407</b> | cold down vs hot |
| FUT7      | 0        | 0        | 0.0774239 | <b>-12.9159</b> | cold down vs hot |
| CORO1A    | 0        | 0        | 0.0772432 | <b>-12.9461</b> | cold down vs hot |
| HLA-DRB6  | 2.96E-37 | 4.14E-36 | 0.077124  | <b>-12.9661</b> | cold down vs hot |
| CCR4      | 0        | 0        | 0.0770811 | <b>-12.9733</b> | cold down vs hot |
| FAM113B   | 0        | 0        | 0.0770356 | <b>-12.981</b>  | cold down vs hot |
| IRF8      | 0        | 0        | 0.0766733 | <b>-13.0424</b> | cold down vs hot |
| TOX       | 1.05E-40 | 1.71E-39 | 0.0765097 | <b>-13.0702</b> | cold down vs hot |
| KIR2DL4   | 6.08E-33 | 7.17E-32 | 0.0764477 | <b>-13.0808</b> | cold down vs hot |
| LRMP      | 0        | 0        | 0.0760743 | <b>-13.145</b>  | cold down vs hot |
| KLHDC7B   | 0        | 0        | 0.0759105 | <b>-13.1734</b> | cold down vs hot |
| SASH3     | 0        | 0        | 0.0757871 | <b>-13.1949</b> | cold down vs hot |
| CLECL1    | 0        | 0        | 0.0751422 | <b>-13.3081</b> | cold down vs hot |
| LOC400759 | 8.65E-31 | 9.56E-30 | 0.074764  | <b>-13.3754</b> | cold down vs hot |
| DAPP1     | 0        | 0        | 0.0745726 | <b>-13.4097</b> | cold down vs hot |
| IL32      | 0        | 0        | 0.0744937 | <b>-13.424</b>  | cold down vs hot |
| GBP4      | 5.59E-43 | 1.01E-41 | 0.0740357 | <b>-13.507</b>  | cold down vs hot |
| CCL4      | 0        | 0        | 0.0735458 | <b>-13.597</b>  | cold down vs hot |
| HLA-DRA   | 0        | 0        | 0.0730592 | <b>-13.6875</b> | cold down vs hot |
| CP        | 1.44E-26 | 1.37E-25 | 0.0724782 | <b>-13.7973</b> | cold down vs hot |
| FAM129C   | 1.00E-30 | 1.10E-29 | 0.0724545 | <b>-13.8018</b> | cold down vs hot |
| RAB37     | 0        | 0        | 0.0719993 | <b>-13.889</b>  | cold down vs hot |
| CCR5      | 0        | 0        | 0.0718221 | <b>-13.9233</b> | cold down vs hot |
| PTPN7     | 0        | 0        | 0.0717224 | <b>-13.9426</b> | cold down vs hot |
| IL2RB     | 0        | 0        | 0.0715421 | <b>-13.9778</b> | cold down vs hot |
| ETV7      | 3.36E-44 | 6.29E-43 | 0.0704563 | <b>-14.1932</b> | cold down vs hot |
| S1PR4     | 0        | 0        | 0.0700592 | <b>-14.2737</b> | cold down vs hot |
| P2RY13    | 0        | 0        | 0.0698069 | <b>-14.3252</b> | cold down vs hot |
| DTHD1     | 6.17E-44 | 1.14E-42 | 0.0694039 | <b>-14.4084</b> | cold down vs hot |
| HLA-DOA   | 0        | 0        | 0.0693978 | <b>-14.4097</b> | cold down vs hot |
| PSTPIP1   | 0        | 0        | 0.068776  | <b>-14.54</b>   | cold down vs hot |
| SELL      | 0        | 0        | 0.0685024 | <b>-14.598</b>  | cold down vs hot |
| VAV1      | 0        | 0        | 0.0681992 | <b>-14.6629</b> | cold down vs hot |
| RASAL3    | 0        | 0        | 0.0680788 | <b>-14.6889</b> | cold down vs hot |
| RARRES3   | 0        | 0        | 0.067832  | <b>-14.7423</b> | cold down vs hot |
| SIGLEC10  | 0        | 0        | 0.0673627 | <b>-14.845</b>  | cold down vs hot |
| TNIP3     | 2.27E-42 | 3.93E-41 | 0.0671302 | <b>-14.8964</b> | cold down vs hot |
| LY75      | 0        | 0        | 0.0669712 | <b>-14.9318</b> | cold down vs hot |
| TLR8      | 0        | 0        | 0.0668436 | <b>-14.9603</b> | cold down vs hot |
| GNLY      | 3.33E-41 | 5.51E-40 | 0.0668096 | <b>-14.9679</b> | cold down vs hot |
| CLEC17A   | 1.27E-30 | 1.38E-29 | 0.0666094 | <b>-15.0129</b> | cold down vs hot |
| HLA-DQA1  | 0        | 0        | 0.0665828 | <b>-15.0189</b> | cold down vs hot |
| GPR18     | 0        | 0        | 0.0664217 | <b>-15.0553</b> | cold down vs hot |
| SPN       | 0        | 0        | 0.0661388 | <b>-15.1197</b> | cold down vs hot |
| CLEC4E    | 2.39E-42 | 4.12E-41 | 0.0658925 | <b>-15.1762</b> | cold down vs hot |
| SNX20     | 0        | 0        | 0.0656424 | <b>-15.234</b>  | cold down vs hot |
| XCL1      | 0        | 0        | 0.0654879 | <b>-15.27</b>   | cold down vs hot |
| NCR3      | 0        | 0        | 0.0653522 | <b>-15.3017</b> | cold down vs hot |
| BLNK      | 0        | 0        | 0.0647746 | <b>-15.4382</b> | cold down vs hot |

|           |          |          |           |                 |                  |
|-----------|----------|----------|-----------|-----------------|------------------|
| AOAH      | 0        | 0        | 0.0646392 | <b>-15.4705</b> | cold down vs hot |
| GPR174    | 0        | 0        | 0.0637392 | <b>-15.6889</b> | cold down vs hot |
| PRKCQ     | 0        | 0        | 0.0634428 | <b>-15.7622</b> | cold down vs hot |
| GATA3     | 0        | 0        | 0.0634009 | <b>-15.7727</b> | cold down vs hot |
| FAM26F    | 0        | 0        | 0.0631753 | <b>-15.829</b>  | cold down vs hot |
| CYTIP     | 0        | 0        | 0.0631185 | <b>-15.8432</b> | cold down vs hot |
| JSRP1     | 1.57E-28 | 1.60E-27 | 0.062735  | <b>-15.9401</b> | cold down vs hot |
| C16orf54  | 0        | 0        | 0.0621829 | <b>-16.0816</b> | cold down vs hot |
| CST7      | 0        | 0        | 0.06209   | <b>-16.1057</b> | cold down vs hot |
| WDFY4     | 0        | 0        | 0.0620583 | <b>-16.1139</b> | cold down vs hot |
| C3        | 5.08E-33 | 5.99E-32 | 0.0617164 | <b>-16.2032</b> | cold down vs hot |
| IKZF1     | 0        | 0        | 0.0604554 | <b>-16.5411</b> | cold down vs hot |
| SLAMF7    | 1.78E-42 | 3.11E-41 | 0.0602922 | <b>-16.5859</b> | cold down vs hot |
| TRAF3IP3  | 0        | 0        | 0.0601782 | <b>-16.6173</b> | cold down vs hot |
| CD52      | 0        | 0        | 0.0599499 | <b>-16.6806</b> | cold down vs hot |
| CCR2      | 0        | 0        | 0.0599387 | <b>-16.6837</b> | cold down vs hot |
| PARP15    | 0        | 0        | 0.059807  | <b>-16.7204</b> | cold down vs hot |
| NCF1C     | 0        | 0        | 0.0597986 | <b>-16.7228</b> | cold down vs hot |
| CD48      | 0        | 0        | 0.0595565 | <b>-16.7908</b> | cold down vs hot |
| IL12RB1   | 0        | 0        | 0.05947   | <b>-16.8152</b> | cold down vs hot |
| TLR10     | 2.80E-45 | 5.51E-44 | 0.0585734 | <b>-17.0726</b> | cold down vs hot |
| TIMD4     | 1.88E-33 | 2.25E-32 | 0.058548  | <b>-17.08</b>   | cold down vs hot |
| CD69      | 0        | 0        | 0.0584636 | <b>-17.1047</b> | cold down vs hot |
| TMEM156   | 0        | 0        | 0.058211  | <b>-17.1789</b> | cold down vs hot |
| SP140     | 0        | 0        | 0.0579784 | <b>-17.2478</b> | cold down vs hot |
| FLT3      | 0        | 0        | 0.0579679 | <b>-17.2509</b> | cold down vs hot |
| KLRK1     | 0        | 0        | 0.0575071 | <b>-17.3892</b> | cold down vs hot |
| KLRB1     | 0        | 0        | 0.0574358 | <b>-17.4107</b> | cold down vs hot |
| CD40LG    | 0        | 0        | 0.0573726 | <b>-17.4299</b> | cold down vs hot |
| NCF1      | 0        | 0        | 0.0562254 | <b>-17.7855</b> | cold down vs hot |
| FCRL2     | 8.03E-29 | 8.17E-28 | 0.056198  | <b>-17.7942</b> | cold down vs hot |
| RLTPR     | 0        | 0        | 0.0561514 | <b>-17.809</b>  | cold down vs hot |
| CD96      | 0        | 0        | 0.0559708 | <b>-17.8665</b> | cold down vs hot |
| KLRD1     | 0        | 0        | 0.0558816 | <b>-17.895</b>  | cold down vs hot |
| CXCL11    | 3.39E-36 | 4.55E-35 | 0.0555685 | <b>-17.9958</b> | cold down vs hot |
| C14orf73  | 1.87E-37 | 2.63E-36 | 0.0551884 | <b>-18.1197</b> | cold down vs hot |
| PLAC8     | 0        | 0        | 0.0548421 | <b>-18.2342</b> | cold down vs hot |
| CIITA     | 0        | 0        | 0.0548105 | <b>-18.2447</b> | cold down vs hot |
| TIFAB     | 0        | 0        | 0.0547709 | <b>-18.2579</b> | cold down vs hot |
| LILRA4    | 9.53E-44 | 1.75E-42 | 0.0544107 | <b>-18.3787</b> | cold down vs hot |
| PTPRC     | 0        | 0        | 0.0541507 | <b>-18.467</b>  | cold down vs hot |
| GPR114    | 0        | 0        | 0.0535956 | <b>-18.6583</b> | cold down vs hot |
| PRF1      | 0        | 0        | 0.0533842 | <b>-18.7321</b> | cold down vs hot |
| CTSW      | 0        | 0        | 0.0532618 | <b>-18.7752</b> | cold down vs hot |
| ZNF831    | 0        | 0        | 0.0522787 | <b>-19.1282</b> | cold down vs hot |
| PYHIN1    | 0        | 0        | 0.0522168 | <b>-19.1509</b> | cold down vs hot |
| BCL11B    | 0        | 0        | 0.0521061 | <b>-19.1916</b> | cold down vs hot |
| ZAP70     | 0        | 0        | 0.051594  | <b>-19.3821</b> | cold down vs hot |
| HLA-DQA2  | 0        | 0        | 0.0509923 | <b>-19.6108</b> | cold down vs hot |
| SAMD3     | 0        | 0        | 0.0509599 | <b>-19.6233</b> | cold down vs hot |
| HLA-DQB2  | 1.40E-44 | 2.67E-43 | 0.0508984 | <b>-19.647</b>  | cold down vs hot |
| CCL5      | 0        | 0        | 0.0508097 | <b>-19.6813</b> | cold down vs hot |
| ANKRD22   | 0        | 0        | 0.0506075 | <b>-19.7599</b> | cold down vs hot |
| CXCL10    | 1.93E-39 | 2.97E-38 | 0.0505075 | <b>-19.7991</b> | cold down vs hot |
| TARP      | 0        | 0        | 0.0504319 | <b>-19.8287</b> | cold down vs hot |
| CRTAM     | 0        | 0        | 0.0504003 | <b>-19.8412</b> | cold down vs hot |
| ICOS      | 0        | 0        | 0.0502582 | <b>-19.8972</b> | cold down vs hot |
| SIGLEC8   | 3.46E-41 | 5.71E-40 | 0.0495201 | <b>-20.1938</b> | cold down vs hot |
| CARD11    | 0        | 0        | 0.0495147 | <b>-20.196</b>  | cold down vs hot |
| ANO9      | 0        | 0        | 0.0492285 | <b>-20.3135</b> | cold down vs hot |
| BTLA      | 0        | 0        | 0.0492105 | <b>-20.3209</b> | cold down vs hot |
| LOC100233 | 0        | 0        | 0.0485629 | <b>-20.5919</b> | cold down vs hot |
| NAPSB     | 0        | 0        | 0.0485044 | <b>-20.6167</b> | cold down vs hot |
| CXCR6     | 0        | 0        | 0.0476221 | <b>-20.9987</b> | cold down vs hot |
| TBX21     | 0        | 0        | 0.0475147 | <b>-21.0461</b> | cold down vs hot |
| PTPRCAP   | 0        | 0        | 0.0472964 | <b>-21.1433</b> | cold down vs hot |
| LTA       | 0        | 0        | 0.0470939 | <b>-21.2342</b> | cold down vs hot |
| HSH2D     | 0        | 0        | 0.0466282 | <b>-21.4463</b> | cold down vs hot |
| CD6       | 0        | 0        | 0.0464878 | <b>-21.511</b>  | cold down vs hot |
| DNASE1L3  | 1.10E-35 | 1.42E-34 | 0.046394  | <b>-21.5545</b> | cold down vs hot |
| PAX5      | 1.65E-23 | 1.39E-22 | 0.0460755 | <b>-21.7035</b> | cold down vs hot |
| ITK       | 0        | 0        | 0.0460347 | <b>-21.7227</b> | cold down vs hot |
| CD247     | 0        | 0        | 0.0460094 | <b>-21.7347</b> | cold down vs hot |
| TBC1D10C  | 0        | 0        | 0.0458946 | <b>-21.7891</b> | cold down vs hot |
| IL2RG     | 0        | 0        | 0.0456533 | <b>-21.9042</b> | cold down vs hot |
| CHIT1     | 1.36E-21 | 1.07E-20 | 0.0449821 | <b>-22.2311</b> | cold down vs hot |
| GPR171    | 0        | 0        | 0.0448568 | <b>-22.2932</b> | cold down vs hot |

|           |          |          |           |                 |                  |
|-----------|----------|----------|-----------|-----------------|------------------|
| IL21R     | 0        | 0        | 0.0447979 | <b>-22.3225</b> | cold down vs hot |
| LGALS2    | 0        | 0        | 0.0442795 | <b>-22.5838</b> | cold down vs hot |
| ITGAL     | 0        | 0        | 0.043971  | <b>-22.7423</b> | cold down vs hot |
| XCL2      | 0        | 0        | 0.0437033 | <b>-22.8816</b> | cold down vs hot |
| PNOC      | 9.06E-41 | 1.49E-39 | 0.0436813 | <b>-22.8931</b> | cold down vs hot |
| BLK       | 2.92E-31 | 3.26E-30 | 0.043125  | <b>-23.1884</b> | cold down vs hot |
| TNFRSF9   | 0        | 0        | 0.0430416 | <b>-23.2334</b> | cold down vs hot |
| SLA2      | 0        | 0        | 0.0429816 | <b>-23.2658</b> | cold down vs hot |
| C5orf20   | 0        | 0        | 0.0419615 | <b>-23.8314</b> | cold down vs hot |
| HLA-DOB   | 0        | 0        | 0.0416069 | <b>-24.0345</b> | cold down vs hot |
| C4orf7    | 6.43E-17 | 4.28E-16 | 0.0414584 | <b>-24.1205</b> | cold down vs hot |
| TNFRSF13B | 6.74E-34 | 8.17E-33 | 0.0411677 | <b>-24.2909</b> | cold down vs hot |
| CD7       | 0        | 0        | 0.0408357 | <b>-24.4884</b> | cold down vs hot |
| SPIB      | 0        | 0        | 0.040589  | <b>-24.6372</b> | cold down vs hot |
| GZMH      | 0        | 0        | 0.040529  | <b>-24.6737</b> | cold down vs hot |
| LOC96610  | 0        | 0        | 0.0405179 | <b>-24.6805</b> | cold down vs hot |
| RHOH      | 0        | 0        | 0.0404289 | <b>-24.7348</b> | cold down vs hot |
| GZMA      | 0        | 0        | 0.0401716 | <b>-24.8932</b> | cold down vs hot |
| C8orf80   | 0        | 0        | 0.0399177 | <b>-25.0515</b> | cold down vs hot |
| ACAP1     | 0        | 0        | 0.0398542 | <b>-25.0914</b> | cold down vs hot |
| SLAMF1    | 2.80E-45 | 5.51E-44 | 0.039668  | <b>-25.2092</b> | cold down vs hot |
| ZBED2     | 0        | 0        | 0.0395517 | <b>-25.2834</b> | cold down vs hot |
| GZMB      | 0        | 0        | 0.0392717 | <b>-25.4636</b> | cold down vs hot |
| THEMIS    | 0        | 0        | 0.0388858 | <b>-25.7163</b> | cold down vs hot |
| NKG7      | 0        | 0        | 0.0385196 | <b>-25.9608</b> | cold down vs hot |
| LY9       | 0        | 0        | 0.0383015 | <b>-26.1086</b> | cold down vs hot |
| CD38      | 0        | 0        | 0.0382675 | <b>-26.1318</b> | cold down vs hot |
| IKZF3     | 0        | 0        | 0.0381824 | <b>-26.19</b>   | cold down vs hot |
| LAG3      | 0        | 0        | 0.0380957 | <b>-26.2497</b> | cold down vs hot |
| KIAA0748  | 0        | 0        | 0.0380687 | <b>-26.2683</b> | cold down vs hot |
| FASLG     | 0        | 0        | 0.0379938 | <b>-26.3201</b> | cold down vs hot |
| FCER2     | 4.43E-24 | 3.81E-23 | 0.0378748 | <b>-26.4028</b> | cold down vs hot |
| CXCR3     | 0        | 0        | 0.0377251 | <b>-26.5076</b> | cold down vs hot |
| STAP1     | 1.40E-45 | 2.81E-44 | 0.0373425 | <b>-26.7791</b> | cold down vs hot |
| CCR7      | 0        | 0        | 0.0369675 | <b>-27.0508</b> | cold down vs hot |
| LTB       | 0        | 0        | 0.0368599 | <b>-27.1297</b> | cold down vs hot |
| CD5       | 0        | 0        | 0.0366003 | <b>-27.3222</b> | cold down vs hot |
| IFNG      | 3.29E-41 | 5.46E-40 | 0.0364475 | <b>-27.4367</b> | cold down vs hot |
| ZBP1      | 0        | 0        | 0.0363481 | <b>-27.5117</b> | cold down vs hot |
| SH2D1A    | 0        | 0        | 0.03619   | <b>-27.632</b>  | cold down vs hot |
| P2RY10    | 0        | 0        | 0.0358502 | <b>-27.8939</b> | cold down vs hot |
| CD2       | 0        | 0        | 0.0356606 | <b>-28.0421</b> | cold down vs hot |
| CXCR2P1   | 0        | 0        | 0.0343226 | <b>-29.1353</b> | cold down vs hot |
| JAKMIP1   | 0        | 0        | 0.0339375 | <b>-29.4659</b> | cold down vs hot |
| GBP5      | 0        | 0        | 0.0339004 | <b>-29.4981</b> | cold down vs hot |
| LAX1      | 0        | 0        | 0.0338516 | <b>-29.5407</b> | cold down vs hot |
| TRAT1     | 0        | 0        | 0.0338415 | <b>-29.5496</b> | cold down vs hot |
| TCL1A     | 1.80E-29 | 1.87E-28 | 0.0336607 | <b>-29.7082</b> | cold down vs hot |
| CD27      | 0        | 0        | 0.0335531 | <b>-29.8035</b> | cold down vs hot |
| IDO1      | 0        | 0        | 0.0334082 | <b>-29.9328</b> | cold down vs hot |
| CCCL21    | 3.14E-19 | 2.33E-18 | 0.0331058 | <b>-30.2061</b> | cold down vs hot |
| CD3G      | 0        | 0        | 0.0329784 | <b>-30.3229</b> | cold down vs hot |
| LCK       | 0        | 0        | 0.0328008 | <b>-30.487</b>  | cold down vs hot |
| CD3E      | 0        | 0        | 0.0327655 | <b>-30.5199</b> | cold down vs hot |
| SIT1      | 0        | 0        | 0.0322156 | <b>-31.0409</b> | cold down vs hot |
| CD8A      | 0        | 0        | 0.0319912 | <b>-31.2586</b> | cold down vs hot |
| SLAMF6    | 0        | 0        | 0.0313281 | <b>-31.9203</b> | cold down vs hot |
| BANK1     | 5.47E-44 | 1.01E-42 | 0.0312362 | <b>-32.0141</b> | cold down vs hot |
| KIAA0125  | 4.34E-38 | 6.25E-37 | 0.0309402 | <b>-32.3204</b> | cold down vs hot |
| TNFRSF17  | 4.60E-40 | 7.24E-39 | 0.030686  | <b>-32.5882</b> | cold down vs hot |
| TIGIT     | 0        | 0        | 0.0306249 | <b>-32.6532</b> | cold down vs hot |
| UBASH3A   | 0        | 0        | 0.0290748 | <b>-34.3941</b> | cold down vs hot |
| PDCC1     | 0        | 0        | 0.0283897 | <b>-35.224</b>  | cold down vs hot |
| ADAMDEC1  | 0        | 0        | 0.0279464 | <b>-35.7827</b> | cold down vs hot |
| CXCL9     | 0        | 0        | 0.027291  | <b>-36.6421</b> | cold down vs hot |
| UBD       | 0        | 0        | 0.0268218 | <b>-37.2831</b> | cold down vs hot |
| CD19      | 1.40E-29 | 1.47E-28 | 0.0266594 | <b>-37.5102</b> | cold down vs hot |
| CD3D      | 0        | 0        | 0.026524  | <b>-37.7017</b> | cold down vs hot |
| CD8B      | 0        | 0        | 0.0260955 | <b>-38.3208</b> | cold down vs hot |
| CXCR5     | 0        | 0        | 0.0254646 | <b>-39.2702</b> | cold down vs hot |
| GZMK      | 0        | 0        | 0.0251577 | <b>-39.7492</b> | cold down vs hot |
| SIRPG     | 0        | 0        | 0.0239428 | <b>-41.7661</b> | cold down vs hot |
| FCRL3     | 0        | 0        | 0.0207024 | <b>-48.3035</b> | cold down vs hot |
| FCRL5     | 1.40E-45 | 2.81E-44 | 0.0193814 | <b>-51.5959</b> | cold down vs hot |
| CCL19     | 1.72E-41 | 2.90E-40 | 0.0192465 | <b>-51.9576</b> | cold down vs hot |
| POU2AF1   | 0        | 0        | 0.0183461 | <b>-54.5076</b> | cold down vs hot |
| CD79A     | 0        | 0        | 0.018171  | <b>-55.0327</b> | cold down vs hot |

|          |          |          |            |                 |                  |
|----------|----------|----------|------------|-----------------|------------------|
| MGC29506 | 0        | 0        | 0.0174527  | <b>-57.2978</b> | cold down vs hot |
| IGJ      | 0        | 0        | 0.0171718  | <b>-58.2351</b> | cold down vs hot |
| ADAM6    | 0        | 0        | 0.0168732  | <b>-59.2657</b> | cold down vs hot |
| CXCL13   | 0        | 0        | 0.0153068  | <b>-65.3303</b> | cold down vs hot |
| MS4A1    | 1.77E-41 | 2.98E-40 | 0.0149823  | <b>-66.7456</b> | cold down vs hot |
| PLA2G2D  | 0        | 0        | 0.00953335 | <b>-104.895</b> | cold down vs hot |

## SI table 2a Pearson correlation between gene of interest and CD8a

|              | R2     | pearson-correlation |
|--------------|--------|---------------------|
| CTNNB1       | 0.03   | 0.0129              |
| Axin1        | 0.02   | 0.0315              |
| Axin2        | 0.0044 | 0.23                |
| APC          | 0.005  | 0.19                |
| APC2         | 0.06   | 0.0005              |
| Wnt7b        | 0.034  | 0.028               |
| FZD3         | 0.075  | <0.0001             |
| TCF1 (HNF1A) | 0.07   | 0.0002              |
| TCF12        | 0.02   | 0.0455              |
| c-myc        | 0.16   | <0.0001             |
| CDH1         | 0.18   | <0.0001             |
| CDKN2A       | 0.052  | 0.0012              |
| EFNB3        | 0.088  | <0.0001             |
| VEGF         | 0.048  | 0.0018              |
| Sox2         | 0.026  | 0.0029              |
| Sox9         | 0.0026 | 0.35                |

## SI table 2b Pearson correlation between CTNNB1 score and gene of interest

|       | R2     | pearson-correlation |
|-------|--------|---------------------|
| CD8a  | 0.2137 | <0.0001             |
| THBD  | 0.1087 | <0.0001             |
| Batf3 | 0.2271 | 0.0336              |
| IRF8  | 0.2374 | <0.0001             |

SI table 3a Mutations in patients with T cell signature low

|                 |                 | tumor source    | nt mutation | aa position | aa change | functional consequence | SIFT score |      |
|-----------------|-----------------|-----------------|-------------|-------------|-----------|------------------------|------------|------|
| CTNNB1          | TCGA-EE-A182-06 | met             | G/A         | 25          | W/*       | GOF                    |            |      |
|                 | TCGA-EB-A3Y7-01 | prim            | A/G         | 32          | D/G       | GOF                    | 0          |      |
|                 | TCGA-FS-A4F9-06 | met             | G/A         | 34          | G/R       | GOF                    | 0          |      |
|                 | TCGA-FS-A1YY-06 | met             | C/G         | 41          | T/S       | GOF                    | 0          |      |
|                 | TCGA-EB-A42Y-01 | met             | C/T         | 44          | S/C       | GOF                    | 0          |      |
|                 | TCGA-EE-A2M6-06 | met             | CT/:-       | 44          | S/F       | GOF                    | 0          |      |
|                 | TCGA-EE-A180-06 | met             | A/G         | 292         | K/E       | GOF                    | 0          |      |
|                 | TCGA-D3-A1Q5-06 | met             | T/G         | 439         | C/G       | GOF                    | 0          |      |
|                 | TCGA-EE-A29A-06 | met             | C/T         | 606         | P/L       | tolerated              | 0.27       |      |
|                 | TCGA-EE-A29L-06 | met             | A/G         | 46          | S/F       | tolerated              | 0.1        |      |
| Axin1           | TCGA-FS-A1ZK-06 | met             | C/T         | 342         | G/E       | LOF                    | 0.06       |      |
|                 | TCGA-EB-A431-01 | prim            | G/A         | 478         | V/G       | LOF                    | 0.06       |      |
|                 | TCGA-EE-A2MT-06 | met             | G/A         | 578         | Y/H       | tolerated              | 0.11       |      |
|                 | TCGA-FW-A3R5-06 | met             | G/A         | 649         | T/I       | tolerated              | 0.14       |      |
|                 | TCGA-EE-A2A2-06 | met             | G/A         | 382         | R/C       | tolerated              | 0.16       |      |
|                 | TCGA-EE-A3J3-06 | met             | G/A         | 275         | K/R       | tolerated              | 0.16       |      |
| Axin2           | TCGA-FW-A3R5-06 | met             | G/A         | 409         | L/F       | tolerated              | 0.16       |      |
|                 | TCGA-D9-A4Z6-01 | prim            | CACT/-      | 298-299     | -         | LOF                    |            |      |
| APC             | TCGA-EE-A3JI-06 | met             | G/A         | 425         | E/K       | tolerated              | 0.5        |      |
|                 | TCGA-FS-A1ZG-06 | met             | C/G         | 837         | S/*       | LOF                    |            |      |
|                 | TCGA-EE-A2GR-06 | met             | TG/GT       | 1036        | L/C       | harmful                | 0.02       |      |
|                 | TCGA-EE-A17X-06 | met             | G/T         | 1106        | G/*       | LOF                    |            |      |
|                 | TCGA-GN-A268-06 | met             | -/A         |             |           | LOF                    |            |      |
|                 | TCGA-D3-A51R-06 | met             | A/T         | 1659        | D/V       | harmful                | 0.01       |      |
|                 | TCGA-EE-A29E-06 | met             | C/T         | 2346        | P/S       | LOF                    | 0          |      |
|                 | TCGA-EE-A2MQ-06 | met             | C/T         | 2783        | P/L       | LOF                    | 0          |      |
|                 | TCGA-EE-A2M5-06 | met             | C/T         | 1361        | P/S       | harmful                | 0.01       |      |
|                 | TCGA-FW-A3R5-06 | met             | G/C         | 508         | L/F       | harmful                | 0.01       |      |
|                 | TCGA-ER-A198-06 | met             | C/T         | 1067        | Q/*       | LOF                    |            |      |
|                 | TCGA-D3-A5GU-06 | met             | A/T         | 1269        | I/L       | tolerated              | 0.26       |      |
|                 | TCGA-FS-A1ZA-06 | met             | C/T         | 1272        | S/L       | harmful                | 0.01       |      |
|                 | TCGA-FR-A3YN-06 | met             | C/T         | 1619        | P/L       | harmful                | 0.02       |      |
|                 | APC2            | TCGA-EE-A3J7-06 | met         | C/T         | 561       | S/F                    | harmful    | 0.01 |
|                 |                 | TCGA-EE-A29V-06 | met         | G/A         | 776       | G/S                    | tolerated  | 0.5  |
|                 |                 | TCGA-EE-A29E-06 | met         | G/A         | 859       | E/K                    | harmful    | 0    |
|                 |                 | TCGA-FW-A3R5-06 | met         | G/A         | 367       | E/K                    | harmful    | 0.02 |
|                 |                 | TCGA-FS-A1ZA-06 | met         | A/G         | 459       | N/S                    | tolerated  | 0.1  |
| TCGA-ER-A3EV-06 |                 | met             | C/T         | 658         | R/C       | harmful                | 0          |      |
| TCGA-DA-A3F3-06 |                 | met             | G/A         | 335         | R/W       | harmful                | 0          |      |
| TCGA-EE-A2GR-06 |                 | met             | CC/TT       | 363         | S/F       | harmful                | 0          |      |
| DVL2            | TCGA-EE-A20H-06 | met             | C/T         | 530-531     | AP/AS     | tolerated              | 0.51       |      |
|                 | TCGA-EE-A29H-06 | met             | C/T         | 664         | P/L       | tolerated              | 0.51       |      |
|                 | TCGA-FW-A3R5-06 | met             | C/T         | 673         | P/L       | tolerated              | 0.69       |      |
| DVL3            | TCGA-EE-A29E-06 | met             | CC/AA       | 1581-1582   | EE/D*     | LOF                    |            |      |
|                 | TCGA-D3-A3C6-06 | met             | CC/AA       | 1545        | R/L       | tolerated              | 0.9        |      |
| LRP6            | TCGA-D3-A1Q1-06 | met             | CC/AA       | 1482        | P/N       | harmful                | 0.02       |      |
|                 | TCGA-EE-A29E-06 | met 2           | CC/AA       | 1406        | G/L       | tolerated              | 0.37       |      |
|                 | TCGA-FS-A1ZJ-06 | met             | CG/AT       | 1244        | G/L       | harmful                | 0.03       |      |
|                 | TCGA-FW-A5DX-01 | prim            | G/T         | 1231        | P/Q       | harmful                | 0          |      |
|                 | TCGA-FS-A1ZR-06 | met             | CG/AT       | 1136        | R/M       | harmful                | 0          |      |
|                 | TCGA-EB-A24C-01 | prim            | CG/AT       | 1123        | L/I       | harmful                | 0.04       |      |
|                 | TCGA-D3-A1Q6-06 | met             | CC/AA       | 1081        | P/S       | tolerated              | 0.07       |      |
|                 | TCGA-D3-A3C6-06 | met             | GG/TT       | 1008        | P/H       | tolerated              | 0.12       |      |
|                 | TCGA-D9-A4Z3-01 | prim            | G/A         | 968         | R/M       | harmful                | 0.01       |      |
|                 | TCGA-ER-A3PL-06 | met             | TC/AT       | 889         | G/L       | harmful                | 0          |      |
|                 | TCGA-EE-A29B-06 | met             | C/T         | 750         | P/Q       | harmful                | 0          |      |
|                 | TCGA-D3-A1Q1-06 | met             | CC/AA       | 634         | L/F       | harmful                | 0.01       |      |
|                 | TCGA-FS-A1ZN-01 | prim            | CG/AT       | 570         | D/I       | harmful                | 0          |      |
|                 | TCGA-GN-A262-06 | met             | CC/AA       | 542         | G/D       | tolerated              | 0.1        |      |
|                 | TCGA-EE-A184-06 | met             | GG/TT       | 523         | G/L       | harmful                | 0.05       |      |
|                 | TCGA-EE-A2MD-06 | met             | GG/TT       | 449         | R/M       | harmful                | 0          |      |
|                 | TCGA-FW-A3R5-06 | met             | G/A         | 157         | W/F       | harmful                | 0          |      |

|              |                             |      |       |           |       |           |      |
|--------------|-----------------------------|------|-------|-----------|-------|-----------|------|
| LRP5         | TCGA-BF-A1PZ-01             | prim | C/T   | 73        | S/F   | tolerated | 0.06 |
|              | TCGA-FS-A1ZK-06             | met  | G/A   | 96        | G/R   | tolerated | 0.09 |
|              | TCGA-EE-A17Y-06             | met  | G/A   | 96        | G/E   | tolerated | 0.08 |
|              | TCGA-EE-A2GR-06             | met  | C/T   | 419       | D/N   | harmful   | 0.02 |
|              | TCGA-EE-A20C-06             | met  | G/A   | 546       | P/S   | tolerated | 0.06 |
|              | TCGA-EE-A29V-06             | met  | GG/AA | 1094      | E/K   | tolerated | 0.1  |
|              | TCGA-FW-A3R5-06             | met  | C/T   | 1226      | H/Y   | harmful   | 0    |
|              | TCGA-EE-A2MS-06             | met  | G/A   | 1587      | E/K   | harmful   | 0.03 |
|              | TCGA-FW-A3R5-06             | met  | G/A   | 1612-1613 | TD/TN |           |      |
| LRP12        | TCGA-FW-A3R5-06             | met  | G/A   | 272       | S/F   | harmful   | 0    |
| GSK3b        | TCGA-EE-A2GR-06             | met  | CC/TT | 180       | R/Q   | LOF       | 0    |
|              | TCGA-EE-A2M5-06             | met  | C/T   | 102       | R/K   | tolerated | 0.21 |
| Wnt7a        | TCGA-EE-A2GO-06             | met  | G/A   | 78        | R/C   | harmful   | 0    |
|              | TCGA-D3-A51G-06             | met  | T/G   | 82        | W/*   | LOF       |      |
|              | TCGA-D9-A148-06             | met  | G/A   | 93        | F/L   | harmful   | 0.1  |
|              | TCGA-EE-A29E-06             | met  | G/A   | 96        | E/K   | harmful   | 0.4  |
|              | TCGA-FS-A1ZF-06             | met  | GG/AA | 155       | D/N   | harmful   | 0.2  |
|              | TCGA-EE-A29D-06             | met  | C/T   | 188-189   | GR/G* | LOF       |      |
|              | TCGA-EE-A3J7-06             | met  | C/T   | 208       | S/L   | harmful   | 0.2  |
|              | TCGA-EB-A431-01             | prim | A/G   | 263       | P/L   | harmful   | 0.3  |
|              | TCGA-EE-A29E-06             | met  | C/T   | 297       | T/P   | harmful   | 0    |
|              | TCGA-EE-A2A2-06             | met  | G/A   | 102       | R/W   | harmful   | 0    |
|              | TCGA-FW-A3R5-06             | met  | G/A   | 189       | R/*   | LOF       |      |
|              | TCGA-FS-A1ZK-06             | met  | G/A   | 329       | H/Y   | tolerated | 0.11 |
| Wnt7b        | TCGA-FW-A3R5-06             | met  | G/A   | 299       | P/L   | tolerated | 0.34 |
|              | TCGA-FW-A3R5-06             | met  | G/A   | 274       | S/L   | harmful   | 0    |
| Wnt3         | TCGA-EE-A3AG-06             | met  | CC/TT | 270-271   | TE/TK | tolerated |      |
|              | TCGA-EE-A20C-06             | met  | C/T   | 171       | E/K   | tolerated | 0.43 |
|              | TCGA-FW-A3R5-06             | met  | G/A   | 70        | A/V   | harmful   | 0.04 |
|              | TCGA-D3-A2JG-06             | met  | G/A   | 331       | G/S   | harmful   | 0    |
| Wnt1         | TCGA-EE-A3JI-06             | met  | G/A   | 113       | R/H   | tolerated | 0.1  |
| Wnt10a       | TCGA-EE-A2MT-06             | met  | C/T   | 325       | P/L   | tolerated | 0.53 |
| FZD3         | TCGA-EB-A440-01             | prim | C/A   | 166       | P/H   | harmful   | 0    |
|              | TCGA-FS-A4F0-06             | met  | G/T   | 168       | E/*   | LOF       |      |
| FZD9         | no mutations on this cohort |      |       |           |       |           |      |
| TCF1 (HNF1A) | TCGA-EE-A2GO-06             | met  | G/A   | 76        | D/N   | LOF       | 0    |
|              | TCGA-D3-A1Q6-06             | met  | C/A   | 160       | A/D   | LOF       | 0    |
|              | TCGA-EE-A2MS-06             | met  | G/A   | 292       | G/E   | tolerated | 0.36 |
|              | TCGA-EE-A29V-06             | met  | G/A   | 200       | R/Q   | LOF       | 0.01 |
|              | TCGA-EE-A29E-06             | met  | G/A   | 234       | E/K   | tolerated | 0.1  |
|              | TCGA-FR-A3YO-06             | met  | C/T   | 57        | P/L   | harmful   | 0.03 |
|              | TCGA-EE-A2M6-06             | met  | C/T   | 28        | Q/*   | LOF       |      |
|              | TCGA-FW-A3R5-06             | met  | C/T   | 340       | P/L   | tolerated | 0.36 |
|              | TCGA-EE-A2MS-06             | met  | C/T   | 347       | P/S   | tolerated | 0.5  |
|              | TCGA-EE-A20C-06             | met  | C/T   | 68        | P/S   | GOF       | 0.46 |
| TCF12        | TCGA-EE-A2GO-06             | met  | C/T   | 68        | P/L   | GOF       | 0    |
|              | TCGA-D3-A51T-06             | met  | C/T   | 170       | H/Y   | GOF       | 0.02 |

SI table 3b Mutations in patients with T cell signature high

|        |                 | tumor source                | nt mutation | aa position | aa change | functional consequence | SIFT score |
|--------|-----------------|-----------------------------|-------------|-------------|-----------|------------------------|------------|
| CTNNB1 | TCGA-ER-A190-06 | met                         | A/G         |             | 41 T/A    | GOF                    | 0.01       |
|        | TCGA-D3-A2JN-06 | met                         | CC/TT       |             | 687 P/L   | tolerated              | 0.13       |
|        | TCGA-EE-A3AC-06 | met                         | C/T         |             | 545 Q/*   | LOF                    |            |
| Axin1  | TCGA-D3-A2JN-06 | met                         | G/A         |             | 805 R/*   | LOF                    |            |
|        | TCGA-ER-A194-01 | prim                        | A/C         |             | 77 S/F    | tolerated              | 0.5        |
|        | TCGA-D3-A2JP-06 | met                         | G/A         |             | 199 P/F   | harmful                | 0.03       |
| Axin2  | TCGA-EE-A20F-06 | met                         | G/-         |             | 494 -     | tolerated              | 0.7        |
|        | TCGA-EE-A2GC-06 | met                         | GG/AA       |             | 662 H/Y   | tolerated              | 0.6        |
|        | TCGA-EE-A2MJ-06 | met                         | AC/TT       |             | 202 S/K   | harmful                | 0          |
| APC    | TCGA-EE-A3AE-06 | met                         | G/A         |             | 475 S/L   | tolerated              | 0.3        |
|        | TCGA-D3-A3C8-06 | met                         | C/T         |             | 1189 S/L  | harmful                | 0.03       |
|        | TCGA-EE-A3JD-06 | met                         | AC/TT       | 1381-1382   | PL/PF     | LOF                    |            |
|        | TCGA-EE-A2M7-06 | met                         | C/T         |             | 1539 S/L  | tolerated              | 0.5        |
|        | TCGA-GN-A26C-01 | prim                        | C/T         |             | 1758 S/F  | tolerated              | 0.34       |
|        | TCGA-EE-A2GT-06 | met                         | C/T         |             | 1858 R/*  | LOF                    |            |
|        | TCGA-ER-A190-06 | met                         | C/T         |             | 2509 P/S  | tolerated              | 0.2        |
|        | TCGA-BF-A1Q0-01 | prim                        | C/T         |             | 2256 P/L  | tolerated              | 0.5        |
|        | TCGA-EE-A3J5-06 | met                         | C/T         |             | 741 A/V   | harmful                | 0.03       |
| APC2   | TCGA-ER-A19M-06 | met                         | C/T         |             | 2234 P/S  | harmful                | 0.01       |
|        | TCGA-D3-A2JD-06 | met                         | G/A         |             | 1763 G/E  | tolerated              | 0.86       |
|        | TCGA-ER-A19H-06 | met                         | G/A         |             | 1026 R/Q  | tolerated              | 0.5        |
| DVL2   | TCGA-EE-A3AE-06 | met                         | C/T         |             | 1047 P/L  | LOF                    | 0.06       |
|        | TCGA-BF-A5EQ-01 | prim                        | GG/AA       |             | 470 P/A   | tolerated              | 0.74       |
|        | TCGA-EE-A2GL-06 | met                         | G/C         | 245-246     | PR/PC     | LOF                    |            |
| DVL3   | TCGA-EE-A2GI-06 | met                         | A/-         |             | 246 -     | LOF                    |            |
|        | TCGA-D3-A3MR-06 | met                         | C/T         |             | 531 P/S   | tolerated              | 0.05       |
|        | TCGA-ER-A2NH-06 | met                         | G/A         |             | 1431 S/F  | harmful                | 0.01       |
| LRP6   | TCGA-EE-A2MR-06 | met                         | G/A         |             | 1286 P/L  | harmful                | 0          |
|        | TCGA-ER-A19S-06 | met                         | G/C         |             | 1074 T/I  | harmful                | 0.04       |
|        | TCGA-GN-A265-06 | met                         | CC/AA       |             | 933 T/R   | tolerated              | 0.55       |
|        | TCGA-GN-A265-06 | met                         | CC/AA       |             | 725 G/*   | LOF                    |            |
|        | TCGA-EE-A181-06 | met                         | G/A         |             | 597 G/L   | harmful                | 0          |
|        | TCGA-D9-A3Z1-06 | met                         | G/A         |             | 465 W/C   | harmful                | 0          |
|        | TCGA-ER-A2NH-06 | met                         | T/G         |             | 412 W/F   | harmful                | 0.02       |
|        | TCGA-HR-A2OG-01 | prim                        | C/A         |             | 280 P/S   | harmful                | 0.02       |
|        | TCGA-D3-A3C3-06 | met                         | G/A         |             | 246 S/F   | harmful                | 0.03       |
|        | TCGA-EE-A2ML-06 | met                         | C/A         | 157-158     | WG/C*     | LOF                    |            |
|        | TCGA-D9-A149-06 | met                         | CC/AA       |             | 115 E/D   | tolerated              | 0.16       |
|        | TCGA-EB-A551-01 | prim                        | G/A         |             | 112 G/D   | harmful                | 0          |
| LRP5   | TCGA-EE-A2MR-06 | met                         | G/A         |             | 340 A/V   | tolerated              | 0.33       |
|        | TCGA-DA-A1HV-06 | met                         | C/T         |             | 738 G/E   | tolerated              | 0.27       |
|        | TCGA-EE-A2MR-06 | met                         | G/A         |             | 844 D/N   | tolerated              | 0.41       |
|        | TCGA-EE-A2GI-06 | met                         | G/A         |             | 1112 I/M  | tolerated              | 0.11       |
|        | TCGA-EE-A2MR-06 | met                         | C/G         |             | 1305 C/Y  | harmful                | 0          |
|        | TCGA-EE-A183-06 | met                         | C/T         |             | 1576 P/S  | harmful                | 0.02       |
| LRP12  | TCGA-EB-A3XD-01 | prim                        | G/A         |             | 815 P/S   | tolerated              | 0.51       |
|        | TCGA-EE-A2MK-06 | met                         | G/A         |             | 746 R/Q   | tolerated              | 0.09       |
|        | TCGA-EE-A2GI-06 | met                         | C/T         |             | 674 P/S   | tolerated              | 0.14       |
|        | TCGA-EE-A3AE-06 | met                         | C/A         |             | 581 A/S   | harmful                | 0          |
|        | TCGA-EE-A3AC-06 | met                         | G/A         |             | 497 A/V   | harmful                | 0          |
|        | TCGA-D3-A51E-06 | met                         | T/C         |             | 483 E/G   | tolerated              | 0.32       |
|        | TCGA-EE-A2MJ-06 | met                         | C/T         |             | 282 G/E   | tolerated              | 0.1        |
|        | TCGA-EE-A2GC-06 | met                         | G/A         |             | 142 H/Y   | tolerated              | 0.13       |
|        | GSK3b           | no mutations in this cohort |             |             |           |                        |            |
| Wnt7a  | TCGA-EE-A2MJ-06 | met                         | A/G         |             | 159 G/D   | harmful                | 0          |
|        | TCGA-EE-A2GI-06 | met                         | C/T         |             | 236 V/A   | tolerated              | 0.2        |
|        | TCGA-ER-A194-01 | prim                        | G/A         |             | 315 T/I   | harmful                | 0.03       |
| Wnt7b  | TCGA-D3-A3C8-06 | met                         | C/T         |             | 193 E/K   | tolerated              | 1          |
|        | TCGA-EE-A3J5-06 | met                         | C/T         |             | 8 W/*     | LOF                    |            |

|              |                 |                             |       |         |         |           |      |  |
|--------------|-----------------|-----------------------------|-------|---------|---------|-----------|------|--|
| Wnt3         | TCGA-GN-A26C-01 | prim                        | G/A   |         | 347 R/C | harmful   | 0.01 |  |
|              | TCGA-BF-A5EQ-01 | prim                        | T/A   |         | 297 D/N | harmful   | 0.01 |  |
|              | TCGA-EE-A183-06 | met                         | C/T   |         | 96 D/N  | tolerated | 1    |  |
|              | TCGA-EE-A2MR-06 | met                         | C/T   |         | 94 I/L  | tolerated | 0.37 |  |
| Wnt1         | TCGA-D9-A3Z1-06 | met                         | G/C   |         | 181 G/A | tolerated | 0.15 |  |
| Wnt10a       | TCGA-DA-A1HV-06 | met                         | C/T   |         | 8 P/S   | harmful   | 0    |  |
|              | TCGA-EE-A2MR-06 | met                         | CC/TT | 359-360 | GR/GC   | GOF       |      |  |
|              | TCGA-EE-A3J5-06 | met                         | G/A   |         | 370 D/N | harmful   | 0.01 |  |
| FZD3         |                 | no mutations in this cohort |       |         |         |           |      |  |
| FZD9         | TCGA-EB-A430-01 | met                         | C/T   |         | 480 A/V | harmful   | 0.03 |  |
|              | TCGA-ER-A2NC-06 | met                         | C/T   |         | 498 S/L | tolerated | 0.19 |  |
| TCF1 (HNF1A) | TCGA-GF-A4EO-06 | met                         | G/A   |         | 40 G/E  | tolerated | 0.6  |  |
|              | TCGA-D9-A1JW-06 | met                         | G/A   |         | 79 E/K  | tolerated | 0.36 |  |
|              | TCGA-EB-A4OY-01 | prim                        | C/T   |         | 174 A/V | tolerated | 0.5  |  |
|              | TCGA-D3-A5GS-06 | met                         | G/A   |         | 202 M/I | LOF       | 0    |  |
| TCF12        | TCGA-EE-A181-06 | met                         | C/T   |         | 99 P/S  | tolerated | 0.76 |  |
|              | TCGA-EE-A3JD-06 | met                         | C/T   |         | 386 S/F | harmful   | 0    |  |

SI table 3c Patient ID and indications for active b-catenin signalling

T cell signature low patients

|                  | CTNNB1 mutation | APC/APC2/axin1 /axin2 mutation | elevated Wnt7b expression | elevated FZD3 expression | elevated CTNNB1 expression | listed as: |
|------------------|-----------------|--------------------------------|---------------------------|--------------------------|----------------------------|------------|
| TCGA-EE-A20H-06A |                 | 1                              | 1                         |                          |                            | Inhib      |
| TCGA-EE-A3J7-06A |                 | 1                              | 1                         |                          |                            | Inhib      |
| TCGA-GN-A262-06A |                 |                                |                           | 1                        |                            | FZD        |
| TCGA-D3-A1QA-06A | 1               |                                |                           | 1                        | 1                          | CTNNB1 mut |
| TCGA-D3-A2JG-06A |                 |                                | 1                         | 1                        | 1                          | Wnt        |
| TCGA-ER-A19L-06A |                 |                                |                           | 1                        |                            | FZD        |
| TCGA-D3-A1Q1-06A |                 |                                |                           | 1                        | 1                          | CTNNB1 exp |
| TCGA-EE-A185-06A |                 |                                | 1                         | 1                        | 1                          | Wnt        |
| TCGA-EE-A3AD-06A |                 | 1                              | 1                         | 1                        | 1                          | Inhib      |
| TCGA-ER-A2NE-06A | 1               |                                |                           |                          | 1                          | CTNNB1 mut |
| TCGA-ER-A3PL-06A |                 |                                | 1                         | 1                        | 1                          | Wnt        |
| TCGA-FS-A1YW-06A |                 |                                |                           |                          | 1                          | CTNNB1 exp |
| TCGA-FS-A1ZK-06A |                 | 1                              |                           | 1                        | 1                          | Inhib      |
| TCGA-FS-A1ZU-06A | 1               |                                |                           |                          | 1                          | CTNNB1 mut |
| TCGA-FS-A4FB-06A |                 | 1                              |                           | 1                        | 1                          | Inhib      |
| TCGA-GN-A26D-06A |                 |                                |                           | 1                        | 1                          | FZD        |
| TCGA-EE-A17Z-06A |                 |                                | 1                         | 1                        |                            | Wnt        |
| TCGA-EE-A180-06A | 1               |                                |                           | 1                        | 1                          | CTNNB1 mut |
| TCGA-EE-A17Y-06A |                 | 1                              | 1                         | 1                        |                            | Inhib      |
| TCGA-EE-A29A-06A | 1               |                                | 1                         |                          |                            | CTNNB1 mut |
| TCGA-EE-A29R-06A |                 |                                |                           | 1                        |                            | FZD        |
| TCGA-EE-A2GO-06A |                 | 1                              | 1                         | 1                        |                            | Inhib      |
| TCGA-FS-A4F9-06A | 1               |                                |                           | 1                        |                            | CTNNB1 mut |
| TCGA-D3-A1Q5-06A | 1               |                                | 1                         | 1                        |                            | CTNNB1 mut |
| TCGA-DA-A1I7-06A |                 |                                | 1                         | 1                        |                            | Wnt        |
| TCGA-EE-A2MM-06A |                 |                                |                           |                          | 1                          | CTNNB1 exp |
| TCGA-EE-A3AG-06A |                 |                                | 1                         | 1                        |                            | Wnt        |
| TCGA-EE-A3J4-06A |                 |                                |                           | 1                        | 1                          | Fzd        |
| TCGA-EE-A3JI-06A |                 | 1                              |                           |                          | 1                          | TCF        |
| TCGA-FS-A1ZC-06A |                 |                                | 1                         |                          |                            | 0 Wnt      |
| TCGA-FS-A1ZD-06A |                 |                                | 1                         | 1                        | 1                          | Wnt        |
| TCGA-FS-A4F0-06A |                 |                                |                           | 1                        | 0                          | FZD        |
| TCGA-GN-A268-06A |                 | 1                              |                           | 1                        | 1                          | Inhib      |
| TCGA-D3-A1Q6-06A |                 | 1                              | 1                         | 1                        | 0                          | TCF        |
| TCGA-D3-A3ML-06A |                 |                                |                           |                          | 1                          | CTNNB1 exp |
| TCGA-D3-A51G-06A |                 |                                | 1                         |                          | 0                          | Wnt        |
| TCGA-DA-A1I8-06A |                 |                                | 1                         | 1                        | 0                          | Wnt        |
| TCGA-DA-A3F5-06A |                 |                                | 1                         | 1                        | 0                          | Wnt        |
| TCGA-GF-A30T-06A |                 |                                | 1                         |                          | 0                          | Wnt        |
| TCGA-EE-A2GN-06A |                 |                                |                           | 1                        | 1                          | Fzd        |
| TCGA-FS-A1Z3-06A |                 |                                |                           | 1                        | 1                          | Fzd        |
| TCGA-FW-A3I3-06A |                 |                                | 1                         | 1                        | 0                          | Wnt        |
| TCGA-EE-A2GR-06A |                 | 1                              |                           | 1                        | 1                          | Inhib      |
| TCGA-FS-A1ZJ-06A |                 |                                |                           | 1                        | 1                          | Fzd        |

T cell signature high patients

|                 | CTNNB1 mutation | APC/APC2/axin1 /axin2 mutation | elevated Wnt7b expression | elevated FZD3 expression | elevated CTNNB1 expression | listed as: |
|-----------------|-----------------|--------------------------------|---------------------------|--------------------------|----------------------------|------------|
| TCGA-D3-A5GS-06 |                 | 1                              |                           |                          |                            | Inhib      |
| TCGA-EE-A2GT-06 |                 | 1                              |                           |                          |                            | Inhib      |
| TCGA-EE-A3AE-06 |                 | 1                              |                           |                          |                            | Inhib      |
| TCGA-EE-A3JD-06 |                 | 1                              |                           |                          |                            | Inhib      |
| TCGA-D3-A2J8-06 |                 |                                | 1                         |                          |                            | Wnt7b      |
| TCGA-D3-A2JN-06 |                 | 1                              |                           |                          |                            | Inhib      |
| TCGA-D3-A2JP-06 |                 | 1                              |                           |                          |                            | Inhib      |
| TCGA-D3-A3BZ-06 |                 |                                |                           |                          | 1                          | CTNNB1 exp |
| TCGA-D3-A3C8-06 |                 | 1                              | 1                         |                          |                            | Inhib      |
| TCGA-D9-A149-06 | 1               |                                |                           | 1                        |                            | CTNNB1 mut |
| TCGA-DA-A1HW-06 |                 |                                |                           | 1                        |                            | FZD3       |
| TCGA-DA-A1I1-06 |                 |                                |                           | 1                        |                            | FZD3       |
| TCGA-DA-A1IB-06 |                 |                                | 1                         |                          |                            | Wnt7b      |
| TCGA-EE-A2MC-06 |                 |                                | 1                         |                          |                            | Wnt7b      |
| TCGA-EE-A2MR-06 |                 |                                | 1                         |                          |                            | Wnt7b      |
| TCGA-EE-A2MU-06 |                 |                                | 1                         |                          |                            | Wnt7b      |
| TCGA-EE-A3AE-06 |                 |                                |                           |                          | 1                          | CTNNB1 exp |
| TCGA-ER-A193-06 |                 |                                | 1                         |                          |                            | Wnt7b      |
| TCGA-ER-A197-06 |                 |                                | 1                         |                          |                            | Wnt7b      |
| TCGA-ER-A19A-06 |                 |                                | 1                         |                          |                            | Wnt7b      |
| TCGA-ER-A19H-06 |                 |                                |                           | 1                        |                            | FZD3       |
| TCGA-ER-A19M-06 |                 |                                | 1                         |                          |                            | Wnt7b      |
| TCGA-ER-A19O-06 | 1               |                                |                           |                          |                            | CTNNB1 mut |
| TCGA-ER-A2NG-06 |                 |                                | 1                         |                          |                            | Wnt7b      |
| TCGA-FS-A1ZH-06 |                 |                                | 1                         |                          |                            | Wnt7b      |
| TCGA-FS-A1ZM-06 |                 |                                | 1                         |                          |                            | Wnt7b      |
| TCGA-FS-A1ZP-06 |                 |                                |                           | 1                        |                            | FZD3       |
| TCGA-FS-A1ZW-06 |                 |                                |                           | 1                        |                            | FZD3       |

SI table 4a Gene array data mouse tumor

| TargetID  | ProbelID | BrafV600E/PTEN |        | BRafV600E/PTEN/CAT-STA |         |         | two-way ANOVA |        |
|-----------|----------|----------------|--------|------------------------|---------|---------|---------------|--------|
|           |          | mean           | SD     | mean                   | SD      | FC      | p-value       |        |
| UPB1      | 4760092  |                | 2.55   | 2.39                   | 326.73  | 198.51  | 128.13 **     | 0.0098 |
| UPB1      | 1470626  |                | 13.00  | 5.23                   | 778.65  | 468.23  | 59.90 **      | 0.0045 |
| KRT2      | 10050    |                | 10.23  | 8.28                   | 610.98  | 832.08  | 59.75 **      | 0.0051 |
| MET       | 3800192  |                | 0.85   | 4.13                   | 43.13   | 30.78   | 50.74 **      | 0.0095 |
| UPB1      | 4040376  |                | 11.88  | 2.96                   | 506.85  | 302.15  | 42.68 *       | 0.0207 |
| SP5       | 4290300  |                | 3.95   | 6.05                   | 155.75  | 149.93  | 39.43 **      | 0.0091 |
| OTTMUSGC  | 6200609  |                | 1.78   | 5.41                   | 55.40   | 36.54   | 31.21 **      | 0.001  |
| GLRB      | 1300139  |                | 1.08   | 3.31                   | 33.00   | 22.06   | 30.70 *       | 0.05   |
| BC020108  | 4040307  |                | 5.55   | 4.57                   | 93.40   | 55.83   | 16.83 **      | 0.0041 |
| LIX1      | 1030324  |                | 2.85   | 2.62                   | 42.70   | 23.26   | 14.98 *       | 0.0145 |
| BMP15     | 1850450  |                | 27.08  | 25.94                  | 401.48  | 252.30  | 14.83 **      | 0.0029 |
| ARSI      | 5270619  |                | 8.05   | 6.63                   | 118.35  | 73.70   | 14.70 ***     | 0.0003 |
| TAGLN3    | 4730474  |                | 29.55  | 33.87                  | 395.53  | 272.28  | 13.38 **      | 0.0036 |
| GDF15     | 650524   |                | 23.30  | 15.04                  | 290.43  | 172.19  | 12.46 *       | 0.033  |
| GPR143    | 3170048  |                | 24.80  | 20.49                  | 292.80  | 197.12  | 11.81 *       | 0.0324 |
| MLANA     | 1300647  |                | 839.68 | 565.55                 | 9837.28 | 4373.53 | 11.72 ****    | 0.0001 |
| PKD2L1    | 7150008  |                | 3.98   | 4.57                   | 42.90   | 26.77   | 10.79 *       | 0.0169 |
| CPXM2     | 6350053  |                | 4.93   | 6.09                   | 52.80   | 24.89   | 10.72 **      | 0.0033 |
| OMG       | 1850274  |                | 45.28  | 18.45                  | 479.90  | 226.61  | 10.60 ***     | 0.0006 |
| COL9A2    | 3420156  |                | 35.23  | 15.30                  | 368.45  | 235.03  | 10.46 **      | 0.0079 |
| AI593442  | 4230768  |                | 8.28   | 7.21                   | 86.13   | 43.76   | 10.41 *       | 0.011  |
| OCA2      | 150681   |                | 36.75  | 35.02                  | 375.40  | 169.74  | 10.21 **      | 0.007  |
| MC1R      | 2140519  |                | 34.88  | 18.78                  | 354.78  | 250.36  | 10.17 *       | 0.0108 |
| FRAS1     | 2000674  |                | 5.08   | 1.96                   | 51.45   | 32.13   | 10.14 **      | 0.0045 |
| GBX2      | 6580138  |                | 18.53  | 10.72                  | 182.88  | 111.74  | 9.87 **       | 0.0048 |
| GPR158    | 4570324  |                | 5.93   | 6.00                   | 58.10   | 38.30   | 9.81 **       | 0.0014 |
| 2300006NC | 3140327  |                | 29.68  | 34.89                  | 288.53  | 175.31  | 9.72 *        | 0.0388 |
| CRYBB1    | 6480008  |                | 4.25   | 3.78                   | 40.88   | 19.96   | 9.62 *        | 0.0246 |
| FAM19A4   | 3290731  |                | 42.80  | 25.14                  | 407.55  | 269.50  | 9.52 **       | 0.0037 |
| RPS6KL1   | 3800327  |                | 6.23   | 5.97                   | 57.33   | 35.96   | 9.21 **       | 0.0017 |
| P2RY12    | 1440050  |                | 25.13  | 6.53                   | 225.83  | 53.90   | 8.99 ***      | 0.0006 |
| 9930021D1 | 540487   |                | 22.63  | 26.22                  | 194.30  | 70.92   | 8.59 **       | 0.0032 |
| NOTUM     | 1820433  |                | 7.40   | 2.50                   | 60.83   | 37.62   | 8.22 **       | 0.0011 |
| MCOLN3    | 50487    |                | 53.60  | 28.61                  | 439.65  | 252.70  | 8.20 **       | 0.0021 |
| NPY       | 160494   |                | 194.80 | 48.95                  | 1578.50 | 785.93  | 8.10 **       | 0.0074 |
| TYRP1     | 110646   |                | 112.03 | 73.48                  | 869.70  | 448.29  | 7.76 **       | 0.0049 |
| OTTMUSGC  | 6110209  |                | 88.43  | 113.92                 | 678.58  | 413.77  | 7.67 **       | 0.006  |
| TYR       | 1690379  |                | 20.50  | 17.45                  | 154.40  | 108.90  | 7.53 *        | 0.0214 |
| SLC45A2   | 1570110  |                | 120.08 | 118.63                 | 875.15  | 633.66  | 7.29 **       | 0.005  |
| TSPAN10   | 4760360  |                | 94.13  | 68.51                  | 668.38  | 397.00  | 7.10 **       | 0.0074 |
| A030010K2 | 7320386  |                | 96.35  | 130.84                 | 679.85  | 416.43  | 7.06 **       | 0.0065 |
| TYRP1     | 2260215  |                | 93.98  | 55.86                  | 655.63  | 367.62  | 6.98 **       | 0.0088 |
| GPNMB     | 4040292  |                | 24.35  | 17.58                  | 167.40  | 91.81   | 6.87 *        | 0.014  |
| GCG       | 3140524  |                | 12.45  | 8.71                   | 85.38   | 44.05   | 6.86 *        | 0.0171 |
| SLC45A2   | 780367   |                | 182.48 | 124.70                 | 1250.08 | 528.40  | 6.85 *        | 0.0381 |
| KCNE1     | 2190112  |                | 5.85   | 10.16                  | 38.70   | 31.11   | 6.62 *        | 0.0437 |
| SLC45A2   | 7330270  |                | 69.58  | 62.48                  | 455.88  | 369.86  | 6.55 **       | 0.0021 |
| PLA2G2E   | 5820768  |                | 8.50   | 11.05                  | 55.63   | 32.22   | 6.54 **       | 0.0039 |
| ENPP6     | 7000519  |                | 37.48  | 16.74                  | 244.40  | 161.51  | 6.52 ***      | 0.0004 |
| CAR14     | 5870220  |                | 156.45 | 103.49                 | 981.93  | 481.30  | 6.28 **       | 0.0022 |
| SYNGR1    | 7210114  |                | 7.08   | 9.04                   | 44.00   | 19.01   | 6.22 *        | 0.0234 |
| BACE2     | 870743   |                | 27.90  | 12.67                  | 172.80  | 99.60   | 6.19 *        | 0.0128 |
| UNC5C     | 2230603  |                | 19.75  | 19.89                  | 121.28  | 59.88   | 6.14 ***      | 0.0009 |
| CORIN     | 4830148  |                | 29.13  | 25.43                  | 176.83  | 99.19   | 6.07 *        | 0.0112 |
| KNDC1     | 6960376  |                | 17.43  | 9.13                   | 105.35  | 63.49   | 6.05 **       | 0.0041 |
| GPNMB     | 1410735  |                | 32.33  | 24.04                  | 193.25  | 77.98   | 5.98 **       | 0.0057 |

|           |         |         |         |         |         |         |        |
|-----------|---------|---------|---------|---------|---------|---------|--------|
| TYRP1     | 1470133 | 343.53  | 264.73  | 2042.15 | 902.71  | 5.94 ** | 0.0011 |
| LOC669001 | 580044  | 8.58    | 6.19    | 50.25   | 28.25   | 5.86 *  | 0.0106 |
| TNFRSF19  | 3400215 | 7.28    | 5.86    | 42.43   | 25.00   | 5.83 *  | 0.031  |
| PLLP      | 430278  | 6.75    | 2.64    | 38.80   | 16.96   | 5.75 *  | 0.0491 |
| TRPM6     | 5700364 | 13.58   | 5.35    | 76.45   | 40.16   | 5.63 *  | 0.0396 |
| MGLL      | 6660719 | 163.85  | 25.82   | 922.70  | 796.25  | 5.63 ** | 0.0048 |
| TPSAB1    | 5130553 | 75.90   | 31.00   | 427.15  | 423.83  | 5.63 ** | 0.0051 |
| KRT75     | 5810142 | 7.95    | 10.90   | 44.48   | 33.72   | 5.59 *  | 0.025  |
| EMID2     | 780491  | 281.98  | 141.40  | 1570.63 | 938.79  | 5.57 *  | 0.0125 |
| TNFRSF19  | 2060546 | 105.83  | 43.17   | 583.23  | 300.37  | 5.51 *  | 0.0256 |
| SYNGR1    | 730315  | 9.95    | 7.58    | 54.18   | 29.90   | 5.44 ** | 0.0067 |
| KRTAP4-7  | 4040703 | 247.95  | 345.44  | 1324.60 | 977.48  | 5.34 *  | 0.0365 |
| EMID1     | 1430079 | 109.40  | 24.87   | 581.20  | 291.73  | 5.31 *  | 0.0274 |
| PLXDC1    | 7570619 | 81.25   | 19.15   | 430.95  | 203.10  | 5.30 ** | 0.0053 |
| AI507495  | 7040634 | 88.65   | 138.44  | 451.28  | 290.44  | 5.09 ** | 0.0039 |
| KRTAP16-5 | 3990382 | 8.60    | 16.23   | 43.45   | 35.23   | 5.05 *  | 0.0324 |
| AXIN2     | 1440630 | 183.15  | 37.91   | 903.00  | 468.81  | 4.93 ** | 0.0074 |
| CRYBA4    | 7050255 | 204.00  | 252.79  | 992.95  | 568.89  | 4.87 ** | 0.0034 |
| WNK4      | 1850255 | 11.98   | 3.82    | 58.23   | 26.63   | 4.86 ** | 0.0046 |
| OTTMUSGC  | 5220008 | 93.73   | 129.58  | 454.73  | 289.99  | 4.85 ** | 0.004  |
| 2810003C1 | 3610239 | 349.68  | 27.75   | 1641.73 | 813.08  | 4.70 *  | 0.0123 |
| SYNGR1    | 1240154 | 137.28  | 84.62   | 643.68  | 309.05  | 4.69 *  | 0.018  |
| KRT84     | 1510301 | 43.15   | 28.11   | 199.25  | 115.28  | 4.62 ** | 0.0074 |
| 6430548M  | 1190167 | 182.58  | 29.68   | 836.38  | 343.60  | 4.58 *  | 0.0148 |
| SLC25A34  | 1990327 | 38.20   | 44.77   | 174.55  | 100.49  | 4.57 *  | 0.0191 |
| VTN       | 6770671 | 33.15   | 3.12    | 149.10  | 71.19   | 4.50 *  | 0.0462 |
| ASPHD2    | 5560670 | 36.08   | 6.79    | 162.20  | 76.83   | 4.50 *  | 0.0302 |
| 2310007B0 | 4730202 | 104.90  | 100.18  | 467.70  | 305.44  | 4.46 ** | 0.0039 |
| KRT26     | 6420070 | 166.38  | 261.36  | 737.95  | 516.76  | 4.44 ** | 0.0077 |
| APLP1     | 2030435 | 20.30   | 10.07   | 90.03   | 59.04   | 4.43 *  | 0.0226 |
| A030005K1 | 4880014 | 48.18   | 77.82   | 212.53  | 226.57  | 4.41 ** | 0.0048 |
| 4931406C0 | 630576  | 307.15  | 174.78  | 1342.88 | 602.33  | 4.37 *  | 0.0442 |
| MGLL      | 2350451 | 915.28  | 262.29  | 3992.23 | 2163.13 | 4.36 *  | 0.038  |
| KRTAP16-8 | 540253  | 213.08  | 320.48  | 927.55  | 585.45  | 4.35 ** | 0.0079 |
| TRPM6     | 830608  | 11.38   | 6.14    | 49.50   | 28.64   | 4.35 *  | 0.0193 |
| SLC7A8    | 6550687 | 204.45  | 74.11   | 887.35  | 428.03  | 4.34 *  | 0.011  |
| CITED1    | 3990292 | 10.58   | 10.11   | 45.83   | 29.79   | 4.33 *  | 0.0305 |
| KRT71     | 3060095 | 1503.40 | 2103.31 | 6389.78 | 3895.64 | 4.25 ** | 0.0011 |
| FSTL4     | 4670719 | 100.68  | 69.48   | 427.13  | 318.72  | 4.24 ** | 0.0093 |
| TPD52L1   | 3460224 | 55.65   | 30.77   | 234.23  | 109.41  | 4.21 ** | 0.0022 |
| ALOX12    | 4180717 | 44.35   | 27.88   | 184.48  | 94.30   | 4.16 *  | 0.0161 |
| RAMP3     | 4280224 | 29.85   | 8.91    | 123.50  | 62.29   | 4.14 ** | 0.0023 |
| GABRP     | 2450093 | 20.68   | 23.19   | 85.30   | 73.55   | 4.13 *  | 0.0344 |
| A730017C2 | 830358  | 10.60   | 6.68    | 43.50   | 25.01   | 4.10 *  | 0.0434 |
| SLC6A13   | 830445  | 20.00   | 17.11   | 81.65   | 33.94   | 4.08 *  | 0.0436 |
| KRT27     | 6200671 | 1558.28 | 2135.63 | 6274.48 | 3683.49 | 4.03 ** | 0.0016 |
| JAM2      | 3840703 | 11.55   | 7.81    | 46.23   | 27.32   | 4.00 *  | 0.0333 |
| FOXE1     | 2260040 | 13.85   | 22.71   | 55.35   | 45.08   | 4.00 *  | 0.0109 |
| BACE2     | 3390221 | 500.03  | 150.00  | 1994.10 | 943.53  | 3.99 ** | 0.0039 |
| SLC7A8    | 3870681 | 41.83   | 18.01   | 166.03  | 70.48   | 3.97 *  | 0.0327 |
| GLT25D2   | 1510722 | 22.60   | 3.78    | 89.13   | 46.55   | 3.94 *  | 0.0295 |
| ABAT      | 2120601 | 25.58   | 4.25    | 100.13  | 37.35   | 3.91 *  | 0.0148 |
| GSTA2     | 3710465 | 46.43   | 12.05   | 181.15  | 81.24   | 3.90 *  | 0.0206 |
| ADAMTSL4  | 130192  | 101.15  | 10.96   | 392.78  | 141.99  | 3.88 *  | 0.02   |
| TRIM62    | 1260040 | 42.93   | 19.67   | 163.88  | 60.19   | 3.82 *  | 0.0376 |
| CLIC6     | 7040471 | 42.58   | 28.07   | 162.38  | 58.83   | 3.81 *  | 0.0394 |
| PCOLCE2   | 1230575 | 49.55   | 15.47   | 188.70  | 82.83   | 3.81 *  | 0.0168 |
| 2310043LO | 5570608 | 179.85  | 272.20  | 681.43  | 429.60  | 3.79 *  | 0.0191 |
| DNAJC6    | 2070594 | 89.08   | 31.25   | 335.43  | 149.56  | 3.77 *  | 0.0492 |

|           |         |         |         |          |         |           |        |
|-----------|---------|---------|---------|----------|---------|-----------|--------|
| LOC100047 | 4180437 | 1737.85 | 512.67  | 6495.73  | 2576.01 | 3.74 **   | 0.0015 |
| PIP5K1B   | 1090239 | 32.45   | 25.32   | 121.00   | 35.97   | 3.73 **   | 0.0039 |
| HHATL     | 1940132 | 115.23  | 81.07   | 428.80   | 174.00  | 3.72 *    | 0.0124 |
| PLXDC1    | 2450500 | 225.50  | 49.94   | 838.25   | 352.59  | 3.72 *    | 0.0223 |
| RG57BP    | 1170709 | 195.35  | 70.72   | 713.73   | 393.91  | 3.65 *    | 0.0155 |
| MGLL      | 5310328 | 1142.80 | 307.03  | 4140.25  | 2182.32 | 3.62 *    | 0.0432 |
| MSRB2     | 5960341 | 30.95   | 10.33   | 112.08   | 43.79   | 3.62 **   | 0.0081 |
| RAMP3     | 1740072 | 23.78   | 6.29    | 85.90    | 40.37   | 3.61 *    | 0.042  |
| E130012A1 | 540398  | 196.45  | 30.81   | 704.30   | 337.20  | 3.59 *    | 0.0177 |
| SDK1      | 380463  | 47.58   | 10.21   | 170.43   | 86.36   | 3.58 *    | 0.0347 |
| KRT31     | 6100138 | 223.40  | 334.03  | 797.75   | 534.43  | 3.57 *    | 0.032  |
| TPD52L1   | 5700433 | 58.85   | 30.02   | 209.05   | 98.16   | 3.55 **   | 0.0099 |
| PADI3     | 6590504 | 13.95   | 21.00   | 49.55    | 42.16   | 3.55 *    | 0.0289 |
| GNG13     | 2650743 | 15.28   | 22.72   | 54.18    | 53.25   | 3.55 *    | 0.017  |
| TCHHL1    | 6760564 | 255.63  | 380.44  | 902.75   | 744.87  | 3.53 *    | 0.0159 |
| KRT82     | 6560333 | 17.83   | 22.09   | 62.23    | 54.51   | 3.49 **   | 0.0065 |
| JAM2      | 7570673 | 15.58   | 11.39   | 54.28    | 39.14   | 3.48 *    | 0.0176 |
| SOX8      | 2450279 | 51.70   | 40.10   | 180.15   | 70.51   | 3.48 *    | 0.0273 |
| STRA6     | 1300475 | 61.50   | 23.94   | 213.45   | 70.74   | 3.47 **   | 0.0091 |
| SYTL2     | 3710563 | 246.03  | 100.94  | 851.85   | 305.57  | 3.46 *    | 0.0238 |
| PRL2C4    | 6590435 | 469.15  | 515.90  | 1603.73  | 1752.51 | 3.42 *    | 0.0276 |
| LAMA1     | 1190431 | 16.60   | 7.69    | 56.60    | 28.45   | 3.41 *    | 0.0141 |
| GPR137B   | 2650768 | 67.83   | 5.49    | 226.53   | 164.24  | 3.34 **   | 0.0064 |
| DAPL1     | 1570288 | 19.33   | 21.38   | 64.40    | 35.67   | 3.33 **   | 0.0057 |
| EPHB1     | 1940458 | 55.95   | 17.11   | 185.05   | 74.99   | 3.31 *    | 0.0265 |
| CCL11     | 830273  | 59.13   | 21.63   | 192.65   | 101.82  | 3.26 *    | 0.0218 |
| KRT34     | 730255  | 1516.73 | 2234.91 | 4883.80  | 3167.99 | 3.22 *    | 0.0234 |
| SEPP1     | 7160603 | 570.90  | 194.09  | 1810.20  | 840.37  | 3.17 *    | 0.0162 |
| WWC1      | 130338  | 75.28   | 6.27    | 238.35   | 95.10   | 3.17 **   | 0.0051 |
| EBF2      | 6940044 | 205.75  | 71.52   | 650.25   | 199.41  | 3.16 *    | 0.0375 |
| KRT33A    | 6110767 | 622.58  | 962.87  | 1964.80  | 1229.10 | 3.16 **   | 0.0093 |
| 2310033E0 | 6380022 | 76.10   | 71.41   | 237.50   | 143.92  | 3.12 **   | 0.0056 |
| DTX4      | 1300300 | 153.65  | 38.52   | 476.15   | 203.22  | 3.10 *    | 0.0101 |
| OTOP2     | 4210445 | 22.50   | 28.04   | 69.73    | 61.08   | 3.10 **   | 0.0038 |
| KRTAP9-3  | 6590279 | 157.75  | 235.12  | 488.78   | 308.64  | 3.10 **   | 0.0083 |
| GJC2      | 2360332 | 19.35   | 6.73    | 59.70    | 29.77   | 3.09 *    | 0.0133 |
| MSRB2     | 130300  | 59.23   | 23.33   | 181.00   | 68.18   | 3.06 *    | 0.0363 |
| P2RY14    | 1240538 | 155.68  | 40.63   | 472.98   | 218.47  | 3.04 *    | 0.0114 |
| GPNMB     | 4670228 | 4408.58 | 2500.74 | 13356.95 | 3448.95 | 3.03 **** | 0.0001 |
| MCF2L     | 4810546 | 319.03  | 52.16   | 960.03   | 386.55  | 3.01 *    | 0.0169 |
| SYT9      | 6380750 | 63.08   | 13.26   | 189.28   | 75.79   | 3.00 *    | 0.0301 |
| FGFBP3    | 3130661 | 137.15  | 15.09   | 407.98   | 208.99  | 2.97 *    | 0.0307 |
| QPCT      | 990687  | 275.35  | 43.75   | 818.88   | 325.99  | 2.97 *    | 0.0423 |
| MAPT      | 4060307 | 19.30   | 8.61    | 57.00    | 18.22   | 2.95 *    | 0.0207 |
| WDR6      | 6510546 | 304.63  | 63.15   | 892.55   | 300.52  | 2.93 *    | 0.0282 |
| TRPC3     | 60347   | 19.45   | 3.45    | 56.95    | 32.17   | 2.93 *    | 0.0214 |
| PLEKHA6   | 2260021 | 77.05   | 15.35   | 223.48   | 93.26   | 2.90 *    | 0.0119 |
| KRT32     | 1500762 | 37.23   | 45.84   | 105.60   | 68.64   | 2.84 *    | 0.0253 |
| VAT1L     | 450452  | 75.45   | 4.62    | 213.60   | 114.68  | 2.83 *    | 0.0176 |
| A030005L1 | 6110487 | 35.20   | 48.44   | 99.03    | 82.30   | 2.81 *    | 0.0367 |
| P2RY14    | 6580379 | 236.53  | 65.46   | 665.20   | 337.05  | 2.81 *    | 0.0448 |
| ABHD2     | 3800240 | 43.40   | 20.72   | 121.50   | 48.05   | 2.80 *    | 0.0107 |
| 4732456N1 | 6620427 | 34.25   | 24.08   | 94.98    | 49.12   | 2.77 *    | 0.0468 |
| D730001G1 | 3780364 | 82.38   | 118.59  | 228.35   | 184.47  | 2.77 *    | 0.0122 |
| RAPGEF4   | 2450601 | 38.00   | 31.20   | 105.00   | 30.35   | 2.76 *    | 0.0284 |
| SPRY4     | 3440692 | 143.10  | 60.54   | 395.40   | 99.75   | 2.76 *    | 0.044  |
| ABHD2     | 3450164 | 41.73   | 21.46   | 115.20   | 45.49   | 2.76 *    | 0.0163 |
| LOC100044 | 5900438 | 146.08  | 233.50  | 401.85   | 335.85  | 2.75 *    | 0.0412 |
| CLECSF12  | 1300673 | 35.50   | 13.45   | 97.30    | 79.17   | 2.74 *    | 0.0431 |

|           |         |         |         |          |         |           |        |
|-----------|---------|---------|---------|----------|---------|-----------|--------|
| A830053O2 | 3360537 | 18.98   | 31.12   | 51.73    | 47.76   | 2.73 *    | 0.0444 |
| MALT1     | 3830040 | 20.35   | 12.66   | 54.98    | 27.98   | 2.70 *    | 0.0335 |
| SEMA6D    | 6510270 | 146.03  | 88.38   | 394.40   | 152.71  | 2.70 *    | 0.0474 |
| ETV5      | 4860494 | 151.90  | 56.08   | 405.23   | 99.95   | 2.67 *    | 0.0431 |
| SPG21     | 7570008 | 721.00  | 149.94  | 1915.88  | 953.29  | 2.66 *    | 0.0204 |
| SDC3      | 6760762 | 2970.08 | 196.70  | 7678.38  | 2936.77 | 2.59 **   | 0.0016 |
| GM484     | 6270192 | 41.03   | 7.53    | 105.50   | 62.09   | 2.57 *    | 0.0348 |
| RELN      | 7610484 | 380.98  | 176.29  | 960.80   | 88.14   | 2.52 *    | 0.0304 |
| GPC3      | 3890500 | 794.23  | 243.45  | 1997.18  | 1204.45 | 2.51 *    | 0.0196 |
| SRXN1     | 2340431 | 21.35   | 6.20    | 53.63    | 43.56   | 2.51 *    | 0.0475 |
| LOC100047 | 1400053 | 5582.08 | 3064.32 | 14006.28 | 3736.39 | 2.51 **** | 0.0001 |
| HK3       | 4810575 | 89.18   | 4.71    | 223.43   | 163.15  | 2.51 *    | 0.0211 |
| CAR11     | 5670477 | 187.20  | 59.00   | 468.63   | 142.64  | 2.50 *    | 0.0247 |
| CACHD1    | 4480152 | 78.90   | 10.72   | 196.53   | 64.55   | 2.49 *    | 0.0431 |
| SLC11A1   | 1410019 | 26.15   | 6.93    | 64.93    | 64.25   | 2.48 *    | 0.0173 |
| FBP1      | 3180671 | 44.60   | 34.52   | 110.50   | 50.92   | 2.48 *    | 0.031  |
| CAR2      | 5290711 | 95.38   | 96.76   | 235.13   | 146.07  | 2.47 *    | 0.0163 |
| CITED4    | 5490743 | 91.13   | 70.31   | 224.48   | 129.03  | 2.46 *    | 0.0219 |
| TMEM100   | 1410168 | 81.90   | 23.20   | 201.25   | 73.85   | 2.46 *    | 0.0402 |
| MKKS      | 7200068 | 43.25   | 17.14   | 104.35   | 5.88    | 2.41 *    | 0.0455 |
| DCT       | 130392  | 6658.83 | 3882.30 | 15877.90 | 1548.89 | 2.38 **** | 0.0001 |
| MESDC1    | 6200209 | 50.65   | 9.32    | 120.23   | 47.74   | 2.37 *    | 0.0229 |
| PODN      | 3290301 | 25.75   | 11.06   | 60.03    | 15.88   | 2.33 *    | 0.0354 |
| DKK3      | 2680189 | 2289.08 | 391.56  | 5255.70  | 1258.71 | 2.30 *    | 0.0454 |
| HVCN1     | 620646  | 52.53   | 5.64    | 120.48   | 63.84   | 2.29 *    | 0.0262 |
| TCN2      | 5310133 | 211.18  | 60.58   | 482.95   | 143.57  | 2.29 *    | 0.0301 |
| DUSP10    | 2000494 | 26.23   | 6.77    | 59.30    | 22.03   | 2.26 *    | 0.0423 |
| OCIAD2    | 6350133 | 54.95   | 17.91   | 123.90   | 88.80   | 2.25 *    | 0.0241 |
| HSPB8     | 6280209 | 100.30  | 32.81   | 225.25   | 87.04   | 2.25 *    | 0.0317 |
| ABHD2     | 4540162 | 50.80   | 22.95   | 112.68   | 37.29   | 2.22 *    | 0.0428 |
| ADI1      | 6420561 | 217.98  | 44.67   | 478.55   | 269.81  | 2.20 *    | 0.0375 |
| RAPSN     | 3370482 | 32.10   | 8.99    | 70.08    | 38.65   | 2.18 *    | 0.0198 |
| NHSL1     | 50341   | 112.03  | 22.76   | 244.45   | 81.43   | 2.18 *    | 0.0229 |
| TSPAN12   | 6220273 | 30.53   | 8.13    | 66.20    | 21.42   | 2.17 *    | 0.0285 |
| DUSP4     | 3610487 | 32.35   | 5.76    | 70.15    | 18.54   | 2.17 *    | 0.0203 |
| CYP2F2    | 6040689 | 52.98   | 10.01   | 113.80   | 40.65   | 2.15 *    | 0.0464 |
| CDH3      | 840025  | 30.65   | 9.74    | 65.45    | 15.94   | 2.14 *    | 0.0327 |
| SCLY      | 3390484 | 227.03  | 54.72   | 479.40   | 110.94  | 2.11 *    | 0.0439 |
| KRTAP5-2  | 2510161 | 104.13  | 146.16  | 218.98   | 198.77  | 2.10 *    | 0.0483 |
| HPCAL1    | 4890735 | 58.53   | 19.12   | 122.63   | 25.05   | 2.10 *    | 0.0359 |
| TCF7      | 3780471 | 31.30   | 9.17    | 64.98    | 19.00   | 2.08 *    | 0.0387 |
| NUDT11    | 1170553 | 34.15   | 16.94   | 68.70    | 31.06   | 2.01 *    | 0.0339 |
| IL28RA    | 4390543 | 121.73  | 31.68   | 244.68   | 70.11   | 2.01 *    | 0.0345 |
| TRP53INP1 | 60291   | 34.35   | 11.85   | 69.03    | 9.07    | 2.01 *    | 0.0333 |
| XPNPEP2   | 2070376 | 119.80  | 48.72   | 240.58   | 23.17   | 2.01 *    | 0.0378 |
| NCAM1     | 3390731 | 242.95  | 96.11   | 126.38   | 121.42  | 0.52 *    | 0.0441 |
| REM1      | 1850156 | 249.15  | 24.32   | 129.38   | 93.08   | 0.52 *    | 0.0386 |
| RETNLA    | 1110709 | 1562.43 | 886.99  | 810.75   | 314.94  | 0.52 *    | 0.0248 |
| PDK4      | 4120131 | 72.88   | 63.58   | 37.80    | 15.08   | 0.52 *    | 0.035  |
| CENPK     | 4860600 | 72.48   | 10.56   | 37.38    | 17.37   | 0.52 *    | 0.0348 |
| E130016E0 | 610039  | 248.75  | 46.75   | 127.48   | 52.37   | 0.51 *    | 0.0363 |
| 3300001PO | 5700343 | 1494.83 | 281.99  | 746.00   | 286.64  | 0.50 *    | 0.0253 |
| PDLIM4    | 2940615 | 6843.70 | 386.52  | 3341.90  | 2219.24 | 0.49 **   | 0.0056 |
| OSR1      | 4250241 | 64.78   | 22.38   | 31.00    | 3.14    | 0.48 *    | 0.0423 |
| CNP       | 6940079 | 1272.60 | 66.59   | 603.50   | 424.66  | 0.47 *    | 0.0453 |
| NEGR1     | 70204   | 72.25   | 28.60   | 34.23    | 30.96   | 0.47 *    | 0.0223 |
| MLZE      | 7100093 | 71.53   | 9.27    | 33.60    | 18.85   | 0.47 *    | 0.0226 |
| CCL3      | 2760047 | 125.90  | 113.49  | 36.23    | 27.08   | 0.45 *    | 0.0111 |
| ODZ3      | 4010524 | 121.98  | 19.31   | 54.83    | 31.73   | 0.45 *    | 0.0487 |

|            |         |          |         |         |         |           |        |
|------------|---------|----------|---------|---------|---------|-----------|--------|
| KRT16      | 2970392 | 9765.55  | 4261.99 | 4307.50 | 2886.79 | 0.44 **** | 0.0001 |
| NKAIN4     | 5490619 | 74.10    | 18.63   | 32.58   | 25.52   | 0.44 *    | 0.0126 |
| CYR61      | 5900452 | 65.25    | 24.81   | 28.68   | 10.75   | 0.44 *    | 0.0279 |
| MATN4      | 2600360 | 1608.93  | 284.55  | 706.28  | 564.03  | 0.44 **   | 0.0073 |
| 2210023G0  | 7100458 | 72.78    | 39.06   | 31.93   | 8.36    | 0.44 *    | 0.0141 |
| INHBA      | 3060458 | 236.80   | 136.18  | 102.73  | 56.22   | 0.43 *    | 0.0207 |
| MMP15      | 6370521 | 1416.03  | 94.19   | 605.03  | 480.21  | 0.43 *    | 0.0156 |
| ZFP692     | 2570343 | 63.85    | 12.13   | 27.15   | 10.31   | 0.43 *    | 0.0274 |
| HRNR       | 2360603 | 708.35   | 447.77  | 300.03  | 133.15  | 0.42 *    | 0.0418 |
| GPR37L1    | 3130685 | 735.53   | 91.45   | 310.28  | 403.31  | 0.42 *    | 0.0342 |
| ITGA2B     | 6590433 | 63.25    | 20.19   | 26.45   | 6.41    | 0.42 *    | 0.027  |
| OTTMUSGC   | 2230703 | 64.80    | 53.26   | 27.03   | 14.34   | 0.42 *    | 0.0232 |
| DTNA       | 1260025 | 67.58    | 4.48    | 28.15   | 19.13   | 0.42 *    | 0.0178 |
| KLK11      | 1170612 | 115.00   | 38.29   | 47.80   | 10.93   | 0.42 *    | 0.0486 |
| AQP3       | 3360161 | 1322.65  | 613.53  | 543.08  | 226.60  | 0.41 *    | 0.02   |
| SIGLECH    | 6220164 | 55.78    | 27.80   | 22.65   | 8.28    | 0.41 *    | 0.0464 |
| FOSB       | 6420520 | 66.78    | 35.87   | 26.65   | 16.30   | 0.40 *    | 0.0159 |
| LIMS2      | 3180681 | 1491.40  | 173.53  | 585.50  | 252.07  | 0.39 **   | 0.0071 |
| KRT6B      | 1090730 | 4685.95  | 2678.10 | 1828.45 | 869.49  | 0.39 *    | 0.0233 |
| NSG2       | 2710341 | 247.35   | 37.91   | 95.95   | 145.19  | 0.39 **   | 0.0091 |
| TUBB4      | 2600176 | 210.55   | 59.93   | 80.55   | 58.95   | 0.38 *    | 0.0249 |
| MMP13      | 5690131 | 1336.38  | 739.17  | 507.15  | 237.58  | 0.38 *    | 0.0135 |
| RBP2       | 2000273 | 233.75   | 64.36   | 88.25   | 40.97   | 0.38 *    | 0.0122 |
| SPRR2H     | 6770204 | 62.55    | 51.77   | 23.28   | 2.35    | 0.37 *    | 0.0183 |
| S100A8     | 1190546 | 7269.33  | 2164.62 | 2701.40 | 2436.94 | 0.37 ***  | 0.0003 |
| EPHA3      | 620736  | 218.95   | 172.91  | 81.15   | 65.62   | 0.37 *    | 0.0175 |
| D03001311t | 430739  | 60.70    | 50.52   | 22.23   | 16.40   | 0.37 *    | 0.0208 |
| KLHL30     | 1580168 | 219.13   | 61.75   | 80.13   | 46.38   | 0.37 *    | 0.0165 |
| CHST3      | 2810315 | 222.13   | 33.76   | 79.73   | 71.73   | 0.36 *    | 0.0141 |
| SEMA4F     | 1470521 | 322.40   | 48.29   | 114.83  | 36.13   | 0.36 *    | 0.0316 |
| TCFL5      | 5900142 | 64.65    | 25.48   | 22.75   | 9.96    | 0.35 *    | 0.0118 |
| TNC        | 5420605 | 109.20   | 63.44   | 37.65   | 23.89   | 0.34 *    | 0.0358 |
| ALDH1L2    | 5810367 | 72.00    | 37.87   | 24.45   | 19.01   | 0.34 **   | 0.0043 |
| ADAM23     | 3940286 | 5687.13  | 1199.18 | 1919.85 | 1787.43 | 0.34 **   | 0.003  |
| AATK       | 6940196 | 4631.00  | 207.88  | 1561.90 | 1557.33 | 0.34 *    | 0.015  |
| STFA1      | 3360056 | 11241.10 | 2440.06 | 3715.23 | 2094.17 | 0.33 **** | 0.0001 |
| SLC35F1    | 5890193 | 108.40   | 27.46   | 35.10   | 47.54   | 0.32 *    | 0.0316 |
| NEURL      | 730754  | 1668.23  | 261.93  | 537.03  | 404.80  | 0.32 ***  | 0.0008 |
| TMPRSS5    | 6040524 | 74.35    | 20.47   | 23.93   | 17.95   | 0.32 **   | 0.0025 |
| LCE3A      | 1340521 | 60.10    | 51.93   | 19.15   | 8.85    | 0.32 *    | 0.0139 |
| RASGEF1C   | 50440   | 1275.08  | 134.48  | 405.43  | 582.53  | 0.32 **   | 0.0096 |
| RASGEF1C   | 1990086 | 296.65   | 26.22   | 92.93   | 133.98  | 0.31 *    | 0.0348 |
| ALDH1L2    | 7560747 | 580.68   | 223.84  | 180.93  | 156.42  | 0.31 *    | 0.0462 |
| 4CYTL1     | 4050746 | 59.53    | 89.85   | 18.50   | 21.40   | 0.31 *    | 0.0137 |
| GRIK5      | 3830390 | 49.10    | 11.24   | 15.05   | 13.35   | 0.31 *    | 0.0406 |
| SERPINB2   | 4050762 | 341.55   | 270.68  | 103.90  | 47.43   | 0.30 *    | 0.0143 |
| SPRR1B     | 6450228 | 3628.78  | 2420.42 | 1096.90 | 688.69  | 0.30 *    | 0.044  |
| SNAPC3     | 6860082 | 53.48    | 10.07   | 16.13   | 10.57   | 0.30 *    | 0.0248 |
| LOC100047  | 5890273 | 71.48    | 36.32   | 21.55   | 6.10    | 0.30 **   | 0.0027 |
| DEGS2      | 1820592 | 68.90    | 64.39   | 20.53   | 10.46   | 0.30 **   | 0.0037 |
| C1QTNF3    | 270671  | 118.10   | 129.09  | 34.98   | 9.17    | 0.30 *    | 0.0149 |
| MDGA2      | 2810349 | 180.75   | 28.52   | 52.33   | 61.86   | 0.29 *    | 0.0267 |
| GPR17      | 1410762 | 1574.43  | 340.96  | 451.13  | 604.28  | 0.29 ***  | 0.0009 |
| FLRT1      | 4050022 | 56.88    | 15.37   | 15.70   | 15.58   | 0.28 *    | 0.0134 |
| PSMD8      | 5420520 | 1276.58  | 820.86  | 350.35  | 492.09  | 0.27 **   | 0.0059 |
| OTTMUSGC   | 270722  | 109.53   | 27.00   | 29.38   | 32.81   | 0.27 *    | 0.0188 |
| SPRR2F     | 2760669 | 107.83   | 59.15   | 28.90   | 23.29   | 0.27 *    | 0.0207 |
| B23031211f | 1710286 | 94.35    | 57.22   | 25.03   | 35.96   | 0.27 *    | 0.0419 |
| CNTN6      | 50767   | 347.75   | 64.37   | 91.53   | 108.58  | 0.26 **   | 0.0084 |

|           |         |         |         |        |        |          |        |
|-----------|---------|---------|---------|--------|--------|----------|--------|
| SLN       | 2030451 | 174.98  | 88.35   | 46.03  | 25.79  | 0.26 *   | 0.0261 |
| MMP17     | 3440053 | 611.45  | 55.93   | 159.45 | 187.89 | 0.26 *   | 0.0245 |
| RPTN      | 2690609 | 3337.50 | 2094.80 | 850.10 | 665.44 | 0.25 *   | 0.0478 |
| KCNA1     | 520593  | 160.88  | 60.27   | 40.53  | 59.98  | 0.25 *   | 0.0377 |
| APBA2     | 6550195 | 43.23   | 5.36    | 10.48  | 19.25  | 0.24 *   | 0.0489 |
| KLK9      | 2630292 | 43.63   | 21.46   | 10.35  | 11.85  | 0.24 *   | 0.0454 |
| KLK13     | 2450364 | 248.33  | 165.75  | 57.45  | 41.61  | 0.23 **  | 0.0011 |
| IL24      | 6180609 | 111.03  | 59.37   | 24.90  | 21.08  | 0.22 *   | 0.0117 |
| KLK13     | 7040110 | 71.45   | 43.43   | 15.53  | 8.69   | 0.22 *** | 0.0008 |
| ARG1      | 1190445 | 1059.08 | 482.12  | 225.95 | 59.92  | 0.21 *   | 0.0131 |
| LCE3C     | 7040079 | 991.55  | 905.11  | 207.43 | 118.89 | 0.21 *   | 0.0198 |
| ARTN      | 240608  | 56.28   | 30.91   | 11.55  | 5.05   | 0.21 **  | 0.0072 |
| STFA2     | 5050047 | 4302.08 | 1497.60 | 879.58 | 910.00 | 0.20 **  | 0.0068 |
| KLK13     | 4120598 | 212.53  | 132.39  | 43.18  | 35.74  | 0.20 **  | 0.0036 |
| CCL4      | 6940184 | 595.85  | 348.57  | 119.18 | 71.80  | 0.20 **  | 0.0078 |
| RPTN      | 2230288 | 979.85  | 704.73  | 195.50 | 157.29 | 0.20 *   | 0.0197 |
| STK32A    | 2260039 | 181.70  | 113.63  | 33.00  | 15.76  | 0.18 *   | 0.0104 |
| CXCL1     | 3610082 | 570.75  | 224.32  | 103.43 | 52.16  | 0.18 *   | 0.0201 |
| LCE3B     | 450553  | 487.30  | 464.20  | 78.03  | 77.37  | 0.16 *   | 0.0348 |
| 2310007F0 | 4290446 | 704.88  | 654.77  | 108.70 | 94.65  | 0.15 **  | 0.0032 |
| ATF4      | 2480692 | 174.98  | 91.70   | 26.10  | 3.33   | 0.15 *   | 0.0103 |
| IFI202B   | 650601  | 39.28   | 42.38   | 5.53   | 2.22   | 0.14 *   | 0.0424 |
| CRTAC1    | 1190437 | 205.65  | 123.43  | 28.63  | 32.55  | 0.14 **  | 0.0023 |
| IL1RL1    | 3870291 | 132.35  | 157.86  | 17.93  | 3.52   | 0.14 *   | 0.0481 |
| DEFB14    | 2320681 | 941.38  | 1158.30 | 125.05 | 75.91  | 0.13 *   | 0.0154 |
| SPRR2I    | 4880070 | 74.43   | 61.52   | 9.45   | 15.48  | 0.13 *** | 0.0001 |
| LCE3B     | 1820091 | 145.88  | 177.41  | 15.90  | 15.92  | 0.11 *   | 0.0249 |
| SPRR2K    | 3170121 | 107.75  | 137.80  | 10.15  | 16.08  | 0.09 **  | 0.0043 |
| IL1B      | 3420754 | 550.08  | 573.16  | 51.38  | 33.35  | 0.09 *   | 0.0133 |
| CCL4      | 7150500 | 92.95   | 63.07   | 8.60   | 5.84   | 0.09 *   | 0.0497 |
| EG408196  | 6180735 | 1000.70 | 850.69  | 81.78  | 105.99 | 0.08 **  | 0.0063 |
| LCE3F     | 1660754 | 866.73  | 781.35  | 60.75  | 77.23  | 0.07 *   | 0.0167 |
| GZMD      | 3390280 | 98.68   | 57.84   | 4.95   | 3.24   | 0.05 **  | 0.0061 |
| TOMM22    | 1010497 | 710.00  | 398.84  | 35.00  | 2.12   | 0.05 *** | 0.0009 |
| CXCL2     | 5390639 | 178.98  | 106.77  | 4.13   | 1.38   | 0.02 **  | 0.0026 |
| EG433016  | 4260025 | 100.78  | 147.18  | 2.25   | 3.89   | 0.02 **  | 0.004  |
| TREM1     | 4280504 | 97.75   | 37.79   | 0.63   | 6.33   | 0.01 **  | 0.0042 |

SI table 4b Chemokine expression in mouse tumors

|        | Probe ID | mean    | SD     | mean    | SD     | FC   | Two-way ANOVA |
|--------|----------|---------|--------|---------|--------|------|---------------|
| CCL11  | 6060520  | 406.08  | 110.75 | 1190.88 | 543.19 | 3.26 | < 0.05        |
| CCL19  | 4220717  | 60.68   | 12.62  | 134.15  | 63.02  | 2.21 |               |
| CXCL10 | 3140209  | 26.00   | 8.25   | 48.40   | 36.39  | 1.86 |               |
| CCL24  | 7330681  | 36.75   | 12.47  | 48.33   | 26.46  | 1.31 |               |
| CXCL13 | 3060040  | 8.58    | 4.87   | 11.00   | 5.19   | 1.28 |               |
| CCL21A | 1710612  | 1137.90 | 716.89 | 1454.10 | 128.60 | 1.28 |               |
| CCL5   | 1690768  | 55.45   | 27.10  | 70.20   | 56.62  | 1.27 |               |
| CCL2   | 110112   | 29.98   | 8.82   | 37.70   | 10.22  | 1.26 |               |
| CCL27  | 5340358  | 1260.90 | 313.78 | 1418.70 | 110.74 | 1.13 |               |
| CCL9   | 7050538  | 1395.73 | 109.47 | 1543.13 | 388.56 | 1.11 |               |
| CXCL16 | 630274   | 617.08  | 74.09  | 620.25  | 168.98 | 1.01 |               |
| CCL6   | 7040717  | 165.55  | 27.69  | 163.13  | 47.11  | 0.99 |               |
| CCL22  | 3290674  | 6.98    | 2.63   | 6.75    | 3.90   | 0.97 |               |
| CXCL12 | 7550112  | 1619.93 | 234.43 | 1565.35 | 247.28 | 0.97 |               |
| CXCL4  | 4040524  | 263.28  | 90.35  | 248.73  | 44.74  | 0.94 |               |
| CCL7   | 4670674  | 148.35  | 14.55  | 137.15  | 22.69  | 0.92 |               |
| CCL21C | 4230315  | 842.13  | 690.55 | 744.38  | 197.33 | 0.88 |               |
| CCL1   | 1190241  | 55.80   | 17.79  | 49.00   | 35.55  | 0.88 |               |
| CXCL9  | 10598    | 107.45  | 27.19  | 88.55   | 12.65  | 0.82 |               |
| CCL25  | 6900546  | 109.63  | 10.34  | 74.55   | 21.73  | 0.68 |               |
| CCL17  | 6620437  | 128.65  | 68.12  | 84.43   | 36.60  | 0.66 |               |
| CXCL14 | 3520349  | 477.33  | 35.51  | 313.20  | 92.45  | 0.66 |               |
| CCL3   | 2760047  | 80.90   | 107.38 | 36.23   | 27.08  | 0.45 | < 0.01        |
| CXCL1  | 3610082  | 335.75  | 279.68 | 103.43  | 52.16  | 0.31 | < 0.05        |
| CXCL2  | 5390639  | 82.15   | 121.67 | 4.13    | 1.38   | 0.05 | < 0.01        |
| CCL4   | 7150500  | 358.35  | 452.48 | 8.60    | 5.84   | 0.02 | < 0.01        |

|       | Probe ID | mean   | SD        | mean   | SD        | FC        |
|-------|----------|--------|-----------|--------|-----------|-----------|
| CXCR4 | 160392   | 94.925 | 5.1678695 | 147.65 | 57.512542 | 1.5554385 |
| CXCR3 | 5810576  | 14.4   | 7.7501613 | 21.45  | 13.09895  | 1.4895833 |
| CCR6  | 1010132  | 55.1   | 11.721988 | 57.85  | 16.637683 | 1.0499093 |
| CCR5  | 1240646  | 39.65  | 17.542306 | 39.325 | 13.941731 | 0.9918033 |
| CCR7  | 2570291  | 12.025 | 4.4024851 | 8.725  | 3.840817  | 0.7255717 |

SI table 5a Genotyping primer

| Target     | 5' Primer              | 3' Primer                  | 3' Primer                | WT product | Mut product |
|------------|------------------------|----------------------------|--------------------------|------------|-------------|
| Tyr:Cre-ER | ccaccagcttgcgatgctc    | acgttgatgccggtgaacg        | n.a.                     | 0          | 570         |
| BrafV600E  | tgagtattttgtggcaactgc  | ctctgctgggaaagcggc         | n.a.                     | 185        | 308         |
| PTEN WT    | gtcaccaggatgcttctgac   | gtgacatcaacatgcaacactg     | n.a.                     | 500        | 0           |
| PTEN FL    | gtcaccaggatgcttctgac   | gaaacggccttaacgacgtag      | n.a.                     | 0          | 500         |
| CAT-STA    | agaatcacggtagctgggttaa | acattcataaaggacttgggaggtgt | n.a.                     | 600        | 900         |
| RosaYFP    | aaagtcgctctgagttgttat  | aagaccgcgaagagttgtc        | ggagcgggagaaatggatag     | 600        | 320         |
| RosaSIY    | aaagtcgctctgagttgttat  | aagaccgcgaagagttgtc        | aaatcagagagatcctcataaagg | 235        | 190         |
| Batf3      | tgctatgcacaaccacaacc   | gttgtgagtcgaaaccacgc       | gatacaggctgctgatctgag    | 288        | 600         |

## SI table 5b Antibodies

| Antigen           | Fluorophore | clone          | dilution | vendor      |
|-------------------|-------------|----------------|----------|-------------|
| CD103             | APC         | 2E7.           | 1/200    | eBio        |
| CD11b             | PE          | M1/70          | 1/200    | eBio        |
| CD11b             | PerCP-Cy5.5 | M1/70          | 1/200    | BD          |
| CD11b             | PE-Cy7      | M1/70          | 1/200    | Bioleg      |
| CD11c             | APC-CY7     | N418           | 1/200    | BioLeg      |
| CD19              | PB          | eBio1D3        | 1/200    | ebioscience |
| CD205 (DEC205)    | PE-Cy7      | 205yekta       | 1/200    | ebioscience |
| CD207 (Langerin)  | AF488       | eBioRMUL.2     | 1/100    | ebioscience |
| CD223 (Lag3)      | APC         | C9B7W          | 1/200    | BioLeg      |
| CD223 (Lag3)      | PE          | C9B7W          | 1/200    | eBio        |
| CD279 (PD-1)      | PE-Cy7      | RMP1-30        | 1/200    | BioLeg      |
| CD279 (PD-1)      | APC         | RMPI-30        | 1/200    | Invitrogen  |
| CD3               | AX700       | 17A2           | 1/200    | eBio        |
| CD3e              | Ef450       | 145-2C11       | 1/200    | ebioscience |
| CD4               | PerCP-Cy5.5 | RM4-5          | 1/200    | BioLeg      |
| CD40              | PE          | 3/23.          | 1/200    | BD          |
| CD44              | FITC        | IM7            | 1/200    | BD          |
| CD45              | AX488       | 30-F11         | 1/200    | BioLeg      |
| CD45              | PE          | 30-F11         | 1/200    | Bioleg      |
| CD45RA            | PE          | 14.8           | 1/200    | BD          |
| CD62L             | PE-Cy7      | MEL-14         | 1/200    | ebioscience |
| CD80              | APC         | 16-10A1        | 1/200    | BD          |
| CD86              | FITC        | GL1            | 1/200    | PharMingen  |
| CD8a              | APC-CY7     | 53-6.7         | 1/200    | BioLeg      |
| CD8a              | PE          | 53-6.7         | 1/200    | PharMingen  |
| CD8a              | PerCP       | 53-6.7         | 1/200    | BD          |
| F4/80             | FITC        | BM8            | 1/400    | Abcam       |
| F4/80             | PerCP-Cy5.5 | BM8            | 1/400    | eBio        |
| F4/80             | PB          | Bm8            | 1/400    | BioLegend   |
| FC BLOCK          |             | 93             | 1/200    | BioLeg      |
| Fixable Viability | eFlour 450  | Amine-reactive | 1/200    | eBio        |
| Foxp3             | APC         | FJK-16a        | 1/200    | eBio        |
| gdTCR             | PE          | GL3            | 1/200    | BD          |
| Gr1               | APC         | RB6-8C2        | 1/100    | BD          |
| Gr1               | Ax700       | RB6-8C5        | 1/100    | ebioscience |
| I-A/I-E           | AX700       | M5/114.15.2    | 1/200    | eBio        |
| I-A/I-E           | PE-Cy7      | M5/114.15.2    | 1/200    | Bioleg      |
| Ly6C              | PerCP-Cy5.5 | HK1.4          | 1/200    | ebioscience |
| Streptavidin      | APC         |                | 1/500    | BD          |
| TCRbeta           | AX700       | H57-597        | 1/100    | Biolegend   |

SI table 5c Primer Probe

| Target      | 5' Primer                  | 3' Primer                | Probe (TaqMan) | Sybr green |
|-------------|----------------------------|--------------------------|----------------|------------|
| ATF3        | GCTGGAGTCAGTTACCGTCAA      | CGCCTCCTTTTCTCTCAT       |                | yes        |
| Batf3       | AGAAGGCTGACAAGCTCCAC       | CCTTCAGCTTCGAAATCTCC     |                | yes        |
| CCL2        | CATCCACGTGTTGGCTCA         | GATCATCTTGCTGGTGAATGAGT  |                | yes        |
| CCL3/Mip1a  | TGCCCTTGCTGTTCTTCTCT       | GTGGAATCTTCCGGCTGTAG     |                | yes        |
| CCL4/Mip1b  | GCCCTCTCTCCTCTTGCT         | GGAGGGTCAGAGCCCATT       |                | yes        |
| CCR5        | TCATGTTAGATTTGTACAGCTCTCCT | TGACCTTGAAAATCCATCC      | 82             | no         |
| CXCL1       | AGACCATGGCTGGGATTAC        | AGTGTGGCTATGACTTCGGT     |                | yes        |
| CXCL2       | ACTGAACAAAGGCAAGGCTAAC     | CTTCGGTTGAGGGACAGCAG     |                | yes        |
| CXCR2       | CTCTGCTCACAAACAGCGTC       | CAGAATAGAGGGCATGCCAGA    |                | yes        |
| e-catherin  | ATCCTCGCCCTGCTGATT         | ACCACCGTTCTCCTCCGTA      | 18             | no         |
| IFNb        | GGAAAGATTGACGTGGGAGA       | CCTTTGCACCTCCAGTAAT      | 108            | no         |
| IFNg        | GGAGGAACTGGCAAAGGAT        | TTCAAGACTTCAAAGAGTCTGAGG |                | yes        |
| IL10        | CAGAGCCACATGCTCCTAGA       | TGTCCAGCTGGTCTTTGTT      | 41             | no         |
| IL2         | AACCTGAAACTCCCCAGGAT       | TCATCGAATTGGCACTCAA      |                | yes        |
| IL4         | CATCGGCATTTTGAACGAG        | CGAGCTCACTCTGTGGTG       |                | yes        |
| IL6         | GCTACCAAAGTGGATATAATCAGGA  | CCAGGTAGCTATGGTACTCCAGAA |                | yes        |
| IRF8        | CCGGCAAGCAGGATTACA         | GCTTTGTCTCCCTCTTAAACTTC  |                | yes        |
| Itgae       | GCAGAGAACCACAGGACGA        | CAATGATGAGAGGCAAAGAGC    |                | yes        |
| PD-L1       | CCATCCTGTTGTTCTCATTG       | TCCACATCTAGCATTCTCACTTG  |                | yes        |
| TGFb        | GCAGCTCCTCATCGTGTG         | AGAGGTGGCAGAAACTGTAAT    |                | yes        |
| EFNB3 human | TGGAACCTCGGCGAATAAGAG      | CGATCTGAGGGTACAGCACA     |                | yes        |
| APC2 human  | GTGCCATGAACGAGCTAGG        | TCTTGTGCATCTCATAGTCAACC  |                | yes        |
| TCF1 human  | GTGACCCAGAGCCCCTTC         | GGGCTTGTGGCTGTAGAGG      |                | yes        |
| myc human   | GAACCAGAGAAACCTAACAGTGC    | CGAAGCAGCTCTATTTCTGGA    |                | yes        |
| TCF12 human | GTGGTTGGATGCGGAGAC         | AGCTCCTTGTGGTCCCTA       |                | yes        |
| VEGFA human | TGCCCGCTGCTGTCTAAT         | TCTCCGCTCTGAGCAAGG       |                | yes        |
| CCL4 human  | CTCTCCAGCGCTCTCAGC         | ACCACAAAGTTGCGAGGAAG     |                | yes        |
| ATF3 human  | CGTGAGTCCTCGGTGCTC         | GCCTGGGTGTTGAAGCAT       |                | yes        |

## SI table 5d ChIP assay primer

| Target     | 5' Primer               | 3' Primer                |
|------------|-------------------------|--------------------------|
| CCL2       | GTCCTGTCATGCTTCTGGG     | GGTGATATGCTGGGAAGGG      |
| CCL4       | TGTCTGCCCTCTCTCCTC      | CCCCAGTTGGAAGACTGGAC     |
|            |                         |                          |
| CCL4 human | CTGTACCACTTCCTTTTCTTCTC | CTGAAGCTAGCTGAGTGAGGAGTT |
| CCL2 human | TCTGCAGTTTTCGCTTCAGAG   | GGCTGGAGGCGAGAGTGCGAGC   |

## SI table 5e siRNA oligos

| Target       | 5' oligo              | 3' oligo               |
|--------------|-----------------------|------------------------|
| ATF3         | AAACAGCAUUUGAUUACAtt  | UGUAUAUCAAAUGUCUGUUUct |
| CTNNB1       | CACUUGCAAUAAUACAAAtt  | UUUGUAAUUAUUGCAAGUGag  |
| ATF3 human   | GCAAAGUGCCGAAACAAGAtt | UCUUGUUUCGGCACUUUGCag  |
| CTNNB1 human | GGAUGUUCACAACCGAAUUt  | AAUUCGGUUGUGAACAUCc    |
| control      | number                | 4390843                |
